# Supplementary material for: CD34 is a target for covalent EGFR inhibitors to eliminate stem/progenitor cells in acute and chronic myeloid leukemia
Source: Research Square preprint supplement (doi:10.21203/rs.3.rs-646513/v1), 2021-07-12
Supplement: Supplementary file 2 [file 9093ef3e8fffa6b243bcf5df.xlsx]

## Sheet: all identified pY Peptides
Supplementary Table 1: Comparative analysis of tyrosine-phosphorylated peptides identified in vehicle or osimertinib treated CD34+ cells purified from three AML patients by LC-MS.
Peptide	-10lgP	Mass	Length	ppm	m/z	RT	Area Sample 1	Area Sample 2	Area Sample 3	Area Sample 4	Area Sample 5	Area Sample 6	Fraction	Scan	Source File	#Feature	#Feature Sample 1	#Feature Sample 2	#Feature Sample 3	#Feature Sample 4	#Feature Sample 5	#Feature Sample 6	Accession	PTM	AScore	Found By
YC(+57.02)RPESQEHPEADPGSAAPY(+79.97)LK	83.16	2581.09	22	0.7	861.373	20.82	11200000	11700000	9550000	1040000	973000	978000	2	F2:7818	3P_AZD_2uM_1D_Ppetide_Tyr_IP_CTL2.raw	7	2	1	1	1	1	1	sp|P40763|STAT3_HUMAN:tr|G8JLH9|G8JLH9_HUMAN	Carbamidomethylation; Phosphorylation (STY)	C2:Carbamidomethylation:1000.00;Y20:Phosphorylation (STY):97.69	PEAKS DB
SREEDPTLTEEEISAMY(+79.97)SSVNKPGQLVNK	79.18	3330.53	29	1.1	1111.19	45.95				1400000	1000000	975000	6	F6:17019	3P_AZD_2uM_1D_Ppetide_Tyr_IP_AZD3.raw	4	0	0	0	2	1	1	sp|Q9NWQ8|PHAG1_HUMAN	Phosphorylation (STY)	Y17:Phosphorylation (STY):14.02	PEAKS DB
EIS(+79.97)DDEAEEEKGEKEEEDKDDEEKPK	77.49	3158.28	26	1.5	790.579	12.21	333000	457000	426000				2	F2:3730	3P_AZD_2uM_1D_Ppetide_Tyr_IP_CTL2.raw	3	1	1	1	0	0	0	sp|P08238|HS90B_HUMAN	Phosphorylation (STY)	S3:Phosphorylation (STY):1000.00	PEAKS DB
ALPAQVDDPPEPVY(+79.97)ANIER	71.62	2173.01	19	2.3	1087.51	43.99	741000	1090000	1240000	1790000	1880000	1570000	1	F1:17440	3P_AZD_2uM_1D_Ppetide_Tyr_IP_CTL1.raw	8	1	2	1	1	2	1	tr|E9PNT2|E9PNT2_HUMAN	Phosphorylation (STY)	Y14:Phosphorylation (STY):1000.00	PEAKS DB
HTDDEMTGY(+79.97)VATR	68.82	1574.61	13	0.5	788.311	16.2	6410000	7720000	6180000	973000	907000	865000	2	F2:5631	3P_AZD_2uM_1D_Ppetide_Tyr_IP_CTL2.raw	9	2	2	2	1	1	1	sp|Q16539|MK14_HUMAN:tr|B4E0K5|B4E0K5_HUMAN:tr|E7EX54|E7EX54_HUMAN	Phosphorylation (STY)	Y9:Phosphorylation (STY):40.21	PEAKS DB
RAQEPVSGC(+57.02)GSPEQDPQKQAEEERQEEPEY(+79.97)ENVVPISRPPEP	68.82	4881.18	42	3.2	1221.31	35.46				1800000	1390000	1190000	6	F6:12614	3P_AZD_2uM_1D_Ppetide_Tyr_IP_AZD3.raw	3	0	0	0	1	1	1	tr|A0A0A0MR54|A0A0A0MR54_HUMAN:sp|Q14162|SREC_HUMAN	Carbamidomethylation; Phosphorylation (STY)	C9:Carbamidomethylation:1000.00;Y30:Phosphorylation (STY):67.12	PEAKS DB
LGEDPY(+79.97)YTEN(+.98)GGGQGYSSGPGTSPEAQGK	68.39	2983.2	29	0.7	995.409	28.4	204000	212000	162000				1	F1:11027	3P_AZD_2uM_1D_Ppetide_Tyr_IP_CTL1.raw	3	1	1	1	0	0	0	sp|P28906|CD34_HUMAN	Phosphorylation (STY); Deamidation (NQ)	Y6:Phosphorylation (STY):14.02;N10:Deamidation (NQ):0.00	PEAKS DB
HTDDEM(+15.99)TGY(+79.97)VATR	68.12	1590.6	13	1.1	796.309	10.56	3210000	2860000	3790000	402000	436000	406000	2	F2:2908	3P_AZD_2uM_1D_Ppetide_Tyr_IP_CTL2.raw	10	2	2	2	1	2	1	sp|Q16539|MK14_HUMAN:tr|B4E0K5|B4E0K5_HUMAN:tr|E7EX54|E7EX54_HUMAN	Oxidation (M); Phosphorylation (STY)	M6:Oxidation (M):1000.00;Y9:Phosphorylation (STY):39.76	PEAKS DB
IQNTGDY(+79.97)YDLYGGEK	68.08	1814.74	15	1.1	908.378	32.84	937000	1000000	940000	157000	157000	137000	2	F2:13411	3P_AZD_2uM_1D_Ppetide_Tyr_IP_CTL2.raw	6	1	1	1	1	1	1	sp|Q06124|PTN11_HUMAN	Phosphorylation (STY)	Y7:Phosphorylation (STY):14.02	PEAKS DB
AQEPVSGC(+57.02)GS(+79.97)PEQDPQKQAEEERQEEPEYENVVPISRPPEP	67.65	4725.08	41	0.2	1182.28	38.78					537000		5	F5:14079	3P_AZD_2uM_1D_Ppetide_Tyr_IP_AZD2.raw	1	0	0	0	0	1	0	tr|A0A0A0MR54|A0A0A0MR54_HUMAN:sp|Q14162|SREC_HUMAN	Carbamidomethylation; Phosphorylation (STY)	C8:Carbamidomethylation:1000.00;S10:Phosphorylation (STY):0.00	PEAKS DB
IEDVGS(+79.97)DEEDDSGKDK	66.22	1816.69	16	1.3	909.353	11.97	432000	554000	586000				3	F3:3475	3P_AZD_2uM_1D_Ppetide_Tyr_IP_CTL3.raw	3	1	1	1	0	0	0	sp|P08238|HS90B_HUMAN	Phosphorylation (STY)	S6:Phosphorylation (STY):90.57	PEAKS DB
SREEDPTLTEEEIS(+79.97)AM(+15.99)YSSVNKPGQLVNK	66.1	3346.53	29	2.6	1116.52	35.7			265000			1070000	6	F6:12708	3P_AZD_2uM_1D_Ppetide_Tyr_IP_AZD3.raw	3	0	0	1	0	0	2	sp|Q9NWQ8|PHAG1_HUMAN	Phosphorylation (STY); Oxidation (M)	S14:Phosphorylation (STY):0.00;M16:Oxidation (M):1000.00	PEAKS DB
LIY(+79.97)DFIEDQGGLEAVR	66.06	1916.89	16	1.6	959.455	56.43	94400	111000	226000	279000	257000	243000	1	F1:20857	3P_AZD_2uM_1D_Ppetide_Tyr_IP_CTL1.raw	6	1	1	1	1	1	1	sp|P42768|WASP_HUMAN	Phosphorylation (STY)	Y3:Phosphorylation (STY):1000.00	PEAKS DB
ESEDKPEIEDVGS(+79.97)DEEEEKKDGDK	65.68	2815.14	24	1.5	704.794	15.83	941000	1070000					1	F1:5295	3P_AZD_2uM_1D_Ppetide_Tyr_IP_CTL1.raw	2	1	1	0	0	0	0	sp|P07900|HS90A_HUMAN	Phosphorylation (STY)	S13:Phosphorylation (STY):62.51	PEAKS DB
KPTY(+79.97)DPVSEDQDPLSSDFK	65.66	2246.96	19	1.5	749.996	37.42	1140000	1130000	1250000				1	F1:14810	3P_AZD_2uM_1D_Ppetide_Tyr_IP_CTL1.raw	3	1	1	1	0	0	0	sp|Q07912|ACK1_HUMAN:tr|C9J1X3|C9J1X3_HUMAN:tr|H0Y5H7|H0Y5H7_HUMAN	Phosphorylation (STY)	Y4:Phosphorylation (STY):0.00	PEAKS DB
IEDVGS(+79.97)DEEDDSGKDKK	65.12	1944.78	17	2.1	649.27	10.1	1150000	1010000	1260000				2	F2:2700	3P_AZD_2uM_1D_Ppetide_Tyr_IP_CTL2.raw	3	1	1	1	0	0	0	sp|P08238|HS90B_HUMAN	Phosphorylation (STY)	S6:Phosphorylation (STY):62.39	PEAKS DB
TTDGVY(+79.97)EGVAIGGDR	64.78	1588.68	15	2	795.347	28.36	136000	170000	135000				2	F2:11432	3P_AZD_2uM_1D_Ppetide_Tyr_IP_CTL2.raw	3	1	1	1	0	0	0	sp|P53396|ACLY_HUMAN	Phosphorylation (STY)	Y6:Phosphorylation (STY):77.53	PEAKS DB
QEEPEY(+79.97)ENVVPISRPPEP	64.68	2187.97	18	-1	1094.99	44.38	290000	292000	336000				2	F2:18280	3P_AZD_2uM_1D_Ppetide_Tyr_IP_CTL2.raw	3	1	1	1	0	0	0	tr|A0A0A0MR54|A0A0A0MR54_HUMAN:sp|Q14162|SREC_HUMAN	Phosphorylation (STY)	Y6:Phosphorylation (STY):83.89	PEAKS DB
SSLS(+79.97)GDEEDELFKGATLK	63.66	2004.89	18	2.2	1003.46	44.59				1070000	1030000	986000	6	F6:16468	3P_AZD_2uM_1D_Ppetide_Tyr_IP_AZD3.raw	3	0	0	0	1	1	1	sp|Q5T1M5|FKB15_HUMAN:tr|A0A0A0MT60|A0A0A0MT60_HUMAN	Phosphorylation (STY)	S4:Phosphorylation (STY):12.16	PEAKS DB
KPTY(+79.97)DPVSEDQDPLSSDFKR	63.43	2403.06	20	1.8	802.03	31.72	815000	908000	850000	606000	505000	523000	2	F2:12911	3P_AZD_2uM_1D_Ppetide_Tyr_IP_CTL2.raw	6	1	1	1	1	1	1	sp|Q07912|ACK1_HUMAN:tr|C9J1X3|C9J1X3_HUMAN:tr|H0Y5H7|H0Y5H7_HUMAN	Phosphorylation (STY)	Y4:Phosphorylation (STY):0.00	PEAKS DB
S(+79.97)ASPDDDLGSSNWEAADLGNEER	63.2	2513.98	23	1.7	1258	44.13			44500				3	F3:18047	3P_AZD_2uM_1D_Ppetide_Tyr_IP_CTL3.raw	1	0	0	1	0	0	0	tr|E9PM92|E9PM92_HUMAN:sp|O00193|SMAP_HUMAN	Phosphorylation (STY)	S1:Phosphorylation (STY):0.00	PEAKS DB
ESEDKPEIEDVGS(+79.97)DEEEEKKDGDKK	62.2	2943.24	25	2.1	736.819	13.49	845000	917000	793000				1	F1:4186	3P_AZD_2uM_1D_Ppetide_Tyr_IP_CTL1.raw	3	1	1	1	0	0	0	sp|P07900|HS90A_HUMAN	Phosphorylation (STY)	S13:Phosphorylation (STY):41.98	PEAKS DB
SASS(+79.97)DTSEELNSQDSPPK	62.04	1957.78	18	2.6	979.899	18.32		57100					2	F2:6714	3P_AZD_2uM_1D_Ppetide_Tyr_IP_CTL2.raw	1	0	1	0	0	0	0	sp|O14745|NHRF1_HUMAN	Phosphorylation (STY)	S4:Phosphorylation (STY):0.00	PEAKS DB
SAS(+79.97)PDDDLGSSNWEAADLGNEER	61.47	2513.98	23	1.1	1258	44.15		23600					2	F2:18226	3P_AZD_2uM_1D_Ppetide_Tyr_IP_CTL2.raw	1	0	1	0	0	0	0	tr|E9PM92|E9PM92_HUMAN:sp|O00193|SMAP_HUMAN	Phosphorylation (STY)	S3:Phosphorylation (STY):11.10	PEAKS DB
LFDDPSY(+79.97)VNVQNLDK	61.25	1845.82	15	1.4	923.918	47.84	149000	167000	220000	83400		69000	2	F2:19449	3P_AZD_2uM_1D_Ppetide_Tyr_IP_CTL2.raw	5	1	1	1	1	0	1	sp|P29353|SHC1_HUMAN:tr|Q5T188|Q5T188_HUMAN:tr|H0Y539|H0Y539_HUMAN:tr|X6R6D0|X6R6D0_HUMAN	Phosphorylation (STY)	Y7:Phosphorylation (STY):17.01	PEAKS DB
VGEEEHVY(+79.97)SFPNK	60.96	1613.68	13	2.2	807.847	20.37	304000	348000	281000	152000	140000		2	F2:7662	3P_AZD_2uM_1D_Ppetide_Tyr_IP_CTL2.raw	5	1	1	1	1	1	0	tr|F5GZ78|F5GZ78_HUMAN:sp|P49023|PAXI_HUMAN:tr|A0A1B0GTU4|A0A1B0GTU4_HUMAN:tr|A0A1B0GU60|A0A1B0GU60_HUMAN:tr|F5H836|F5H836_HUMAN	Phosphorylation (STY)	Y8:Phosphorylation (STY):26.02	PEAKS DB
GQEGEY(+79.97)AVPFDAVAR	60.37	1687.72	15	1.3	844.87	42.82	315000	338000	301000	86700	103000	96800	1	F1:16989	3P_AZD_2uM_1D_Ppetide_Tyr_IP_CTL1.raw	6	1	1	1	1	1	1	sp|O60496|DOK2_HUMAN	Phosphorylation (STY)	Y6:Phosphorylation (STY):1000.00	PEAKS DB
YSEEGVY(+79.97)NVQYSFIK	60.27	1904.82	15	0.7	953.42	47.32	147000	164000	263000	83500	61500		3	F3:19139	3P_AZD_2uM_1D_Ppetide_Tyr_IP_CTL3.raw	5	1	1	1	1	1	0	sp|Q9NUJ1|ABHDA_HUMAN	Phosphorylation (STY)	Y7:Phosphorylation (STY):28.13	PEAKS DB
QADSEMTGY(+79.97)VVTR	60.02	1535.63	13	2.1	768.825	24.08	241000	337000	286000				1	F1:9272	3P_AZD_2uM_1D_Ppetide_Tyr_IP_CTL1.raw	3	1	1	1	0	0	0	sp|P53778|MK12_HUMAN:tr|B5MDL5|B5MDL5_HUMAN	Phosphorylation (STY)	Y9:Phosphorylation (STY):26.31	PEAKS DB
NDY(+79.97)ESISDLQQGR	59.3	1603.65	13	1.1	802.834	27.45	79100	78600	109000		43900	35500	2	F2:11022	3P_AZD_2uM_1D_Ppetide_Tyr_IP_CTL2.raw	5	1	1	1	0	1	1	sp|Q9NWQ8|PHAG1_HUMAN	Phosphorylation (STY)	Y3:Phosphorylation (STY):54.01	PEAKS DB
SHNSALY(+79.97)SQVQK	59.07	1440.64	12	1.9	721.329	12.23	69600	171000	141000	59700	38600	57700	1	F1:3581	3P_AZD_2uM_1D_Ppetide_Tyr_IP_CTL1.raw	6	1	1	1	1	1	1	sp|Q99704|DOK1_HUMAN	Phosphorylation (STY)	Y7:Phosphorylation (STY):30.46	PEAKS DB
NEEENIY(+79.97)SVPHDSTQGK	58.66	2025.83	17	1.5	676.285	17.79	896000	1040000	838000	305000	306000		1	F1:6234	3P_AZD_2uM_1D_Ppetide_Tyr_IP_CTL1.raw	5	1	1	1	1	1	0	sp|Q9NRY4|RHG35_HUMAN	Phosphorylation (STY)	Y7:Phosphorylation (STY):17.01	PEAKS DB
YVLDDQY(+79.97)TSSSGAK	58.14	1612.67	14	1.3	807.341	21.4	877000	1260000	855000				3	F3:8017	3P_AZD_2uM_1D_Ppetide_Tyr_IP_CTL3.raw	3	1	1	1	0	0	0	sp|P42680|TEC_HUMAN	Phosphorylation (STY)	Y7:Phosphorylation (STY):17.01	PEAKS DB
VHTDFTPSPY(+79.97)DHDSLK	56.29	1937.82	16	2.1	646.948	21.97	150000	202000	186000		24400		2	F2:8470	3P_AZD_2uM_1D_Ppetide_Tyr_IP_CTL2.raw	4	1	1	1	0	1	0	sp|O75995|SASH3_HUMAN	Phosphorylation (STY)	Y10:Phosphorylation (STY):15.39	PEAKS DB
HPYFYAPELLY(+79.97)YANK	56.16	1967.89	15	2.8	984.953	55.42				131000	79000	53900	6	F6:20778	3P_AZD_2uM_1D_Ppetide_Tyr_IP_AZD3.raw	4	0	0	0	2	1	1		Phosphorylation (STY)	Y11:Phosphorylation (STY):17.01	PEAKS DB
IEDVGS(+79.97)DEEDDSGK	55.97	1573.57	14	1.1	787.792	14.3	201000	238000	206000				3	F3:4640	3P_AZD_2uM_1D_Ppetide_Tyr_IP_CTL3.raw	3	1	1	1	0	0	0	sp|P08238|HS90B_HUMAN	Phosphorylation (STY)	S6:Phosphorylation (STY):62.39	PEAKS DB
GEPNVSY(+79.97)IC(+57.02)SR	55.93	1360.55	11	1.5	681.282	24.92	16900000	21700000	17200000	2020000	1640000	1700000	2	F2:9879	3P_AZD_2uM_1D_Ppetide_Tyr_IP_CTL2.raw	6	1	1	1	1	1	1	sp|P49840|GSK3A_HUMAN:tr|A8MT37|A8MT37_HUMAN:sp|P49841|GSK3B_HUMAN:tr|A0A3B3ITW1|A0A3B3ITW1_HUMAN	Phosphorylation (STY); Carbamidomethylation	Y7:Phosphorylation (STY):27.96;C9:Carbamidomethylation:1000.00	PEAKS DB
LY(+79.97)DLNMPAYVK	55.76	1405.64	11	1.5	703.826	46.16	598000	651000	695000	11600			1	F1:18154	3P_AZD_2uM_1D_Ppetide_Tyr_IP_CTL1.raw	4	1	1	1	1	0	0	sp|P16333|NCK1_HUMAN:tr|C9K098|C9K098_HUMAN:tr|C9JVV5|C9JVV5_HUMAN:tr|H7C5C7|H7C5C7_HUMAN:tr|C9J869|C9J869_HUMAN:tr|C9JAB9|C9JAB9_HUMAN	Phosphorylation (STY)	Y2:Phosphorylation (STY):161.52	PEAKS DB
ENDY(+79.97)ESISDLQQGR	55.21	1732.69	14	1.4	867.356	28.35	84800	109000	94800	43800			2	F2:11415	3P_AZD_2uM_1D_Ppetide_Tyr_IP_CTL2.raw	4	1	1	1	1	0	0	sp|Q9NWQ8|PHAG1_HUMAN	Phosphorylation (STY)	Y4:Phosphorylation (STY):32.28	PEAKS DB
FYAPELLYY(+79.97)ANK	55.01	1570.71	12	1.5	786.364	54.15	82500	85000	145000				2	F2:21076	3P_AZD_2uM_1D_Ppetide_Tyr_IP_CTL2.raw	3	1	1	1	0	0	0		Phosphorylation (STY)	Y9:Phosphorylation (STY):17.01	PEAKS DB
LSLEGDHSTPPSAY(+79.97)GSVK	54.2	1923.86	18	1.4	962.939	25.39	271000	259000	314000	134000			3	F3:9885	3P_AZD_2uM_1D_Ppetide_Tyr_IP_CTL3.raw	5	1	1	1	2	0	0	sp|P07355|ANXA2_HUMAN	Phosphorylation (STY)	Y14:Phosphorylation (STY):9.40	PEAKS DB
AVDGY(+79.97)VKPQIK	53.21	1296.65	11	1.5	649.332	17.93	268000	400000	298000	110000	86800	100000	1	F1:6322	3P_AZD_2uM_1D_Ppetide_Tyr_IP_CTL1.raw	6	1	1	1	1	1	1	tr|K7EK35|K7EK35_HUMAN:sp|P42229|STA5A_HUMAN:sp|P51692|STA5B_HUMAN	Phosphorylation (STY)	Y5:Phosphorylation (STY):1000.00	PEAKS DB
ELFDDPS(+79.97)YVNVQNLDK	52.63	1974.86	16	1.1	988.439	50.23			63900	44800			3	F3:20087	3P_AZD_2uM_1D_Ppetide_Tyr_IP_CTL3.raw	2	0	0	1	1	0	0	sp|P29353|SHC1_HUMAN:tr|Q5T188|Q5T188_HUMAN:tr|H0Y539|H0Y539_HUMAN:tr|X6R6D0|X6R6D0_HUMAN	Phosphorylation (STY)	S7:Phosphorylation (STY):0.00	PEAKS DB
HTDDEMT(+79.97)GY(+79.97)VATR	51.43	1654.57	13	1.8	828.295	17.84	268000	309000	230000				3	F3:6345	3P_AZD_2uM_1D_Ppetide_Tyr_IP_CTL3.raw	3	1	1	1	0	0	0	sp|Q16539|MK14_HUMAN:tr|B4E0K5|B4E0K5_HUMAN:tr|E7EX54|E7EX54_HUMAN	Phosphorylation (STY)	T7:Phosphorylation (STY):25.58;Y9:Phosphorylation (STY):19.05	PEAKS DB
ALPAQVDDPPEPVY(+79.97)ANIERQPR	51.41	2554.22	22	2.5	852.417	40.08				3770000	3060000	2470000	4	F4:15388	3P_AZD_2uM_1D_Ppetide_Tyr_IP_AZD1.raw	3	0	0	0	1	1	1	tr|E9PNT2|E9PNT2_HUMAN	Phosphorylation (STY)	Y14:Phosphorylation (STY):1000.00	PEAKS DB
IADPEHDHTGFLTEY(+79.97)VATR	51.13	2250.99	19	1	751.34	36.13	424000	462000	510000				1	F1:14243	3P_AZD_2uM_1D_Ppetide_Tyr_IP_CTL1.raw	3	1	1	1	0	0	0	tr|E9PJF0|E9PJF0_HUMAN:tr|E9PQW4|E9PQW4_HUMAN:sp|P27361|MK03_HUMAN	Phosphorylation (STY)	Y15:Phosphorylation (STY):13.38	PEAKS DB
ES(+79.97)EDKPEIEDVGSDEEEEKKDGDK	51.07	2815.14	24	2.2	704.795	15.45			922000				3	F3:5173	3P_AZD_2uM_1D_Ppetide_Tyr_IP_CTL3.raw	1	0	0	1	0	0	0	sp|P07900|HS90A_HUMAN	Phosphorylation (STY)	S2:Phosphorylation (STY):0.00	PEAKS DB
LC(+57.02)DFGSASHVADNDITPY(+79.97)LVSR	50.86	2516.1	22	1.5	839.71	46.74	154000	189000	499000	1880000		1480000	3	F3:18935	3P_AZD_2uM_1D_Ppetide_Tyr_IP_CTL3.raw	5	1	1	1	1	0	1	sp|Q13523|PRP4B_HUMAN:tr|H0YDJ3|H0YDJ3_HUMAN	Carbamidomethylation; Phosphorylation (STY)	C2:Carbamidomethylation:1000.00;Y18:Phosphorylation (STY):14.04	PEAKS DB
AEEDEILNRS(+79.97)PR	50.59	1507.67	12	2	754.842	19.63	917000	1010000	813000	92700		99000	2	F2:7298	3P_AZD_2uM_1D_Ppetide_Tyr_IP_CTL2.raw	8	2	2	2	1	0	1	sp|P27824|CALX_HUMAN	Phosphorylation (STY)	S10:Phosphorylation (STY):1000.00	PEAKS DB
SREEDPTLTEEEISAM(+15.99)Y(+79.97)SSVNKPGQLVNK	50.11	3346.53	29	1.5	1116.52	35.68				964000	356000		5	F5:12843	3P_AZD_2uM_1D_Ppetide_Tyr_IP_AZD2.raw	3	0	0	0	2	1	0	sp|Q9NWQ8|PHAG1_HUMAN	Oxidation (M); Phosphorylation (STY)	M16:Oxidation (M):1000.00;Y17:Phosphorylation (STY):14.02	PEAKS DB
SVDGDQGLGMEGPY(+79.97)EVLK	49.49	1972.85	18	1.9	987.434	47.26	148000	145000	155000				1	F1:18517	3P_AZD_2uM_1D_Ppetide_Tyr_IP_CTL1.raw	3	1	1	1	0	0	0	sp|Q9NWQ8|PHAG1_HUMAN	Phosphorylation (STY)	Y14:Phosphorylation (STY):38.29	PEAKS DB
AY(+79.97)TNFDAER	49.4	1165.44	9	0.2	583.729	17.57	215000	232000	200000				1	F1:6154	3P_AZD_2uM_1D_Ppetide_Tyr_IP_CTL1.raw	3	1	1	1	0	0	0	sp|P07355|ANXA2_HUMAN	Phosphorylation (STY)	Y2:Phosphorylation (STY):40.00	PEAKS DB
SS(+79.97)LSGDEEDELFKGATLK	49.39	2004.89	18	1	1003.45	44				322000			4	F4:17100	3P_AZD_2uM_1D_Ppetide_Tyr_IP_AZD1.raw	1	0	0	0	1	0	0	sp|Q5T1M5|FKB15_HUMAN:tr|A0A0A0MT60|A0A0A0MT60_HUMAN	Phosphorylation (STY)	S2:Phosphorylation (STY):0.00	PEAKS DB
A(+42.01)ASAAAASAAAASAASGS(+79.97)PGPGEGSAGGEKR	49.19	2664.18	31	2.2	889.068	34.35				598000			4	F4:12830	3P_AZD_2uM_1D_Ppetide_Tyr_IP_AZD1.raw	1	0	0	0	1	0	0	sp|Q13263|TIF1B_HUMAN	Acetylation (Protein N-term); Phosphorylation (STY)	A1:Acetylation (Protein N-term):1000.00;S18:Phosphorylation (STY):9.40	PEAKS DB
VKEEGYELPYNPATDDY(+79.97)AVPPPR	48.89	2699.22	23	6.2	900.751	43.15			498000	107000		60700	3	F3:17694	3P_AZD_2uM_1D_Ppetide_Tyr_IP_CTL3.raw	3	0	0	1	1	0	1	sp|Q99704|DOK1_HUMAN	Phosphorylation (STY)	Y17:Phosphorylation (STY):16.66	PEAKS DB
APDFVFY(+79.97)APR	48.71	1261.55	10	0.3	631.784	48.73	59300	60200	59000				1	F1:18969	3P_AZD_2uM_1D_Ppetide_Tyr_IP_CTL1.raw	3	1	1	1	0	0	0	sp|P26038|MOES_HUMAN:sp|P15311|EZRI_HUMAN:tr|E7EQR4|E7EQR4_HUMAN:tr|A0A2R8Y7M3|A0A2R8Y7M3_HUMAN:sp|P35241|RADI_HUMAN:tr|A0A2R8Y5S7|A0A2R8Y5S7_HUMAN	Phosphorylation (STY)	Y7:Phosphorylation (STY):1000.00	PEAKS DB
VADPDHDHTGFLTEY(+79.97)VATR	48.5	2222.96	19	0.4	741.995	33.91		1540000	1510000	286000	250000		3	F3:13607	3P_AZD_2uM_1D_Ppetide_Tyr_IP_CTL3.raw	4	0	1	1	1	1	0	sp|P28482|MK01_HUMAN	Phosphorylation (STY)	Y15:Phosphorylation (STY):10.22	PEAKS DB
VFDKDGN(+.98)GY(+79.97)ISAAELR	48.5	1834.81	16	2.6	918.417	35.25	150000	167000	163000				1	F1:13866	3P_AZD_2uM_1D_Ppetide_Tyr_IP_CTL1.raw	3	1	1	1	0	0	0	sp|P0DP24|CALM2_HUMAN:sp|P0DP23|CALM1_HUMAN:sp|P0DP25|CALM3_HUMAN:tr|E7ETZ0|E7ETZ0_HUMAN	Deamidation (NQ); Phosphorylation (STY)	N7:Deamidation (NQ):1000.00;Y9:Phosphorylation (STY):22.85	PEAKS DB
TKPSDEEMLFIY(+79.97)GHYK	48.45	2036.9	16	2.7	679.974	39.04	117000	122000	145000				3	F3:15930	3P_AZD_2uM_1D_Ppetide_Tyr_IP_CTL3.raw	3	1	1	1	0	0	0	sp|P07108|ACBP_HUMAN:tr|B8ZWD1|B8ZWD1_HUMAN:tr|A0A0A0MTI5|A0A0A0MTI5_HUMAN	Phosphorylation (STY)	Y12:Phosphorylation (STY):14.84	PEAKS DB
RKPSVPDSASPADDSFVDPGERLY(+79.97)DLNMPAYVK	47.45	3715.72	33	1.8	929.94	48.41				149000	130000	137000	5	F5:18233	3P_AZD_2uM_1D_Ppetide_Tyr_IP_AZD2.raw	3	0	0	0	1	1	1	sp|P16333|NCK1_HUMAN:tr|C9K098|C9K098_HUMAN:tr|C9JVV5|C9JVV5_HUMAN:tr|H7C5C7|H7C5C7_HUMAN:tr|C9J869|C9J869_HUMAN:tr|C9JAB9|C9JAB9_HUMAN	Phosphorylation (STY)	Y24:Phosphorylation (STY):7.81	PEAKS DB
ESEDKPEIEDVGS(+79.97)DEEEEKK	47.19	2399.97	20	0.5	800.999	17.18	248000	341000	262000				1	F1:5948	3P_AZD_2uM_1D_Ppetide_Tyr_IP_CTL1.raw	3	1	1	1	0	0	0	sp|P07900|HS90A_HUMAN	Phosphorylation (STY)	S13:Phosphorylation (STY):23.95	PEAKS DB
ATQPEPIY(+79.97)AESTK	47.06	1513.67	13	1	757.843	19.77	522000	515000	479000	83000	78800		2	F2:7349	3P_AZD_2uM_1D_Ppetide_Tyr_IP_CTL2.raw	5	1	1	1	1	1	0	sp|Q86YV5|PRAG1_HUMAN	Phosphorylation (STY)	Y8:Phosphorylation (STY):24.24	PEAKS DB
GHGQPGADAEKPFY(+79.97)VNVEFHHER	46.79	2700.19	23	1.1	676.055	27.25				165000	144000	142000	5	F5:9475	3P_AZD_2uM_1D_Ppetide_Tyr_IP_AZD2.raw	3	0	0	0	1	1	1	sp|P11274|BCR_HUMAN	Phosphorylation (STY)	Y14:Phosphorylation (STY):1000.00	PEAKS DB
EEPEALY(+79.97)AAVNK	46.54	1412.62	12	0.5	707.319	32.26	329000	366000	358000	96600	90700	81400	3	F3:13016	3P_AZD_2uM_1D_Ppetide_Tyr_IP_CTL3.raw	6	1	1	1	1	1	1	tr|A0A087WVF7|A0A087WVF7_HUMAN:sp|Q9NZM3|ITSN2_HUMAN	Phosphorylation (STY)	Y7:Phosphorylation (STY):1000.00	PEAKS DB
SVDGDQGLGM(+15.99)EGPY(+79.97)EVLK	46.27	1988.84	18	-0.2	995.429	40.2	172000	175000	186000				3	F3:16433	3P_AZD_2uM_1D_Ppetide_Tyr_IP_CTL3.raw	3	1	1	1	0	0	0	sp|Q9NWQ8|PHAG1_HUMAN	Oxidation (M); Phosphorylation (STY)	M10:Oxidation (M):1000.00;Y14:Phosphorylation (STY):49.75	PEAKS DB
SES(+79.97)PKEPEQLR	46.05	1378.61	11	0.9	690.314	14.03	267000	255000	240000	79200	0	65900	2	F2:4621	3P_AZD_2uM_1D_Ppetide_Tyr_IP_CTL2.raw	5	1	1	1	1	0	1	tr|F8W6I7|F8W6I7_HUMAN:sp|P09651|ROA1_HUMAN	Phosphorylation (STY)	S3:Phosphorylation (STY):18.53	PEAKS DB
APELLYY(+79.97)ANK	46	1260.58	10	-0.1	631.297	36.18	193000	229000	232000				3	F3:14638	3P_AZD_2uM_1D_Ppetide_Tyr_IP_CTL3.raw	3	1	1	1	0	0	0		Phosphorylation (STY)	Y7:Phosphorylation (STY):17.01	PEAKS DB
S(+79.97)QEMVHLVNK	45.1	1263.57	10	-0.7	632.791	22.26	73900	119000					2	F2:8636	3P_AZD_2uM_1D_Ppetide_Tyr_IP_CTL2.raw	2	1	1	0	0	0	0	sp|P16070|CD44_HUMAN:tr|H0YD13|H0YD13_HUMAN	Phosphorylation (STY)	S1:Phosphorylation (STY):1000.00	PEAKS DB
SAEEAPLY(+79.97)SKVTPR	44.76	1626.77	14	2	814.392	21.79				537000	314000	312000	6	F6:7352	3P_AZD_2uM_1D_Ppetide_Tyr_IP_AZD3.raw	4	0	0	0	2	1	1	tr|E7EMB8|E7EMB8_HUMAN:sp|Q99952|PTN18_HUMAN	Phosphorylation (STY)	Y8:Phosphorylation (STY):17.01	PEAKS DB
S(+79.97)SLSGDEEDELFKGATLK	44.48	2004.89	18	1.6	1003.46	43.87					335000	344000	5	F5:16342	3P_AZD_2uM_1D_Ppetide_Tyr_IP_AZD2.raw	2	0	0	0	0	1	1	sp|Q5T1M5|FKB15_HUMAN:tr|A0A0A0MT60|A0A0A0MT60_HUMAN	Phosphorylation (STY)	S1:Phosphorylation (STY):0.00	PEAKS DB
SQNNIY(+79.97)SAC(+57.02)PR	44.43	1388.55	11	1.3	695.285	13.82				79100	85600	73000	6	F6:4157	3P_AZD_2uM_1D_Ppetide_Tyr_IP_AZD3.raw	3	0	0	0	1	1	1	sp|O60667|FAIM3_HUMAN	Phosphorylation (STY); Carbamidomethylation	Y6:Phosphorylation (STY):17.01;C9:Carbamidomethylation:1000.00	PEAKS DB
VIEDNEY(+79.97)TAR	43.72	1288.53	10	0.5	645.274	13.19	2980000	3420000	3150000	714000	838000	713000	2	F2:4182	3P_AZD_2uM_1D_Ppetide_Tyr_IP_CTL2.raw	6	1	1	1	1	1	1	sp|P07948|LYN_HUMAN:tr|H0Y3C5|H0Y3C5_HUMAN:sp|P08631|HCK_HUMAN:tr|F6SF04|F6SF04_HUMAN:tr|J3KPD6|J3KPD6_HUMAN	Phosphorylation (STY)	Y7:Phosphorylation (STY):17.01	PEAKS DB
LY(+79.97)DLNM(+15.99)PAYVK	43.08	1421.63	11	2.8	711.824	33.56	411000	449000	502000				2	F2:13759	3P_AZD_2uM_1D_Ppetide_Tyr_IP_CTL2.raw	3	1	1	1	0	0	0	sp|P16333|NCK1_HUMAN:tr|C9K098|C9K098_HUMAN:tr|C9JVV5|C9JVV5_HUMAN:tr|H7C5C7|H7C5C7_HUMAN:tr|C9J869|C9J869_HUMAN:tr|C9JAB9|C9JAB9_HUMAN	Phosphorylation (STY); Oxidation (M)	Y2:Phosphorylation (STY):72.07;M6:Oxidation (M):1000.00	PEAKS DB
YAPELLY(+79.97)YANK	42.54	1423.64	11	0.9	712.829	47.48	429000		430000				3	F3:19187	3P_AZD_2uM_1D_Ppetide_Tyr_IP_CTL3.raw	2	1	0	1	0	0	0		Phosphorylation (STY)	Y7:Phosphorylation (STY):33.98	PEAKS DB
SIY(+79.97)YITGESK	42.53	1239.54	10	1.9	620.78	29.23	64100	90500	73500				1	F1:11447	3P_AZD_2uM_1D_Ppetide_Tyr_IP_CTL1.raw	3	1	1	1	0	0	0	sp|P08238|HS90B_HUMAN	Phosphorylation (STY)	Y3:Phosphorylation (STY):30.46	PEAKS DB
STTTGHLIY(+79.97)K	42.19	1199.56	10	0	600.787	14.28	61000						1	F1:4572	3P_AZD_2uM_1D_Ppetide_Tyr_IP_CTL1.raw	1	1	0	0	0	0	0	sp|P68104|EF1A1_HUMAN	Phosphorylation (STY)	Y9:Phosphorylation (STY):38.32	PEAKS DB
APELLY(+79.97)YANK	42.11	1260.58	10	-1	631.296	42.29	942000	1010000	956000	0	0		4	F4:16320	3P_AZD_2uM_1D_Ppetide_Tyr_IP_AZD1.raw	3	1	1	1	0	0	0		Phosphorylation (STY)	Y6:Phosphorylation (STY):27.96	PEAKS DB
SAEEAPLY(+79.97)SK	41.55	1173.5	10	0.4	587.755	16.07	294000	371000	307000	543000	501000	447000	2	F2:5618	3P_AZD_2uM_1D_Ppetide_Tyr_IP_CTL2.raw	6	1	1	1	1	1	1	tr|E7EMB8|E7EMB8_HUMAN:sp|Q99952|PTN18_HUMAN	Phosphorylation (STY)	Y8:Phosphorylation (STY):11.06	PEAKS DB
FAS(+79.97)DDEHDEHDENGATGPVK	41.46	2248.85	20	2.2	750.627	14.38	113000	115000					1	F1:4606	3P_AZD_2uM_1D_Ppetide_Tyr_IP_CTL1.raw	2	1	1	0	0	0	0	sp|P05455|LA_HUMAN	Phosphorylation (STY)	S3:Phosphorylation (STY):7.38	PEAKS DB
AQEPVSGC(+57.02)GSPEQDPQKQAEEERQEEPEY(+79.97)ENVVPISRPPEP	41.04	4725.08	41	0.2	1182.28	38.78				780000	537000	545000	5	F5:14071	3P_AZD_2uM_1D_Ppetide_Tyr_IP_AZD2.raw	3	0	0	0	1	1	1	tr|A0A0A0MR54|A0A0A0MR54_HUMAN:sp|Q14162|SREC_HUMAN	Carbamidomethylation; Phosphorylation (STY)	C8:Carbamidomethylation:1000.00;Y29:Phosphorylation (STY):6.30	PEAKS DB
EPNVSY(+79.97)IC(+57.02)SR	41.02	1303.53	10	1.7	652.772	24.08	1090000	1530000	1220000	225000	172000	204000	1	F1:9281	3P_AZD_2uM_1D_Ppetide_Tyr_IP_CTL1.raw	6	1	1	1	1	1	1	sp|P49840|GSK3A_HUMAN:tr|A8MT37|A8MT37_HUMAN:sp|P49841|GSK3B_HUMAN:tr|A0A3B3ITW1|A0A3B3ITW1_HUMAN	Phosphorylation (STY); Carbamidomethylation	Y6:Phosphorylation (STY):17.01;C8:Carbamidomethylation:1000.00	PEAKS DB
FYAPELLY(+79.97)YANK	40.84	1570.71	12	1.9	786.364	55.92	176000	202000	333000				1	F1:20732	3P_AZD_2uM_1D_Ppetide_Tyr_IP_CTL1.raw	3	1	1	1	0	0	0		Phosphorylation (STY)	Y8:Phosphorylation (STY):10.11	PEAKS DB
AGDLLEDS(+79.97)PKRPK	40.78	1504.73	13	1	502.584	15.01	345000	402000	345000	315000	235000	298000	3	F3:4961	3P_AZD_2uM_1D_Ppetide_Tyr_IP_CTL3.raw	6	1	1	1	1	1	1	sp|P51858|HDGF_HUMAN	Phosphorylation (STY)	S8:Phosphorylation (STY):1000.00	PEAKS DB
LIEDNEY(+79.97)TAR	40.33	1302.55	10	1.4	652.283	16.16	564000	699000	553000	185000	159000	174000	2	F2:5638	3P_AZD_2uM_1D_Ppetide_Tyr_IP_CTL2.raw	6	1	1	1	1	1	1	sp|P06241|FYN_HUMAN:sp|P07947|YES_HUMAN:tr|J3QRU1|J3QRU1_HUMAN:sp|P12931|SRC_HUMAN	Phosphorylation (STY)	Y7:Phosphorylation (STY):12.28	PEAKS DB
IGEGTY(+79.97)GVVYK	40.05	1264.57	11	0.9	633.295	26.51	1340000	1590000	1400000	260000	240000	242000	3	F3:10337	3P_AZD_2uM_1D_Ppetide_Tyr_IP_CTL3.raw	6	1	1	1	1	1	1	sp|P24941|CDK2_HUMAN:tr|G3V5T9|G3V5T9_HUMAN:tr|K7ELV5|K7ELV5_HUMAN:sp|Q00526|CDK3_HUMAN:tr|E5RIU6|E5RIU6_HUMAN:tr|A0A087WZZ9|A0A087WZZ9_HUMAN:tr|E7ESI2|E7ESI2_HUMAN:sp|P06493|CDK1_HUMAN:tr|A0A024QZP7|A0A024QZP7_HUMAN:tr|G3V317|G3V317_HUMAN	Phosphorylation (STY)	Y6:Phosphorylation (STY):17.01	PEAKS DB
AEFAEY(+79.97)ASVDR	39.94	1336.53	11	0.7	669.274	26.4	96500	114000	109000	86200	67400	66900	5	F5:9194	3P_AZD_2uM_1D_Ppetide_Tyr_IP_AZD2.raw	6	1	1	1	1	1	1	sp|Q9NWQ8|PHAG1_HUMAN	Phosphorylation (STY)	Y6:Phosphorylation (STY):22.85	PEAKS DB
LEDYFTATEPQY(+79.97)QPGENL	39.89	2193.91	18	3.3	1097.97	54.44		121000	264000				2	F2:21157	3P_AZD_2uM_1D_Ppetide_Tyr_IP_CTL2.raw	2	0	1	1	0	0	0	sp|P06241|FYN_HUMAN:sp|P07947|YES_HUMAN:tr|J3QRU1|J3QRU1_HUMAN	Phosphorylation (STY)	Y12:Phosphorylation (STY):18.33	PEAKS DB
HGNRNSNSYGIPEPAHAYAQPQT(+79.97)TTPLPAVSGSPGAAITPLPSTQNGPVFAK	39.82	5345.59	52	3	1337.41	49.64					0		5	F5:18765	3P_AZD_2uM_1D_Ppetide_Tyr_IP_AZD2.raw	0	0	0	0	0	0	0	sp|P46109|CRKL_HUMAN	Phosphorylation (STY)	T23:Phosphorylation (STY):0.00	PEAKS DB
RKPSVPDSASPADDSFVDPGERLY(+79.97)DLNM(+15.99)PAYVK	39.61	3731.72	33	0.8	933.937	43.41				144000		93600	4	F4:16841	3P_AZD_2uM_1D_Ppetide_Tyr_IP_AZD1.raw	2	0	0	0	1	0	1	sp|P16333|NCK1_HUMAN:tr|C9K098|C9K098_HUMAN:tr|C9JVV5|C9JVV5_HUMAN:tr|H7C5C7|H7C5C7_HUMAN:tr|C9J869|C9J869_HUMAN:tr|C9JAB9|C9JAB9_HUMAN	Phosphorylation (STY); Oxidation (M)	Y24:Phosphorylation (STY):5.16;M28:Oxidation (M):1000.00	PEAKS DB
VDY(+79.97)VQVDEQK	39.04	1301.55	10	0.7	651.785	17.93	25100	46000					2	F2:6517	3P_AZD_2uM_1D_Ppetide_Tyr_IP_CTL2.raw	2	1	1	0	0	0	0	sp|Q8WWW8|GAB3_HUMAN	Phosphorylation (STY)	Y3:Phosphorylation (STY):1000.00	PEAKS DB
SES(+79.97)PKEPEQLRK	38.95	1506.71	12	1.4	503.244	11.09				183000	154000	164000	5	F5:2879	3P_AZD_2uM_1D_Ppetide_Tyr_IP_AZD2.raw	3	0	0	0	1	1	1	tr|F8W6I7|F8W6I7_HUMAN:sp|P09651|ROA1_HUMAN	Phosphorylation (STY)	S3:Phosphorylation (STY):14.63	PEAKS DB
A(+42.01)S(+79.97)GVAVSDGVIK	38.94	1223.58	12	1	612.798	42.89	438000	460000	445000	92200	90800	96700	1	F1:17027	3P_AZD_2uM_1D_Ppetide_Tyr_IP_CTL1.raw	6	1	1	1	1	1	1	sp|P23528|COF1_HUMAN	Acetylation (Protein N-term); Phosphorylation (STY)	A1:Acetylation (Protein N-term):1000.00;S2:Phosphorylation (STY):84.49	PEAKS DB
LC(+57.02)DFGSASHVADN(+.98)DITPY(+79.97)LVSR	38.39	2517.09	22	1.9	840.038	47.12	99600	116000	292000	266000	260000		5	F5:17689	3P_AZD_2uM_1D_Ppetide_Tyr_IP_AZD2.raw	6	1	1	1	1	2	0	sp|Q13523|PRP4B_HUMAN:tr|H0YDJ3|H0YDJ3_HUMAN	Carbamidomethylation; Deamidation (NQ); Phosphorylation (STY)	C2:Carbamidomethylation:1000.00;N13:Deamidation (NQ):1000.00;Y18:Phosphorylation (STY):3.64	PEAKS DB
KLEKEEEEGISQES(+79.97)SEEEQ	38.35	2315.95	19	3.4	1158.99	14.46					72400		5	F5:4405	3P_AZD_2uM_1D_Ppetide_Tyr_IP_AZD2.raw	1	0	0	0	0	1	0	sp|P17096|HMGA1_HUMAN	Phosphorylation (STY)	S14:Phosphorylation (STY):0.00	PEAKS DB
TVC(+57.02)STY(+79.97)LQSR	38.2	1293.54	10	1	647.779	16.41	143000	142000	109000				2	F2:5790	3P_AZD_2uM_1D_Ppetide_Tyr_IP_CTL2.raw	3	1	1	1	0	0	0	sp|Q9H422|HIPK3_HUMAN	Carbamidomethylation; Phosphorylation (STY)	C3:Carbamidomethylation:1000.00;Y6:Phosphorylation (STY):21.94	PEAKS DB
ASVNRGAQ(+.98)ENGTGQAT(+79.97)SRNGHSARQ(+.98)HVVADTEL	37.86	3499.58	33	2.1	875.905	16.54					3420000		5	F5:5385	3P_AZD_2uM_1D_Ppetide_Tyr_IP_AZD2.raw	1	0	0	0	0	1	0	sp|P28906|CD34_HUMAN	Deamidation (NQ); Phosphorylation (STY)	Q8:Deamidation (NQ):0.00;T16:Phosphorylation (STY):0.00;Q25:Deamidation (NQ):0.00	PEAKS DB
NEGNLENEGKPEDEVEPDDEGKS(+79.97)DEEEKPDVEGK	37.75	3864.59	34	3	967.157	19.82		158000					2	F2:7430	3P_AZD_2uM_1D_Ppetide_Tyr_IP_CTL2.raw	1	0	1	0	0	0	0	sp|Q969E4|TCAL3_HUMAN	Phosphorylation (STY)	S23:Phosphorylation (STY):1000.00	PEAKS DB
HGNRNSNSYGIPEPAHAY(+79.97)AQ(+.98)PQTTTPLPAVSGSPGAAITPLPSTQNGPVFAK	37.59	5346.57	52	7.5	1337.66	49.63					21200		5	F5:18765	3P_AZD_2uM_1D_Ppetide_Tyr_IP_AZD2.raw	1	0	0	0	0	1	0	sp|P46109|CRKL_HUMAN	Phosphorylation (STY); Deamidation (NQ)	Y18:Phosphorylation (STY):0.00;Q20:Deamidation (NQ):0.00	PEAKS DB
FTATEPQY(+79.97)QPGENL	37.26	1673.7	14	1	837.857	38.69	5070000		7260000		652000	780000	3	F3:15695	3P_AZD_2uM_1D_Ppetide_Tyr_IP_CTL3.raw	4	1	0	1	0	1	1	sp|P06241|FYN_HUMAN:sp|P07947|YES_HUMAN:tr|J3QRU1|J3QRU1_HUMAN	Phosphorylation (STY)	Y8:Phosphorylation (STY):31.27	PEAKS DB
REEPEALY(+79.97)AAVNK	36.99	1568.72	13	0.5	785.369	25.42	1320000	1480000	1280000	572000	526000		3	F3:9899	3P_AZD_2uM_1D_Ppetide_Tyr_IP_CTL3.raw	5	1	1	1	1	1	0	tr|A0A087WVF7|A0A087WVF7_HUMAN:sp|Q9NZM3|ITSN2_HUMAN	Phosphorylation (STY)	Y8:Phosphorylation (STY):1000.00	PEAKS DB
GS(+79.97)EVS(+79.97)ALLGRIPSAVGYQPTLATDMGTMQER	36.87	3394.53	31	-6.3	1132.51	46.17			170000				3	F3:18750	3P_AZD_2uM_1D_Ppetide_Tyr_IP_CTL3.raw	1	0	0	1	0	0	0	sp|P06576|ATPB_HUMAN	Phosphorylation (STY)	S2:Phosphorylation (STY):7.03;S5:Phosphorylation (STY):8.28	PEAKS DB
YAPELLYY(+79.97)ANK	36.6	1423.64	11	2	712.83	43.21	82700	79100	78000				2	F2:17822	3P_AZD_2uM_1D_Ppetide_Tyr_IP_CTL2.raw	3	1	1	1	0	0	0		Phosphorylation (STY)	Y8:Phosphorylation (STY):17.01	PEAKS DB
A(+42.01)ASAAAASAAAAS(+79.97)AASGSPGPGEGSAGGEKR	36.49	2664.18	31	2	889.068	34.49					413000		5	F5:12324	3P_AZD_2uM_1D_Ppetide_Tyr_IP_AZD2.raw	1	0	0	0	0	1	0	sp|Q13263|TIF1B_HUMAN	Acetylation (Protein N-term); Phosphorylation (STY)	A1:Acetylation (Protein N-term):1000.00;S13:Phosphorylation (STY):0.00	PEAKS DB
S(+79.97)SPEQPRPSTSK	36.44	1379.61	12	1.7	690.812	7.14		114000	106000				3	F3:1491	3P_AZD_2uM_1D_Ppetide_Tyr_IP_CTL3.raw	2	0	1	1	0	0	0	sp|P29590|PML_HUMAN	Phosphorylation (STY)	S1:Phosphorylation (STY):0.00	PEAKS DB
KGHGQPGADAEKPFY(+79.97)VNVEFHHER	36.41	2828.28	24	1	566.664	23.3				116000	106000		4	F4:8154	3P_AZD_2uM_1D_Ppetide_Tyr_IP_AZD1.raw	2	0	0	0	1	1	0	sp|P11274|BCR_HUMAN	Phosphorylation (STY)	Y15:Phosphorylation (STY):1000.00	PEAKS DB
A(+42.01)ASAAAAS(+79.97)AAAASAASGSPGPGEGSAGGEKR	36.23	2664.18	31	2	889.068	34.38						377000	6	F6:12167	3P_AZD_2uM_1D_Ppetide_Tyr_IP_AZD3.raw	1	0	0	0	0	0	1	sp|Q13263|TIF1B_HUMAN	Acetylation (Protein N-term); Phosphorylation (STY)	A1:Acetylation (Protein N-term):1000.00;S8:Phosphorylation (STY):0.00	PEAKS DB
IYQY(+79.97)IQSR	36.16	1149.52	8	1.8	575.769	19.59	1200000	1420000	1190000	210000	190000	200000	2	F2:7245	3P_AZD_2uM_1D_Ppetide_Tyr_IP_CTL2.raw	6	1	1	1	1	1	1	sp|Q9Y463|DYR1B_HUMAN:tr|A0A2R8YDF3|A0A2R8YDF3_HUMAN:tr|A0A2R8Y6L5|A0A2R8Y6L5_HUMAN:sp|Q13627|DYR1A_HUMAN:tr|A0A2R8Y443|A0A2R8Y443_HUMAN:tr|A0A2R8Y6I6|A0A2R8Y6I6_HUMAN	Phosphorylation (STY)	Y4:Phosphorylation (STY):52.04	PEAKS DB
KDTETVY(+79.97)SEVR	35.94	1405.61	11	0.7	703.814	13.15			116000				3	F3:4074	3P_AZD_2uM_1D_Ppetide_Tyr_IP_CTL3.raw	1	0	0	1	0	0	0	sp|P16284|PECA1_HUMAN	Phosphorylation (STY)	Y7:Phosphorylation (STY):12.28	PEAKS DB
ATQPEPIY(+79.97)AESTKR	35.92	1669.77	14	0.9	835.894	15.68	128000	321000	124000	221000	170000	135000	6	F6:5043	3P_AZD_2uM_1D_Ppetide_Tyr_IP_AZD3.raw	7	1	2	1	1	1	1	sp|Q86YV5|PRAG1_HUMAN	Phosphorylation (STY)	Y8:Phosphorylation (STY):38.16	PEAKS DB
SGPKPFSAPKPQT(+79.97)SPSPK	35.6	1916.94	18	1.3	639.988	16.85				262000	208000		5	F5:5526	3P_AZD_2uM_1D_Ppetide_Tyr_IP_AZD2.raw	2	0	0	0	1	1	0	sp|Q01518|CAP1_HUMAN	Phosphorylation (STY)	T13:Phosphorylation (STY):0.00	PEAKS DB
LEDYFTSTEPQY(+79.97)QPGENL	35.51	2209.91	18	1.4	1105.96	52.89	254000	304000	658000	207000		177000	2	F2:20770	3P_AZD_2uM_1D_Ppetide_Tyr_IP_CTL2.raw	5	1	1	1	1	0	1	sp|P12931|SRC_HUMAN	Phosphorylation (STY)	Y12:Phosphorylation (STY):38.03	PEAKS DB
RAGDLLEDS(+79.97)PKRPK	35.35	1660.83	14	1.3	554.618	13.17				167000	192000	147000	6	F6:3838	3P_AZD_2uM_1D_Ppetide_Tyr_IP_AZD3.raw	3	0	0	0	1	1	1	sp|P51858|HDGF_HUMAN	Phosphorylation (STY)	S9:Phosphorylation (STY):1000.00	PEAKS DB
ASVNRGAQEN(+.98)GTGQ(+.98)ATSRNGHS(+79.97)ARQHVVADTEL	35.27	3499.58	33	2	875.905	15.68				4760000		3400000	6	F6:5041	3P_AZD_2uM_1D_Ppetide_Tyr_IP_AZD3.raw	3	0	0	0	2	0	1	sp|P28906|CD34_HUMAN	Deamidation (NQ); Phosphorylation (STY)	N10:Deamidation (NQ):32.28;Q14:Deamidation (NQ):0.00;S22:Phosphorylation (STY):9.45	PEAKS DB
RKPSVPDSASPADDSFVDPGERLYDLNM(+15.99)PAY(+79.97)VK	35.26	3731.72	33	1.6	933.938	43.07					0		5	F5:16061	3P_AZD_2uM_1D_Ppetide_Tyr_IP_AZD2.raw	0	0	0	0	0	0	0	sp|P16333|NCK1_HUMAN:tr|C9K098|C9K098_HUMAN:tr|C9JVV5|C9JVV5_HUMAN:tr|H7C5C7|H7C5C7_HUMAN:tr|C9J869|C9J869_HUMAN:tr|C9JAB9|C9JAB9_HUMAN	Oxidation (M); Phosphorylation (STY)	M28:Oxidation (M):1000.00;Y31:Phosphorylation (STY):0.00	PEAKS DB
WDTGENPIY(+79.97)K	35.13	1301.53	10	0.4	651.774	30.07	56700	78900	64100				3	F3:12017	3P_AZD_2uM_1D_Ppetide_Tyr_IP_CTL3.raw	3	1	1	1	0	0	0	sp|P05556|ITB1_HUMAN	Phosphorylation (STY)	Y9:Phosphorylation (STY):28.13	PEAKS DB
GPPDFSSDEEREPT(+79.97)PVLGSGAAAAGR	34.81	2649.17	26	1.2	884.065	36.38	126000	128000					1	F1:14395	3P_AZD_2uM_1D_Ppetide_Tyr_IP_CTL1.raw	2	1	1	0	0	0	0	sp|P42167|LAP2B_HUMAN:sp|P42166|LAP2A_HUMAN	Phosphorylation (STY)	T14:Phosphorylation (STY):0.00	PEAKS DB
YIEDEDY(+79.97)YK	34.64	1316.48	9	0.4	659.25	20.6	246000	248000	228000				2	F2:7791	3P_AZD_2uM_1D_Ppetide_Tyr_IP_CTL2.raw	3	1	1	1	0	0	0	sp|Q14289|FAK2_HUMAN	Phosphorylation (STY)	Y7:Phosphorylation (STY):14.02	PEAKS DB
VADPDHDHTGFLT(+79.97)EY(+79.97)VATR	34.39	2302.93	19	2.1	768.652	37.81	370000	317000					2	F2:15562	3P_AZD_2uM_1D_Ppetide_Tyr_IP_CTL2.raw	2	1	1	0	0	0	0	sp|P28482|MK01_HUMAN	Phosphorylation (STY)	T13:Phosphorylation (STY):0.00;Y15:Phosphorylation (STY):16.66	PEAKS DB
IADPEHDHTGFLT(+79.97)EY(+79.97)VATR	34.38	2330.96	19	1.3	777.995	39.71		139000	205000				2	F2:16479	3P_AZD_2uM_1D_Ppetide_Tyr_IP_CTL2.raw	2	0	1	1	0	0	0	tr|E9PJF0|E9PJF0_HUMAN:tr|E9PQW4|E9PQW4_HUMAN:sp|P27361|MK03_HUMAN	Phosphorylation (STY)	T13:Phosphorylation (STY):8.26;Y15:Phosphorylation (STY):7.77	PEAKS DB
IGEGTYGVVY(+79.97)K	34.32	1264.57	11	2	633.295	27.76	49500	63500	39900				1	F1:10775	3P_AZD_2uM_1D_Ppetide_Tyr_IP_CTL1.raw	3	1	1	1	0	0	0	sp|P24941|CDK2_HUMAN:tr|G3V5T9|G3V5T9_HUMAN:tr|K7ELV5|K7ELV5_HUMAN:sp|Q00526|CDK3_HUMAN:tr|E5RIU6|E5RIU6_HUMAN:tr|A0A087WZZ9|A0A087WZZ9_HUMAN:tr|E7ESI2|E7ESI2_HUMAN:sp|P06493|CDK1_HUMAN:tr|A0A024QZP7|A0A024QZP7_HUMAN:tr|G3V317|G3V317_HUMAN	Phosphorylation (STY)	Y10:Phosphorylation (STY):25.70	PEAKS DB
YTATEGQY(+79.97)QQQP	34.18	1492.59	12	0.9	747.302	15.93	22900000	28900000	21200000	7620000	6430000	7060000	2	F2:5493	3P_AZD_2uM_1D_Ppetide_Tyr_IP_CTL2.raw	6	1	1	1	1	1	1	sp|P07948|LYN_HUMAN	Phosphorylation (STY)	Y8:Phosphorylation (STY):28.70	PEAKS DB
AAASTDY(+79.97)YKR	34.16	1224.52	10	1.7	613.267	9.22	35100		30000				3	F3:2171	3P_AZD_2uM_1D_Ppetide_Tyr_IP_CTL3.raw	2	1	0	1	0	0	0	sp|P08559|ODPA_HUMAN	Phosphorylation (STY)	Y7:Phosphorylation (STY):0.00	PEAKS DB
YTATESQY(+79.97)QQQP	34.12	1522.6	12	0.1	762.306	15.93	2830000	3640000	2610000		533000	562000	2	F2:5506	3P_AZD_2uM_1D_Ppetide_Tyr_IP_CTL2.raw	5	1	1	1	0	1	1	tr|H0Y3C5|H0Y3C5_HUMAN:sp|P08631|HCK_HUMAN:tr|F6SF04|F6SF04_HUMAN:tr|J3KPD6|J3KPD6_HUMAN	Phosphorylation (STY)	Y8:Phosphorylation (STY):18.53	PEAKS DB
VVT(+79.97)FAPVNVTTEVK	33.97	1582.8	14	9	528.612	18.71		195000	167000	15400		9580	2	F2:6924	3P_AZD_2uM_1D_Ppetide_Tyr_IP_CTL2.raw	4	0	1	1	1	0	1	sp|P68104|EF1A1_HUMAN	Phosphorylation (STY)	T3:Phosphorylation (STY):67.12	PEAKS DB
EPEALY(+79.97)AAVNK	33.44	1283.58	11	1.4	642.798	28.5	368000	448000	410000	159000	134000	150000	6	F6:9829	3P_AZD_2uM_1D_Ppetide_Tyr_IP_AZD3.raw	6	1	1	1	1	1	1	tr|A0A087WVF7|A0A087WVF7_HUMAN:sp|Q9NZM3|ITSN2_HUMAN	Phosphorylation (STY)	Y6:Phosphorylation (STY):1000.00	PEAKS DB
GPPDFS(+79.97)SDEEREPTPVLGSGAAAAGR	33.1	2649.17	26	1.3	884.065	36.43			123000				3	F3:14791	3P_AZD_2uM_1D_Ppetide_Tyr_IP_CTL3.raw	1	0	0	1	0	0	0	sp|P42167|LAP2B_HUMAN:sp|P42166|LAP2A_HUMAN	Phosphorylation (STY)	S6:Phosphorylation (STY):0.00	PEAKS DB
FYTATEGQY(+79.97)QQQP	32.76	1639.66	13	0.3	820.835	27.78	6340000						1	F1:10872	3P_AZD_2uM_1D_Ppetide_Tyr_IP_CTL1.raw	1	1	0	0	0	0	0	sp|P07948|LYN_HUMAN	Phosphorylation (STY)	Y9:Phosphorylation (STY):31.27	PEAKS DB
ASVNRGAQEN(+.98)GTGQATSRNGHS(+79.97)ARQHVVADTEL	32.7	3498.6	33	-0.2	875.657	15.61						0	6	F6:5004	3P_AZD_2uM_1D_Ppetide_Tyr_IP_AZD3.raw	0	0	0	0	0	0	0	sp|P28906|CD34_HUMAN	Deamidation (NQ); Phosphorylation (STY)	N10:Deamidation (NQ):11.12;S22:Phosphorylation (STY):7.40	PEAKS DB
YIDAFSDY(+79.97)ANFK	32.46	1532.62	12	1.7	767.32	46.16			72100				3	F3:18756	3P_AZD_2uM_1D_Ppetide_Tyr_IP_CTL3.raw	1	0	0	1	0	0	0	sp|P18433|PTPRA_HUMAN	Phosphorylation (STY)	Y8:Phosphorylation (STY):12.81	PEAKS DB
AVC(+57.02)STY(+79.97)LQSR	32.44	1263.53	10	0.8	632.774	16.2		68300	59900				2	F2:5677	3P_AZD_2uM_1D_Ppetide_Tyr_IP_CTL2.raw	2	0	1	1	0	0	0	tr|Q5SQL3|Q5SQL3_HUMAN:tr|J3KP92|J3KP92_HUMAN:sp|Q86Z02|HIPK1_HUMAN:sp|Q9H2X6|HIPK2_HUMAN:tr|H7BXX9|H7BXX9_HUMAN	Carbamidomethylation; Phosphorylation (STY)	C3:Carbamidomethylation:1000.00;Y6:Phosphorylation (STY):7.77	PEAKS DB
QAEEERQEEPEY(+79.97)ENVVPISRPPEP	31.97	2930.3	24	1.3	977.774	39.52		1400000				524000	6	F6:14351	3P_AZD_2uM_1D_Ppetide_Tyr_IP_AZD3.raw	2	0	1	0	0	0	1	tr|A0A0A0MR54|A0A0A0MR54_HUMAN:sp|Q14162|SREC_HUMAN	Phosphorylation (STY)	Y12:Phosphorylation (STY):56.54	PEAKS DB
ASVNRGAQ(+.98)ENGTGQ(+.98)ATSRNGHS(+79.97)ARQHVVADTEL	31.87	3499.58	33	1.3	875.904	17.25					8680000		5	F5:5836	3P_AZD_2uM_1D_Ppetide_Tyr_IP_AZD2.raw	4	0	0	0	0	4	0	sp|P28906|CD34_HUMAN	Deamidation (NQ); Phosphorylation (STY)	Q8:Deamidation (NQ):0.00;Q14:Deamidation (NQ):0.00;S22:Phosphorylation (STY):5.16	PEAKS DB
KDTETVYS(+79.97)EVR	31.71	1405.61	11	1.3	703.814	13.14	86400	96300					1	F1:4024	3P_AZD_2uM_1D_Ppetide_Tyr_IP_CTL1.raw	2	1	1	0	0	0	0	sp|P16284|PECA1_HUMAN	Phosphorylation (STY)	S8:Phosphorylation (STY):0.00	PEAKS DB
YDQLY(+79.97)EEYTR	31.67	1458.57	10	0.2	730.293	27.67		49900	47200				3	F3:10947	3P_AZD_2uM_1D_Ppetide_Tyr_IP_CTL3.raw	2	0	1	1	0	0	0	sp|O00459|P85B_HUMAN:tr|E9PFP1|E9PFP1_HUMAN	Phosphorylation (STY)	Y5:Phosphorylation (STY):22.45	PEAKS DB
AAASTDYY(+79.97)KR	31.61	1224.52	10	0.9	613.267	9.17		37800					2	F2:2258	3P_AZD_2uM_1D_Ppetide_Tyr_IP_CTL2.raw	1	0	1	0	0	0	0	sp|P08559|ODPA_HUMAN	Phosphorylation (STY)	Y8:Phosphorylation (STY):0.00	PEAKS DB
C(+57.02)DFGSASHVADNDITPYLVS(+79.97)R	31.53	2403.02	21	1.7	802.015	43.75			75200				3	F3:17906	3P_AZD_2uM_1D_Ppetide_Tyr_IP_CTL3.raw	1	0	0	1	0	0	0	sp|Q13523|PRP4B_HUMAN:tr|H0YDJ3|H0YDJ3_HUMAN	Carbamidomethylation; Phosphorylation (STY)	C1:Carbamidomethylation:1000.00;S20:Phosphorylation (STY):0.00	PEAKS DB
NEAIY(+79.97)DIC(+57.02)R	31.48	1232.49	9	-0.5	617.252	27.59	0	0	0				3	F3:10872	3P_AZD_2uM_1D_Ppetide_Tyr_IP_CTL3.raw	0	0	0	0	0	0	0	sp|Q71U36|TBA1A_HUMAN:tr|F8VVB9|F8VVB9_HUMAN:sp|P68366|TBA4A_HUMAN	Phosphorylation (STY); Carbamidomethylation	Y5:Phosphorylation (STY):1000.00;C8:Carbamidomethylation:1000.00	PEAKS DB
VGEEEHVYS(+79.97)FPNK	31.42	1613.68	13	1.3	807.846	20.36						137000	6	F6:6763	3P_AZD_2uM_1D_Ppetide_Tyr_IP_AZD3.raw	1	0	0	0	0	0	1	tr|F5GZ78|F5GZ78_HUMAN:sp|P49023|PAXI_HUMAN:tr|A0A1B0GTU4|A0A1B0GTU4_HUMAN:tr|A0A1B0GU60|A0A1B0GU60_HUMAN:tr|F5H836|F5H836_HUMAN	Phosphorylation (STY)	S9:Phosphorylation (STY):0.00	PEAKS DB
Y(+79.97)QY(+79.97)PALTPEQKKELSDIAHRIVAPGK	31.33	3111.52	26	7	778.893	49.9						0	6	F6:18687	3P_AZD_2uM_1D_Ppetide_Tyr_IP_AZD3.raw	0	0	0	0	0	0	0	sp|P04075|ALDOA_HUMAN:tr|J3KPS3|J3KPS3_HUMAN	Phosphorylation (STY)	Y1:Phosphorylation (STY):36.87;Y3:Phosphorylation (STY):49.79	PEAKS DB
IVHSGLAYT(+79.97)MER	31.18	1455.66	12	1.5	728.837	23.64		75100					2	F2:9237	3P_AZD_2uM_1D_Ppetide_Tyr_IP_CTL2.raw	1	0	1	0	0	0	0	sp|P00367|DHE3_HUMAN	Phosphorylation (STY)	T9:Phosphorylation (STY):0.00	PEAKS DB
DVTDFLNIVLTTVFEKEKKPKFEILLALLN(+.98)DS(+79.97)T(+79.97)K	31.12	4082.09	34	-5.7	817.421	45.18				1170000			4	F4:17562	3P_AZD_2uM_1D_Ppetide_Tyr_IP_AZD1.raw	1	0	0	0	1	0	0	tr|A0A0A0MT16|A0A0A0MT16_HUMAN:sp|Q86UQ4|ABCAD_HUMAN	Deamidation (NQ); Phosphorylation (STY)	N30:Deamidation (NQ):19.58;S32:Phosphorylation (STY):16.88;T33:Phosphorylation (STY):16.49	PEAKS DB
LFDDPS(+79.97)YVNVQNLDK	30.94	1845.82	15	5.1	923.921	47.85					64000		5	F5:18004	3P_AZD_2uM_1D_Ppetide_Tyr_IP_AZD2.raw	1	0	0	0	0	1	0	sp|P29353|SHC1_HUMAN:tr|Q5T188|Q5T188_HUMAN:tr|H0Y539|H0Y539_HUMAN:tr|X6R6D0|X6R6D0_HUMAN	Phosphorylation (STY)	S6:Phosphorylation (STY):0.00	PEAKS DB
IVHSGLAY(+79.97)TMER	30.93	1455.66	12	0.8	728.837	23.71			62300				3	F3:9173	3P_AZD_2uM_1D_Ppetide_Tyr_IP_CTL3.raw	1	0	0	1	0	0	0	sp|P00367|DHE3_HUMAN	Phosphorylation (STY)	Y8:Phosphorylation (STY):0.00	PEAKS DB
VENC(+57.02)PDELY(+79.97)DIMK	30.93	1704.68	13	1.2	853.347	48.28	75500	78100	85000				3	F3:19492	3P_AZD_2uM_1D_Ppetide_Tyr_IP_CTL3.raw	3	1	1	1	0	0	0	sp|P07948|LYN_HUMAN	Carbamidomethylation; Phosphorylation (STY)	C4:Carbamidomethylation:1000.00;Y9:Phosphorylation (STY):1000.00	PEAKS DB
AGDLLEDS(+79.97)PK	29.92	1123.48	10	1.8	562.748	23.3	97400	127000	108000				3	F3:8983	3P_AZD_2uM_1D_Ppetide_Tyr_IP_CTL3.raw	3	1	1	1	0	0	0	sp|P51858|HDGF_HUMAN	Phosphorylation (STY)	S8:Phosphorylation (STY):1000.00	PEAKS DB
VKEEGYELPYNPAT(+79.97)DDYAVPPPR	29.83	2699.22	23	4.3	900.75	43.36		0					2	F2:17889	3P_AZD_2uM_1D_Ppetide_Tyr_IP_CTL2.raw	0	0	0	0	0	0	0	sp|Q99704|DOK1_HUMAN	Phosphorylation (STY)	T14:Phosphorylation (STY):0.00	PEAKS DB
GS(+79.97)LKASC(+57.02)LYGQLPK	29.49	1600.77	14	-8	534.592	25.85	80300	95700	82900	23800			3	F3:10154	3P_AZD_2uM_1D_Ppetide_Tyr_IP_CTL3.raw	4	1	1	1	1	0	0	sp|P09211|GSTP1_HUMAN	Phosphorylation (STY); Carbamidomethylation	S2:Phosphorylation (STY):8.26;C7:Carbamidomethylation:1000.00	PEAKS DB
EATQPEPIY(+79.97)AESTK	29.48	1642.71	14	1.6	822.365	20.75		69700	72300				3	F3:7756	3P_AZD_2uM_1D_Ppetide_Tyr_IP_CTL3.raw	2	0	1	1	0	0	0	sp|Q86YV5|PRAG1_HUMAN	Phosphorylation (STY)	Y9:Phosphorylation (STY):12.33	PEAKS DB
IYHLPDAES(+79.97)DEDEDFKEQTR	29.03	2516.04	20	2.2	839.688	32.16		129000	130000				2	F2:13156	3P_AZD_2uM_1D_Ppetide_Tyr_IP_CTL2.raw	2	0	1	1	0	0	0	sp|Q15019|SEPT2_HUMAN	Phosphorylation (STY)	S9:Phosphorylation (STY):7.40	PEAKS DB
QVVESAY(+79.97)EVIK	28.27	1343.64	11	1.3	672.827	33.54	60300	71800	63500				1	F1:13192	3P_AZD_2uM_1D_Ppetide_Tyr_IP_CTL1.raw	3	1	1	1	0	0	0	sp|P00338|LDHA_HUMAN	Phosphorylation (STY)	Y7:Phosphorylation (STY):26.31	PEAKS DB
SPSSC(+57.02)NDLY(+79.97)ATVK	28.14	1520.62	13	1.4	761.319	22.37	71500						1	F1:8440	3P_AZD_2uM_1D_Ppetide_Tyr_IP_CTL1.raw	1	1	0	0	0	0	0	sp|Q9NWQ8|PHAG1_HUMAN	Carbamidomethylation; Phosphorylation (STY)	C5:Carbamidomethylation:1000.00;Y9:Phosphorylation (STY):7.32	PEAKS DB
SGPKPFSAPKPQTS(+79.97)PSPK	28.13	1916.94	18	0.4	639.987	16.54						235000	6	F6:5292	3P_AZD_2uM_1D_Ppetide_Tyr_IP_AZD3.raw	1	0	0	0	0	0	1	sp|Q01518|CAP1_HUMAN	Phosphorylation (STY)	S14:Phosphorylation (STY):0.00	PEAKS DB
YQY(+79.97)IQSR	27.93	1036.44	7	1.4	519.227	13.1	862000	1050000	939000	187000	185000	150000	6	F6:3802	3P_AZD_2uM_1D_Ppetide_Tyr_IP_AZD3.raw	6	1	1	1	1	1	1	sp|Q9Y463|DYR1B_HUMAN:tr|A0A2R8YDF3|A0A2R8YDF3_HUMAN:tr|A0A2R8Y6L5|A0A2R8Y6L5_HUMAN:sp|Q13627|DYR1A_HUMAN:tr|A0A2R8Y443|A0A2R8Y443_HUMAN:tr|A0A2R8Y6I6|A0A2R8Y6I6_HUMAN	Phosphorylation (STY)	Y3:Phosphorylation (STY):30.72	PEAKS DB
IGEGT(+79.97)Y(+79.97)GVVYK	27.88	1344.54	11	2.6	673.279	31.35			328000				3	F3:12506	3P_AZD_2uM_1D_Ppetide_Tyr_IP_CTL3.raw	1	0	0	1	0	0	0	sp|P24941|CDK2_HUMAN:tr|G3V5T9|G3V5T9_HUMAN:tr|K7ELV5|K7ELV5_HUMAN:sp|Q00526|CDK3_HUMAN:tr|E5RIU6|E5RIU6_HUMAN:tr|A0A087WZZ9|A0A087WZZ9_HUMAN:tr|E7ESI2|E7ESI2_HUMAN:sp|P06493|CDK1_HUMAN:tr|A0A024QZP7|A0A024QZP7_HUMAN:tr|G3V317|G3V317_HUMAN	Phosphorylation (STY)	T5:Phosphorylation (STY):24.47;Y6:Phosphorylation (STY):18.33	PEAKS DB
LLY(+79.97)YANK	27.86	963.447	7	1	482.731	21.7	310000	337000	292000	83800	69000	43500	2	F2:8313	3P_AZD_2uM_1D_Ppetide_Tyr_IP_CTL2.raw	6	1	1	1	1	1	1		Phosphorylation (STY)	Y3:Phosphorylation (STY):27.96	PEAKS DB
C(+57.02)GSGPVHISGQHLVAVEEDAES(+79.97)EDEEEEDVK	27.62	3459.43	31	0.1	1154.15	35.74				51900			4	F4:13458	3P_AZD_2uM_1D_Ppetide_Tyr_IP_AZD1.raw	1	0	0	0	1	0	0	sp|P06748|NPM_HUMAN	Carbamidomethylation; Phosphorylation (STY)	C1:Carbamidomethylation:1000.00;S22:Phosphorylation (STY):32.45	PEAKS DB
EDYFTSTEPQY(+79.97)QPGENL	27.54	2096.83	17	0.7	1049.42	48.22			151000				3	F3:19458	3P_AZD_2uM_1D_Ppetide_Tyr_IP_CTL3.raw	1	0	0	1	0	0	0	sp|P12931|SRC_HUMAN	Phosphorylation (STY)	Y11:Phosphorylation (STY):12.35	PEAKS DB
ASVNRGAQEN(+.98)GTGQ(+.98)ATS(+79.97)RNGHSARQHVVADTEL	27.35	3499.58	33	2	875.905	15.68						3400000	6	F6:5127	3P_AZD_2uM_1D_Ppetide_Tyr_IP_AZD3.raw	1	0	0	0	0	0	1	sp|P28906|CD34_HUMAN	Deamidation (NQ); Phosphorylation (STY)	N10:Deamidation (NQ):7.81;Q14:Deamidation (NQ):0.00;S17:Phosphorylation (STY):0.00	PEAKS DB
TETVY(+79.97)SEVR	27.15	1162.49	9	0.8	582.253	15.85	307000	397000	366000	63500	42200		2	F2:5508	3P_AZD_2uM_1D_Ppetide_Tyr_IP_CTL2.raw	5	1	1	1	1	1	0	sp|P16284|PECA1_HUMAN	Phosphorylation (STY)	Y5:Phosphorylation (STY):20.92	PEAKS DB
YFTAT(+79.97)EPQYQPGENL	26.78	1836.76	15	1.1	919.389	45.26			1330000				3	F3:18381	3P_AZD_2uM_1D_Ppetide_Tyr_IP_CTL3.raw	1	0	0	1	0	0	0	sp|P06241|FYN_HUMAN:sp|P07947|YES_HUMAN:tr|J3QRU1|J3QRU1_HUMAN	Phosphorylation (STY)	T5:Phosphorylation (STY):0.00	PEAKS DB
KLEKEEEEGISQESS(+79.97)EEEQ	26.65	2315.95	19	1.5	1158.99	14.14				46900			4	F4:4325	3P_AZD_2uM_1D_Ppetide_Tyr_IP_AZD1.raw	1	0	0	0	1	0	0	sp|P17096|HMGA1_HUMAN	Phosphorylation (STY)	S15:Phosphorylation (STY):0.00	PEAKS DB
DTETVY(+79.97)SEVR	26.56	1277.52	10	-0.3	639.766	18.68	15900	24600					2	F2:6900	3P_AZD_2uM_1D_Ppetide_Tyr_IP_CTL2.raw	2	1	1	0	0	0	0	sp|P16284|PECA1_HUMAN	Phosphorylation (STY)	Y6:Phosphorylation (STY):8.69	PEAKS DB
SLY(+79.97)ASSPGGVYATR	26.34	1507.67	14	0.5	754.843	28.25		12400					2	F2:11386	3P_AZD_2uM_1D_Ppetide_Tyr_IP_CTL2.raw	1	0	1	0	0	0	0	sp|P08670|VIME_HUMAN	Phosphorylation (STY)	Y3:Phosphorylation (STY):5.03	PEAKS DB
EATQPEPIY(+79.97)AESTKR	26.32	1798.81	15	2.1	900.416	17.13				61100	47800		5	F5:5686	3P_AZD_2uM_1D_Ppetide_Tyr_IP_AZD2.raw	2	0	0	0	1	1	0	sp|Q86YV5|PRAG1_HUMAN	Phosphorylation (STY)	Y9:Phosphorylation (STY):5.77	PEAKS DB
AC(+57.02)SVAGSWVC(+57.02)PRPLARS(+79.97)DSENVYEVIQDLHVPPREESAEQVDDPPEPVYANIERQPR	26.32	6593.08	57	5.8	942.881	48.89						446000	6	F6:18230	3P_AZD_2uM_1D_Ppetide_Tyr_IP_AZD3.raw	1	0	0	0	0	0	1	tr|A0A0G2JRG8|A0A0G2JRG8_HUMAN:tr|A0A0G2JNY3|A0A0G2JNY3_HUMAN	Carbamidomethylation; Phosphorylation (STY)	C2:Carbamidomethylation:1000.00;C10:Carbamidomethylation:1000.00;S17:Phosphorylation (STY):0.00	PEAKS DB
YFTSTEPQY(+79.97)QPGENL	26.04	1852.76	15	0.7	927.386	43.06	2530000			287000		242000	1	F1:17068	3P_AZD_2uM_1D_Ppetide_Tyr_IP_CTL1.raw	3	1	0	0	1	0	1	sp|P12931|SRC_HUMAN	Phosphorylation (STY)	Y9:Phosphorylation (STY):10.19	PEAKS DB
NGHS(+79.97)ARQHVVADTEL	25.74	1712.76	15	1.1	571.929	15.77				411000	343000	403000	6	F6:5090	3P_AZD_2uM_1D_Ppetide_Tyr_IP_AZD3.raw	3	0	0	0	1	1	1	sp|P28906|CD34_HUMAN	Phosphorylation (STY)	S4:Phosphorylation (STY):46.57	PEAKS DB
LNY(+79.97)LDPR	25.71	969.432	7	1.4	485.724	22.93	120000	156000	121000	84000	68000	79500	1	F1:8695	3P_AZD_2uM_1D_Ppetide_Tyr_IP_CTL1.raw	6	1	1	1	1	1	1	tr|H0YAR3|H0YAR3_HUMAN:sp|Q969P6|TOP1M_HUMAN:sp|P11387|TOP1_HUMAN	Phosphorylation (STY)	Y3:Phosphorylation (STY):1000.00	PEAKS DB
S(+79.97)PEGEQEDRPGLHAYEK	25.67	2020.85	17	1.7	674.626	15.39	78600		64300				1	F1:5118	3P_AZD_2uM_1D_Ppetide_Tyr_IP_CTL1.raw	2	1	0	1	0	0	0	sp|P33241|LSP1_HUMAN	Phosphorylation (STY)	S1:Phosphorylation (STY):20.30	PEAKS DB
VSSTHY(+79.97)YLLPERPSYLER	25.65	2289.08	18	0.1	764.035	39.33			478000	294000			3	F3:16026	3P_AZD_2uM_1D_Ppetide_Tyr_IP_CTL3.raw	2	0	0	1	1	0	0	sp|Q07912|ACK1_HUMAN:tr|C9J1X3|C9J1X3_HUMAN:tr|H0Y5H7|H0Y5H7_HUMAN	Phosphorylation (STY)	Y6:Phosphorylation (STY):14.02	PEAKS DB
VADNDITPY(+79.97)LVSR	25.58	1541.71	13	1.1	771.864	39.95	218000	275000	253000				3	F3:16306	3P_AZD_2uM_1D_Ppetide_Tyr_IP_CTL3.raw	3	1	1	1	0	0	0	sp|Q13523|PRP4B_HUMAN:tr|H0YDJ3|H0YDJ3_HUMAN	Phosphorylation (STY)	Y9:Phosphorylation (STY):6.63	PEAKS DB
INVYYNEATGGNYVPRAVLVDLEPGTM(+15.99)DS(+79.97)VRS(+79.97)GPFGQIFRPDNFVFGQSGAGNNWAKGHYT	25.53	6825.12	61	4.8	976.029	49.29						22500	6	F6:18439	3P_AZD_2uM_1D_Ppetide_Tyr_IP_AZD3.raw	1	0	0	0	0	0	1	sp|P04350|TBB4A_HUMAN	Oxidation (M); Phosphorylation (STY)	M27:Oxidation (M):1000.00;S29:Phosphorylation (STY):0.00;S32:Phosphorylation (STY):0.00	PEAKS DB
TETVY(+79.97)SEVRK	25.53	1290.59	10	0.6	646.301	12.31				52200	53800		5	F5:3485	3P_AZD_2uM_1D_Ppetide_Tyr_IP_AZD2.raw	2	0	0	0	1	1	0	sp|P16284|PECA1_HUMAN	Phosphorylation (STY)	Y5:Phosphorylation (STY):14.02	PEAKS DB
VC(+57.02)STY(+79.97)LQSR	25.46	1192.49	9	0.4	597.255	14.99	61100	71700					1	F1:4910	3P_AZD_2uM_1D_Ppetide_Tyr_IP_CTL1.raw	2	1	1	0	0	0	0	sp|Q9H422|HIPK3_HUMAN:tr|Q5SQL3|Q5SQL3_HUMAN:tr|J3KP92|J3KP92_HUMAN:sp|Q86Z02|HIPK1_HUMAN:sp|Q9H2X6|HIPK2_HUMAN:tr|H7BXX9|H7BXX9_HUMAN	Carbamidomethylation; Phosphorylation (STY)	C2:Carbamidomethylation:1000.00;Y5:Phosphorylation (STY):11.12	PEAKS DB
RKPSVPDSASPADDSFVDPGERLY(+79.97)DLN(+.98)M(+15.99)PAYVK	25.42	3732.7	33	9.3	934.191	43.11					123000		5	F5:16061	3P_AZD_2uM_1D_Ppetide_Tyr_IP_AZD2.raw	1	0	0	0	0	1	0	sp|P16333|NCK1_HUMAN:tr|C9K098|C9K098_HUMAN:tr|C9JVV5|C9JVV5_HUMAN:tr|H7C5C7|H7C5C7_HUMAN:tr|C9J869|C9J869_HUMAN:tr|C9JAB9|C9JAB9_HUMAN	Phosphorylation (STY); Deamidation (NQ); Oxidation (M)	Y24:Phosphorylation (STY):0.00;N27:Deamidation (NQ):1000.00;M28:Oxidation (M):1000.00	PEAKS DB
ISGLIYEET(+79.97)R	25.37	1259.58	10	2.2	630.799	32.64	25200	29200	29700				3	F3:13184	3P_AZD_2uM_1D_Ppetide_Tyr_IP_CTL3.raw	3	1	1	1	0	0	0	sp|P62805|H4_HUMAN	Phosphorylation (STY)	T9:Phosphorylation (STY):0.00	PEAKS DB
QLVRGEPNVSY(+79.97)IC(+57.02)SR	25.36	1856.86	15	-0.4	619.96	29.7				233000	203000	198000	5	F5:10468	3P_AZD_2uM_1D_Ppetide_Tyr_IP_AZD2.raw	3	0	0	0	1	1	1	sp|P49840|GSK3A_HUMAN:tr|A8MT37|A8MT37_HUMAN:sp|P49841|GSK3B_HUMAN:tr|A0A3B3ITW1|A0A3B3ITW1_HUMAN	Phosphorylation (STY); Carbamidomethylation	Y11:Phosphorylation (STY):14.02;C13:Carbamidomethylation:1000.00	PEAKS DB
KQ(+.98)LLC(+57.02)GAAIGTHEDDKY(+79.97)RLDLLAQAGVDVVVLDSSQGNSIFQINM(+15.99)IK	25.31	5239.59	47	1.8	749.522	36.03				73200			4	F4:13585	3P_AZD_2uM_1D_Ppetide_Tyr_IP_AZD1.raw	1	0	0	0	1	0	0	tr|H0Y4R1|H0Y4R1_HUMAN:sp|P12268|IMDH2_HUMAN	Deamidation (NQ); Carbamidomethylation; Phosphorylation (STY); Oxidation (M)	Q2:Deamidation (NQ):0.29;C5:Carbamidomethylation:1000.00;Y17:Phosphorylation (STY):0.00;M45:Oxidation (M):1000.00	PEAKS DB
IEDVGSDEEDDS(+79.97)GKDKK	25.21	1944.78	17	1.6	649.269	10.3				63800		53100	4	F4:2569	3P_AZD_2uM_1D_Ppetide_Tyr_IP_AZD1.raw	2	0	0	0	1	0	1	sp|P08238|HS90B_HUMAN	Phosphorylation (STY)	S12:Phosphorylation (STY):0.00	PEAKS DB
TKFAS(+79.97)DDEHDEHDEN(+.98)GATGPVKR	25.15	2635.08	23	2	659.779	11.47					173000		5	F5:3080	3P_AZD_2uM_1D_Ppetide_Tyr_IP_AZD2.raw	1	0	0	0	0	1	0	sp|P05455|LA_HUMAN	Phosphorylation (STY); Deamidation (NQ)	S5:Phosphorylation (STY):16.51;N15:Deamidation (NQ):1000.00	PEAKS DB
KPLHYAADC(+57.02)GQLEILEFLLLKGADIN(+.98)APDKHHITPLLS(+79.97)AVY(+79.97)EGHVSC(+57.02)VK	24.87	5640.76	49	2.3	806.832	33.11				394000			4	F4:12310	3P_AZD_2uM_1D_Ppetide_Tyr_IP_AZD1.raw	1	0	0	0	1	0	0	sp|P58546|MTPN_HUMAN	Carbamidomethylation; Deamidation (NQ); Phosphorylation (STY)	C9:Carbamidomethylation:1000.00;N26:Deamidation (NQ):0.00;S38:Phosphorylation (STY):0.00;Y41:Phosphorylation (STY):0.00;C47:Carbamidomethylation:1000.00	PEAKS DB
VQ(+.98)PNEAVY(+79.97)TK	24.57	1228.54	10	-0.4	615.276	14.2		50800					2	F2:4723	3P_AZD_2uM_1D_Ppetide_Tyr_IP_CTL2.raw	1	0	1	0	0	0	0	sp|P11413|G6PD_HUMAN	Deamidation (NQ); Phosphorylation (STY)	Q2:Deamidation (NQ):15.21;Y8:Phosphorylation (STY):0.00	PEAKS DB
VIEDN(+.98)EY(+79.97)TAR	24.45	1289.52	10	0.7	645.767	13.59		74800					2	F2:4411	3P_AZD_2uM_1D_Ppetide_Tyr_IP_CTL2.raw	1	0	1	0	0	0	0	sp|P07948|LYN_HUMAN:tr|H0Y3C5|H0Y3C5_HUMAN:sp|P08631|HCK_HUMAN:tr|F6SF04|F6SF04_HUMAN:tr|J3KPD6|J3KPD6_HUMAN	Deamidation (NQ); Phosphorylation (STY)	N5:Deamidation (NQ):1000.00;Y7:Phosphorylation (STY):11.06	PEAKS DB
YIEDEDYY(+79.97)K	24.3	1316.48	9	0.5	659.25	19.83			28400				3	F3:7317	3P_AZD_2uM_1D_Ppetide_Tyr_IP_CTL3.raw	1	0	0	1	0	0	0	sp|Q14289|FAK2_HUMAN	Phosphorylation (STY)	Y8:Phosphorylation (STY):14.02	PEAKS DB
DDFYT(+79.97)ATEGQYQQQP	24.28	1869.71	15	1.4	935.863	35.86					266000		5	F5:12880	3P_AZD_2uM_1D_Ppetide_Tyr_IP_AZD2.raw	1	0	0	0	0	1	0	sp|P07948|LYN_HUMAN	Phosphorylation (STY)	T5:Phosphorylation (STY):0.00	PEAKS DB
S(+79.97)VFFGGLSIK	24.13	1133.55	10	7	567.787	53.03		15600	14700				2	F2:20846	3P_AZD_2uM_1D_Ppetide_Tyr_IP_CTL2.raw	2	0	1	1	0	0	0	sp|O00148|DX39A_HUMAN	Phosphorylation (STY)	S1:Phosphorylation (STY):50.34	PEAKS DB
YC(+57.02)RPESQEHPEADPGSAAPY(+79.97)LKTK	24.04	2810.24	24	1.5	703.568	18.83						60600	6	F6:6069	3P_AZD_2uM_1D_Ppetide_Tyr_IP_AZD3.raw	1	0	0	0	0	0	1	sp|P40763|STAT3_HUMAN:tr|G8JLH9|G8JLH9_HUMAN	Carbamidomethylation; Phosphorylation (STY)	C2:Carbamidomethylation:1000.00;Y20:Phosphorylation (STY):0.00	PEAKS DB
KASLTSKIPALAVEM(+15.99)PGS(+79.97)ADIS(+79.97)GLNLQFGALQFGSEPVLSDYESTPT	23.98	5012.37	47	-1.1	1003.48	30.7						0	6	F6:10729	3P_AZD_2uM_1D_Ppetide_Tyr_IP_AZD3.raw	0	0	0	0	0	0	0	sp|Q14157|UBP2L_HUMAN:tr|F8W726|F8W726_HUMAN	Oxidation (M); Phosphorylation (STY)	M15:Oxidation (M):1000.00;S18:Phosphorylation (STY):0.00;S22:Phosphorylation (STY):0.00	PEAKS DB
F(+42.01)N(+.98)Y(+79.97)THIC(+57.02)AGASAFGK	23.82	1765.72	15	-2.8	589.578	34.22	97000	97300	149000				2	F2:14084	3P_AZD_2uM_1D_Ppetide_Tyr_IP_CTL2.raw	3	1	1	1	0	0	0		Acetylation (Protein N-term); Deamidation (NQ); Phosphorylation (STY); Carbamidomethylation	F1:Acetylation (Protein N-term):1000.00;N2:Deamidation (NQ):1000.00;Y3:Phosphorylation (STY):17.01;C7:Carbamidomethylation:1000.00	PEAKS DB
KLGVNNISGIEEVN(+.98)MFTN(+.98)QGTVIHFNNPKVQAS(+79.97)LAANTFTITGHAETK	23.71	5236.55	48	4.5	655.58	27.3				8790			4	F4:9838	3P_AZD_2uM_1D_Ppetide_Tyr_IP_AZD1.raw	1	0	0	0	1	0	0	sp|P20290|BTF3_HUMAN	Deamidation (NQ); Phosphorylation (STY)	N14:Deamidation (NQ):0.88;N18:Deamidation (NQ):0.35;S33:Phosphorylation (STY):0.00	PEAKS DB
SINPLGGFVHYGEVTN(+.98)DFVMLKGC(+57.02)VVGT(+79.97)K	23.56	3218.52	29	-5	644.708	54.03						0	6	F6:20201	3P_AZD_2uM_1D_Ppetide_Tyr_IP_AZD3.raw	0	0	0	0	0	0	0	sp|P39023|RL3_HUMAN	Deamidation (NQ); Carbamidomethylation; Phosphorylation (STY)	N16:Deamidation (NQ):6.38;C24:Carbamidomethylation:1000.00;T28:Phosphorylation (STY):0.00	PEAKS DB
DFYT(+79.97)ATEGQYQQQP	23.56	1754.68	14	2.1	878.35	35.75	900000	1170000	1180000				1	F1:14022	3P_AZD_2uM_1D_Ppetide_Tyr_IP_CTL1.raw	3	1	1	1	0	0	0	sp|P07948|LYN_HUMAN	Phosphorylation (STY)	T4:Phosphorylation (STY):0.00	PEAKS DB
KLGVNNIS(+79.97)GIEEVNMFTNQ(+.98)GTVIHFNNPKVQAS(+79.97)LAANT	23.48	4229.99	38	3	1058.51	41.48						74800	6	F6:15196	3P_AZD_2uM_1D_Ppetide_Tyr_IP_AZD3.raw	1	0	0	0	0	0	1	sp|P20290|BTF3_HUMAN	Phosphorylation (STY); Deamidation (NQ)	S8:Phosphorylation (STY):7.81;Q19:Deamidation (NQ):0.00;S33:Phosphorylation (STY):0.00	PEAKS DB
VADPDHDHTGFLT(+79.97)EYVAT(+79.97)R	23.37	2302.93	19	2.2	768.652	37.47	370000						1	F1:14831	3P_AZD_2uM_1D_Ppetide_Tyr_IP_CTL1.raw	1	1	0	0	0	0	0	sp|P28482|MK01_HUMAN	Phosphorylation (STY)	T13:Phosphorylation (STY):0.00;T18:Phosphorylation (STY):0.00	PEAKS DB
HTDDEM(+15.99)T(+79.97)GY(+79.97)VATR	23.27	1670.57	13	2.7	836.294	11.1		73900	85100				2	F2:3195	3P_AZD_2uM_1D_Ppetide_Tyr_IP_CTL2.raw	2	0	1	1	0	0	0	sp|Q16539|MK14_HUMAN:tr|B4E0K5|B4E0K5_HUMAN:tr|E7EX54|E7EX54_HUMAN	Oxidation (M); Phosphorylation (STY)	M6:Oxidation (M):1000.00;T7:Phosphorylation (STY):9.30;Y9:Phosphorylation (STY):10.22	PEAKS DB
SAPKPQTS(+79.97)PSPK	23.12	1303.62	12	1.4	652.817	8.77	247000	228000					2	F2:2056	3P_AZD_2uM_1D_Ppetide_Tyr_IP_CTL2.raw	2	1	1	0	0	0	0	sp|Q01518|CAP1_HUMAN	Phosphorylation (STY)	S8:Phosphorylation (STY):0.00	PEAKS DB
FAS(+79.97)DDEHDEHDEN(+.98)GATGPVKR	23.05	2405.94	21	2.1	602.494	12.92		0		131000		95400	4	F4:3735	3P_AZD_2uM_1D_Ppetide_Tyr_IP_AZD1.raw	2	0	0	0	1	0	1	sp|P05455|LA_HUMAN	Phosphorylation (STY); Deamidation (NQ)	S3:Phosphorylation (STY):4.25;N13:Deamidation (NQ):1000.00	PEAKS DB
KGAGDGS(+79.97)DEEVDGKADGAEAKPAE	22.87	2381.99	24	0.9	795.003	12.08				55900		58800	4	F4:3328	3P_AZD_2uM_1D_Ppetide_Tyr_IP_AZD1.raw	2	0	0	0	1	0	1	sp|P35579|MYH9_HUMAN	Phosphorylation (STY)	S7:Phosphorylation (STY):1000.00	PEAKS DB
NDITPY(+79.97)LVSR	22.87	1256.58	10	-1.8	629.296	35.84	1080000	1380000	1400000		361000	377000	3	F3:14451	3P_AZD_2uM_1D_Ppetide_Tyr_IP_CTL3.raw	5	1	1	1	0	1	1	sp|Q13523|PRP4B_HUMAN:tr|H0YDJ3|H0YDJ3_HUMAN	Phosphorylation (STY)	Y6:Phosphorylation (STY):3.64	PEAKS DB
NPLPS(+79.97)KET(+79.97)IEQEK	22.85	1671.72	13	8.1	558.25	15.72						93000	6	F6:5088	3P_AZD_2uM_1D_Ppetide_Tyr_IP_AZD3.raw	1	0	0	0	0	0	1	sp|P62328|TYB4_HUMAN	Phosphorylation (STY)	S5:Phosphorylation (STY):1000.00;T8:Phosphorylation (STY):1000.00	PEAKS DB
DRPHEEPGAAAGSSSKKDLALSNQSISNSPLMPNVLQT(+79.97)LSRGTASTSSNSASSFVVFDGAN(+.98)R	22.81	6426.05	62	4.1	1072.02	48.15					218000		5	F5:18118	3P_AZD_2uM_1D_Ppetide_Tyr_IP_AZD2.raw	1	0	0	0	0	1	0	sp|Q15911|ZFHX3_HUMAN	Phosphorylation (STY); Deamidation (NQ)	T38:Phosphorylation (STY):0.00;N61:Deamidation (NQ):2.72	PEAKS DB
DKEVS(+79.97)DDEAEEKEDKEEEK	22.76	2359.94	19	1.4	787.656	9.23		125000	116000				2	F2:2265	3P_AZD_2uM_1D_Ppetide_Tyr_IP_CTL2.raw	2	0	1	1	0	0	0	sp|P07900|HS90A_HUMAN	Phosphorylation (STY)	S5:Phosphorylation (STY):1000.00	PEAKS DB
VIEDN(+.98)EYT(+79.97)AR	22.73	1289.52	10	1.9	645.767	13.41	68500		71900				1	F1:4178	3P_AZD_2uM_1D_Ppetide_Tyr_IP_CTL1.raw	2	1	0	1	0	0	0	sp|P07948|LYN_HUMAN:tr|H0Y3C5|H0Y3C5_HUMAN:sp|P08631|HCK_HUMAN:tr|F6SF04|F6SF04_HUMAN:tr|J3KPD6|J3KPD6_HUMAN	Deamidation (NQ); Phosphorylation (STY)	N5:Deamidation (NQ):1000.00;T8:Phosphorylation (STY):0.00	PEAKS DB
KSAPAT(+79.97)GGVKKPHR	22.71	1512.79	14	-1.9	379.205	5.99				23900			4	F4:1033	3P_AZD_2uM_1D_Ppetide_Tyr_IP_AZD1.raw	1	0	0	0	1	0	0	sp|P68431|H31_HUMAN:sp|Q71DI3|H32_HUMAN	Phosphorylation (STY)	T6:Phosphorylation (STY):0.00	PEAKS DB
IDASKNEEDEGHSNSS(+79.97)PR	22.69	2050.82	18	1.8	684.616	7.09				140000	150000		5	F5:1518	3P_AZD_2uM_1D_Ppetide_Tyr_IP_AZD2.raw	2	0	0	0	1	1	0	sp|Q14103|HNRPD_HUMAN	Phosphorylation (STY)	S16:Phosphorylation (STY):0.00	PEAKS DB
RKPS(+79.97)PEPEGEVGPPK	22.47	1682.8	15	1.7	561.942	12.91		62500	62100				3	F3:3937	3P_AZD_2uM_1D_Ppetide_Tyr_IP_CTL3.raw	2	0	1	1	0	0	0	sp|Q7Z5L9|I2BP2_HUMAN	Phosphorylation (STY)	S4:Phosphorylation (STY):1000.00	PEAKS DB
WFRNGQEEKAGVVS(+79.97)TGLIQNGDWTFQTLVMLETVPRSGEVYTC(+57.02)QVEHPSVMSPLT(+79.97)VE	22.45	6596.06	57	-0.8	943.3	49.05					0		5	F5:18512	3P_AZD_2uM_1D_Ppetide_Tyr_IP_AZD2.raw	0	0	0	0	0	0	0	sp|Q9TQE0|2B19_HUMAN:sp|P13761|2B17_HUMAN:tr|A0A140T958|A0A140T958_HUMAN	Phosphorylation (STY); Carbamidomethylation	S14:Phosphorylation (STY):0.00;C43:Carbamidomethylation:1000.00;T55:Phosphorylation (STY):0.00	PEAKS DB
KVSPNELILGWYATGHDIT(+79.97)EHSVLIHEYYSREAPN(+.98)PIHLTVDTSLQNGRM(+15.99)SIK	22.27	6126	53	-6.8	766.752	36.59				41800			4	F4:13801	3P_AZD_2uM_1D_Ppetide_Tyr_IP_AZD1.raw	1	0	0	0	1	0	0	sp|O00303|EIF3F_HUMAN	Phosphorylation (STY); Deamidation (NQ); Oxidation (M)	T19:Phosphorylation (STY):0.00;N35:Deamidation (NQ):3.11;M50:Oxidation (M):1000.00	PEAKS DB
QADSEM(+15.99)TGY(+79.97)VVTR	22.14	1551.63	13	1	776.822	16.14	127000						1	F1:5474	3P_AZD_2uM_1D_Ppetide_Tyr_IP_CTL1.raw	1	1	0	0	0	0	0	sp|P53778|MK12_HUMAN:tr|B5MDL5|B5MDL5_HUMAN	Oxidation (M); Phosphorylation (STY)	M6:Oxidation (M):1000.00;Y9:Phosphorylation (STY):9.40	PEAKS DB
VIY(+79.97)DFIEK	22.08	1105.51	8	1.9	553.763	40.16	130000	141000					1	F1:15894	3P_AZD_2uM_1D_Ppetide_Tyr_IP_CTL1.raw	2	1	1	0	0	0	0	sp|O00401|WASL_HUMAN	Phosphorylation (STY)	Y3:Phosphorylation (STY):1000.00	PEAKS DB
SESSGVIEEVEN(+.98)EADWFLSANVMYKIGDLGHAT(+79.97)SINKPKVEEGDSRFLANEILQEDYR	21.9	6609.08	58	2.1	945.164	48.46						3090000	6	F6:17999	3P_AZD_2uM_1D_Ppetide_Tyr_IP_AZD3.raw	1	0	0	0	0	0	1	sp|P0C1S8|WEE2_HUMAN	Deamidation (NQ); Phosphorylation (STY)	N12:Deamidation (NQ):7.81;T33:Phosphorylation (STY):0.00	PEAKS DB
NLNHVS(+79.97)YGR	21.87	1138.49	9	0.8	570.254	10.38	30000		24100				3	F3:2724	3P_AZD_2uM_1D_Ppetide_Tyr_IP_CTL3.raw	2	1	0	1	0	0	0	sp|P00367|DHE3_HUMAN	Phosphorylation (STY)	S6:Phosphorylation (STY):0.00	PEAKS DB
YHGHSMSDPGVS(+79.97)YR	21.76	1671.65	14	1.3	558.225	12.64		20600					2	F2:3943	3P_AZD_2uM_1D_Ppetide_Tyr_IP_CTL2.raw	1	0	1	0	0	0	0	sp|P08559|ODPA_HUMAN:sp|P29803|ODPAT_HUMAN	Phosphorylation (STY)	S12:Phosphorylation (STY):0.00	PEAKS DB
YSQ(+.98)SILLDLTDNRLQSTLKTLSFSFPPN(+.98)TVTGSERVQITAIGDVLGPSINGLAS(+79.97)LIR	21.68	6198.21	57	-8.5	1034.03	26.57				105000			4	F4:9562	3P_AZD_2uM_1D_Ppetide_Tyr_IP_AZD1.raw	1	0	0	0	1	0	0	sp|Q6YHK3|CD109_HUMAN	Deamidation (NQ); Phosphorylation (STY)	Q3:Deamidation (NQ):0.00;N28:Deamidation (NQ):0.00;S54:Phosphorylation (STY):0.00	PEAKS DB
GKMS(+79.97)S(+79.97)Y(+79.97)AFFVQTC(+57.02)R	21.68	1920.67	14	-7.5	641.227	39.45				186000			4	F4:15094	3P_AZD_2uM_1D_Ppetide_Tyr_IP_AZD1.raw	1	0	0	0	1	0	0	sp|P09429|HMGB1_HUMAN:sp|P26583|HMGB2_HUMAN	Phosphorylation (STY); Carbamidomethylation	S4:Phosphorylation (STY):40.94;S5:Phosphorylation (STY):43.57;Y6:Phosphorylation (STY):47.92;C13:Carbamidomethylation:1000.00	PEAKS DB
KINS(+79.97)SPNVNTTASGVEDLNIIQVTIPDDDNERLSKVEK	21.65	4232.09	38	7.6	847.431	38.97					395000		5	F5:14246	3P_AZD_2uM_1D_Ppetide_Tyr_IP_AZD2.raw	1	0	0	0	0	1	0	sp|P78347|GTF2I_HUMAN	Phosphorylation (STY)	S4:Phosphorylation (STY):0.00	PEAKS DB
M(+15.99)TPGIC(+57.02)IQ(+.98)LVAVPYSYSFLMALFHTILTFRLSY(+79.97)C(+57.02)HSNIVNHFYC(+57.02)DDMPLLRLTC(+57.02)SDTR	21.62	7054.3	58	-4	1008.76	48.46					5120000		5	F5:18181	3P_AZD_2uM_1D_Ppetide_Tyr_IP_AZD2.raw	1	0	0	0	0	1	0	sp|P0C7N1|OR8U8_HUMAN	Oxidation (M); Carbamidomethylation; Deamidation (NQ); Phosphorylation (STY)	M1:Oxidation (M):32.45;C6:Carbamidomethylation:1000.00;Q8:Deamidation (NQ):3.55;Y33:Phosphorylation (STY):0.00;C34:Carbamidomethylation:1000.00;C44:Carbamidomethylation:1000.00;C54:Carbamidomethylation:1000.00	PEAKS DB
APGS(+79.97)PLSSEGAAGEGVR	21.58	1620.71	17	2.8	811.367	23.93		48100					2	F2:9370	3P_AZD_2uM_1D_Ppetide_Tyr_IP_CTL2.raw	1	0	1	0	0	0	0	sp|Q6JBY9|CPZIP_HUMAN	Phosphorylation (STY)	S4:Phosphorylation (STY):22.45	PEAKS DB
LRGRAVPVWDVLASGY(+79.97)VSGAAREELLAEFGSGT(+79.97)LDLPALT(+79.97)R	21.43	4552.2	41	8.9	651.327	50.03						0	6	F6:18742	3P_AZD_2uM_1D_Ppetide_Tyr_IP_AZD3.raw	0	0	0	0	0	0	0	tr|A0A075B730|A0A075B730_HUMAN:sp|P58107|EPIPL_HUMAN	Phosphorylation (STY)	Y16:Phosphorylation (STY):0.00;T33:Phosphorylation (STY):0.00;T40:Phosphorylation (STY):0.00	PEAKS DB
N(+.98)GHS(+79.97)ARQHVVADTEL	21.32	1713.75	15	1.1	572.257	19.61						388000	6	F6:6416	3P_AZD_2uM_1D_Ppetide_Tyr_IP_AZD3.raw	1	0	0	0	0	0	1	sp|P28906|CD34_HUMAN	Deamidation (NQ); Phosphorylation (STY)	N1:Deamidation (NQ):4.12;S4:Phosphorylation (STY):38.24	PEAKS DB
WN(+.98)MLKDEDKDLFPLLEC(+57.02)LSSVATALQSGFLPYC(+57.02)EPVY(+79.97)QRC(+57.02)VNLVQ(+.98)K	21.29	5555.62	46	9.6	926.953	28.15				0			4	F4:10173	3P_AZD_2uM_1D_Ppetide_Tyr_IP_AZD1.raw	0	0	0	0	0	0	0	sp|Q92973|TNPO1_HUMAN	Deamidation (NQ); Carbamidomethylation; Phosphorylation (STY)	N2:Deamidation (NQ):2.07;C17:Carbamidomethylation:1000.00;C33:Carbamidomethylation:1000.00;Y37:Phosphorylation (STY):0.00;C40:Carbamidomethylation:1000.00;Q45:Deamidation (NQ):0.18	PEAKS DB
TATEPQY(+79.97)QPGENL	21.27	1526.63	13	1.4	764.323	27.8		1940000	1670000			398000	2	F2:11073	3P_AZD_2uM_1D_Ppetide_Tyr_IP_CTL2.raw	3	0	1	1	0	0	1	sp|P06241|FYN_HUMAN:sp|P07947|YES_HUMAN:tr|J3QRU1|J3QRU1_HUMAN	Phosphorylation (STY)	Y7:Phosphorylation (STY):9.85	PEAKS DB
KGGFS(+79.97)IFWADDGLDTGDLLLQKEC(+57.02)EVLPDDTVSTLYN(+.98)RFLFPEGIK	21.23	5299.54	46	-1.5	884.262	28.87						208000	6	F6:10096	3P_AZD_2uM_1D_Ppetide_Tyr_IP_AZD3.raw	1	0	0	0	0	0	1	sp|O75891|AL1L1_HUMAN	Phosphorylation (STY); Carbamidomethylation; Deamidation (NQ)	S5:Phosphorylation (STY):0.00;C24:Carbamidomethylation:1000.00;N37:Deamidation (NQ):0.00	PEAKS DB
IEDNEY(+79.97)TAR	21.04	1189.47	9	1.3	595.741	10.45	78200	46000	71400		18400		1	F1:2720	3P_AZD_2uM_1D_Ppetide_Tyr_IP_CTL1.raw	4	1	1	1	0	1	0	sp|P07948|LYN_HUMAN:sp|P06241|FYN_HUMAN:sp|P07947|YES_HUMAN:tr|J3QRU1|J3QRU1_HUMAN:sp|P12931|SRC_HUMAN:tr|H0Y3C5|H0Y3C5_HUMAN:sp|P08631|HCK_HUMAN:tr|F6SF04|F6SF04_HUMAN:tr|J3KPD6|J3KPD6_HUMAN	Phosphorylation (STY)	Y6:Phosphorylation (STY):8.14	PEAKS DB
ANLT(+79.97)ILFDKY	20.99	1276.61	10	-9.8	639.306	54.2			73500				3	F3:21065	3P_AZD_2uM_1D_Ppetide_Tyr_IP_CTL3.raw	1	0	0	1	0	0	0	sp|Q96DT5|DYH11_HUMAN:tr|A0A0C4DFR0|A0A0C4DFR0_HUMAN:tr|A0A087WYC6|A0A087WYC6_HUMAN:tr|E7EP17|E7EP17_HUMAN	Phosphorylation (STY)	T4:Phosphorylation (STY):56.47	PEAKS DB
SPSSC(+57.02)NDLYAT(+79.97)VK	20.97	1520.62	13	1.2	761.319	21.92		108000	80500				2	F2:8467	3P_AZD_2uM_1D_Ppetide_Tyr_IP_CTL2.raw	2	0	1	1	0	0	0	sp|Q9NWQ8|PHAG1_HUMAN	Carbamidomethylation; Phosphorylation (STY)	C5:Carbamidomethylation:1000.00;T11:Phosphorylation (STY):0.00	PEAKS DB
HALLAY(+79.97)TLGVK	20.93	1264.66	11	2.3	633.338	41.88		59500	60300				3	F3:17182	3P_AZD_2uM_1D_Ppetide_Tyr_IP_CTL3.raw	2	0	1	1	0	0	0	sp|P68104|EF1A1_HUMAN	Phosphorylation (STY)	Y6:Phosphorylation (STY):7.65	PEAKS DB
TGLSIQ(+.98)NSSLFPILLHFHIMEAMLYALLNKTFAQDGQ(+.98)HQVLS(+79.97)MNR	20.8	5208.56	45	-0.1	1042.72	57.77				0			4	F4:22752	3P_AZD_2uM_1D_Ppetide_Tyr_IP_AZD1.raw	0	0	0	0	0	0	0	sp|Q96QE5|TEFM_HUMAN	Deamidation (NQ); Phosphorylation (STY)	Q6:Deamidation (NQ):17.01;Q37:Deamidation (NQ):0.00;S42:Phosphorylation (STY):0.00	PEAKS DB
VPVTLALNNTLFLIEERQY(+79.97)MPWEAALSSLSYFKLMFDRS(+79.97)EVYGPM(+15.99)K	20.55	5572.66	46	3	797.104	25.14				44200			4	F4:8983	3P_AZD_2uM_1D_Ppetide_Tyr_IP_AZD1.raw	1	0	0	0	1	0	0	sp|P15144|AMPN_HUMAN	Phosphorylation (STY); Oxidation (M)	Y19:Phosphorylation (STY):0.00;S39:Phosphorylation (STY):0.00;M45:Oxidation (M):0.00	PEAKS DB
AS(+79.97)PAPGSGHPEGPGAHLDMNSLDR	20.38	2449.05	24	1	817.357	28.36		61600					2	F2:11448	3P_AZD_2uM_1D_Ppetide_Tyr_IP_CTL2.raw	1	0	1	0	0	0	0	sp|O94826|TOM70_HUMAN	Phosphorylation (STY)	S2:Phosphorylation (STY):23.70	PEAKS DB
ASVNRGAQEN(+.98)GT(+79.97)GQATSRNGHSARQHVVADTEL	20.34	3498.6	33	0.2	875.657	15.81				186000	260000		5	F5:5052	3P_AZD_2uM_1D_Ppetide_Tyr_IP_AZD2.raw	2	0	0	0	1	1	0	sp|P28906|CD34_HUMAN	Deamidation (NQ); Phosphorylation (STY)	N10:Deamidation (NQ):8.26;T12:Phosphorylation (STY):0.00	PEAKS DB
IYETDY(+79.97)YRK	20.33	1329.56	9	1.2	665.79	14.62	184000	166000	159000				2	F2:4918	3P_AZD_2uM_1D_Ppetide_Tyr_IP_CTL2.raw	3	1	1	1	0	0	0	sp|P06213|INSR_HUMAN:tr|C9J5X1|C9J5X1_HUMAN:sp|P08069|IGF1R_HUMAN	Phosphorylation (STY)	Y6:Phosphorylation (STY):10.11	PEAKS DB
MVVESAY(+79.97)EVIK	20.16	1346.62	11	1.6	674.318	40	37200						1	F1:15857	3P_AZD_2uM_1D_Ppetide_Tyr_IP_CTL1.raw	1	1	0	0	0	0	0	sp|P07195|LDHB_HUMAN	Phosphorylation (STY)	Y7:Phosphorylation (STY):0.00	PEAKS DB
YT(+79.97)ATESQYQQQP	20.08	1522.6	12	0.6	762.307	15.98				685000			4	F4:5120	3P_AZD_2uM_1D_Ppetide_Tyr_IP_AZD1.raw	1	0	0	0	1	0	0	tr|H0Y3C5|H0Y3C5_HUMAN:sp|P08631|HCK_HUMAN:tr|F6SF04|F6SF04_HUMAN:tr|J3KPD6|J3KPD6_HUMAN	Phosphorylation (STY)	T2:Phosphorylation (STY):0.00	PEAKS DB
AC(+57.02)SVAGSWVC(+57.02)PRPLARSDSENVYEVIQDLHVPPREESAEQVDDPPEPVY(+79.97)ANIERQPR	20.05	6593.08	57	4.3	1099.86	48.91						219000	6	F6:18219	3P_AZD_2uM_1D_Ppetide_Tyr_IP_AZD3.raw	1	0	0	0	0	0	1	tr|A0A0G2JRG8|A0A0G2JRG8_HUMAN:tr|A0A0G2JNY3|A0A0G2JNY3_HUMAN	Carbamidomethylation; Phosphorylation (STY)	C2:Carbamidomethylation:1000.00;C10:Carbamidomethylation:1000.00;Y49:Phosphorylation (STY):0.00	PEAKS DB
RPPS(+79.97)PEPSTK	20.04	1174.54	10	2.2	588.278	8.46		41800					2	F2:1963	3P_AZD_2uM_1D_Ppetide_Tyr_IP_CTL2.raw	1	0	1	0	0	0	0	sp|Q01082|SPTB2_HUMAN:tr|A0A087WUZ3|A0A087WUZ3_HUMAN	Phosphorylation (STY)	S4:Phosphorylation (STY):33.81	PEAKS DB
SIN(+.98)PLGGFVHYGEVTN(+.98)DFVMLKGC(+57.02)VVGT(+79.97)K	20	3219.5	29	0.9	644.908	54.04						179000	6	F6:20201	3P_AZD_2uM_1D_Ppetide_Tyr_IP_AZD3.raw	1	0	0	0	0	0	1	sp|P39023|RL3_HUMAN	Deamidation (NQ); Carbamidomethylation; Phosphorylation (STY)	N3:Deamidation (NQ):1000.00;N16:Deamidation (NQ):1000.00;C24:Carbamidomethylation:1000.00;T28:Phosphorylation (STY):0.00	PEAKS DB
A(+42.01)ADVSVTHRPPLS(+79.97)PK	19.77	1695.83	15	1	566.286	29.75	112000		114000				1	F1:11652	3P_AZD_2uM_1D_Ppetide_Tyr_IP_CTL1.raw	2	1	0	1	0	0	0	tr|A0A087WZ13|A0A087WZ13_HUMAN:tr|E9PAU2|E9PAU2_HUMAN	Acetylation (Protein N-term); Phosphorylation (STY)	A1:Acetylation (Protein N-term):1000.00;S13:Phosphorylation (STY):7.23	PEAKS DB
VY(+79.97)HLISVMILGRVIMQ(+.98)IIKDMVLSRT(+79.97)R	19.71	3344.73	27	-5.7	837.186	49.88					0		5	F5:18866	3P_AZD_2uM_1D_Ppetide_Tyr_IP_AZD2.raw	0	0	0	0	0	0	0	sp|Q9H6L5|RETR1_HUMAN	Phosphorylation (STY); Deamidation (NQ)	Y2:Phosphorylation (STY):42.68;Q16:Deamidation (NQ):1000.00;T26:Phosphorylation (STY):0.00	PEAKS DB
IRKGHGQPGADAEKPFY(+79.97)VNVEFHHER	19.7	3097.47	26	0.3	620.501	20.7				87000			4	F4:7178	3P_AZD_2uM_1D_Ppetide_Tyr_IP_AZD1.raw	1	0	0	0	1	0	0	sp|P11274|BCR_HUMAN	Phosphorylation (STY)	Y17:Phosphorylation (STY):1000.00	PEAKS DB
IYETDY(+79.97)YR	19.7	1201.47	8	1.5	601.743	20.37	66900	82200	67200				2	F2:7698	3P_AZD_2uM_1D_Ppetide_Tyr_IP_CTL2.raw	3	1	1	1	0	0	0	sp|P06213|INSR_HUMAN:tr|C9J5X1|C9J5X1_HUMAN:sp|P08069|IGF1R_HUMAN	Phosphorylation (STY)	Y6:Phosphorylation (STY):11.06	PEAKS DB
KAEGEPQEES(+79.97)PLKSK	19.66	1735.8	15	-0.1	579.608	11.04				34000			4	F4:2842	3P_AZD_2uM_1D_Ppetide_Tyr_IP_AZD1.raw	1	0	0	0	1	0	0	tr|A0A1W2PQ43|A0A1W2PQ43_HUMAN:tr|E9PK09|E9PK09_HUMAN:tr|E9PQN2|E9PQN2_HUMAN:tr|E9PKI6|E9PKI6_HUMAN:sp|Q9NYF8|BCLF1_HUMAN:tr|E9PK91|E9PK91_HUMAN:tr|E9PJA7|E9PJA7_HUMAN	Phosphorylation (STY)	S10:Phosphorylation (STY):2.44	PEAKS DB
KPIFTHPMPS(+79.97)PEAVIQ(+.98)TRC(+57.02)PAHAPSSSFTVMALGPPK	19.63	4064.97	37	-5.8	813.997	21.18					223000		5	F5:7253	3P_AZD_2uM_1D_Ppetide_Tyr_IP_AZD2.raw	1	0	0	0	0	1	0	tr|A0A0A0MS79|A0A0A0MS79_HUMAN	Phosphorylation (STY); Deamidation (NQ); Carbamidomethylation	S10:Phosphorylation (STY):0.00;Q16:Deamidation (NQ):1000.00;C19:Carbamidomethylation:1000.00	PEAKS DB
LGPGLVDQERS(+79.97)LSLSNVK	19.56	1991.01	18	-2.1	498.758	39.28				43200			4	F4:15036	3P_AZD_2uM_1D_Ppetide_Tyr_IP_AZD1.raw	1	0	0	0	1	0	0	sp|O15417|TNC18_HUMAN:tr|H9KVB4|H9KVB4_HUMAN	Phosphorylation (STY)	S11:Phosphorylation (STY):0.00	PEAKS DB
VAGAAT(+79.97)PK	19.51	793.374	8	-3	397.693	11.14		15200					2	F2:3222	3P_AZD_2uM_1D_Ppetide_Tyr_IP_CTL2.raw	1	0	1	0	0	0	0	sp|P16402|H13_HUMAN	Phosphorylation (STY)	T6:Phosphorylation (STY):1000.00	PEAKS DB
LHLSVLQVLMT(+79.97)LQLHLTEK	19.49	2295.24	19	-7.3	766.083	39.95			56800				3	F3:16333	3P_AZD_2uM_1D_Ppetide_Tyr_IP_CTL3.raw	1	0	0	1	0	0	0	sp|Q96N11|CG026_HUMAN	Phosphorylation (STY)	T11:Phosphorylation (STY):0.00	PEAKS DB
SDLSLIQQQQQQQQQQQQQQKQLEEAEEERTEVPGATS(+79.97)TLTVPVSV	19.4	5299.55	46	2.9	884.268	31.39					0		5	F5:11241	3P_AZD_2uM_1D_Ppetide_Tyr_IP_AZD2.raw	0	0	0	0	0	0	0	sp|Q6P995|F171B_HUMAN	Phosphorylation (STY)	S38:Phosphorylation (STY):0.00	PEAKS DB
KKTDELPQ(+.98)LVTLPHPNLHGPEILDVPSTVQKTPFVTHPGYDTGNGIQLPGT(+79.97)SGQQPS	19.36	6161.08	57	1.3	881.163	33.42					0		5	F5:11929	3P_AZD_2uM_1D_Ppetide_Tyr_IP_AZD2.raw	0	0	0	0	0	0	0	sp|P02751|FINC_HUMAN	Deamidation (NQ); Phosphorylation (STY)	Q8:Deamidation (NQ):0.00;T51:Phosphorylation (STY):0.00	PEAKS DB
EATQPEPIYAEST(+79.97)K	19.28	1642.71	14	2	822.365	20.8	65400						1	F1:7724	3P_AZD_2uM_1D_Ppetide_Tyr_IP_CTL1.raw	1	1	0	0	0	0	0	sp|Q86YV5|PRAG1_HUMAN	Phosphorylation (STY)	T13:Phosphorylation (STY):0.00	PEAKS DB
LLT(+79.97)EFN(+.98)KSTDAYELK	19.26	1851.85	15	7.6	618.297	39.34		220000					2	F2:16323	3P_AZD_2uM_1D_Ppetide_Tyr_IP_CTL2.raw	1	0	1	0	0	0	0	sp|P48594|SPB4_HUMAN:tr|H0Y5H9|H0Y5H9_HUMAN:sp|P29508|SPB3_HUMAN	Phosphorylation (STY); Deamidation (NQ)	T3:Phosphorylation (STY):10.19;N6:Deamidation (NQ):1000.00	PEAKS DB
EATQPEPIYAES(+79.97)TK	19.26	1642.71	14	1.9	822.365	20.74						31700	6	F6:6899	3P_AZD_2uM_1D_Ppetide_Tyr_IP_AZD3.raw	1	0	0	0	0	0	1	sp|Q86YV5|PRAG1_HUMAN	Phosphorylation (STY)	S12:Phosphorylation (STY):0.00	PEAKS DB
T(+42.01)QHRKKC(+57.02)QGPVSFAES(+79.97)WAAQQQ(+.98)AGR	19.18	2978.36	25	0.1	745.597	25.44			33100				3	F3:9989	3P_AZD_2uM_1D_Ppetide_Tyr_IP_CTL3.raw	1	0	0	1	0	0	0	tr|C9JJK5|C9JJK5_HUMAN	Acetylation (Protein N-term); Carbamidomethylation; Phosphorylation (STY); Deamidation (NQ)	T1:Acetylation (Protein N-term):1000.00;C7:Carbamidomethylation:1000.00;S16:Phosphorylation (STY):0.00;Q22:Deamidation (NQ):0.94	PEAKS DB
KGSELWLGVDALGLN(+.98)IYEQNDRLT(+79.97)PK	19.16	3009.48	26	-5.9	753.374	34.28						10100	6	F6:12148	3P_AZD_2uM_1D_Ppetide_Tyr_IP_AZD3.raw	1	0	0	0	0	0	1	sp|P26038|MOES_HUMAN	Deamidation (NQ); Phosphorylation (STY)	N15:Deamidation (NQ):0.00;T24:Phosphorylation (STY):11.79	PEAKS DB
N(+.98)DITPY(+79.97)LVSR	19.12	1257.56	10	1.8	629.79	41.75	76600	85400					1	F1:16586	3P_AZD_2uM_1D_Ppetide_Tyr_IP_CTL1.raw	2	1	1	0	0	0	0	sp|Q13523|PRP4B_HUMAN:tr|H0YDJ3|H0YDJ3_HUMAN	Deamidation (NQ); Phosphorylation (STY)	N1:Deamidation (NQ):1000.00;Y6:Phosphorylation (STY):10.22	PEAKS DB
KIKST(+79.97)N(+.98)PGISIGDVAK	18.97	1707.88	16	0.5	427.978	23.01		0					2	F2:8941	3P_AZD_2uM_1D_Ppetide_Tyr_IP_CTL2.raw	0	0	0	0	0	0	0	sp|O15347|HMGB3_HUMAN	Phosphorylation (STY); Deamidation (NQ)	T5:Phosphorylation (STY):0.00;N6:Deamidation (NQ):1000.00	PEAKS DB
VVGSSGTQEASVLVT(+79.97)IQQRLSGSHSQGVAY(+79.97)PVRIES(+79.97)SSASLAN	18.93	4596.13	43	8.1	920.241	29.94					49500		5	F5:10574	3P_AZD_2uM_1D_Ppetide_Tyr_IP_AZD2.raw	1	0	0	0	0	1	0	sp|P98160|PGBM_HUMAN	Phosphorylation (STY)	T15:Phosphorylation (STY):0.00;Y30:Phosphorylation (STY):0.00;S36:Phosphorylation (STY):0.00	PEAKS DB
FYT(+79.97)ATEGQYQQQP	18.81	1639.66	13	1.1	820.836	27.63		8450000		3550000			2	F2:11228	3P_AZD_2uM_1D_Ppetide_Tyr_IP_CTL2.raw	2	0	1	0	1	0	0	sp|P07948|LYN_HUMAN	Phosphorylation (STY)	T3:Phosphorylation (STY):0.00	PEAKS DB
EPENINAALQETEAPYIS(+79.97)IAC(+57.02)DLIK	18.78	2881.35	25	8.5	721.35	47.39				2500000			4	F4:18600	3P_AZD_2uM_1D_Ppetide_Tyr_IP_AZD1.raw	1	0	0	0	1	0	0	sp|Q9NQC3|RTN4_HUMAN	Phosphorylation (STY); Carbamidomethylation	S18:Phosphorylation (STY):0.00;C21:Carbamidomethylation:1000.00	PEAKS DB
IDASKNEEDEGHS(+79.97)NSSPR	18.76	2050.82	18	0.5	684.615	6.97			40200				3	F3:1441	3P_AZD_2uM_1D_Ppetide_Tyr_IP_CTL3.raw	1	0	0	1	0	0	0	sp|Q14103|HNRPD_HUMAN	Phosphorylation (STY)	S13:Phosphorylation (STY):0.00	PEAKS DB
KLAKLY(+79.97)KVSNGAGTMSVS(+79.97)LVADENPFAQ(+.98)GALK	18.64	3467.68	32	2.2	867.929	46.61						0	6	F6:17300	3P_AZD_2uM_1D_Ppetide_Tyr_IP_AZD3.raw	0	0	0	0	0	0	0	tr|A0A0A0MS51|A0A0A0MS51_HUMAN:tr|A0A0A0MT01|A0A0A0MT01_HUMAN:sp|P06396|GELS_HUMAN	Phosphorylation (STY); Deamidation (NQ)	Y6:Phosphorylation (STY):0.00;S18:Phosphorylation (STY):0.00;Q28:Deamidation (NQ):2.87	PEAKS DB
KAT(+79.97)GPPVS(+79.97)ELITK	18.52	1499.7	13	-9	750.852	39.55	7250						1	F1:15674	3P_AZD_2uM_1D_Ppetide_Tyr_IP_CTL1.raw	1	1	0	0	0	0	0	sp|P16401|H15_HUMAN	Phosphorylation (STY)	T3:Phosphorylation (STY):0.00;S8:Phosphorylation (STY):0.00	PEAKS DB
KLY(+79.97)DFVK	18.52	991.478	7	1.3	496.747	23.85	114000		123000				1	F1:9161	3P_AZD_2uM_1D_Ppetide_Tyr_IP_CTL1.raw	2	1	0	1	0	0	0	sp|Q92835|SHIP1_HUMAN	Phosphorylation (STY)	Y3:Phosphorylation (STY):1000.00	PEAKS DB
KGGFSIFWADDGLDT(+79.97)GDLLLQKEC(+57.02)EVLPDDTVSTLYNRFLFPEGIK	18.44	5298.55	46	-3.8	884.096	28.98						62300	6	F6:10096	3P_AZD_2uM_1D_Ppetide_Tyr_IP_AZD3.raw	1	0	0	0	0	0	1	sp|O75891|AL1L1_HUMAN	Phosphorylation (STY); Carbamidomethylation	T15:Phosphorylation (STY):0.00;C24:Carbamidomethylation:1000.00	PEAKS DB
NEEENIYS(+79.97)VPHDSTQGK	18.41	2025.83	17	2.1	676.286	18.01						303000	6	F6:5732	3P_AZD_2uM_1D_Ppetide_Tyr_IP_AZD3.raw	1	0	0	0	0	0	1	sp|Q9NRY4|RHG35_HUMAN	Phosphorylation (STY)	S8:Phosphorylation (STY):0.00	PEAKS DB
FSDY(+79.97)ANFK	18.39	1070.41	8	1.1	536.213	25.45	139000		118000				1	F1:9885	3P_AZD_2uM_1D_Ppetide_Tyr_IP_CTL1.raw	2	1	0	1	0	0	0	sp|P23469|PTPRE_HUMAN:sp|P18433|PTPRA_HUMAN	Phosphorylation (STY)	Y4:Phosphorylation (STY):24.32	PEAKS DB
KNT(+79.97)PFLYDLVMTHALQWPSLTVQWLPEVTKPEGKDYALHWLVLGTHTSDEQN(+.98)HLVVAR	18.33	6802.41	58	-6.6	972.774	33.29				24100			4	F4:12409	3P_AZD_2uM_1D_Ppetide_Tyr_IP_AZD1.raw	1	0	0	0	1	0	0	sp|Q16576|RBBP7_HUMAN	Phosphorylation (STY); Deamidation (NQ)	T3:Phosphorylation (STY):0.00;N52:Deamidation (NQ):0.00	PEAKS DB
KYVS(+79.97)QYYPKLRVDIRPQLLK	18.31	2586.41	20	-6	647.606	40.03						5640	6	F6:14587	3P_AZD_2uM_1D_Ppetide_Tyr_IP_AZD3.raw	1	0	0	0	0	0	1	sp|Q5SSJ5|HP1B3_HUMAN	Phosphorylation (STY)	S4:Phosphorylation (STY):0.00	PEAKS DB
KGIPPGSDLPSVSETDETATHSQ(+.98)TDLSQIT(+79.97)KATSQGNT(+79.97)ASQVILGKGT	18.27	5013.34	48	5.7	1003.68	30.89				446000			4	F4:11290	3P_AZD_2uM_1D_Ppetide_Tyr_IP_AZD1.raw	1	0	0	0	1	0	0	sp|Q8N7X0|ADGB_HUMAN	Deamidation (NQ); Phosphorylation (STY)	Q23:Deamidation (NQ):7.38;T30:Phosphorylation (STY):0.00;T38:Phosphorylation (STY):0.00	PEAKS DB
ILT(+79.97)PLVSLDTPGK	18.05	1432.76	13	4.8	717.39	50.01				0			4	F4:19645	3P_AZD_2uM_1D_Ppetide_Tyr_IP_AZD1.raw	0	0	0	0	0	0	0		Phosphorylation (STY)	T3:Phosphorylation (STY):25.70	PEAKS DB
SLYY(+79.97)YIQQDTK	17.96	1500.65	11	2	751.336	43.71			78000				3	F3:17882	3P_AZD_2uM_1D_Ppetide_Tyr_IP_CTL3.raw	1	0	0	1	0	0	0	sp|P07355|ANXA2_HUMAN	Phosphorylation (STY)	Y4:Phosphorylation (STY):10.11	PEAKS DB
GIPLT(+79.97)PQQAQ(+.98)ALGITLTPKQVQELGIPLTPQQAQALGIT(+79.97)LTPK	17.85	4632.46	43	-5.3	927.494	43.62				92900			4	F4:16928	3P_AZD_2uM_1D_Ppetide_Tyr_IP_AZD1.raw	1	0	0	0	1	0	0	sp|A6NE01|F186A_HUMAN:tr|F5GYN0|F5GYN0_HUMAN	Phosphorylation (STY); Deamidation (NQ)	T5:Phosphorylation (STY):0.00;Q10:Deamidation (NQ):0.00;T39:Phosphorylation (STY):0.00	PEAKS DB
KTKPLATT(+79.97)QPAK	17.81	1362.73	12	-2.4	455.249	17.32					79800		5	F5:5816	3P_AZD_2uM_1D_Ppetide_Tyr_IP_AZD2.raw	1	0	0	0	0	1	0	tr|E7EVA0|E7EVA0_HUMAN	Phosphorylation (STY)	T8:Phosphorylation (STY):0.00	PEAKS DB
LDY(+79.97)VGLDTTK	17.81	1203.54	10	0	602.778	29.48			36500				3	F3:11761	3P_AZD_2uM_1D_Ppetide_Tyr_IP_CTL3.raw	1	0	0	1	0	0	0	sp|Q16836|HCDH_HUMAN:tr|A0A0A0MSE2|A0A0A0MSE2_HUMAN:tr|A0A0D9SFP2|A0A0D9SFP2_HUMAN:tr|E9PF18|E9PF18_HUMAN	Phosphorylation (STY)	Y3:Phosphorylation (STY):61.26	PEAKS DB
KENSGAAEKPVT(+79.97)IHATPEGTSEAC(+57.02)RM(+15.99)ILEIMQK	17.78	3721.75	33	0.8	931.446	34.81					63500		5	F5:12491	3P_AZD_2uM_1D_Ppetide_Tyr_IP_AZD2.raw	1	0	0	0	0	1	0	sp|Q9Y6M1|IF2B2_HUMAN	Phosphorylation (STY); Carbamidomethylation; Oxidation (M)	T12:Phosphorylation (STY):0.00;C24:Carbamidomethylation:1000.00;M26:Oxidation (M):0.00	PEAKS DB
TINAWVENKTN(+.98)GKVANLFGKST(+79.97)IDPS(+79.97)SVMVLVN	17.7	3706.77	33	-2.2	927.698	46.52					39000		5	F5:17429	3P_AZD_2uM_1D_Ppetide_Tyr_IP_AZD2.raw	1	0	0	0	0	1	0	tr|F5GYW9|F5GYW9_HUMAN	Deamidation (NQ); Phosphorylation (STY)	N11:Deamidation (NQ):0.00;T22:Phosphorylation (STY):0.00;S26:Phosphorylation (STY):0.00	PEAKS DB
EYDKAVQSYKDVFS(+79.97)YLPTDNKVMLELAQLY(+79.97)LLQGHLDLC(+57.02)EQHC(+57.02)AILLQT(+79.97)EQNHET	17.69	6791.08	55	7.2	1132.86	48.9				0			4	F4:19154	3P_AZD_2uM_1D_Ppetide_Tyr_IP_AZD1.raw	0	0	0	0	0	0	0	tr|A0A0B4J1Y2|A0A0B4J1Y2_HUMAN	Phosphorylation (STY); Carbamidomethylation	S14:Phosphorylation (STY):0.00;Y30:Phosphorylation (STY):0.00;C39:Carbamidomethylation:1000.00;C43:Carbamidomethylation:1000.00;T49:Phosphorylation (STY):0.00	PEAKS DB
KAT(+79.97)DHPHPSTPATARQQIAMSAIVRSPEHQPSAMSLLAPPSSR	17.67	4636.28	43	0.8	928.264	37.6					0		5	F5:13700	3P_AZD_2uM_1D_Ppetide_Tyr_IP_AZD2.raw	0	0	0	0	0	0	0	sp|O14578|CTRO_HUMAN:tr|H7BYJ3|H7BYJ3_HUMAN	Phosphorylation (STY)	T3:Phosphorylation (STY):0.00	PEAKS DB
ETAVFINISRGDVVN(+.98)Q(+.98)DDLY(+79.97)QALASGK	17.61	3004.41	27	-2.6	752.107	26.55						512000	6	F6:9020	3P_AZD_2uM_1D_Ppetide_Tyr_IP_AZD3.raw	1	0	0	0	0	0	1	sp|Q9UBQ7|GRHPR_HUMAN	Deamidation (NQ); Phosphorylation (STY)	N15:Deamidation (NQ):9.45;Q16:Deamidation (NQ):10.19;Y20:Phosphorylation (STY):0.00	PEAKS DB
FQ(+.98)AARQALQLSSSSAWNSVQT(+79.97)AVINVFKGGGLQSNELYALNENIR	17.59	4960.45	45	8.1	709.649	29.82						2280000	6	F6:10440	3P_AZD_2uM_1D_Ppetide_Tyr_IP_AZD3.raw	1	0	0	0	0	0	1	sp|Q6MZQ0|PRR5L_HUMAN	Deamidation (NQ); Phosphorylation (STY)	Q2:Deamidation (NQ):0.00;T21:Phosphorylation (STY):0.00	PEAKS DB
AC(+57.02)AEIPVNQWPELIPQLVANVTN(+.98)PNS(+79.97)TEHMK	17.53	3580.67	31	6.2	717.146	35.24					27200		5	F5:12684	3P_AZD_2uM_1D_Ppetide_Tyr_IP_AZD2.raw	1	0	0	0	0	1	0	sp|Q14974|IMB1_HUMAN	Carbamidomethylation; Deamidation (NQ); Phosphorylation (STY)	C2:Carbamidomethylation:1000.00;N23:Deamidation (NQ):0.00;S26:Phosphorylation (STY):0.00	PEAKS DB
KDNIQAM(+15.99)VIVPT(+79.97)RELALQVSQIC(+57.02)IQVS(+79.97)K	17.45	3356.66	28	5.6	672.344	33.06						0	6	F6:11629	3P_AZD_2uM_1D_Ppetide_Tyr_IP_AZD3.raw	0	0	0	0	0	0	0	sp|P26196|DDX6_HUMAN	Oxidation (M); Phosphorylation (STY); Carbamidomethylation	M7:Oxidation (M):1000.00;T12:Phosphorylation (STY):0.00;C23:Carbamidomethylation:1000.00;S27:Phosphorylation (STY):0.00	PEAKS DB
KPM(+15.99)Q(+.98)PGPHVVKIFFAGDT(+79.97)IPKSPFVVQVGEAC(+57.02)NPNAC(+57.02)RASGR	17.41	4660.25	42	9.3	777.723	35.22					155000		5	F5:12660	3P_AZD_2uM_1D_Ppetide_Tyr_IP_AZD2.raw	1	0	0	0	0	1	0	sp|O75369|FLNB_HUMAN	Oxidation (M); Deamidation (NQ); Phosphorylation (STY); Carbamidomethylation	M3:Oxidation (M):1000.00;Q4:Deamidation (NQ):6.30;T18:Phosphorylation (STY):0.00;C32:Carbamidomethylation:1000.00;C37:Carbamidomethylation:1000.00	PEAKS DB
KPAGAT(+79.97)PK	17.4	848.416	8	-2.3	425.214	10.48					45400		5	F5:2628	3P_AZD_2uM_1D_Ppetide_Tyr_IP_AZD2.raw	1	0	0	0	0	1	0	sp|P16401|H15_HUMAN	Phosphorylation (STY)	T6:Phosphorylation (STY):1000.00	PEAKS DB
TVAIHT(+79.97)LWNIRIVVLAKPEHENRISHIC(+57.02)TDNVK	17.37	3956.06	33	-3.7	495.513	32.53					137000		5	F5:11597	3P_AZD_2uM_1D_Ppetide_Tyr_IP_AZD2.raw	1	0	0	0	0	1	0	sp|Q92835|SHIP1_HUMAN	Phosphorylation (STY); Carbamidomethylation	T6:Phosphorylation (STY):0.00;C28:Carbamidomethylation:1000.00	PEAKS DB
LEDYFT(+79.97)STEPQYQPGENL	17.34	2209.91	18	1.8	1105.96	52.93					171000		5	F5:19933	3P_AZD_2uM_1D_Ppetide_Tyr_IP_AZD2.raw	1	0	0	0	0	1	0	sp|P12931|SRC_HUMAN	Phosphorylation (STY)	T6:Phosphorylation (STY):0.00	PEAKS DB
KTKVERDIGEGN(+.98)LST(+79.97)AAAAALAAAAVK	17.34	2706.4	27	3.6	542.288	6.08				133000			4	F4:1076	3P_AZD_2uM_1D_Ppetide_Tyr_IP_AZD1.raw	1	0	0	0	1	0	0	sp|Q8TAQ2|SMRC2_HUMAN:tr|F8VXC8|F8VXC8_HUMAN	Deamidation (NQ); Phosphorylation (STY)	N12:Deamidation (NQ):1000.00;T15:Phosphorylation (STY):0.00	PEAKS DB
AVADHIPQ(+.98)LVQGVRGSQAQAEDLSAQLALIIS(+79.97)SQNFLQPGSKM(+15.99)VS	17.31	4798.4	45	4.5	960.692	43.75					34500		5	F5:16357	3P_AZD_2uM_1D_Ppetide_Tyr_IP_AZD2.raw	1	0	0	0	0	1	0	sp|Q9Y4G6|TLN2_HUMAN	Deamidation (NQ); Phosphorylation (STY); Oxidation (M)	Q8:Deamidation (NQ):0.00;S32:Phosphorylation (STY):0.00;M43:Oxidation (M):1000.00	PEAKS DB
SS(+79.97)PEQPRPSTSK	17.29	1379.61	12	2.3	690.813	7.46	119000						1	F1:1542	3P_AZD_2uM_1D_Ppetide_Tyr_IP_CTL1.raw	1	1	0	0	0	0	0	sp|P29590|PML_HUMAN	Phosphorylation (STY)	S2:Phosphorylation (STY):0.00	PEAKS DB
KGFDIALN(+.98)LLFAMAFLASTFS(+79.97)ILAVSERAVQAK	17.26	3622.89	33	6.2	725.589	51.03				18700			4	F4:19995	3P_AZD_2uM_1D_Ppetide_Tyr_IP_AZD1.raw	1	0	0	0	1	0	0	tr|H0Y3H2|H0Y3H2_HUMAN	Deamidation (NQ); Phosphorylation (STY)	N8:Deamidation (NQ):4.32;S21:Phosphorylation (STY):0.00	PEAKS DB
GHEY(+79.97)TNIK	17.23	1040.43	8	0.3	521.224	8.2		14300					2	F2:1862	3P_AZD_2uM_1D_Ppetide_Tyr_IP_CTL2.raw	1	0	1	0	0	0	0	sp|Q06124|PTN11_HUMAN	Phosphorylation (STY)	Y4:Phosphorylation (STY):0.00	PEAKS DB
KEHGMLTRQ(+.98)LQQT(+79.97)EKELK	17.21	2277.12	18	1.5	380.528	6.75						13200	6	F6:1425	3P_AZD_2uM_1D_Ppetide_Tyr_IP_AZD3.raw	1	0	0	0	0	0	1	sp|Q8NDV3|SMC1B_HUMAN	Deamidation (NQ); Phosphorylation (STY)	Q9:Deamidation (NQ):0.00;T13:Phosphorylation (STY):0.00	PEAKS DB
KAFLHWYTGEGM(+15.99)DEMEFT(+79.97)EAESNMNDLVSEY(+79.97)QQYQDATAEEEGEMYEDDEEESEAQGPK	17.16	7064.71	59	0.9	884.097	45.55					215000		5	F5:17166	3P_AZD_2uM_1D_Ppetide_Tyr_IP_AZD2.raw	1	0	0	0	0	1	0	sp|Q13509|TBB3_HUMAN	Oxidation (M); Phosphorylation (STY)	M12:Oxidation (M):0.00;T18:Phosphorylation (STY):0.00;Y31:Phosphorylation (STY):0.00	PEAKS DB
RC(+57.02)AVAAT(+79.97)T(+79.97)R	17.15	1164.45	9	9.7	583.239	11.67	36800		28500				1	F1:3298	3P_AZD_2uM_1D_Ppetide_Tyr_IP_CTL1.raw	2	1	0	1	0	0	0	sp|P20674|COX5A_HUMAN	Carbamidomethylation; Phosphorylation (STY)	C2:Carbamidomethylation:1000.00;T7:Phosphorylation (STY):1000.00;T8:Phosphorylation (STY):1000.00	PEAKS DB
LGEDPY(+79.97)YTENGGGQ(+.98)GYSSGPGTSPEAQGK	17.14	2983.2	29	9.5	995.418	27.73	16300						1	F1:10757	3P_AZD_2uM_1D_Ppetide_Tyr_IP_CTL1.raw	1	1	0	0	0	0	0	sp|P28906|CD34_HUMAN	Phosphorylation (STY); Deamidation (NQ)	Y6:Phosphorylation (STY):0.00;Q14:Deamidation (NQ):0.00	PEAKS DB
KEYEGGLGQQDANENVHPMSPDTKLVTIEPPNPINPSTNC(+57.02)NGLKENPHC(+57.02)GGS(+79.97)VTMPPINLT	17.14	6687.08	61	-3.8	1115.52	48.8					0		5	F5:18399	3P_AZD_2uM_1D_Ppetide_Tyr_IP_AZD2.raw	0	0	0	0	0	0	0	tr|B4DX41|B4DX41_HUMAN	Carbamidomethylation; Phosphorylation (STY)	C40:Carbamidomethylation:1000.00;C49:Carbamidomethylation:1000.00;S52:Phosphorylation (STY):0.00	PEAKS DB
LDS(+79.97)KVN(+.98)IIPIIAKADAISKSELT(+79.97)K	17.08	2727.41	24	8	455.579	17.26					92100		5	F5:5816	3P_AZD_2uM_1D_Ppetide_Tyr_IP_AZD2.raw	1	0	0	0	0	1	0	tr|B1AMS2|B1AMS2_HUMAN:sp|Q14141|SEPT6_HUMAN	Phosphorylation (STY); Deamidation (NQ)	S3:Phosphorylation (STY):0.00;N6:Deamidation (NQ):1000.00;T23:Phosphorylation (STY):0.00	PEAKS DB
VDGVRT(+79.97)PFLLSGTSYK	17.07	1818.89	16	-0.3	607.304	40	61200		57000				3	F3:16345	3P_AZD_2uM_1D_Ppetide_Tyr_IP_CTL3.raw	2	1	0	1	0	0	0	sp|P55084|ECHB_HUMAN	Phosphorylation (STY)	T6:Phosphorylation (STY):76.17	PEAKS DB
QKEST(+79.97)LHLVLR	17.07	1402.73	11	-8.7	468.581	24.77			18700				3	F3:9652	3P_AZD_2uM_1D_Ppetide_Tyr_IP_CTL3.raw	1	0	0	1	0	0	0	sp|P62979|RS27A_HUMAN	Phosphorylation (STY)	T5:Phosphorylation (STY):0.00	PEAKS DB
ALLDTAKMLVAEQAVGAGQLQ(+.98)VGLGISN(+.98)LSKSIGTS(+79.97)QIFLER	16.99	4408.3	42	-4.6	882.663	46.25				0			4	F4:18077	3P_AZD_2uM_1D_Ppetide_Tyr_IP_AZD1.raw	0	0	0	0	0	0	0	sp|Q96MT0|YJ006_HUMAN	Deamidation (NQ); Phosphorylation (STY)	Q21:Deamidation (NQ):0.00;N28:Deamidation (NQ):0.00;S36:Phosphorylation (STY):0.00	PEAKS DB
ALPQNDDHY(+79.97)VMQEHR	16.96	1931.8	15	1	644.941	17.58			54500				3	F3:6267	3P_AZD_2uM_1D_Ppetide_Tyr_IP_CTL3.raw	1	0	0	1	0	0	0	sp|Q07912|ACK1_HUMAN:tr|C9J1X3|C9J1X3_HUMAN	Phosphorylation (STY)	Y9:Phosphorylation (STY):1000.00	PEAKS DB
AIT(+79.97)FLQSATRLTGGK	16.94	1642.84	15	-0.1	548.622	30.8			0				3	F3:12341	3P_AZD_2uM_1D_Ppetide_Tyr_IP_CTL3.raw	0	0	0	0	0	0	0	sp|P35249|RFC4_HUMAN	Phosphorylation (STY)	T3:Phosphorylation (STY):11.01	PEAKS DB
GTGPALMAYVAEN(+.98)SVLFMC(+57.02)Y(+79.97)GFC(+57.02)QQFVRKVAGMDK	16.93	4025.8	35	4.4	1007.46	32.76			0				3	F3:13168	3P_AZD_2uM_1D_Ppetide_Tyr_IP_CTL3.raw	0	0	0	0	0	0	0	sp|Q9BXI2|ORNT2_HUMAN	Deamidation (NQ); Carbamidomethylation; Phosphorylation (STY)	N13:Deamidation (NQ):16.94;C19:Carbamidomethylation:1000.00;Y20:Phosphorylation (STY):16.94;C23:Carbamidomethylation:1000.00	PEAKS DB
FTSTEPQ(+.98)Y(+79.97)Q(+.98)PGENL	16.93	1691.66	14	1.2	846.838	35.11			0				3	F3:14195	3P_AZD_2uM_1D_Ppetide_Tyr_IP_CTL3.raw	0	0	0	0	0	0	0	sp|P12931|SRC_HUMAN	Deamidation (NQ); Phosphorylation (STY)	Q7:Deamidation (NQ):0.00;Y8:Phosphorylation (STY):18.93;Q9:Deamidation (NQ):9.85	PEAKS DB
KT(+79.97)LETYQQLFYLLQTNPLYLAKLIFQMPQNKS(+79.97)TK	16.89	4263.15	34	4.8	853.641	35.11				194000			4	F4:13130	3P_AZD_2uM_1D_Ppetide_Tyr_IP_AZD1.raw	1	0	0	0	1	0	0	sp|Q13576|IQGA2_HUMAN	Phosphorylation (STY)	T2:Phosphorylation (STY):0.00;S32:Phosphorylation (STY):0.00	PEAKS DB
HLAAVAS(+79.97)ALWR	16.83	1273.63	11	-1.2	425.551	19.66	18500						1	F1:7172	3P_AZD_2uM_1D_Ppetide_Tyr_IP_CTL1.raw	1	1	0	0	0	0	0	tr|E2QRD4|E2QRD4_HUMAN	Phosphorylation (STY)	S7:Phosphorylation (STY):1000.00	PEAKS DB
KGGHRNSLLGPAHWIVFY(+79.97)NHSGQPEVNHVPLEGPM(+15.99)LEAPGRS(+79.97)LIGL	16.82	5156.5	46	4.4	737.653	42.13				122000			4	F4:16215	3P_AZD_2uM_1D_Ppetide_Tyr_IP_AZD1.raw	1	0	0	0	1	0	0	sp|Q9NY15|STAB1_HUMAN	Phosphorylation (STY); Oxidation (M)	Y18:Phosphorylation (STY):0.00;M35:Oxidation (M):1000.00;S42:Phosphorylation (STY):4.63	PEAKS DB
AAVPSGASTGIY(+79.97)EALELRDNDKTR	16.69	2613.24	24	1.1	872.089	42.46				127000			4	F4:16407	3P_AZD_2uM_1D_Ppetide_Tyr_IP_AZD1.raw	1	0	0	0	1	0	0	sp|P06733|ENOA_HUMAN	Phosphorylation (STY)	Y12:Phosphorylation (STY):0.00	PEAKS DB
LIKDVT(+79.97)EMMAQVEVKLSDTTSQSNST(+79.97)AK	16.67	3213.46	28	7	804.378	9.56						540000	6	F6:2194	3P_AZD_2uM_1D_Ppetide_Tyr_IP_AZD3.raw	1	0	0	0	0	0	1	sp|P07942|LAMB1_HUMAN	Phosphorylation (STY)	T6:Phosphorylation (STY):16.94;T26:Phosphorylation (STY):0.00	PEAKS DB
Q(+.98)T(+79.97)REHALLAYTLGVK	16.66	1779.89	15	-3.3	594.303	35.51	42500						1	F1:14062	3P_AZD_2uM_1D_Ppetide_Tyr_IP_CTL1.raw	1	1	0	0	0	0	0	sp|P68104|EF1A1_HUMAN	Deamidation (NQ); Phosphorylation (STY)	Q1:Deamidation (NQ):1000.00;T2:Phosphorylation (STY):64.00	PEAKS DB
EN(+.98)GEFY(+79.97)ELAKLLPLPSAITS(+79.97)QLDK	16.6	2836.32	24	9.3	946.457	42.58						16800	6	F6:15651	3P_AZD_2uM_1D_Ppetide_Tyr_IP_AZD3.raw	1	0	0	0	0	0	1	sp|Q14190|SIM2_HUMAN	Deamidation (NQ); Phosphorylation (STY)	N2:Deamidation (NQ):13.93;Y6:Phosphorylation (STY):7.40;S20:Phosphorylation (STY):0.00	PEAKS DB
KVEEEQEADEEDVS(+79.97)EEEAESK	16.57	2516.98	21	0.7	840.001	16.01	42900						1	F1:5424	3P_AZD_2uM_1D_Ppetide_Tyr_IP_CTL1.raw	1	1	0	0	0	0	0	sp|Q9H3N1|TMX1_HUMAN	Phosphorylation (STY)	S14:Phosphorylation (STY):0.00	PEAKS DB
DLKPENILLDEIGHIKLT(+79.97)DFGLSKESVDQEK	16.56	3602.81	31	-1.8	515.694	32.63					56000		5	F5:11625	3P_AZD_2uM_1D_Ppetide_Tyr_IP_AZD2.raw	1	0	0	0	0	1	0	sp|Q9UK32|KS6A6_HUMAN	Phosphorylation (STY)	T18:Phosphorylation (STY):30.64	PEAKS DB
KIEVIKPGDLGVDLTS(+79.97)KLSVISVEDPPQRTAGVK	16.54	3667.98	34	-2.7	734.601	31.71						192000	6	F6:11141	3P_AZD_2uM_1D_Ppetide_Tyr_IP_AZD3.raw	1	0	0	0	0	0	1	sp|P38117|ETFB_HUMAN	Phosphorylation (STY)	S16:Phosphorylation (STY):0.00	PEAKS DB
AVRAFLERGHTELDTAFM(+15.99)YS(+79.97)DGQS(+79.97)ETILGGLGLGLGGGDC(+57.02)RVK	16.52	4729.17	43	6.1	789.207	54				343000			4	F4:21085	3P_AZD_2uM_1D_Ppetide_Tyr_IP_AZD1.raw	1	0	0	0	1	0	0	tr|H3BLU7|H3BLU7_HUMAN:sp|O43488|ARK72_HUMAN	Oxidation (M); Phosphorylation (STY); Carbamidomethylation	M18:Oxidation (M):1000.00;S20:Phosphorylation (STY):0.00;S24:Phosphorylation (STY):0.00;C40:Carbamidomethylation:1000.00	PEAKS DB
FKVS(+79.97)SC(+57.02)REC(+57.02)IESGPGC(+57.02)T(+79.97)WC(+57.02)QK	16.51	2735.04	21	-9.7	548.01	49.17				494000			4	F4:19309	3P_AZD_2uM_1D_Ppetide_Tyr_IP_AZD1.raw	1	0	0	0	1	0	0	sp|P05107|ITB2_HUMAN	Phosphorylation (STY); Carbamidomethylation	S4:Phosphorylation (STY):0.00;C6:Carbamidomethylation:1000.00;C9:Carbamidomethylation:1000.00;C16:Carbamidomethylation:1000.00;T17:Phosphorylation (STY):0.00;C19:Carbamidomethylation:1000.00	PEAKS DB
KGTSRMGS(+79.97)LVYPITQ(+.98)VHSASLESYNSGPLSEGTILDLSTTSSM(+15.99)K	16.44	4726.24	44	8.9	788.721	34.29					77500		5	F5:12286	3P_AZD_2uM_1D_Ppetide_Tyr_IP_AZD2.raw	1	0	0	0	0	1	0	sp|Q01954|BNC1_HUMAN	Phosphorylation (STY); Deamidation (NQ); Oxidation (M)	S8:Phosphorylation (STY):0.00;Q15:Deamidation (NQ):0.00;M43:Oxidation (M):0.79	PEAKS DB
LLLNNGAKM(+15.99)PILGLGT(+79.97)WKS(+79.97)PPGQVTEAVK	16.42	3207.62	29	1	642.531	35.76					22000		5	F5:12909	3P_AZD_2uM_1D_Ppetide_Tyr_IP_AZD2.raw	1	0	0	0	0	1	0	sp|P15121|ALDR_HUMAN	Oxidation (M); Phosphorylation (STY)	M9:Oxidation (M):1000.00;T16:Phosphorylation (STY):5.16;S19:Phosphorylation (STY):6.67	PEAKS DB
KLQC(+57.02)VDLHVIS(+79.97)N(+.98)DVC(+57.02)AQ(+.98)VHPQKVTK	16.38	2997.45	25	4.5	500.584	22.79					23400		5	F5:7875	3P_AZD_2uM_1D_Ppetide_Tyr_IP_AZD2.raw	1	0	0	0	0	1	0	tr|M0R294|M0R294_HUMAN	Carbamidomethylation; Phosphorylation (STY); Deamidation (NQ)	C4:Carbamidomethylation:1000.00;S11:Phosphorylation (STY):1.33;N12:Deamidation (NQ):2.20;C15:Carbamidomethylation:1000.00;Q17:Deamidation (NQ):4.73	PEAKS DB
KC(+57.02)LISGWGYLKEDFLVKPEVLQKAT(+79.97)VELLDQALC(+57.02)ASLYG	16.31	4534.29	39	5	756.727	41.3				4060			4	F4:15911	3P_AZD_2uM_1D_Ppetide_Tyr_IP_AZD1.raw	1	0	0	0	1	0	0	tr|A0A0C4DGY1|A0A0C4DGY1_HUMAN	Carbamidomethylation; Phosphorylation (STY)	C2:Carbamidomethylation:1000.00;T25:Phosphorylation (STY):0.00;C34:Carbamidomethylation:1000.00	PEAKS DB
LTT(+79.97)EFVDVMGGLDGDMFN(+.98)YYKMLMLQ(+.98)GLIAARKHMDK	16.29	4333	37	-5.7	620.004	56.35				29700			4	F4:22149	3P_AZD_2uM_1D_Ppetide_Tyr_IP_AZD1.raw	1	0	0	0	1	0	0	tr|A0A0B4J1S8|A0A0B4J1S8_HUMAN	Phosphorylation (STY); Deamidation (NQ)	T3:Phosphorylation (STY):0.00;N18:Deamidation (NQ):1000.00;Q26:Deamidation (NQ):1000.00	PEAKS DB
ESTGAQVQVAGDMLPNSTERAITIAGIPQSIIEC(+57.02)VKQIC(+57.02)VVMLETLSQSPPKGVTIPY(+79.97)RPKPS(+79.97)S(+79.97)	16.27	7116.45	64	4.6	1187.09	54.55				0			4	F4:21370	3P_AZD_2uM_1D_Ppetide_Tyr_IP_AZD1.raw	0	0	0	0	0	0	0	sp|Q15366|PCBP2_HUMAN	Carbamidomethylation; Phosphorylation (STY)	C34:Carbamidomethylation:1000.00;C39:Carbamidomethylation:1000.00;Y58:Phosphorylation (STY):0.00;S63:Phosphorylation (STY):0.00;S64:Phosphorylation (STY):0.00	PEAKS DB
KTS(+79.97)ETLSQAGQK	16.27	1356.63	12	-5.5	453.214	6.87				5090			4	F4:1425	3P_AZD_2uM_1D_Ppetide_Tyr_IP_AZD1.raw	1	0	0	0	1	0	0	tr|H0YC42|H0YC42_HUMAN:sp|P55327|TPD52_HUMAN	Phosphorylation (STY)	S3:Phosphorylation (STY):0.00	PEAKS DB
DDQTEQ(+.98)EPNMLLES(+79.97)EDELLVDEEEAAALLESGSSVGDETDLANLGDVAS(+79.97)DGKKEPSDKAVK	16.19	6634.91	61	-9.3	948.843	27.62						328000	6	F6:9494	3P_AZD_2uM_1D_Ppetide_Tyr_IP_AZD3.raw	1	0	0	0	0	0	1	tr|A0A0R4J2E8|A0A0R4J2E8_HUMAN:sp|P43243|MATR3_HUMAN:tr|A8MXP9|A8MXP9_HUMAN	Deamidation (NQ); Phosphorylation (STY)	Q6:Deamidation (NQ):0.00;S14:Phosphorylation (STY):0.00;S49:Phosphorylation (STY):0.00	PEAKS DB
KASFQ(+.98)KLNGISKGADS(+79.97)ELSTVPS(+79.97)VTK	16.12	2852.36	26	6.7	714.102	39.21						60300	6	F6:14227	3P_AZD_2uM_1D_Ppetide_Tyr_IP_AZD3.raw	1	0	0	0	0	0	1	sp|P46087|NOP2_HUMAN	Deamidation (NQ); Phosphorylation (STY)	Q5:Deamidation (NQ):0.00;S16:Phosphorylation (STY):0.00;S23:Phosphorylation (STY):0.00	PEAKS DB
VPVDPATY(+79.97)GQ(+.98)FYGGDS(+79.97)	16.06	1832.66	16	0.1	917.337	49.88				12600			4	F4:19617	3P_AZD_2uM_1D_Ppetide_Tyr_IP_AZD1.raw	1	0	0	0	1	0	0	tr|A0A0A0MS51|A0A0A0MS51_HUMAN:tr|A0A0A0MT01|A0A0A0MT01_HUMAN:sp|P06396|GELS_HUMAN	Phosphorylation (STY); Deamidation (NQ)	Y8:Phosphorylation (STY):0.00;Q10:Deamidation (NQ):1000.00;S16:Phosphorylation (STY):0.00	PEAKS DB
LS(+79.97)AEYEKVELPSEEQ(+.98)VSGSQGPSEEKPAPLAT(+79.97)EVFDEKIEVHQEEVVAEVHVSTVEER	16.06	6593.05	58	9.8	1099.86	48.92					245000		5	F5:18386	3P_AZD_2uM_1D_Ppetide_Tyr_IP_AZD2.raw	1	0	0	0	0	1	0	sp|Q02952|AKA12_HUMAN	Phosphorylation (STY); Deamidation (NQ)	S2:Phosphorylation (STY):0.00;Q15:Deamidation (NQ):0.00;T32:Phosphorylation (STY):0.00	PEAKS DB
KADLIN(+.98)NLGT(+79.97)IAKSGTKAFMEALQAGADISMIGQFGVGFYSAY(+79.97)LVAEK	16.05	5169.49	48	4.7	862.593	37.33					0		5	F5:13582	3P_AZD_2uM_1D_Ppetide_Tyr_IP_AZD2.raw	0	0	0	0	0	0	0	sp|P08238|HS90B_HUMAN:sp|P07900|HS90A_HUMAN	Deamidation (NQ); Phosphorylation (STY)	N6:Deamidation (NQ):17.01;T10:Phosphorylation (STY):0.00;Y43:Phosphorylation (STY):0.00	PEAKS DB
KN(+.98)FYFLEMNTRLQVEVDGS(+79.97)KLNVTSTWNLASPLLSVSVDGTQ(+.98)R	16.05	4938.41	43	-1.9	824.075	30.54						0	6	F6:10659	3P_AZD_2uM_1D_Ppetide_Tyr_IP_AZD3.raw	0	0	0	0	0	0	0	tr|A0A1B0GWI4|A0A1B0GWI4_HUMAN	Deamidation (NQ); Phosphorylation (STY)	N2:Deamidation (NQ):8.82;S19:Phosphorylation (STY):0.00;Q42:Deamidation (NQ):0.62	PEAKS DB
KLLEGEESRISLPLPN(+.98)FSSLNLRETNLDS(+79.97)LPLVDTHSK	16.03	4342.21	38	9.7	724.716	36.12						11300	6	F6:12890	3P_AZD_2uM_1D_Ppetide_Tyr_IP_AZD3.raw	1	0	0	0	0	0	1	sp|P08670|VIME_HUMAN	Deamidation (NQ); Phosphorylation (STY)	N16:Deamidation (NQ):0.00;S29:Phosphorylation (STY):0.00	PEAKS DB
KGLIAAIC(+57.02)AGPT(+79.97)ALLAHEIGFGS(+79.97)KVTTHPLAK	15.95	3401.73	32	-5.8	681.35	33.48						34900	6	F6:11869	3P_AZD_2uM_1D_Ppetide_Tyr_IP_AZD3.raw	1	0	0	0	0	0	1	tr|K7ELW0|K7ELW0_HUMAN:sp|Q99497|PARK7_HUMAN	Carbamidomethylation; Phosphorylation (STY)	C8:Carbamidomethylation:1000.00;T12:Phosphorylation (STY):3.64;S23:Phosphorylation (STY):0.00	PEAKS DB
KAALSASEGEEVPQ(+.98)DKAPSHVPFLLIGGGT(+79.97)AAFAAARSIR	15.93	4100.07	40	-4.6	821.018	37.28						98800	6	F6:13401	3P_AZD_2uM_1D_Ppetide_Tyr_IP_AZD3.raw	1	0	0	0	0	0	1	sp|O95831|AIFM1_HUMAN	Deamidation (NQ); Phosphorylation (STY)	Q14:Deamidation (NQ):1000.00;T30:Phosphorylation (STY):0.00	PEAKS DB
C(+57.02)GQT(+79.97)LPS(+79.97)LRPEAAAQLLRS(+79.97)APKVC(+57.02)VTVLPPDESGRPR	15.87	4266.02	37	-6.2	712.007	30.26					37700		5	F5:10768	3P_AZD_2uM_1D_Ppetide_Tyr_IP_AZD2.raw	1	0	0	0	0	1	0	tr|F6RY50|F6RY50_HUMAN:sp|Q96FS4|SIPA1_HUMAN	Carbamidomethylation; Phosphorylation (STY)	C1:Carbamidomethylation:1000.00;T4:Phosphorylation (STY):0.00;S7:Phosphorylation (STY):0.00;S19:Phosphorylation (STY):0.00;C24:Carbamidomethylation:1000.00	PEAKS DB
AC(+57.02)TENVKSGKVLLSLS(+79.97)DEDLQLGLGVC(+57.02)SS(+79.97)LHRR	15.84	3800.8	33	8.4	761.173	18.52						527000	6	F6:5924	3P_AZD_2uM_1D_Ppetide_Tyr_IP_AZD3.raw	1	0	0	0	0	0	1	sp|Q674X7|KAZRN_HUMAN	Carbamidomethylation; Phosphorylation (STY)	C2:Carbamidomethylation:1000.00;S16:Phosphorylation (STY):0.00;C27:Carbamidomethylation:1000.00;S29:Phosphorylation (STY):1.00	PEAKS DB
LSGIEERY(+79.97)K	15.83	1173.54	9	-4.2	587.776	19.04		6410					2	F2:7039	3P_AZD_2uM_1D_Ppetide_Tyr_IP_CTL2.raw	1	0	1	0	0	0	0	sp|Q01082|SPTB2_HUMAN:tr|A0A087WUZ3|A0A087WUZ3_HUMAN	Phosphorylation (STY)	Y8:Phosphorylation (STY):19.20	PEAKS DB
GHS(+79.97)ARQHVVADTEL	15.8	1598.72	14	1	533.915	16.17				255000			4	F4:5232	3P_AZD_2uM_1D_Ppetide_Tyr_IP_AZD1.raw	1	0	0	0	1	0	0	sp|P28906|CD34_HUMAN	Phosphorylation (STY)	S3:Phosphorylation (STY):34.08	PEAKS DB
AFEDEMSGRS(+79.97)GHFEQAIK	15.79	2117.89	18	2.9	530.481	24.59						68500	6	F6:8252	3P_AZD_2uM_1D_Ppetide_Tyr_IP_AZD3.raw	1	0	0	0	0	0	1	sp|Q01082|SPTB2_HUMAN:tr|A0A087WUZ3|A0A087WUZ3_HUMAN	Phosphorylation (STY)	S10:Phosphorylation (STY):0.00	PEAKS DB
KTIQMGS(+79.97)FRINPDGS(+79.97)QS(+79.97)VVEVPYA	15.71	2862.21	24	5.2	955.082	40.47						64500	6	F6:14770	3P_AZD_2uM_1D_Ppetide_Tyr_IP_AZD3.raw	1	0	0	0	0	0	1	tr|F8W031|F8W031_HUMAN	Phosphorylation (STY)	S7:Phosphorylation (STY):0.00;S15:Phosphorylation (STY):0.00;S17:Phosphorylation (STY):0.00	PEAKS DB
T(+79.97)MPTTFNREGNK	15.7	1474.63	12	4	738.324	38.31			1960000				3	F3:15348	3P_AZD_2uM_1D_Ppetide_Tyr_IP_CTL3.raw	1	0	0	1	0	0	0	tr|U3KQP1|U3KQP1_HUMAN	Phosphorylation (STY)	T1:Phosphorylation (STY):9.42	PEAKS DB
QGKT(+79.97)LAFT(+79.97)S(+79.97)VDLTNKATGK	15.67	2218.97	19	2.5	740.665	25.23		0					2	F2:9959	3P_AZD_2uM_1D_Ppetide_Tyr_IP_CTL2.raw	0	0	0	0	0	0	0	sp|Q9NPJ3|ACO13_HUMAN	Phosphorylation (STY)	T4:Phosphorylation (STY):0.00;T8:Phosphorylation (STY):0.00;S9:Phosphorylation (STY):0.00	PEAKS DB
KFKDPN(+.98)APKRPPS(+79.97)AFFLFC(+57.02)SEYHPK	15.65	3088.47	25	1.5	618.702	16.95				32000			4	F4:5510	3P_AZD_2uM_1D_Ppetide_Tyr_IP_AZD1.raw	1	0	0	0	1	0	0		Deamidation (NQ); Phosphorylation (STY); Carbamidomethylation	N6:Deamidation (NQ):1000.00;S13:Phosphorylation (STY):0.00;C19:Carbamidomethylation:1000.00	PEAKS DB
KKPAGPSVSELIVQAAS(+79.97)S(+79.97)SK	15.56	2143.03	20	1.3	715.352	29.43						140000	6	F6:10192	3P_AZD_2uM_1D_Ppetide_Tyr_IP_AZD3.raw	1	0	0	0	0	0	1		Phosphorylation (STY)	S17:Phosphorylation (STY):11.10;S18:Phosphorylation (STY):0.00	PEAKS DB
KDPN(+.98)APKRPPSGFFLFC(+57.02)S(+79.97)EFRPKIK	15.51	3043.51	25	4	609.712	38.08						80600	6	F6:13705	3P_AZD_2uM_1D_Ppetide_Tyr_IP_AZD3.raw	1	0	0	0	0	0	1	sp|O15347|HMGB3_HUMAN	Deamidation (NQ); Carbamidomethylation; Phosphorylation (STY)	N4:Deamidation (NQ):1000.00;C17:Carbamidomethylation:1000.00;S18:Phosphorylation (STY):0.00	PEAKS DB
S(+79.97)GAPMIK	15.5	782.34	7	-1.8	392.176	9.79	16200						1	F1:2377	3P_AZD_2uM_1D_Ppetide_Tyr_IP_CTL1.raw	1	1	0	0	0	0	0	sp|Q5UIP0|RIF1_HUMAN	Phosphorylation (STY)	S1:Phosphorylation (STY):1000.00	PEAKS DB
AM(+15.99)MANRLSFFFDFRGPSIALDTAC(+57.02)SSSLM(+15.99)ALQNAYQAIHSGQC(+57.02)PAAIVGGINVLLKPNT(+79.97)SVQFL	15.5	7028.4	64	8.9	1005.07	49.43						90100	6	F6:18473	3P_AZD_2uM_1D_Ppetide_Tyr_IP_AZD3.raw	1	0	0	0	0	0	1	sp|P49327|FAS_HUMAN	Oxidation (M); Carbamidomethylation; Phosphorylation (STY)	M2:Oxidation (M):0.00;C24:Carbamidomethylation:1000.00;M29:Oxidation (M):0.03;C43:Carbamidomethylation:1000.00;T59:Phosphorylation (STY):0.00	PEAKS DB
KEDM(+15.99)ELDDC(+57.02)S(+79.97)KFVQYETDLT(+79.97)	15.49	2640.99	20	-3.8	1321.5	54.59						10900	6	F6:20423	3P_AZD_2uM_1D_Ppetide_Tyr_IP_AZD3.raw	1	0	0	0	0	0	1	sp|Q93084|AT2A3_HUMAN	Oxidation (M); Carbamidomethylation; Phosphorylation (STY)	M4:Oxidation (M):1000.00;C9:Carbamidomethylation:1000.00;S10:Phosphorylation (STY):1.86;T20:Phosphorylation (STY):0.00	PEAKS DB
KVNNS(+79.97)SLIGLGYTQ(+.98)TLKPGIKLTLSALLDGKNVNAGGHK	15.49	4100.2	39	7	821.054	42.2						0	6	F6:15492	3P_AZD_2uM_1D_Ppetide_Tyr_IP_AZD3.raw	0	0	0	0	0	0	0	sp|P21796|VDAC1_HUMAN	Phosphorylation (STY); Deamidation (NQ)	S5:Phosphorylation (STY):0.00;Q14:Deamidation (NQ):0.00	PEAKS DB
VTAN(+.98)S(+79.97)KLVIITAGAR	15.45	1593.85	15	-0.4	797.932	36.85					0		5	F5:13371	3P_AZD_2uM_1D_Ppetide_Tyr_IP_AZD2.raw	0	0	0	0	0	0	0	sp|P00338|LDHA_HUMAN	Deamidation (NQ); Phosphorylation (STY)	N4:Deamidation (NQ):1000.00;S5:Phosphorylation (STY):4.52	PEAKS DB
KPITAS(+79.97)KVEFAISRVQMNFLHLLSSEVTQHITIHC(+57.02)LNMTVWQEGT(+79.97)GQTPAK	15.37	5935.9	51	4.8	848.997	46.27						0	6	F6:17172	3P_AZD_2uM_1D_Ppetide_Tyr_IP_AZD3.raw	0	0	0	0	0	0	0	sp|Q8IZC6|CORA1_HUMAN	Phosphorylation (STY); Carbamidomethylation	S6:Phosphorylation (STY):0.00;C35:Carbamidomethylation:1000.00;T45:Phosphorylation (STY):0.00	PEAKS DB
LSLEGDHSTPPS(+79.97)AYGSVK	15.37	1923.86	18	0.7	642.295	25.43						36700	6	F6:8662	3P_AZD_2uM_1D_Ppetide_Tyr_IP_AZD3.raw	1	0	0	0	0	0	1	sp|P07355|ANXA2_HUMAN	Phosphorylation (STY)	S12:Phosphorylation (STY):0.00	PEAKS DB
KDET(+79.97)HVKMES(+79.97)EGGAEDS(+79.97)AEEGDPLDDDDNEDQGDNQLHLIKNNEK	15.31	5249.05	45	-7.4	875.842	23.77				941000			4	F4:8454	3P_AZD_2uM_1D_Ppetide_Tyr_IP_AZD1.raw	1	0	0	0	1	0	0		Phosphorylation (STY)	T4:Phosphorylation (STY):1000.00;S10:Phosphorylation (STY):1000.00;S17:Phosphorylation (STY):1000.00	PEAKS DB
QGLEIESLKT(+79.97)VSHEAEVHAESLQQK	15.29	2869.39	25	-6.9	718.349	25.68		0					2	F2:10177	3P_AZD_2uM_1D_Ppetide_Tyr_IP_CTL2.raw	0	0	0	0	0	0	0	sp|Q14789|GOGB1_HUMAN	Phosphorylation (STY)	T10:Phosphorylation (STY):0.00	PEAKS DB
AC(+57.02)LISMGYDLGEAEFARIMT(+79.97)LVDPNGQGTVTFQSFIDFMT(+79.97)RET(+79.97)ADTDTAEQVIASFRILASD	15.29	7075.14	62	3.9	1180.2	34.71					61900		5	F5:12450	3P_AZD_2uM_1D_Ppetide_Tyr_IP_AZD2.raw	1	0	0	0	0	1	0		Carbamidomethylation; Phosphorylation (STY)	C2:Carbamidomethylation:1000.00;T20:Phosphorylation (STY):0.00;T40:Phosphorylation (STY):0.00;T43:Phosphorylation (STY):0.00	PEAKS DB
LDVTTSIGRRQHLRVS(+79.97)TAFVYTK	15.29	2727.42	23	4.1	546.494	21.1					160000		5	F5:7125	3P_AZD_2uM_1D_Ppetide_Tyr_IP_AZD2.raw	1	0	0	0	0	1	0	sp|P04114|APOB_HUMAN	Phosphorylation (STY)	S16:Phosphorylation (STY):0.00	PEAKS DB
TLSPTGT(+79.97)AQPSWGVDPKEGPQELQEKKIQVLEEK	15.25	3826.9	34	-1.5	766.387	48.27				66900			4	F4:18905	3P_AZD_2uM_1D_Ppetide_Tyr_IP_AZD1.raw	1	0	0	0	1	0	0	sp|Q9BXX0|EMIL2_HUMAN	Phosphorylation (STY)	T7:Phosphorylation (STY):0.00	PEAKS DB
KQIFILLFQRLQNSKT(+79.97)T(+79.97)K	15.23	2365.23	18	2.8	592.317	34.05		32800					2	F2:14084	3P_AZD_2uM_1D_Ppetide_Tyr_IP_CTL2.raw	1	0	1	0	0	0	0	sp|P55060|XPO2_HUMAN	Phosphorylation (STY)	T16:Phosphorylation (STY):0.00;T17:Phosphorylation (STY):0.00	PEAKS DB
M(+42.01)AALGPS(+79.97)SQNVTEYVVRVPKNTTK	15.21	2711.34	24	3.1	678.843	26.67					239000		5	F5:9258	3P_AZD_2uM_1D_Ppetide_Tyr_IP_AZD2.raw	1	0	0	0	0	1	0	sp|P35269|T2FA_HUMAN	Acetylation (Protein N-term); Phosphorylation (STY)	M1:Acetylation (Protein N-term):1000.00;S7:Phosphorylation (STY):0.00	PEAKS DB
KRGIRVGYTPDVLTDTTAELAVSLLLT(+79.97)T(+79.97)C(+57.02)R	15.19	3478.73	30	8.5	696.759	33.3				82300			4	F4:12395	3P_AZD_2uM_1D_Ppetide_Tyr_IP_AZD1.raw	1	0	0	0	1	0	0	sp|Q9UBQ7|GRHPR_HUMAN	Phosphorylation (STY); Carbamidomethylation	T27:Phosphorylation (STY):4.98;T28:Phosphorylation (STY):4.80;C29:Carbamidomethylation:1000.00	PEAKS DB
YHGHSM(+15.99)SDPGVS(+79.97)YR	15.18	1687.64	14	-0.3	563.555	9.74			16900				3	F3:2415	3P_AZD_2uM_1D_Ppetide_Tyr_IP_CTL3.raw	1	0	0	1	0	0	0	sp|P08559|ODPA_HUMAN:sp|P29803|ODPAT_HUMAN	Oxidation (M); Phosphorylation (STY)	M6:Oxidation (M):1000.00;S12:Phosphorylation (STY):0.00	PEAKS DB
Y(+79.97)IEDEDYY(+79.97)KASVTR	15.18	1910.74	14	2	956.378	20.47			56500				3	F3:7644	3P_AZD_2uM_1D_Ppetide_Tyr_IP_CTL3.raw	1	0	0	1	0	0	0	sp|Q14289|FAK2_HUMAN	Phosphorylation (STY)	Y1:Phosphorylation (STY):0.00;Y8:Phosphorylation (STY):17.01	PEAKS DB
WFRNGQEEKTGVVSTGLIHN(+.98)GDWTFQTLVMLETVPRSGEVYTC(+57.02)Q(+.98)VEHPSVTSPLT(+79.97)VEWSA	15.17	6871.23	60	0.5	982.611	48.11				0			4	F4:18799	3P_AZD_2uM_1D_Ppetide_Tyr_IP_AZD1.raw	0	0	0	0	0	0	0		Deamidation (NQ); Carbamidomethylation; Phosphorylation (STY)	N20:Deamidation (NQ):0.00;C43:Carbamidomethylation:1000.00;Q44:Deamidation (NQ):0.00;T55:Phosphorylation (STY):0.00	PEAKS DB
AC(+57.02)DQLS(+79.97)LGVAAIFGPS(+79.97)HSSSANAVQSIC(+57.02)NALGVPHIQTRWKHQVSDNK	15.16	5315.48	48	8.6	886.928	31.43					88300		5	F5:11202	3P_AZD_2uM_1D_Ppetide_Tyr_IP_AZD2.raw	1	0	0	0	0	1	0	tr|A0A0A0MR30|A0A0A0MR30_HUMAN	Carbamidomethylation; Phosphorylation (STY)	C2:Carbamidomethylation:1000.00;S6:Phosphorylation (STY):0.00;S16:Phosphorylation (STY):0.00;C28:Carbamidomethylation:1000.00	PEAKS DB
DKIPEEALS(+79.97)PSYLTVC(+57.02)LKLHEAIC(+57.02)SS(+79.97)T(+79.97)KLLK	15.16	3782.77	31	-8.6	631.464	44.84						0	6	F6:16620	3P_AZD_2uM_1D_Ppetide_Tyr_IP_AZD3.raw	0	0	0	0	0	0	0	tr|A0A0A0MTR7|A0A0A0MTR7_HUMAN	Phosphorylation (STY); Carbamidomethylation	S9:Phosphorylation (STY):0.00;C16:Carbamidomethylation:1000.00;C24:Carbamidomethylation:1000.00;S26:Phosphorylation (STY):0.00;T27:Phosphorylation (STY):0.00	PEAKS DB
SGLT(+79.97)KALASR	15.15	1082.55	10	-0.4	361.857	6.17			14800				3	F3:1030	3P_AZD_2uM_1D_Ppetide_Tyr_IP_CTL3.raw	1	0	0	1	0	0	0	sp|Q9BS92|NPS3B_HUMAN	Phosphorylation (STY)	T4:Phosphorylation (STY):4.75	PEAKS DB
KINYKGERQ(+.98)TITDDVEVNS(+79.97)YLSLPADLTK	15.14	3390.66	29	3.7	679.142	38.77						115000	6	F6:14106	3P_AZD_2uM_1D_Ppetide_Tyr_IP_AZD3.raw	1	0	0	0	0	0	1	tr|B7Z7Y1|B7Z7Y1_HUMAN	Deamidation (NQ); Phosphorylation (STY)	Q9:Deamidation (NQ):0.00;S19:Phosphorylation (STY):0.00	PEAKS DB
NGHS(+79.97)ARQ(+.98)HVVADTEL	15.12	1713.75	15	1.1	572.257	21.29					293000		5	F5:7239	3P_AZD_2uM_1D_Ppetide_Tyr_IP_AZD2.raw	1	0	0	0	0	1	0	sp|P28906|CD34_HUMAN	Phosphorylation (STY); Deamidation (NQ)	S4:Phosphorylation (STY):18.04;Q7:Deamidation (NQ):0.00	PEAKS DB
AGQ(+.98)VVT(+79.97)IWAAGAGATHS(+79.97)PPTDLVWKAQNTWGC(+57.02)GNSLR	15.11	4037.83	37	-3.8	808.57	18.06					100000		5	F5:6081	3P_AZD_2uM_1D_Ppetide_Tyr_IP_AZD2.raw	1	0	0	0	0	1	0	sp|P02545|LMNA_HUMAN	Deamidation (NQ); Phosphorylation (STY); Carbamidomethylation	Q3:Deamidation (NQ):11.47;T6:Phosphorylation (STY):13.05;S17:Phosphorylation (STY):0.00;C32:Carbamidomethylation:1000.00	PEAKS DB
KYS(+79.97)LEPVAVELKSLLGK	15.1	1953.06	17	5.9	391.621	35.04				8230			4	F4:13161	3P_AZD_2uM_1D_Ppetide_Tyr_IP_AZD1.raw	1	0	0	0	1	0	0	sp|P00558|PGK1_HUMAN	Phosphorylation (STY)	S3:Phosphorylation (STY):0.00	PEAKS DB
TGTLTQ(+.98)NIMT(+79.97)FK	15.03	1434.65	12	-2.6	718.329	34.25		28900					2	F2:14164	3P_AZD_2uM_1D_Ppetide_Tyr_IP_CTL2.raw	1	0	1	0	0	0	0	sp|Q8TF62|AT8B4_HUMAN	Deamidation (NQ); Phosphorylation (STY)	Q6:Deamidation (NQ):12.28;T10:Phosphorylation (STY):10.16	PEAKS DB
KNGPTDHS(+79.97)NS(+79.97)TTWHRLHPTDGS(+79.97)SGQNSKVGTGMSK	15.03	3945.63	35	-4.9	494.209	6.04				49700			4	F4:1074	3P_AZD_2uM_1D_Ppetide_Tyr_IP_AZD1.raw	1	0	0	0	1	0	0	sp|Q86YV5|PRAG1_HUMAN	Phosphorylation (STY)	S8:Phosphorylation (STY):0.00;S10:Phosphorylation (STY):0.00;S22:Phosphorylation (STY):0.00	PEAKS DB
FTS(+79.97)TEPQ(+.98)YQ(+.98)PGENL	15.03	1691.66	14	1.6	846.839	35.13				142000			4	F4:13238	3P_AZD_2uM_1D_Ppetide_Tyr_IP_AZD1.raw	1	0	0	0	1	0	0	sp|P12931|SRC_HUMAN	Phosphorylation (STY); Deamidation (NQ)	S3:Phosphorylation (STY):0.00;Q7:Deamidation (NQ):7.99;Q9:Deamidation (NQ):16.51	PEAKS DB
FKVS(+79.97)SC(+57.02)REC(+57.02)IES(+79.97)GPGC(+57.02)TWC(+57.02)Q(+.98)K	15.03	2736.02	21	2.1	548.213	49.43						344000	6	F6:18525	3P_AZD_2uM_1D_Ppetide_Tyr_IP_AZD3.raw	1	0	0	0	0	0	1	sp|P05107|ITB2_HUMAN	Phosphorylation (STY); Carbamidomethylation; Deamidation (NQ)	S4:Phosphorylation (STY):0.00;C6:Carbamidomethylation:1000.00;C9:Carbamidomethylation:1000.00;S12:Phosphorylation (STY):0.00;C16:Carbamidomethylation:1000.00;C19:Carbamidomethylation:1000.00;Q20:Deamidation (NQ):1000.00	PEAKS DB
ISAGTAAGFGAPSQWMHHRT(+79.97)PSMHNQSHVPFAPAELKVQAKMESLVVSWQ(+.98)PPPHPT	15.02	6145.93	56	6.4	879.003	29.09					300000		5	F5:10205	3P_AZD_2uM_1D_Ppetide_Tyr_IP_AZD2.raw	1	0	0	0	0	1	0	sp|Q8TDY8|IGDC4_HUMAN	Phosphorylation (STY); Deamidation (NQ)	T20:Phosphorylation (STY):0.00;Q50:Deamidation (NQ):7.90	PEAKS DB
LEVLEEWQS(+79.97)HIEGWEGS(+79.97)NITDT(+79.97)C(+57.02)TEMLMC(+57.02)GVLLK	15.01	4246.75	34	4	607.688	46.96					46300		5	F5:17612	3P_AZD_2uM_1D_Ppetide_Tyr_IP_AZD2.raw	1	0	0	0	0	1	0	sp|Q70Z35|PREX2_HUMAN	Phosphorylation (STY); Carbamidomethylation	S9:Phosphorylation (STY):0.00;S17:Phosphorylation (STY):0.00;T22:Phosphorylation (STY):0.00;C23:Carbamidomethylation:1000.00;C29:Carbamidomethylation:1000.00	PEAKS DB
TS(+79.97)S(+79.97)DPTC(+57.02)VEK	15.01	1282.42	10	-6.2	642.213	14.82						36000	6	F6:4631	3P_AZD_2uM_1D_Ppetide_Tyr_IP_AZD3.raw	1	0	0	0	0	0	1	sp|O14980|XPO1_HUMAN	Phosphorylation (STY); Carbamidomethylation	S2:Phosphorylation (STY):0.00;S3:Phosphorylation (STY):0.00;C7:Carbamidomethylation:1000.00	PEAKS DB
EKTPSPKEEDEEPES(+79.97)PPEKK	15	2389.06	20	2.4	598.273	10.88					56400		5	F5:2784	3P_AZD_2uM_1D_Ppetide_Tyr_IP_AZD2.raw	1	0	0	0	0	1	0	sp|Q9H1E3|NUCKS_HUMAN	Phosphorylation (STY)	S15:Phosphorylation (STY):2.16	PEAKS DB

## Sheet: pY Peptides LFQ
Accession	Gene Name	Peptides	Site	CTL1	CTL2	CTL3	Average CTL	Average CTL/Normalization	AZD1	AZD2	AZD3	Average AZD	Average AZD/Normalization		Osimertinib/CTL	Osimertinib/CTL(Normalization)
O00401	WASL	VIY(+79.97)DFIEK	VIY(+79.97)DFIEK	130000	141000		135500	135500				0	0		0	0
O00459	PIK3R2	YDQLY(+79.97)EEYTR	YDQLY(+79.97)EEYTR		49900	47200	48550	48550				0	0		0	0
O60496	DOK2	GQEGEY(+79.97)AVPFDAVAR	GQEGEY(+79.97)AVPFDAVAR	315000	338000	301000	318000	318000	86700	103000	96800	95500	62828.9		0.300314	0.197575
O60667	FCMR	SQNNIY(+79.97)SAC(+57.02)PR	SQNNIY(+79.97)SAC(+57.02)PR				0	0	79100	85600	73000	79233.3	52127.2		#DIV/0!	#DIV/0!
O75995	SASH3	VHTDFTPSPY(+79.97)DHDSLK	VHTDFTPSPY(+79.97)DHDSLK	150000	202000	186000	179333	179333		24400		24400	16052.6		0.136059	0.0895128
P00338	LDHA	QVVESAY(+79.97)EVIK	QVVESAY(+79.97)EVIK	60300	71800	63500	65200	65200				0	0		0	0
P00367	GLUD1	IVHSGLAY(+79.97)TMER	IVHSGLAY(+79.97)TMER			62300	62300	62300				0	0		0	0
P04075	ALDOA	Y(+79.97)QY(+79.97)PALTPEQKKELSDIAHRIVAPGK	Y(+79.97)QY(+79.97)PALTPEQKKELSDIAHRIVAPGK				0	0			0	0	0
P05556	ITGB1	WDTGENPIY(+79.97)K	WDTGENPIY(+79.97)K	56700	78900	64100	66566.7	66566.7				0	0		0	0
P06213	INSR	IYETDY(+79.97)YR	IYETDY(+79.97)YR	66900	82200	67200	120883	120883				0	0		0	0
P06241	FYN	FTATEPQY(+79.97)QPGENL	FTATEPQY(+79.97)QPGENL	5070000		7260000	3178750	3178750		652000	780000	716000	471053		0.225246	0.148188
P06241	FYN	LIEDNEY(+79.97)TAR	LIEDNEY(+79.97)TAR	564000	699000	553000	605333	605333	185000	159000	174000	172667	113596		0.285242	0.187659
P06733	ENO1	AAVPSGASTGIY(+79.97)EALELRDNDKTR	AAVPSGASTGIY(+79.97)EALELRDNDKTR				0	0	127000			127000	83552.6		#DIV/0!	#DIV/0!
P07108	DBI	TKPSDEEMLFIY(+79.97)GHYK	TKPSDEEMLFIY(+79.97)GHYK	117000	122000	145000	128000	128000				0	0		0	0
P07195	LDHB	MVVESAY(+79.97)EVIK	MVVESAY(+79.97)EVIK	37200			37200	37200				0	0		0	0
P07355	ANXA2	AY(+79.97)TNFDAER	AY(+79.97)TNFDAER	215000	232000	200000	215667	215667				0	0		0	0
P07355	ANXA2	LSLEGDHSTPPSAY(+79.97)GSVK	LSLEGDHSTPPSAY(+79.97)GSVK	271000	259000	314000	281333	281333	134000			134000	88157.9		0.476303	0.313357
P07355	ANXA2	SLYY(+79.97)YIQQDTK	SLYY(+79.97)YIQQDTK			78000	78000	78000				0	0		0	0
P07948	LYN	FYTATEGQY(+79.97)QQQP	FYTATEGQY(+79.97)QQQP	6340000			19835000	19835000				7.03667e+06	4.62939e+06		0.35476	0.233395
P07948	LYN	VENC(+57.02)PDELY(+79.97)DIMK	VENC(+57.02)PDELY(+79.97)DIMK	75500	78100	85000	79533.3	79533.3				0	0		0	0
P07948	LYN	IEDNEY(+79.97)TAR	IEDNEY(+79.97)TAR	78200	46000	71400	1.62427e+06	1.62427e+06		18400		570850	375559		0.351451	0.231218
P08238	HSP90AB1	SIY(+79.97)YITGESK	SIY(+79.97)YITGESK	64100	90500	73500	76033.3	76033.3				0	0		0	0
P08238	HSP90AB1	KADLIN(+.98)NLGT(+79.97)IAKSGTKAFMEALQAGADISMIGQFGVGFYSAY(+79.97)LVAEK	KADLIN(+.98)NLGT(+79.97)IAKSGTKAFMEALQAGADISMIGQFGVGFYSAY(+79.97)LVAEK				0	0		0		0	0
P08559	PDHA1	AAASTDY(+79.97)YKR	AAASTDY(+79.97)YKR	35100		30000	32550	32550				0	0		0	0
P08559	PDHA1	AAASTDYY(+79.97)KR	AAASTDYY(+79.97)KR		37800		37800	37800				0	0		0	0
P08670	VIM	SLY(+79.97)ASSPGGVYATR	SLY(+79.97)ASSPGGVYATR		12400		12400	12400				0	0		0	0
P09429	HMGB1	GKMS(+79.97)S(+79.97)Y(+79.97)AFFVQTC(+57.02)R	GKMS(+79.97)S(+79.97)Y(+79.97)AFFVQTC(+57.02)R				0	0	186000			186000	122368		#DIV/0!	#DIV/0!
P0C7N1	OR8U8	M(+15.99)TPGIC(+57.02)IQ(+.98)LVAVPYSYSFLMALFHTILTFRLSY(+79.97)C(+57.02)HSNIVNHFYC(+57.02)DDMPLLRLTC(+57.02)SDTR	M(+15.99)TPGIC(+57.02)IQ(+.98)LVAVPYSYSFLMALFHTILTFRLSY(+79.97)C(+57.02)HSNIVNHFYC(+57.02)DDMPLLRLTC(+57.02)SDTR				0	0		5120000		5120000	3.36842e+06		#DIV/0!	#DIV/0!
P0DP24	CALM2	VFDKDGN(+.98)GY(+79.97)ISAAELR	VFDKDGN(+.98)GY(+79.97)ISAAELR	150000	167000	163000	160000	160000				0	0		0	0
P11274	BCR	GHGQPGADAEKPFY(+79.97)VNVEFHHER	GHGQPGADAEKPFY(+79.97)VNVEFHHER				0	0	165000	144000	142000	126667	83333.3		#DIV/0!	#DIV/0!
P11413	G6PD	VQ(+.98)PNEAVY(+79.97)TK	VQ(+.98)PNEAVY(+79.97)TK		50800		50800	50800				0	0		0	0
P12931	SRC	EDYFTSTEPQY(+79.97)QPGENL	EDYFTSTEPQY(+79.97)QPGENL			151000	649500	649500				364625	239885		0.561393	0.369338
P15144	ANPEP	VPVTLALNNTLFLIEERQY(+79.97)MPWEAALSSLSYFKLMFDRS(+79.97)EVYGPM(+15.99)K	VPVTLALNNTLFLIEERQY(+79.97)MPWEAALSSLSYFKLMFDRS(+79.97)EVYGPM(+15.99)K				0	0	44200			44200	29078.9		#DIV/0!	#DIV/0!
P16284	PECAM1	DTETVY(+79.97)SEVR	DTETVY(+79.97)SEVR	15900	24600		204417	204417				52925	34819.1		0.258907	0.170334
P16333	NCK1	LY(+79.97)DLNM(+15.99)PAYVK	LY(+79.97)DLNM(+15.99)PAYVK	411000	449000	502000	551000	551000				112600	74078.9		0.204356	0.134445
P16333	NCK1	RKPSVPDSASPADDSFVDPGERLYDLNM(+15.99)PAY(+79.97)VK	RKPSVPDSASPADDSFVDPGERLYDLNM(+15.99)PAY(+79.97)VK				0	0		0		0	0
P18433	PTPRA	YIDAFSDY(+79.97)ANFK	YIDAFSDY(+79.97)ANFK			72100	72100	72100				0	0		0	0
P23469	PTPRE	FSDY(+79.97)ANFK	FSDY(+79.97)ANFK	139000		118000	128500	128500				0	0		0	0
P24941	CDK2	IGEGT(+79.97)Y(+79.97)GVVYK	IGEGT(+79.97)Y(+79.97)GVVYK			328000	328000	328000				0	0		0	0
P24941	CDK2	IGEGTY(+79.97)GVVYK	IGEGTY(+79.97)GVVYK	1340000	1590000	1400000	1.44333e+06	1.44333e+06	260000	240000	242000	247333	162719		0.171363	0.112739
P24941	CDK2	IGEGTYGVVY(+79.97)K	IGEGTYGVVY(+79.97)K	49500	63500	39900	50966.7	50966.7				0	0		0	0
P26038	MSN	APDFVFY(+79.97)APR	APDFVFY(+79.97)APR	59300	60200	59000	59500	59500				0	0		0	0
P28482	MAPK1	VADPDHDHTGFLT(+79.97)EY(+79.97)VATR	VADPDHDHTGFLT(+79.97)EY(+79.97)VATR	370000	317000		343500	343500				0	0		0	0
P28482	MAPK1	VADPDHDHTGFLTEY(+79.97)VATR	VADPDHDHTGFLTEY(+79.97)VATR		1540000	1510000	1525000	1525000	286000	250000		268000	176316		0.175738	0.115617
P28906	CD34	LGEDPY(+79.97)YTEN(+.98)GGGQGYSSGPGTSPEAQGK	LGEDPY(+79.97)YTEN(+.98)GGGQGYSSGPGTSPEAQGK	204000	212000	162000	148575	148575				0	0		0	0
P29353	SHC1	LFDDPSY(+79.97)VNVQNLDK	LFDDPSY(+79.97)VNVQNLDK	149000	167000	220000	178667	178667	83400		69000	76200	50131.6		0.426493	0.280587
P40763	STAT3	YC(+57.02)RPESQEHPEADPGSAAPY(+79.97)LK	YC(+57.02)RPESQEHPEADPGSAAPY(+79.97)LK	11200000	11700000	9550000	1.08167e+07	1.08167e+07	1040000	973000	978000	762900	501908		0.07053	0.0464013
P42680	TEC	YVLDDQY(+79.97)TSSSGAK	YVLDDQY(+79.97)TSSSGAK	877000	1260000	855000	997333	997333				0	0		0	0
P42768	WAS	LIY(+79.97)DFIEDQGGLEAVR	LIY(+79.97)DFIEDQGGLEAVR	94400	111000	226000	143800	143800	279000	257000	243000	259667	170833		1.80575	1.18799
P46109	CRKL	HGNRNSNSYGIPEPAHAY(+79.97)AQ(+.98)PQTTTPLPAVSGSPGAAITPLPSTQNGPVFAK	HGNRNSNSYGIPEPAHAY(+79.97)AQ(+.98)PQTTTPLPAVSGSPGAAITPLPSTQNGPVFAK				0	0		21200		21200	13947.4		#DIV/0!	#DIV/0!
P49840	GSK3A	EPNVSY(+79.97)IC(+57.02)SR	EPNVSY(+79.97)IC(+57.02)SR	1090000	1530000	1220000	9940000	9940000	225000	172000	204000	732778	482091		0.0737201	0.0485001
P53396	ACLY	TTDGVY(+79.97)EGVAIGGDR	TTDGVY(+79.97)EGVAIGGDR	136000	170000	135000	147000	147000				0	0		0	0
P53778	MAPK12	QADSEMTGY(+79.97)VVTR	QADSEMTGY(+79.97)VVTR	241000	337000	286000	247750	247750				0	0		0	0
P58546	MTPN	KPLHYAADC(+57.02)GQLEILEFLLLKGADIN(+.98)APDKHHITPLLS(+79.97)AVY(+79.97)EGHVSC(+57.02)VK	KPLHYAADC(+57.02)GQLEILEFLLLKGADIN(+.98)APDKHHITPLLS(+79.97)AVY(+79.97)EGHVSC(+57.02)VK				0	0	394000			394000	259211		#DIV/0!	#DIV/0!
P68104	EEF1A1	HALLAY(+79.97)TLGVK	HALLAY(+79.97)TLGVK		59500	60300	59900	59900				0	0		0	0
P68104	EEF1A1	STTTGHLIY(+79.97)K	STTTGHLIY(+79.97)K	61000			61000	61000				0	0		0	0
P98160	HSPG2	VVGSSGTQEASVLVT(+79.97)IQQRLSGSHSQGVAY(+79.97)PVRIES(+79.97)SSASLAN	VVGSSGTQEASVLVT(+79.97)IQQRLSGSHSQGVAY(+79.97)PVRIES(+79.97)SSASLAN				0	0		49500		49500	32565.8		#DIV/0!	#DIV/0!
Q01082	SPTBN1	LSGIEERY(+79.97)K	LSGIEERY(+79.97)K		6410		6410	6410				0	0		0	0
Q06124	PTPN11	GHEY(+79.97)TNIK	GHEY(+79.97)TNIK		14300		14300	14300				0	0		0	0
Q06124	PTPN11	IQNTGDY(+79.97)YDLYGGEK	IQNTGDY(+79.97)YDLYGGEK	937000	1000000	940000	959000	959000	157000	157000	137000	150333	98903.5		0.156761	0.103132
Q07912	TNK2	ALPQNDDHY(+79.97)VMQEHR	ALPQNDDHY(+79.97)VMQEHR			54500	54500	54500				294000	193421		5.3945	3.54901
Q07912	TNK2	VSSTHY(+79.97)YLLPERPSYLER	VSSTHY(+79.97)YLLPERPSYLER			478000	478000	478000	294000			294000	193421		0.615063	0.404647
Q07912	TNK2	KPTY(+79.97)DPVSEDQDPLSSDFK	KPTY(+79.97)DPVSEDQDPLSSDFK	1140000	1130000	1250000	1015500	1015500				544667	358333		0.536353	0.352864
Q13509	TUBB3	KAFLHWYTGEGM(+15.99)DEMEFT(+79.97)EAESNMNDLVSEY(+79.97)QQYQDATAEEEGEMYEDDEEESEAQGPK	KAFLHWYTGEGM(+15.99)DEMEFT(+79.97)EAESNMNDLVSEY(+79.97)QQYQDATAEEEGEMYEDDEEESEAQGPK				0	0		215000		215000	141447		#DIV/0!	#DIV/0!
Q13523	PRPF4B	VADNDITPY(+79.97)LVSR	VADNDITPY(+79.97)LVSR	218000	275000	253000	436971	436971				770667	507018		1.76365	1.1603
Q14190	SIM2	EN(+.98)GEFY(+79.97)ELAKLLPLPSAITS(+79.97)QLDK	EN(+.98)GEFY(+79.97)ELAKLLPLPSAITS(+79.97)QLDK				0	0			16800	16800	11052.6		#DIV/0!	#DIV/0!
Q14289	PTK2B	Y(+79.97)IEDEDYY(+79.97)KASVTR	Y(+79.97)IEDEDYY(+79.97)KASVTR			56500	56500	56500				0	0		0	0
Q14289	PTK2B	YIEDEDYY(+79.97)K	YIEDEDYY(+79.97)K			28400	28400	28400				0	0		0	0
Q14289	PTK2B	YIEDEDY(+79.97)YK	YIEDEDY(+79.97)YK	246000	248000	228000	240667	240667				0	0		0	0
Q15366	PCBP2	ESTGAQVQVAGDMLPNSTERAITIAGIPQSIIEC(+57.02)VKQIC(+57.02)VVMLETLSQSPPKGVTIPY(+79.97)RPKPS(+79.97)S(+79.97)	ESTGAQVQVAGDMLPNSTERAITIAGIPQSIIEC(+57.02)VKQIC(+57.02)VVMLETLSQSPPKGVTIPY(+79.97)RPKPS(+79.97)S(+79.97)				0	0	0			0	0
Q16539	MAPK14	HTDDEMT(+79.97)GY(+79.97)VATR	HTDDEMT(+79.97)GY(+79.97)VATR	268000	309000	230000	193200	178240				0	0		0	0
Q16539	MAPK14	HTDDEMTGY(+79.97)VATR	HTDDEMTGY(+79.97)VATR	6410000	7720000	6180000	5.02833e+06	5.11567e+06	973000	907000	865000	664833	437390		0.132217	0.0855002
Q16836	HADH	LDY(+79.97)VGLDTTK	LDY(+79.97)VGLDTTK			36500	36500	36500				0	0		0	0
Q71U36	TUBA1A	NEAIY(+79.97)DIC(+57.02)R	NEAIY(+79.97)DIC(+57.02)R	0	0	0	0	0				0	0
Q86YV5	PRAG1	ATQPEPIY(+79.97)AESTK	ATQPEPIY(+79.97)AESTK	522000	515000	479000	278875	278875	83000	78800		113814	74877.8		0.408119	0.2685
Q8WWW8	GAB3	VDY(+79.97)VQVDEQK	VDY(+79.97)VQVDEQK	25100	46000		35550	35550				0	0		0	0
Q92835	INPP5D	KLY(+79.97)DFVK	KLY(+79.97)DFVK	114000		123000	118500	118500				0	0		0	0
Q92973	TNPO1	WN(+.98)MLKDEDKDLFPLLEC(+57.02)LSSVATALQSGFLPYC(+57.02)EPVY(+79.97)QRC(+57.02)VNLVQ(+.98)K	WN(+.98)MLKDEDKDLFPLLEC(+57.02)LSSVATALQSGFLPYC(+57.02)EPVY(+79.97)QRC(+57.02)VNLVQ(+.98)K				0	0	0			0	0
Q99704	DOK1	SHNSALY(+79.97)SQVQK	SHNSALY(+79.97)SQVQK	69600	171000	141000	127200	127200	59700	38600	57700	52000	34210.5		0.408805	0.268951
Q99704	DOK1	VKEEGYELPYNPATDDY(+79.97)AVPPPR	VKEEGYELPYNPATDDY(+79.97)AVPPPR			498000	498000	498000	107000		60700	83850	55164.5		0.168373	0.110772
Q9BXI2	SLC25A2	GTGPALMAYVAEN(+.98)SVLFMC(+57.02)Y(+79.97)GFC(+57.02)QQFVRKVAGMDK	GTGPALMAYVAEN(+.98)SVLFMC(+57.02)Y(+79.97)GFC(+57.02)QQFVRKVAGMDK			0	0	0				0	0
Q9H422	HIPK3	TVC(+57.02)STY(+79.97)LQSR	TVC(+57.02)STY(+79.97)LQSR	143000	142000	109000	105360	105360				0	0		0	0
Q9H6L5	RETREG1	VY(+79.97)HLISVMILGRVIMQ(+.98)IIKDMVLSRT(+79.97)R	VY(+79.97)HLISVMILGRVIMQ(+.98)IIKDMVLSRT(+79.97)R				0	0		0		0	0
Q9NRY4	ARHGAP35	NEEENIY(+79.97)SVPHDSTQGK	NEEENIY(+79.97)SVPHDSTQGK	896000	1040000	838000	924667	924667	305000	306000		305500	200987		0.330389	0.217361
Q9NUJ1	ABHD10	YSEEGVY(+79.97)NVQYSFIK	YSEEGVY(+79.97)NVQYSFIK	147000	164000	263000	191333	191333	83500	61500		72500	47697.4		0.37892	0.249289
Q9NWQ8	PAG1	AEFAEY(+79.97)ASVDR	AEFAEY(+79.97)ASVDR	96500	114000	109000	106500	106500	86200	67400	66900	73500	48355.3		0.690141	0.45404
Q9NWQ8	PAG1	ENDY(+79.97)ESISDLQQGR	ENDY(+79.97)ESISDLQQGR	84800	109000	94800	92550	92550	43800			41066.7	27017.5		0.443724	0.291924
Q9NWQ8	PAG1	SPSSC(+57.02)NDLY(+79.97)ATVK	SPSSC(+57.02)NDLY(+79.97)ATVK	71500			71500	71500				0	0		0	0
Q9NWQ8	PAG1	SREEDPTLTEEEISAMY(+79.97)SSVNKPGQLVNK	SREEDPTLTEEEISAMY(+79.97)SSVNKPGQLVNK				0	0	1400000	1000000	975000	939000	617763		#DIV/0!	#DIV/0!
Q9NWQ8	PAG1	SVDGDQGLGMEGPY(+79.97)EVLK	SVDGDQGLGMEGPY(+79.97)EVLK	148000	145000	155000	163500	163500				0	0		0	0
Q9NY15	STAB1	KGGHRNSLLGPAHWIVFY(+79.97)NHSGQPEVNHVPLEGPM(+15.99)LEAPGRS(+79.97)LIGL	KGGHRNSLLGPAHWIVFY(+79.97)NHSGQPEVNHVPLEGPM(+15.99)LEAPGRS(+79.97)LIGL				0	0	122000			122000	80263.2		#DIV/0!	#DIV/0!
Q9UBQ7	GRHPR	ETAVFINISRGDVVN(+.98)Q(+.98)DDLY(+79.97)QALASGK	ETAVFINISRGDVVN(+.98)Q(+.98)DDLY(+79.97)QALASGK				0	0			512000	512000	336842		#DIV/0!	#DIV/0!
Q9Y463	DYRK1B	IYQY(+79.97)IQSR	IYQY(+79.97)IQSR	1200000	1420000	1190000	1.11017e+06	1.11017e+06	210000	190000	200000	187000	123026		0.168443	0.110818
A0A075B730	EPPK1	LRGRAVPVWDVLASGY(+79.97)VSGAAREELLAEFGSGT(+79.97)LDLPALT(+79.97)R	LRGRAVPVWDVLASGY(+79.97)VSGAAREELLAEFGSGT(+79.97)LDLPALT(+79.97)R				0	0			0	0	0
A0A087WVF7	ITSN2	EEPEALY(+79.97)AAVNK	EEPEALY(+79.97)AAVNK	329000	366000	358000	706556	706556	96600	90700	81400	226212	148824		0.320162	0.210633
A0A0A0MR54	SCARF1	QAEEERQEEPEY(+79.97)ENVVPISRPPEP	QAEEERQEEPEY(+79.97)ENVVPISRPPEP		1400000		579500	579500			524000	966571	635902		1.66794	1.09733
A0A0A0MS51	GSN	KLAKLY(+79.97)KVSNGAGTMSVS(+79.97)LVADENPFAQ(+.98)GALK	KLAKLY(+79.97)KVSNGAGTMSVS(+79.97)LVADENPFAQ(+.98)GALK				0	0			0	0	0
A0A0A0MS51	GSN	VPVDPATY(+79.97)GQ(+.98)FYGGDS(+79.97)	VPVDPATY(+79.97)GQ(+.98)FYGGDS(+79.97)				0	0	12600			12600	8289.47		#DIV/0!	#DIV/0!
A0A0B4J1Y2	TTC21A	EYDKAVQSYKDVFS(+79.97)YLPTDNKVMLELAQLY(+79.97)LLQGHLDLC(+57.02)EQHC(+57.02)AILLQT(+79.97)EQNHET	EYDKAVQSYKDVFS(+79.97)YLPTDNKVMLELAQLY(+79.97)LLQGHLDLC(+57.02)EQHC(+57.02)AILLQT(+79.97)EQNHET				0	0	0			0	0
A0A0G2JRG8	ARHGAP27	AC(+57.02)SVAGSWVC(+57.02)PRPLARSDSENVYEVIQDLHVPPREESAEQVDDPPEPVY(+79.97)ANIERQPR	AC(+57.02)SVAGSWVC(+57.02)PRPLARSDSENVYEVIQDLHVPPREESAEQVDDPPEPVY(+79.97)ANIERQPR				0	0			219000	219000	144079		#DIV/0!	#DIV/0!
E7EMB8	PTPN18	SAEEAPLY(+79.97)SKVTPR	SAEEAPLY(+79.97)SKVTPR				324000	324000	537000	314000	312000	442333	291009		1.36523	0.898175
E9PJF0	MAPK3	IADPEHDHTGFLT(+79.97)EY(+79.97)VATR	IADPEHDHTGFLT(+79.97)EY(+79.97)VATR		139000	205000	172000	172000				0	0		0	0
E9PJF0	MAPK3	IADPEHDHTGFLTEY(+79.97)VATR	IADPEHDHTGFLTEY(+79.97)VATR	424000	462000	510000	465333	465333				0	0		0	0
E9PNT2	ARHGAP27	ALPAQVDDPPEPVY(+79.97)ANIER	ALPAQVDDPPEPVY(+79.97)ANIER	741000	1090000	1240000	1.02367e+06	1.02367e+06	1790000	1880000	1570000	2.42333e+06	1.5943e+06		2.36731	1.55744
F5GZ78	PXN	VGEEEHVY(+79.97)SFPNK	VGEEEHVY(+79.97)SFPNK	304000	348000	281000	311000	311000	152000	140000		146000	96052.6		0.469453	0.308851
H0Y3C5	HCK	YTATESQY(+79.97)QQQP	YTATESQY(+79.97)QQQP	2830000	3640000	2610000	3.02667e+06	3.02667e+06		533000	562000	547500	360197		0.180892	0.119008
H0Y4R1	IMPDH2	KQ(+.98)LLC(+57.02)GAAIGTHEDDKY(+79.97)RLDLLAQAGVDVVVLDSSQGNSIFQINM(+15.99)IK	KQ(+.98)LLC(+57.02)GAAIGTHEDDKY(+79.97)RLDLLAQAGVDVVVLDSSQGNSIFQINM(+15.99)IK				0	0	73200			73200	48157.9		#DIV/0!	#DIV/0!
H0YAR3	TOP1MT	LNY(+79.97)LDPR	LNY(+79.97)LDPR	120000	156000	121000	132333	132333	84000	68000	79500	77166.7	50767.5		0.583123	0.383634
K7EK35	STAT5A	AVDGY(+79.97)VKPQIK	AVDGY(+79.97)VKPQIK	268000	400000	298000	322000	322000	110000	86800	100000	98933.3	65087.7		0.307246	0.202136
Q5SQL3	HIPK1	AVC(+57.02)STY(+79.97)LQSR	AVC(+57.02)STY(+79.97)LQSR		68300	59900	64100	64100				0	0		0	0

## Sheet: Regulated pY Proteins
				protein	CTL	osimertinib
plasma membrane				P28906-CD34-Y329	148575	0
plasma membrane				Q92835-INPP5D-Y865	118500	0
plasma membrane				Q9NWQ8-PAG1-Y163	163500	0
plasma membrane				Q9NWQ8-PAG1-Y359	71500	0
plasma membrane				P05556-ITGB1-Y783	66566.7	0
plasma membrane				P26038-MSN-Y270	59500	0
plasma membrane				O00401-WASL-Y256	135500	0
plasma membrane				P07355-ANXA2-Y30	215667	0
plasma membrane				P07355-ANXA2-Y317	78000	0
plasma membrane				P08670-VIM-Y53	12400	0
plasma membrane				P0DP24-CALM2-Y100	160000	0
plasma membrane				P18433-PTPRA-Y798	72100	0
plasma membrane				P23469-PTPRE-Y696	128500	0
plasma membrane				P53396-ACLY-Y682	147000	0
plasma membrane				Q9NWQ8-PAG1-Y417	92550	27017.5
plasma membrane				P16284-PECAM1-Y713	204417	34819.1
plasma membrane				Q9NWQ8-PAG1-Y227	106500	48355.3
plasma membrane				P29353-SHC1-Y427	178667	50131.6
plasma membrane				P16333-NCK1-Y105	551000	74078.9
plasma membrane				P07355-ANXA2-Y24	281333	88157.9
plasma membrane				F5GZ78-PXN-Y116	311000	96052.6
plasma membrane				Q9NRY4-ARHGAP35-Y1105	924667	200987
plasma membrane				P40763-STAT3-Y705	1.08167e+07	501908
plasma membrane	Tyrosine-protein Kinase			P07948-LYN-Y473	79533.3	0
plasma membrane	Tyrosine-protein Kinase			P06213-INSR-Y1189	120883	0
plasma membrane	Tyrosine-protein Kinase			Q14289-PTK2B-Y579	240667	0
plasma membrane	Tyrosine-protein Kinase			Q14289-PTK2B-Y573	56500	0
plasma membrane	Tyrosine-protein Kinase			Q14289-PTK2B-Y580	28400	0
plasma membrane	Tyrosine-protein Kinase			P42680-TEC-Y519	997333	0
plasma membrane	Tyrosine-protein Kinase			Q86YV5-PRAG1-Y413	278875	74877.8
plasma membrane	Tyrosine-protein Kinase			P06241-FYN-Y420	605333	113596
plasma membrane	Tyrosine-protein Kinase			Q9Y463-DYRK1B-Y273	1.11017e+06	123026
	Tyrosine-protein Kinase			Q07912-TNK2-Y859	478000	193421
	Tyrosine-protein Kinase			P12931-SRC-Y530	649500	239885
	Tyrosine-protein Kinase			Q07912-TNK2-Y518	1015500	358333
	Tyrosine-protein Kinase			H0Y3C5-HCK-Y521	3.02667e+06	360197
	Tyrosine-protein Kinase			P07948-LYN-Y397	1.62427e+06	375559
	Tyrosine-protein Kinase			P06241-FYN-Y531	3178750	471053
	Tyrosine-protein Kinase			P07948-LYN-Y508	19835000	4.62939e+06
				O00459-PIK3R2-Y464	48550	0
				P53778-MAPK12-Y185	247750	0
				Q06124-PTPN11-Y546	14300	0
				E9PJF0-MAPK3-Y204	465333	0
				P00338-LDHA-Y239	65200	0
				P00367-GLUD1-Y512	62300	0
				P07108-DBI-Y29	128000	0
				P07195-LDHB-Y240	37200	0
				P08238-HSP90AB1-Y484	76033.3	0
				P08559-PDHA1-Y243	37800	0
				P08559-PDHA1-Y242	32550	0
				P11413-G6PD-Y401	50800	0
				P24941-CDK2-Y19	50966.7	0
				P68104-EEF1A1-Y29	61000	0
				P68104-EEF1A1-Y141	59900	0
				Q01082-SPTBN1-Y831	6410	0
				Q16836-HADH-Y264	36500	0
				Q5SQL3-HIPK1-Y352	64100	0
				Q8WWW8-GAB3-Y560	35550	0
				Q9H422-HIPK3-Y359	105360	0
				O75995-SASH3-Y189	179333	16052.6
				Q99704-DOK1-Y449	127200	34210.5
				Q9NUJ1-ABHD10-Y215	191333	47697.4
				H0YAR3-TOP1MT-Y69	132333	50767.5
				Q99704-DOK1-Y409	498000	55164.5
				O60496-DOK2-Y299	318000	62828.9
				K7EK35-STAT5A-Y663	322000	65087.7
				Q06124-PTPN11-Y62	959000	98903.5
				A0A087WVF7-ITSN2-Y951	706556	148824
				P24941-CDK2-Y15	1.44333e+06	162719
				P28482-MAPK1-Y187	1525000	176316
				Q16539-MAPK14-Y182	5.11567e+06	437390
				P49840-GSK3A-Y279	9940000	482091
Cell membrane				P0C7N1-OR8U8-Y168	0	3.36842e+06
Cell membrane				Q9NWQ8-PAG1-Y317	0	617763
Cell membrane				P09429-HMGB1-Y16	0	122368
Cell membrane				P06733-ENO1-Y44	0	83552.6
Cell membrane				P11274-BCR-Y177	0	83333.3
Cell membrane				P15144-ANPEP-Y692	0	29078.9
Cell membrane				Q07912-TNK2-Y284	54500	193421
				Q9UBQ7-GRHPR-Y255	0	336842
				P58546-MTPN-Y77	0	259211
				A0A0G2JRG8-ARHGAP27-Y228	0	144079
				Q13509-TUBB3-Y422	0	141447
				Q9NY15-STAB1-Y1221	0	80263.2
				O60667-FCMR-Y315	0	52127.2
				H0Y4R1-IMPDH2-Y190	0	48157.9
				P98160-HSPG2-Y2534	0	32565.8
				P46109-CRKL-Y207	0	13947.4
				Q14190-SIM2-Y21	0	11052.6
				A0A0A0MS51-GSN-Y431	0	8289.47
				E9PNT2-ARHGAP27-Y28	1.02367e+06	1.5943e+06
