# Supplementary material for: CD34 is a target for covalent EGFR inhibitors to eliminate stem/progenitor cells in acute and chronic myeloid leukemia
Source: Research Square preprint supplement (doi:10.21203/rs.3.rs-646513/v1), 2021-07-12
Supplement: Supplementary file 3 [file a773df27e3009b20ca7f391f.xlsx]

## Sheet: all pY Peptides Motif analysis
Supplementary Table 3: Motif analysis by Scaffold PTM of regulated tyrosine-phosphorylated peptides between vehicle or osimertinib treated CD34+ cells.
Modification	Surrounding Sequence	Accession	Name	Site	Best Ascore	Localization Probability
Phospho	DPGERLyDLNMPA	sp|P16333|NCK1_HUMAN	Cytoplasmic protein NCK1 OS=Homo sapiens OX=9606 GN=NCK1 PE=1 SV=1	Y105	81.89	1
Phospho	NEEENIySVPHDS	sp|Q9NRY4|RHG35_HUMAN	Rho GTPase-activating protein 35 OS=Homo sapiens OX=9606 GN=ARHGAP35 PE=1 SV=3	Y1105	38.62	0.999998
Phospho	GEEEHVySFPNKQ	tr|F5GZ78|F5GZ78_HUMAN	Paxillin OS=Homo sapiens OX=9606 GN=PXN PE=1 SV=1	Y116	61.94	1
Phospho	DIYETDyYRKGGK	sp|P06213|INSR_HUMAN	Insulin receptor OS=Homo sapiens OX=9606 GN=INSR PE=1 SV=4	Y1189	23.19	0.995227
Phospho	KIGEGTyGVVYKA	sp|P24941|CDK2_HUMAN	Cyclin-dependent kinase 2 OS=Homo sapiens OX=9606 GN=CDK2 PE=1 SV=2	Y15	52.16	1
Phospho	LGMEGPyEVLKDS	sp|Q9NWQ8|PHAG1_HUMAN	Phosphoprotein associated with glycosphingolipid-enriched microdomains 1 OS=Homo sapiens OX=9606 GN=PAG1 PE=1 SV=2	Y163	70.93	1
Phospho	YSEEGVyNVQYSF	sp|Q9NUJ1|ABHDA_HUMAN	Mycophenolic acid acyl-glucuronide esterase, mitochondrial OS=Homo sapiens OX=9606 GN=ABHD10 PE=1 SV=1	Y215	60.5	1
Phospho	DPPEPVyANIERQ	tr|A0A0G2JRG8|A0A0G2JRG8_HUMAN	Rho GTPase-activating protein 27 OS=Homo sapiens OX=9606 GN=ARHGAP27 PE=1 SV=1	Y228	1.05	0.18982
Phospho	QVVESAyEVIKLK	sp|P00338|LDHA_HUMAN	L-lactate dehydrogenase A chain OS=Homo sapiens OX=9606 GN=LDHA PE=1 SV=2	Y239	48.15	1
Phospho	MVVESAyEVIKLK	sp|P07195|LDHB_HUMAN	L-lactate dehydrogenase B chain OS=Homo sapiens OX=9606 GN=LDHB PE=1 SV=2	Y240	0	0.5
Phospho	DPPEPVyANIERQ	tr|E9PNT2|E9PNT2_HUMAN	Rho GTPase-activating protein 27 OS=Homo sapiens OX=9606 GN=ARHGAP27 PE=1 SV=1	Y28	1000	1
Phospho	RGQEGEyAVPFDA	sp|O60496|DOK2_HUMAN	Docking protein 2 OS=Homo sapiens OX=9606 GN=DOK2 PE=1 SV=2	Y299	1000	1
Phospho	RLGEDPyYTENGG	sp|P28906|CD34_HUMAN	Hematopoietic progenitor cell antigen CD34 OS=Homo sapiens OX=9606 GN=CD34 PE=1 SV=2	Y329	21.95	0.980762
Phospho	QPNEAVyTKMMTK	sp|P11413|G6PD_HUMAN	Glucose-6-phosphate 1-dehydrogenase OS=Homo sapiens OX=9606 GN=G6PD PE=1 SV=4	Y401	0	0.5
Phospho	TQPEPIyAESTKR	sp|Q86YV5|PRAG1_HUMAN	Inactive tyrosine-protein kinase PRAG1 OS=Homo sapiens OX=9606 GN=PRAG1 PE=1 SV=4	Y413	65.61	1
Phospho	VPKENDyESISDL	sp|Q9NWQ8|PHAG1_HUMAN	Phosphoprotein associated with glycosphingolipid-enriched microdomains 1 OS=Homo sapiens OX=9606 GN=PAG1 PE=1 SV=2	Y417	86.89	1
Phospho	TATEGQyQQQP	sp|P07948|LYN_HUMAN	Tyrosine-protein kinase Lyn OS=Homo sapiens OX=9606 GN=LYN PE=1 SV=3	Y508	61.15	1
Phospho	TATESQyQQQP	tr|H0Y3C5|H0Y3C5_HUMAN	Tyrosine-protein kinase OS=Homo sapiens OX=9606 GN=HCK PE=1 SV=1	Y521	24.95	0.999812
Phospho	TSTEPQyQPGENL	sp|P12931|SRC_HUMAN	Proto-oncogene tyrosine-protein kinase Src OS=Homo sapiens OX=9606 GN=SRC PE=1 SV=3	Y530	81.39	1
Phospho	TATEPQyQPGENL	sp|P06241|FYN_HUMAN	Tyrosine-protein kinase Fyn OS=Homo sapiens OX=9606 GN=FYN PE=1 SV=3	Y531	74.37	1
Phospho	IEDEDYyKASVTR	sp|Q14289|FAK2_HUMAN	Protein-tyrosine kinase 2-beta OS=Homo sapiens OX=9606 GN=PTK2B PE=1 SV=2	Y580	27.96	0.999186
Phospho	PYCEPVyQRCVNL	sp|Q92973|TNPO1_HUMAN	Transportin-1 OS=Homo sapiens OX=9606 GN=TNPO1 PE=1 SV=2	Y617	0	0.166667
Phospho	LIEERQyMPWEAA	sp|P15144|AMPN_HUMAN	Aminopeptidase N OS=Homo sapiens OX=9606 GN=ANPEP PE=1 SV=4	Y692	0	0.222222
Phospho	KDTETVySEVRKA	sp|P16284|PECA1_HUMAN	Platelet endothelial cell adhesion molecule OS=Homo sapiens OX=9606 GN=PECAM1 PE=1 SV=2	Y713	42.85	0.999999
Phospho	RQEEPEyENVVPI	tr|A0A0A0MR54|A0A0A0MR54_HUMAN	Scavenger receptor class F member 1 OS=Homo sapiens OX=9606 GN=SCARF1 PE=1 SV=1	Y732	92.59	1
Phospho	SGIEERyKEVAEL	sp|Q01082|SPTB2_HUMAN	Spectrin beta chain, non-erythrocytic 1 OS=Homo sapiens OX=9606 GN=SPTBN1 PE=1 SV=2	Y831	76.06	1
Phospho	KTREKLyDFVKTE	sp|Q92835|SHIP1_HUMAN	Phosphatidylinositol 3,4,5-trisphosphate 5-phosphatase 1 OS=Homo sapiens OX=9606 GN=INPP5D PE=1 SV=2	Y865	1000	1
Phospho	EEPEALyAAVNKK	tr|A0A087WVF7|A0A087WVF7_HUMAN	Intersectin-2 OS=Homo sapiens OX=9606 GN=ITSN2 PE=1 SV=1	Y951	1000	1
END OF FILE
all pY Peptides Motif analysis
Modification	Motif	Score	# Matches	Enzyme	Enzyme Type	Citation	Dataset %	Background %	Foreground Origin	Background Origin
Phospho	...E..y......	9.48776	28	ALK kinase substrate motif	kinase	http://www.ncbi.nlm.nih.gov/entrez/query.fcgi?cmd=Retrieve&db=pubmed&dopt=Abstract&list_uids=16273072	0.267327	0.066502	103 PTM sites: sp|O00401|WASL_HUMAN: {Y256}; sp|O00459|P85B_HUMAN: {Y464}; sp|O60496|DOK2_HUMAN: {Y299}; sp|O60667|FAIM3_HUMAN: {Y315}; sp|O75995|SASH3_HUMAN: {Y189}; sp|P0C7N1|OR8U8_HUMAN: {Y168}; sp|P0DP24|CALM2_HUMAN: {Y100}; sp|P00338|LDHA_HUMAN: {Y239}; sp|P00367|DHE3_HUMAN: {Y512}; sp|P05556|ITB1_HUMAN: {Y783}; sp|P06213|INSR_HUMAN: {Y1189}; sp|P06241|FYN_HUMAN: {Y420, Y531}; sp|P06733|ENOA…	D:\FASTA\uniprot-proteome_Homo sapiens.fasta

## Sheet: Down-pY Peptides Motif analysis
Motif analysis by ScaffoldPTM
Modification	Surrounding Sequence	Accession	Name	Site	Best Ascore	Localization Probability
Phospho	DPGERLyDLNMPA	sp|P16333|NCK1_HUMAN	Cytoplasmic protein NCK1 OS=Homo sapiens OX=9606 GN=NCK1 PE=1 SV=1	Y105	81.89	1
Phospho	NEEENIySVPHDS	sp|Q9NRY4|RHG35_HUMAN	Rho GTPase-activating protein 35 OS=Homo sapiens OX=9606 GN=ARHGAP35 PE=1 SV=3	Y1105	38.62	0.999998
Phospho	GEEEHVySFPNKQ	tr|F5GZ78|F5GZ78_HUMAN	Paxillin OS=Homo sapiens OX=9606 GN=PXN PE=1 SV=1	Y116	61.94	1
Phospho	DIYETDyYRKGGK	sp|P06213|INSR_HUMAN	Insulin receptor OS=Homo sapiens OX=9606 GN=INSR PE=1 SV=4	Y1189	23.19	0.995227
Phospho	KIGEGTyGVVYKA	sp|P24941|CDK2_HUMAN	Cyclin-dependent kinase 2 OS=Homo sapiens OX=9606 GN=CDK2 PE=1 SV=2	Y15	52.16	1
Phospho	LGMEGPyEVLKDS	sp|Q9NWQ8|PHAG1_HUMAN	Phosphoprotein associated with glycosphingolipid-enriched microdomains 1 OS=Homo sapiens OX=9606 GN=PAG1 PE=1 SV=2	Y163	70.93	1
Phospho	YSEEGVyNVQYSF	sp|Q9NUJ1|ABHDA_HUMAN	Mycophenolic acid acyl-glucuronide esterase, mitochondrial OS=Homo sapiens OX=9606 GN=ABHD10 PE=1 SV=1	Y215	60.5	1
Phospho	QVVESAyEVIKLK	sp|P00338|LDHA_HUMAN	L-lactate dehydrogenase A chain OS=Homo sapiens OX=9606 GN=LDHA PE=1 SV=2	Y239	48.15	1
Phospho	MVVESAyEVIKLK	sp|P07195|LDHB_HUMAN	L-lactate dehydrogenase B chain OS=Homo sapiens OX=9606 GN=LDHB PE=1 SV=2	Y240	0	0.5
Phospho	RGQEGEyAVPFDA	sp|O60496|DOK2_HUMAN	Docking protein 2 OS=Homo sapiens OX=9606 GN=DOK2 PE=1 SV=2	Y299	1000	1
Phospho	RLGEDPyYTENGG	sp|P28906|CD34_HUMAN	Hematopoietic progenitor cell antigen CD34 OS=Homo sapiens OX=9606 GN=CD34 PE=1 SV=2	Y329	21.95	0.980762
Phospho	QPNEAVyTKMMTK	sp|P11413|G6PD_HUMAN	Glucose-6-phosphate 1-dehydrogenase OS=Homo sapiens OX=9606 GN=G6PD PE=1 SV=4	Y401	0	0.5
Phospho	TQPEPIyAESTKR	sp|Q86YV5|PRAG1_HUMAN	Inactive tyrosine-protein kinase PRAG1 OS=Homo sapiens OX=9606 GN=PRAG1 PE=1 SV=4	Y413	65.61	1
Phospho	VPKENDyESISDL	sp|Q9NWQ8|PHAG1_HUMAN	Phosphoprotein associated with glycosphingolipid-enriched microdomains 1 OS=Homo sapiens OX=9606 GN=PAG1 PE=1 SV=2	Y417	86.89	1
Phospho	TATEGQyQQQP	sp|P07948|LYN_HUMAN	Tyrosine-protein kinase Lyn OS=Homo sapiens OX=9606 GN=LYN PE=1 SV=3	Y508	61.15	1
Phospho	TATESQyQQQP	tr|H0Y3C5|H0Y3C5_HUMAN	Tyrosine-protein kinase OS=Homo sapiens OX=9606 GN=HCK PE=1 SV=1	Y521	24.95	0.999812
Phospho	TSTEPQyQPGENL	sp|P12931|SRC_HUMAN	Proto-oncogene tyrosine-protein kinase Src OS=Homo sapiens OX=9606 GN=SRC PE=1 SV=3	Y530	81.39	1
Phospho	TATEPQyQPGENL	sp|P06241|FYN_HUMAN	Tyrosine-protein kinase Fyn OS=Homo sapiens OX=9606 GN=FYN PE=1 SV=3	Y531	74.37	1
Phospho	IEDEDYyKASVTR	sp|Q14289|FAK2_HUMAN	Protein-tyrosine kinase 2-beta OS=Homo sapiens OX=9606 GN=PTK2B PE=1 SV=2	Y580	27.96	0.999186
Phospho	KDTETVySEVRKA	sp|P16284|PECA1_HUMAN	Platelet endothelial cell adhesion molecule OS=Homo sapiens OX=9606 GN=PECAM1 PE=1 SV=2	Y713	42.85	0.999999
Phospho	SGIEERyKEVAEL	sp|Q01082|SPTB2_HUMAN	Spectrin beta chain, non-erythrocytic 1 OS=Homo sapiens OX=9606 GN=SPTBN1 PE=1 SV=2	Y831	76.06	1
Phospho	KTREKLyDFVKTE	sp|Q92835|SHIP1_HUMAN	Phosphatidylinositol 3,4,5-trisphosphate 5-phosphatase 1 OS=Homo sapiens OX=9606 GN=INPP5D PE=1 SV=2	Y865	1000	1
Phospho	EEPEALyAAVNKK	tr|A0A087WVF7|A0A087WVF7_HUMAN	Intersectin-2 OS=Homo sapiens OX=9606 GN=ITSN2 PE=1 SV=1	Y951	1000	1
END OF FILE
								DOWN
Downregulated pY Peptides Motif analysis
Modification	Motif	Score	# Matches	Enzyme	Enzyme Type	Citation	Dataset %	Background %	Foreground Origin	Background Origin
Phospho	...E..y......	10.3062	23	ALK kinase substrate motif	kinase	http://www.ncbi.nlm.nih.gov/entrez/query.fcgi?cmd=Retrieve&db=pubmed&dopt=Abstract&list_uids=16273072	0.333333	0.066502	70 PTM sites: sp|O00401|WASL_HUMAN: {Y256}; sp|O00459|P85B_HUMAN: {Y464}; sp|O60496|DOK2_HUMAN: {Y299}; sp|O75995|SASH3_HUMAN: {Y189}; sp|P0DP24|CALM2_HUMAN: {Y100}; sp|P00338|LDHA_HUMAN: {Y239}; sp|P00367|DHE3_HUMAN: {Y512}; sp|P05556|ITB1_HUMAN: {Y783}; sp|P06213|INSR_HUMAN: {Y1189}; sp|P06241|FYN_HUMAN: {Y420, Y531}; sp|P07108|ACBP_HUMAN: {Y29}; sp|P07195|LDHB_HUMAN: {Y240}; sp|P07355|ANXA2_HU…	D:\FASTA\uniprot-proteome_Homo sapiens.fasta
