# Supplementary material for: CD34 is a target for covalent EGFR inhibitors to eliminate stem/progenitor cells in acute and chronic myeloid leukemia
Source: Research Square preprint supplement (doi:10.21203/rs.3.rs-646513/v1), 2021-07-12
Supplement: Supplementary file 4 [file b094c8b17133b312e89c89df.xlsx]

## Sheet: GO analysis of Down regulated
Category	Term	Count	%	PValue	Genes	List Total	Pop Hits	Pop Total	Fold Enrichment	Bonferroni	Benjamini	FDR
UP_KEYWORDS	Phosphoprotein	53	94.6429	1.14175e-17	P07355, P00367, Q01082, P12931, P23469, Q14289, Q8WWW8, P53778, P18433, K7EK35, H0Y3C5, P0DP24, E9PJF0, P53396, P06213, O60496, P08559, P29353, O00401, P68104, Q86YV5, A0A087WVF7, P05556, P26038, O75995, F5GZ78, Q92835, P08238, P11413, Q07912, Q5SQL3, Q16539, O00459, Q9NWQ8, Q9H422, P42680, P08670, Q06124, P28482, P06241, Q9NRY4, P49840, P07948, P00338, P16284, P24941, P07195, Q99704, P07108, P28…	56	8246	20581	2.36217	1.59845e-15	1.59845e-15	1.34715e-14
UP_KEYWORDS	Kinase	22	39.2857	7.78499e-17	Q86YV5, P12931, Q14289, P53778, P24941, Q99704, Q9H422, P42680, H0Y3C5, P0DP24, E9PJF0, P28482, P06241, Q07912, O00459, Q5SQL3, Q9Y463, P06213, Q16539, O60496, P49840, P07948	56	735	20581	11.0005	1.55431e-14	7.77156e-15	1.33227e-13
UP_SEQ_FEATURE	active site:Proton acceptor	21	37.5	3.80003e-16	Q86YV5, P12931, Q14289, P00338, P53778, P07195, P24941, Q9H422, P42680, H0Y3C5, E9PJF0, P11413, P28482, P06241, Q07912, Q5SQL3, Q9Y463, P06213, Q16539, P49840, P07948	56	672	20063	11.1959	7.42739e-14	7.42739e-14	4.21885e-13
UP_KEYWORDS	SH2 domain	12	21.4286	4.89174e-15	P42680, Q92835, H0Y3C5, P12931, Q06124, P06241, O00459, P16333, K7EK35, P29353, P40763, P07948	56	108	20581	40.8353	6.83897e-13	2.27929e-13	5.76206e-12
UP_SEQ_FEATURE	domain:Protein kinase	18	32.1429	5.79382e-15	Q86YV5, P12931, Q14289, P53778, P24941, Q9H422, P42680, H0Y3C5, E9PJF0, P28482, P06241, Q07912, Q5SQL3, Q9Y463, P06213, Q16539, P49840, P07948	56	478	20063	13.4913	1.28741e-12	6.43707e-13	7.36078e-12
INTERPRO	IPR017441:Protein kinase, ATP binding site	17	30.3571	7.54107e-15	P12931, Q14289, P53778, P24941, Q9H422, P42680, H0Y3C5, E9PJF0, P28482, P06241, Q07912, Q5SQL3, Q9Y463, P06213, Q16539, P49840, P07948	55	381	18559	15.0562	1.23812e-12	1.23812e-12	9.15934e-12
INTERPRO	IPR000719:Protein kinase, catalytic domain	18	32.1429	1.93484e-14	Q86YV5, P12931, Q14289, P53778, P24941, Q9H422, P42680, H0Y3C5, E9PJF0, P28482, P06241, Q07912, Q5SQL3, Q9Y463, P06213, Q16539, P49840, P07948	55	487	18559	12.472	3.16813e-12	1.58407e-12	2.34257e-11
INTERPRO	IPR000980:SH2 domain	12	21.4286	1.99748e-14	P42680, Q92835, H0Y3C5, P12931, Q06124, P06241, O00459, P16333, K7EK35, P29353, P40763, P07948	55	113	18559	35.834	3.27738e-12	1.09246e-12	2.42362e-11
UP_SEQ_FEATURE	binding site:ATP	18	32.1429	7.18659e-14	Q86YV5, P12931, Q14289, P53778, P24941, Q9H422, P42680, H0Y3C5, E9PJF0, P28482, P06241, Q07912, Q5SQL3, Q9Y463, P06213, Q16539, P49840, P07948	56	558	20063	11.557	1.60184e-11	5.33951e-12	9.16378e-11
INTERPRO	IPR011009:Protein kinase-like domain	18	32.1429	7.93583e-14	Q86YV5, P12931, Q14289, P53778, P24941, Q9H422, P42680, H0Y3C5, E9PJF0, P28482, P06241, Q07912, Q5SQL3, Q9Y463, P06213, Q16539, P49840, P07948	55	531	18559	11.4385	1.30185e-11	3.25462e-12	9.62563e-11
GOTERM_BP_DIRECT	GO:0050900~leukocyte migration	12	21.4286	1.71921e-13	Q92835, P28906, P12931, P05556, P26038, Q06124, P16284, P06241, O00459, O60496, P29353, P07948	56	122	16792	29.4941	1.46521e-10	1.46521e-10	2.66165e-10
GOTERM_CC_DIRECT	GO:0005829~cytosol	35	62.5	4.07626e-13	P07355, Q01082, P12931, Q14289, P53778, K7EK35, P42680, H0Y3C5, P0DP24, E9PJF0, P08670, Q06124, P28482, P53396, P06241, Q9NRY4, O60496, P49840, P29353, P07948, O00401, P68104, P00338, P24941, P07195, Q99704, F5GZ78, Q92835, P08238, P11413, Q16539, P16333, O00459, P40763, Q9NUJ1	55	3315	18224	3.49837	7.21583e-11	7.21583e-11	5.00744e-10
GOTERM_BP_DIRECT	GO:0038083~peptidyl-tyrosine autophosphorylation	9	16.0714	5.52395e-13	P42680, H0Y3C5, P12931, E9PJF0, Q14289, P06241, Q07912, P06213, P07948	56	40	16792	67.4679	4.70685e-10	2.35342e-10	8.55027e-10
UP_SEQ_FEATURE	domain:SH2	10	17.8571	4.75283e-12	P42680, Q92835, H0Y3C5, P12931, P06241, P16333, K7EK35, P29353, P40763, P07948	56	96	20063	37.3196	1.05989e-09	2.64972e-10	6.06329e-09
UP_KEYWORDS	Tyrosine-protein kinase	10	17.8571	1.55735e-11	P42680, H0Y3C5, Q86YV5, P12931, Q14289, P06241, Q07912, P06213, Q9Y463, P07948	56	112	20581	32.8141	2.18028e-09	5.4507e-10	1.83751e-08
SMART	SM00252:SH2	11	19.6429	1.92795e-11	P42680, Q92835, H0Y3C5, P12931, Q06124, P06241, O00459, P16333, K7EK35, P29353, P07948	46	103	10057	23.3489	7.90458e-10	7.90458e-10	1.77423e-08
UP_SEQ_FEATURE	nucleotide phosphate-binding region:ATP	19	33.9286	7.03011e-11	Q86YV5, P12931, Q14289, P53778, P24941, Q9H422, P42680, H0Y3C5, E9PJF0, P28482, P53396, P06241, Q07912, Q5SQL3, Q9Y463, P06213, Q16539, P49840, P07948	56	994	20063	6.84818	1.56771e-08	3.13543e-09	8.96841e-08
GOTERM_MF_DIRECT	GO:0004715~non-membrane spanning protein tyrosine kinase activity	8	14.2857	9.70959e-11	P42680, H0Y3C5, Q86YV5, P12931, Q14289, P06241, Q07912, P07948	54	46	16881	54.3671	2.01959e-08	2.01959e-08	1.22481e-07
UP_KEYWORDS	Transferase	23	41.0714	1.28916e-10	Q86YV5, P12931, Q14289, P53778, P24941, Q99704, Q9H422, P42680, H0Y3C5, P0DP24, E9PJF0, P28482, P53396, P06241, Q07912, O00459, Q5SQL3, Q9Y463, P06213, Q16539, O60496, P49840, P07948	56	1708	20581	4.94901	1.80483e-08	3.60966e-09	1.52109e-07
UP_KEYWORDS	ATP-binding	21	37.5	1.77714e-10	P00367, Q86YV5, P12931, Q14289, P53778, P24941, Q9H422, P42680, H0Y3C5, P08238, E9PJF0, P28482, P53396, P06241, Q07912, Q5SQL3, Q9Y463, P06213, Q16539, P49840, P07948	56	1391	20581	5.54844	2.488e-08	4.14666e-09	2.09685e-07
GOTERM_BP_DIRECT	GO:0038096~Fc-gamma receptor signaling pathway involved in phagocytosis	10	17.8571	2.88309e-10	H0Y3C5, P12931, P08238, E9PJF0, P28482, P06241, O00459, P16333, O00401, P07948	56	127	16792	23.6108	2.45639e-07	8.18797e-08	4.46216e-07
INTERPRO	IPR008266:Tyrosine-protein kinase, active site	9	16.0714	2.99419e-10	P42680, H0Y3C5, Q86YV5, P12931, Q14289, P06241, Q07912, P06213, P07948	55	95	18559	31.9677	4.91047e-08	9.82095e-09	3.6307e-07
GOTERM_BP_DIRECT	GO:0007169~transmembrane receptor protein tyrosine kinase signaling pathway	9	16.0714	8.28181e-10	P42680, H0Y3C5, P06241, Q07912, Q9NWQ8, P06213, Q99704, O60496, P07948	56	96	16792	28.1116	7.0561e-07	1.76403e-07	1.28178e-06
GOTERM_BP_DIRECT	GO:0018108~peptidyl-tyrosine phosphorylation	10	17.8571	1.5194e-09	P42680, H0Y3C5, Q86YV5, P12931, Q14289, P06241, P06213, Q9Y463, K7EK35, P07948	56	153	16792	19.5985	1.29452e-06	2.58905e-07	2.35157e-06
UP_KEYWORDS	Nucleotide-binding	22	39.2857	2.16141e-09	P68104, P00367, Q86YV5, P12931, Q14289, P53778, P24941, Q9H422, P42680, H0Y3C5, P08238, E9PJF0, P28482, P53396, P06241, Q07912, Q5SQL3, Q9Y463, P06213, Q16539, P49840, P07948	56	1788	20581	4.52203	3.02598e-07	4.32283e-08	2.55025e-06
GOTERM_BP_DIRECT	GO:0048010~vascular endothelial growth factor receptor signaling pathway	8	14.2857	3.40471e-09	P12931, Q14289, P06241, P53778, Q16539, O00459, P16333, F5GZ78	56	72	16792	33.3175	2.90081e-06	4.83469e-07	5.26947e-06
KEGG_PATHWAY	hsa04062:Chemokine signaling pathway	12	21.4286	3.64311e-09	H0Y3C5, P12931, E9PJF0, Q14289, P28482, O00459, P49840, P29353, F5GZ78, P40763, O00401, P07948	40	186	6879	11.0952	5.82898e-07	5.82898e-07	4.39902e-06
KEGG_PATHWAY	hsa04917:Prolactin signaling pathway	9	16.0714	4.10029e-09	P12931, E9PJF0, P28482, P53778, Q16539, O00459, K7EK35, P29353, P40763	40	71	6879	21.7996	6.56046e-07	3.28023e-07	4.95105e-06
INTERPRO	IPR020635:Tyrosine-protein kinase, catalytic domain	8	14.2857	4.89115e-09	P42680, H0Y3C5, P12931, Q14289, P06241, Q07912, P06213, P07948	55	85	18559	31.7587	8.02148e-07	1.33691e-07	5.93091e-06
UP_KEYWORDS	SH3 domain	10	17.8571	5.25417e-09	P42680, H0Y3C5, A0A087WVF7, P12931, P06241, Q07912, O00459, P16333, O75995, P07948	56	215	20581	17.0939	7.35583e-07	9.19479e-08	6.19939e-06
UP_KEYWORDS	Cytoplasm	34	60.7143	6.63788e-09	Q01082, P12931, P23469, Q14289, P53778, Q9H422, K7EK35, P42680, H0Y3C5, P0DP24, E9PJF0, P08670, Q06124, P28482, P53396, P06241, Q9NRY4, P29353, P07948, O00401, P68104, A0A087WVF7, P26038, P00338, P24941, P07195, Q99704, F5GZ78, Q92835, P08238, Q16539, Q5SQL3, P16333, P40763	56	4816	20581	2.5946	9.29303e-07	1.03256e-07	7.83204e-06
GOTERM_MF_DIRECT	GO:0004713~protein tyrosine kinase activity	9	16.0714	7.90149e-09	H0Y3C5, P12931, Q14289, P06241, Q07912, P06213, Q9Y463, K7EK35, P07948	54	133	16881	21.1541	1.64351e-06	8.21755e-07	9.96728e-06
GOTERM_MF_DIRECT	GO:0005524~ATP binding	21	37.5	9.06167e-09	P00367, Q86YV5, P12931, Q14289, P53778, P24941, Q9H422, P42680, H0Y3C5, P08238, E9PJF0, P28482, P53396, P06241, Q07912, Q5SQL3, Q9Y463, P06213, Q16539, P49840, P07948	54	1495	16881	4.39119	1.88483e-06	6.28276e-07	1.14308e-05
KEGG_PATHWAY	hsa04670:Leukocyte transendothelial migration	10	17.8571	1.0361e-08	P05556, Q14289, P26038, Q06124, P16284, P53778, Q9NRY4, Q16539, O00459, F5GZ78	40	115	6879	14.9543	1.65775e-06	5.52585e-07	1.25107e-05
INTERPRO	IPR001452:Src homology-3 domain	10	17.8571	1.21367e-08	P42680, H0Y3C5, A0A087WVF7, P12931, P06241, Q07912, O00459, P16333, O75995, P07948	55	218	18559	15.4787	1.99042e-06	2.84347e-07	1.47168e-05
UP_KEYWORDS	Acetylation	28	50	2.57085e-08	P07355, P00367, Q01082, P0DP24, P08670, E9PJF0, Q06124, P28482, P53396, P08559, P49840, P29353, O00401, P68104, P05556, P26038, P00338, P24941, P07195, P07108, Q99704, F5GZ78, P08238, P11413, Q16539, P16333, Q16836, P40763	56	3424	20581	3.0054	3.59918e-06	3.59919e-07	3.03334e-05
KEGG_PATHWAY	hsa04611:Platelet activation	10	17.8571	3.05596e-08	P12931, P05556, E9PJF0, P28482, P06241, P53778, Q9NRY4, Q16539, O00459, P07948	40	130	6879	13.2288	4.88952e-06	1.22238e-06	3.69003e-05
GOTERM_CC_DIRECT	GO:0031234~extrinsic component of cytoplasmic side of plasma membrane	7	12.5	4.83342e-08	P42680, H0Y3C5, P12931, Q14289, P06241, Q07912, P07948	55	68	18224	34.1091	8.55512e-06	4.27757e-06	5.93685e-05
KEGG_PATHWAY	hsa04664:Fc epsilon RI signaling pathway	8	14.2857	8.05782e-08	Q92835, E9PJF0, P28482, P06241, P53778, Q16539, O00459, P07948	40	68	6879	20.2324	1.28924e-05	2.5785e-06	9.72971e-05
SMART	SM00219:TyrKc	8	14.2857	8.39211e-08	P42680, H0Y3C5, P12931, Q14289, P06241, Q07912, P06213, P07948	46	85	10057	20.577	3.44076e-06	1.72038e-06	7.72299e-05
KEGG_PATHWAY	hsa05205:Proteoglycans in cancer	11	19.6429	1.05082e-07	P12931, P05556, E9PJF0, P26038, Q06124, P28482, P53778, Q16539, O00459, F5GZ78, P40763	40	200	6879	9.45862	1.6813e-05	2.80219e-06	0.000126886
GOTERM_BP_DIRECT	GO:0060397~JAK-STAT cascade involved in growth hormone signaling pathway	5	8.92857	1.36865e-07	E9PJF0, P28482, K7EK35, P40763, P07948	56	15	16792	99.9524	0.000116602	1.66583e-05	0.000211826
GOTERM_CC_DIRECT	GO:0045121~membrane raft	9	16.0714	1.54988e-07	P07355, Q92835, P05556, Q14289, P16284, P06241, Q9NWQ8, P07195, P07948	55	206	18224	14.4763	2.74325e-05	9.14424e-06	0.00019037
INTERPRO	IPR001245:Serine-threonine/tyrosine-protein kinase catalytic domain	8	14.2857	1.57495e-07	P42680, H0Y3C5, P12931, Q14289, P06241, Q07912, P06213, P07948	55	140	18559	19.2821	2.58288e-05	3.22863e-06	0.000190974
BIOCARTA	h_biopeptidesPathway:Bioactive Peptide Induced Signaling Pathway	9	16.0714	2.21719e-07	P0DP24, E9PJF0, Q14289, P28482, P06241, Q16539, K7EK35, P29353, P40763	32	38	1625	12.0271	2.99316e-05	2.99316e-05	0.000259936
UP_KEYWORDS	Ubl conjugation	19	33.9286	2.27195e-07	P07355, P68104, P05556, P12931, P00338, P53778, Q9H422, K7EK35, H0Y3C5, P0DP24, P08238, P08670, P28482, P53396, Q07912, O00459, Q5SQL3, Q16539, P07948	56	1705	20581	4.09551	3.18068e-05	2.89156e-06	0.000268067
SMART	SM00326:SH3	10	17.8571	2.49365e-07	P42680, H0Y3C5, A0A087WVF7, P12931, P06241, Q07912, O00459, P16333, O75995, P07948	46	206	10057	10.6131	1.02239e-05	3.40798e-06	0.000229482
UP_SEQ_FEATURE	domain:SH3	8	14.2857	4.85778e-07	P42680, H0Y3C5, P12931, P06241, Q07912, O00459, O75995, P07948	56	175	20063	16.378	0.000108323	1.80546e-05	0.000619712
GOTERM_CC_DIRECT	GO:0005737~cytoplasm	34	60.7143	6.71997e-07	P00367, Q01082, P12931, P23469, Q14289, P53778, Q9H422, K7EK35, P0DP24, P08670, Q06124, P28482, P53396, Q9NRY4, P07948, P68104, A0A087WVF7, P05556, P26038, P00338, P24941, P07195, Q99704, O75995, F5GZ78, P28906, P08238, P11413, Q07912, Q16539, Q5SQL3, P16333, Q16836, P40763	55	5222	18224	2.15736	0.000118936	2.97354e-05	0.000825404
UP_KEYWORDS	Host-virus interaction	10	17.8571	7.59942e-07	H0Y3C5, P12931, P05556, E9PJF0, P08670, P28482, P06241, P29353, P40763, P07948	56	385	20581	9.54592	0.000106386	8.86595e-06	0.000896652
GOTERM_MF_DIRECT	GO:0016301~kinase activity	9	16.0714	7.82483e-07	P0DP24, P12931, E9PJF0, P28482, Q07912, O00459, P24941, Q99704, O60496	54	241	16881	11.6743	0.000162743	4.06883e-05	0.000987053
UP_KEYWORDS	Serine/threonine-protein kinase	10	17.8571	9.01462e-07	E9PJF0, P28482, Q07912, P53778, Q16539, Q9Y463, P24941, Q5SQL3, P49840, Q9H422	56	393	20581	9.3516	0.000126197	9.70801e-06	0.00106363
KEGG_PATHWAY	hsa04370:VEGF signaling pathway	7	12.5	9.83048e-07	P12931, E9PJF0, P28482, P53778, Q16539, O00459, F5GZ78	40	61	6879	19.7348	0.000157275	2.24694e-05	0.00118701
GOTERM_BP_DIRECT	GO:0007173~epidermal growth factor receptor signaling pathway	6	10.7143	1.05288e-06	P12931, Q14289, Q06124, Q9NWQ8, P29353, F5GZ78	56	56	16792	32.1276	0.000896653	0.000112126	0.00162953
KEGG_PATHWAY	hsa04660:T cell receptor signaling pathway	8	14.2857	1.16683e-06	P42680, E9PJF0, P28482, P06241, P53778, Q16539, O00459, P16333	40	100	6879	13.758	0.000186676	2.33364e-05	0.00140893
KEGG_PATHWAY	hsa05131:Shigellosis	7	12.5	1.31103e-06	P12931, P05556, E9PJF0, P28482, P53778, Q16539, O00401	40	64	6879	18.8098	0.000209742	2.33069e-05	0.00158304
GOTERM_BP_DIRECT	GO:0007172~signal complex assembly	4	7.14286	1.84052e-06	P12931, Q14289, P16333, F5GZ78	56	8	16792	149.929	0.0015669	0.000174221	0.00284854
GOTERM_BP_DIRECT	GO:0006468~protein phosphorylation	11	19.6429	1.93423e-06	P42680, H0Y3C5, E9PJF0, Q14289, P28482, P06241, Q9Y463, Q5SQL3, P49840, Q9H422, P07948	56	456	16792	7.2334	0.00164661	0.000164783	0.00299358
GOTERM_BP_DIRECT	GO:0000165~MAPK cascade	9	16.0714	2.03841e-06	Q01082, P0DP24, E9PJF0, Q14289, P28482, P06241, P18433, P53778, P29353	56	262	16792	10.3004	0.00173522	0.000157872	0.0031548
GOTERM_MF_DIRECT	GO:0004674~protein serine/threonine kinase activity	10	17.8571	2.28657e-06	E9PJF0, P28482, Q07912, P53778, Q16539, Q9Y463, P24941, Q5SQL3, P49840, Q9H422	54	376	16881	8.31413	0.000475495	9.51171e-05	0.00288434
GOTERM_MF_DIRECT	GO:0005515~protein binding	45	80.3571	2.4104e-06	P07355, Q01082, P00367, P12931, P23469, Q14289, P53778, P18433, Q9NWQ8, K7EK35, P42680, H0Y3C5, P0DP24, E9PJF0, P08670, Q06124, P28482, P53396, P06241, P06213, O60496, P49840, P29353, O00401, P07948, P68104, A0A087WVF7, P05556, P26038, P16284, P00338, P24941, P07195, Q99704, F5GZ78, Q92835, P08238, P11413, Q07912, Q16539, Q9Y463, Q5SQL3, P16333, O00459, P40763	54	8785	16881	1.60131	0.000501238	8.35572e-05	0.00304054
GOTERM_MF_DIRECT	GO:0005158~insulin receptor binding	5	8.92857	2.55834e-06	P12931, Q06124, Q99704, O60496, P29353	54	31	16881	50.4211	0.000531994	7.60165e-05	0.00322715
BIOCARTA	h_metPathway:Signaling of Hepatocyte Growth Factor Receptor	8	14.2857	2.55986e-06	P12931, P05556, E9PJF0, Q14289, Q06124, P28482, F5GZ78, P40763	32	36	1625	11.2847	0.000345522	0.000172776	0.00300106
GOTERM_BP_DIRECT	GO:0060020~Bergmann glial cell differentiation	4	7.14286	2.75438e-06	E9PJF0, P08670, Q06124, P28482	56	9	16792	133.27	0.00234398	0.000195542	0.00426287
BIOCARTA	h_ecmPathway:Erk and PI-3 Kinase Are Necessary for Collagen Binding in Corneal Epithelia	7	12.5	3.0755e-06	P12931, P05556, E9PJF0, P28482, P06241, P29353, F5GZ78	32	24	1625	14.8112	0.000415107	0.000138388	0.00360557
GOTERM_BP_DIRECT	GO:0007165~signal transduction	16	28.5714	3.09481e-06	P12931, Q14289, P16284, P53778, Q9NWQ8, Q99704, F5GZ78, Q92835, P28906, P28482, O00459, Q16539, O60496, P40763, P29353, P07948	56	1161	16792	4.1324	0.00263331	0.000202809	0.00478973
GOTERM_BP_DIRECT	GO:0018105~peptidyl-serine phosphorylation	7	12.5	3.24428e-06	P12931, E9PJF0, P28482, P53778, Q16539, P24941, Q9H422	56	125	16792	16.792	0.00276032	0.000197419	0.00502106
GOTERM_BP_DIRECT	GO:0031663~lipopolysaccharide-mediated signaling pathway	5	8.92857	3.45965e-06	H0Y3C5, E9PJF0, P28482, Q16539, P07948	56	32	16792	46.8527	0.00294329	0.000196489	0.00535438
INTERPRO	IPR011993:Pleckstrin homology-like domain	10	17.8571	3.52927e-06	P42680, Q01082, A0A087WVF7, Q14289, P26038, Q8WWW8, Q99704, O60496, P29353, O00401	55	427	18559	7.90249	0.000578634	6.43092e-05	0.00427944
KEGG_PATHWAY	hsa04722:Neurotrophin signaling pathway	8	14.2857	3.99415e-06	P0DP24, E9PJF0, Q06124, P28482, P53778, Q16539, O00459, P29353	40	120	6879	11.465	0.000638861	6.39045e-05	0.00482278
UP_SEQ_FEATURE	short sequence motif:TXY	4	7.14286	4.21433e-06	E9PJF0, P28482, P53778, Q16539	56	12	20063	119.423	0.000939356	0.000134248	0.00537615
INTERPRO	IPR003527:Mitogen-activated protein (MAP) kinase, conserved site	4	7.14286	5.02852e-06	E9PJF0, P28482, P53778, Q16539	55	12	18559	112.479	0.000824339	8.24645e-05	0.00609731
GOTERM_CC_DIRECT	GO:0005634~nucleus	33	58.9286	6.06956e-06	P07355, Q01082, P12931, P23469, Q14289, Q9H422, K7EK35, H0Y3C5, P0DP24, E9PJF0, Q06124, P28482, P06241, Q9NRY4, H0YAR3, P08559, P07948, O00401, P68104, P26038, P00338, P24941, Q99704, O75995, P08238, P11413, Q07912, Q16539, Q9Y463, Q5SQL3, P16333, O00459, P40763	55	5415	18224	2.01928	0.00107374	0.00021484	0.00745493
GOTERM_CC_DIRECT	GO:0070062~extracellular exosome	23	41.0714	6.49082e-06	P07355, P68104, Q01082, A0A087WVF7, P05556, P12931, P26038, P16284, P00338, P18433, P07195, P07108, P0DP24, P08238, E9PJF0, P08670, P11413, P28482, P53396, P06213, Q16539, P07948, O00401	55	2811	18224	2.71112	0.00114822	0.000191462	0.00797232
KEGG_PATHWAY	hsa04666:Fc gamma R-mediated phagocytosis	7	12.5	6.54376e-06	Q92835, H0Y3C5, E9PJF0, P28482, O00459, O00401, P07948	40	84	6879	14.3312	0.00104646	9.51777e-05	0.00790122
KEGG_PATHWAY	hsa04012:ErbB signaling pathway	7	12.5	8.02921e-06	P12931, E9PJF0, P28482, O00459, P16333, K7EK35, P29353	40	87	6879	13.8371	0.00128385	0.000107051	0.00969474
KEGG_PATHWAY	hsa04914:Progesterone-mediated oocyte maturation	7	12.5	8.02921e-06	P08238, E9PJF0, P28482, P53778, Q16539, O00459, P24941	40	87	6879	13.8371	0.00128385	0.000107051	0.00969474
BIOCARTA	h_pyk2Pathway:Links between Pyk2 and Map Kinases	7	12.5	8.15953e-06	P0DP24, P12931, E9PJF0, Q14289, P28482, Q16539, P29353	32	28	1625	12.6953	0.00110093	0.000275347	0.00956557
KEGG_PATHWAY	hsa04068:FoxO signaling pathway	8	14.2857	8.3197e-06	E9PJF0, P28482, P53778, Q16539, P06213, O00459, P24941, P40763	40	134	6879	10.2672	0.00133027	0.000102391	0.0100455
GOTERM_BP_DIRECT	GO:0048013~ephrin receptor signaling pathway	6	10.7143	8.9107e-06	P12931, Q06124, P06241, P16333, O00401, P07948	56	86	16792	20.9203	0.0075632	0.000474384	0.0137902
GOTERM_MF_DIRECT	GO:0004707~MAP kinase activity	4	7.14286	1.03804e-05	E9PJF0, P28482, P53778, Q16539	54	14	16881	89.3175	0.0021568	0.000269855	0.0130935
KEGG_PATHWAY	hsa04912:GnRH signaling pathway	7	12.5	1.04244e-05	P0DP24, P12931, E9PJF0, Q14289, P28482, P53778, Q16539	40	91	6879	13.2288	0.00166653	0.00011913	0.0125867
GOTERM_CC_DIRECT	GO:0005856~cytoskeleton	9	16.0714	1.25664e-05	P42680, Q92835, H0Y3C5, E9PJF0, P08670, Q14289, P26038, P28482, F5GZ78	55	371	18224	8.03803	0.00222179	0.000317701	0.015434
KEGG_PATHWAY	hsa05161:Hepatitis B	8	14.2857	1.39836e-05	P12931, E9PJF0, Q14289, P28482, O00459, P24941, K7EK35, P40763	40	145	6879	9.48828	0.00223489	0.000149149	0.0168837
GOTERM_MF_DIRECT	GO:0004672~protein kinase activity	9	16.0714	1.48793e-05	Q86YV5, P12931, Q07912, P53778, Q16539, Q9Y463, P24941, Q5SQL3, Q9H422	54	359	16881	7.83705	0.00309013	0.00034382	0.0187677
KEGG_PATHWAY	hsa05203:Viral carcinogenesis	9	16.0714	1.5071e-05	P12931, E9PJF0, P28482, O00459, P24941, K7EK35, F5GZ78, P40763, P07948	40	205	6879	7.55012	0.00240847	0.000150699	0.0181965
KEGG_PATHWAY	hsa04510:Focal adhesion	9	16.0714	1.5616e-05	P12931, P05556, E9PJF0, P28482, P06241, Q9NRY4, O00459, P29353, F5GZ78	40	206	6879	7.51347	0.00249547	0.000146965	0.0188546
KEGG_PATHWAY	hsa04915:Estrogen signaling pathway	7	12.5	1.69535e-05	P0DP24, P12931, P08238, E9PJF0, P28482, O00459, P29353	40	99	6879	12.1598	0.00270891	0.000150688	0.0204692
GOTERM_BP_DIRECT	GO:0007229~integrin-mediated signaling pathway	6	10.7143	1.77193e-05	P42680, H0Y3C5, P12931, P05556, Q14289, Q06124	56	99	16792	18.1732	0.0149836	0.000887665	0.0274207
KEGG_PATHWAY	hsa04810:Regulation of actin cytoskeleton	9	16.0714	1.7966e-05	P12931, P05556, E9PJF0, P26038, P28482, Q9NRY4, O00459, F5GZ78, O00401	40	210	6879	7.37036	0.00287046	0.000151283	0.0216916
KEGG_PATHWAY	hsa04015:Rap1 signaling pathway	9	16.0714	1.7966e-05	P0DP24, P12931, P05556, E9PJF0, P28482, P53778, Q16539, P06213, O00459	40	210	6879	7.37036	0.00287046	0.000151283	0.0216916
GOTERM_BP_DIRECT	GO:0008284~positive regulation of cell proliferation	10	17.8571	1.84849e-05	H0Y3C5, P05556, Q14289, P28482, P06213, P24941, Q5SQL3, P29353, P40763, P07948	56	466	16792	6.4347	0.0156259	0.000874579	0.0286053
GOTERM_CC_DIRECT	GO:0005739~mitochondrion	15	26.7857	2.32604e-05	P00367, P12931, P53778, P07195, P08238, E9PJF0, Q06124, P28482, P06241, H0YAR3, Q16539, Q16836, P08559, P49840, Q9NUJ1	55	1331	18224	3.73417	0.00410868	0.00051451	0.0285668
SMART	SM00220:S_TKc	10	17.8571	2.416e-05	Q86YV5, E9PJF0, P28482, P53778, Q16539, Q9Y463, P24941, Q5SQL3, P49840, Q9H422	46	359	10057	6.08998	0.000990081	0.000247612	0.0222315
GOTERM_BP_DIRECT	GO:0038095~Fc-epsilon receptor signaling pathway	7	12.5	2.45727e-05	P42680, P0DP24, E9PJF0, P28482, O00459, P29353, P07948	56	178	16792	11.7921	0.0207186	0.0011013	0.0380244
GOTERM_BP_DIRECT	GO:0000187~activation of MAPK activity	6	10.7143	2.58198e-05	E9PJF0, Q06124, P28482, Q16539, P06213, P29353	56	107	16792	16.8144	0.0217586	0.00109933	0.0399539
GOTERM_MF_DIRECT	GO:0005070~SH3/SH2 adaptor activity	5	8.92857	2.818e-05	A0A087WVF7, P12931, Q06124, Q9NWQ8, P16333	54	56	16881	27.9117	0.00584437	0.00058598	0.0355416
GOTERM_BP_DIRECT	GO:0030168~platelet activation	6	10.7143	3.65437e-05	P12931, E9PJF0, Q06124, P28482, P06241, P07948	56	115	16792	15.6447	0.0306561	0.00148156	0.0565438
GOTERM_CC_DIRECT	GO:0005901~caveola	5	8.92857	4.07647e-05	H0Y3C5, P12931, E9PJF0, P28482, P06213	55	65	18224	25.4881	0.00718953	0.0008014	0.0500593
KEGG_PATHWAY	hsa04520:Adherens junction	6	10.7143	4.45278e-05	P12931, E9PJF0, P28482, P06241, P06213, O00401	40	71	6879	14.5331	0.00709929	0.000356167	0.0537536
GOTERM_CC_DIRECT	GO:0005913~cell-cell adherens junction	8	14.2857	4.46183e-05	P07355, Q01082, P12931, P08238, P05556, P00338, P16333, P07948	55	323	18224	8.2067	0.00786651	0.00078945	0.0547904
BIOCARTA	h_integrinPathway:Integrin Signaling Pathway	7	12.5	4.46261e-05	P12931, P05556, E9PJF0, P28482, P06241, P29353, F5GZ78	32	37	1625	9.60726	0.00600655	0.00120421	0.0523058
KEGG_PATHWAY	hsa05220:Chronic myeloid leukemia	6	10.7143	4.76535e-05	E9PJF0, Q06124, P28482, O00459, K7EK35, P29353	40	72	6879	14.3312	0.00759575	0.000363017	0.0575259
GOTERM_BP_DIRECT	GO:0016032~viral process	8	14.2857	5.16328e-05	H0Y3C5, E9PJF0, P08670, P28482, P06241, P29353, P40763, P07948	56	299	16792	8.02293	0.0430386	0.00199765	0.0798822
KEGG_PATHWAY	hsa05169:Epstein-Barr virus infection	7	12.5	5.56028e-05	P08670, P53778, Q16539, O00459, P24941, P40763, P07948	40	122	6879	9.86742	0.00885723	0.000404313	0.067119
KEGG_PATHWAY	hsa04650:Natural killer cell mediated cytotoxicity	7	12.5	5.56028e-05	E9PJF0, Q14289, Q06124, P28482, P06241, O00459, P29353	40	122	6879	9.86742	0.00885723	0.000404313	0.067119
KEGG_PATHWAY	hsa05133:Pertussis	6	10.7143	5.80595e-05	P0DP24, P05556, E9PJF0, P28482, P53778, Q16539	40	75	6879	13.758	0.00924677	0.000403822	0.0700836
KEGG_PATHWAY	hsa05100:Bacterial invasion of epithelial cells	6	10.7143	7.01418e-05	P12931, P05556, O00459, P29353, F5GZ78, O00401	40	78	6879	13.2288	0.0111603	0.000467519	0.0846624
GOTERM_MF_DIRECT	GO:0046875~ephrin receptor binding	4	7.14286	7.21959e-05	P12931, P06241, P16333, P29353	54	26	16881	48.094	0.0149051	0.00136428	0.0910328
GOTERM_BP_DIRECT	GO:0051090~regulation of sequence-specific DNA binding transcription factor activity	4	7.14286	7.26667e-05	H0Y3C5, E9PJF0, P28482, Q16539	56	25	16792	47.9771	0.0600365	0.0026883	0.112407
GOTERM_BP_DIRECT	GO:0007265~Ras protein signal transduction	5	8.92857	8.04408e-05	Q16539, P24941, Q99704, O60496, P29353	56	70	16792	21.4184	0.0662423	0.00285169	0.124426
GOTERM_BP_DIRECT	GO:0043547~positive regulation of GTPase activity	10	17.8571	8.28203e-05	Q01082, A0A087WVF7, P0DP24, P05556, P06241, P18433, Q9NRY4, O00459, P16333, P29353	56	565	16792	5.30721	0.0681336	0.00281865	0.128104
KEGG_PATHWAY	hsa04380:Osteoclast differentiation	7	12.5	8.2824e-05	P42680, E9PJF0, P28482, P06241, P53778, Q16539, O00459	40	131	6879	9.1895	0.013165	0.000529955	0.0999631
KEGG_PATHWAY	hsa05162:Measles	7	12.5	9.01176e-05	P26038, P06241, O00459, P24941, Q99704, K7EK35, P40763	40	133	6879	9.05132	0.014316	0.000554441	0.108762
GOTERM_BP_DIRECT	GO:0050852~T cell receptor signaling pathway	6	10.7143	0.000121266	Q92835, P28482, P06241, Q9NWQ8, O00459, P16333	56	148	16792	12.1564	0.0981664	0.00396616	0.187519
GOTERM_BP_DIRECT	GO:0008286~insulin receptor signaling pathway	5	8.92857	0.000122739	P18433, P06213, O00459, P49840, P29353	56	78	16792	19.2216	0.0992976	0.00386585	0.189795
GOTERM_BP_DIRECT	GO:0014066~regulation of phosphatidylinositol 3-kinase signaling	5	8.92857	0.000122739	E9PJF0, Q06124, P28482, P06241, O00459	56	78	16792	19.2216	0.0992976	0.00386585	0.189795
GOTERM_CC_DIRECT	GO:0005925~focal adhesion	8	14.2857	0.000147347	H0Y3C5, P05556, E9PJF0, P08670, Q14289, P26038, P28482, F5GZ78	55	391	18224	6.77945	0.0257452	0.00236832	0.180835
GOTERM_BP_DIRECT	GO:0007411~axon guidance	6	10.7143	0.000169691	Q01082, E9PJF0, P28482, P06241, P18433, Q9NRY4	56	159	16792	11.3154	0.134622	0.00515057	0.262308
INTERPRO	IPR016040:NAD(P)-binding domain	6	10.7143	0.000170245	P00367, P11413, P00338, P53396, P07195, Q16836	55	179	18559	11.3107	0.0275364	0.0025352	0.206241
UP_KEYWORDS	Cytoskeleton	12	21.4286	0.000178136	P42680, Q92835, H0Y3C5, Q01082, P0DP24, P12931, P26038, P28482, Q9NRY4, P24941, F5GZ78, O00401	56	1138	20581	3.87541	0.0246329	0.00177994	0.209981
GOTERM_BP_DIRECT	GO:0006928~movement of cell or subcellular component	5	8.92857	0.000179217	P08670, P26038, Q16539, P40763, O00401	56	86	16792	17.4336	0.141619	0.00525192	0.277015
BIOCARTA	h_erkPathway:Erk1/Erk2 Mapk Signaling pathway	6	10.7143	0.000184173	P12931, P05556, E9PJF0, P28482, P29353, P40763	32	30	1625	10.1562	0.024559	0.0041357	0.215706
KEGG_PATHWAY	hsa04066:HIF-1 signaling pathway	6	10.7143	0.000188534	E9PJF0, P28482, P06213, O00459, P08559, P40763	40	96	6879	10.7484	0.0297177	0.00111672	0.227415
GOTERM_BP_DIRECT	GO:0010976~positive regulation of neuron projection development	5	8.92857	0.000204569	Q14289, P06241, Q9NRY4, P16333, P07948	56	89	16792	16.8459	0.159964	0.00579351	0.316143
KEGG_PATHWAY	hsa04621:NOD-like receptor signaling pathway	5	8.92857	0.000262181	P08238, E9PJF0, P28482, P53778, Q16539	40	56	6879	15.3549	0.0410865	0.00149725	0.316121
KEGG_PATHWAY	hsa05221:Acute myeloid leukemia	5	8.92857	0.000262181	E9PJF0, P28482, O00459, K7EK35, P40763	40	56	6879	15.3549	0.0410865	0.00149725	0.316121
INTERPRO	IPR008271:Serine/threonine-protein kinase, active site	7	12.5	0.000281891	E9PJF0, P28482, Q9Y463, P24941, Q5SQL3, P49840, Q9H422	55	312	18559	7.57069	0.045184	0.00384564	0.34128
GOTERM_MF_DIRECT	GO:0098641~cadherin binding involved in cell-cell adhesion	7	12.5	0.00028441	P07355, Q01082, P12931, P08238, P05556, P00338, P16333	54	290	16881	7.54579	0.0574494	0.00491834	0.358175
GOTERM_BP_DIRECT	GO:2000641~regulation of early endosome to late endosome transport	3	5.35714	0.000291239	P12931, E9PJF0, P28482	56	8	16792	112.446	0.219774	0.00797357	0.449801
BIOCARTA	h_at1rPathway:Angiotensin II mediated activation of JNK Pathway via Pyk2 dependent signaling	6	10.7143	0.00029455	P0DP24, P12931, E9PJF0, Q14289, P28482, P29353	32	33	1625	9.23295	0.0389896	0.00566533	0.344776
UP_KEYWORDS	Immunity	8	14.2857	0.000354485	P42680, Q92835, H0Y3C5, P12931, Q14289, P06241, Q9NWQ8, P07948	56	500	20581	5.88029	0.0484249	0.00330364	0.417457
KEGG_PATHWAY	hsa05145:Toxoplasmosis	6	10.7143	0.000356302	P05556, E9PJF0, P28482, P53778, Q16539, P40763	40	110	6879	9.38045	0.0554233	0.00196422	0.429382
UP_KEYWORDS	S-nitrosylation	4	7.14286	0.000406719	P08238, P08670, P26038, P24941	56	54	20581	27.2235	0.0553608	0.00355319	0.478835
GOTERM_MF_DIRECT	GO:0005068~transmembrane receptor protein tyrosine kinase adaptor activity	3	5.35714	0.000428273	Q9NWQ8, O60496, P29353	54	10	16881	93.7833	0.0852458	0.0068304	0.5389
GOTERM_MF_DIRECT	GO:0044325~ion channel binding	5	8.92857	0.000432913	P0DP24, P12931, P08238, P06241, P07948	54	113	16881	13.8324	0.0861286	0.0064126	0.544724
UP_SEQ_FEATURE	binding site:NAD	4	7.14286	0.000437952	P00367, P00338, P07195, Q16836	56	54	20063	26.5384	0.0930652	0.0121363	0.557265
KEGG_PATHWAY	hsa05230:Central carbon metabolism in cancer	5	8.92857	0.000439023	E9PJF0, P11413, P28482, O00459, P08559	40	64	6879	13.4355	0.0678477	0.00233923	0.528828
GOTERM_BP_DIRECT	GO:0042493~response to drug	7	12.5	0.000460945	P12931, Q14289, P00338, P06241, Q16836, P40763, P07948	56	304	16792	6.90461	0.324847	0.0122004	0.711029
GOTERM_MF_DIRECT	GO:0005088~Ras guanyl-nucleotide exchange factor activity	5	8.92857	0.000462679	Q01082, P0DP24, P06241, P18433, P29353	54	115	16881	13.5918	0.0917716	0.00639675	0.582077
KEGG_PATHWAY	hsa05214:Glioma	5	8.92857	0.000465913	P0DP24, E9PJF0, P28482, O00459, P29353	40	65	6879	13.2288	0.0718514	0.00240238	0.561135
KEGG_PATHWAY	hsa05120:Epithelial cell signaling in Helicobacter pylori infection	5	8.92857	0.000523189	P12931, Q06124, P53778, Q16539, P07948	40	67	6879	12.834	0.0803224	0.00261321	0.629917
KEGG_PATHWAY	hsa04071:Sphingolipid signaling pathway	6	10.7143	0.00053236	E9PJF0, P28482, P06241, P53778, Q16539, O00459	40	120	6879	8.59875	0.0816716	0.0025785	0.640926
GOTERM_BP_DIRECT	GO:0021762~substantia nigra development	4	7.14286	0.000550605	P00367, P0DP24, P11413, P00338	56	49	16792	24.4781	0.374525	0.0141189	0.848784
UP_SEQ_FEATURE	domain:PH	6	10.7143	0.00055134	P42680, Q01082, A0A087WVF7, Q8WWW8, Q99704, O60496	56	245	20063	8.77391	0.115721	0.0135718	0.701077
GOTERM_BP_DIRECT	GO:0030278~regulation of ossification	3	5.35714	0.000568477	E9PJF0, P28482, Q16539	56	11	16792	81.7792	0.383983	0.0141484	0.876222
KEGG_PATHWAY	hsa04662:B cell receptor signaling pathway	5	8.92857	0.000585317	Q92835, E9PJF0, P28482, O00459, P07948	40	69	6879	12.462	0.0894242	0.00275145	0.704477
KEGG_PATHWAY	hsa05140:Leishmaniasis	5	8.92857	0.000652525	P05556, E9PJF0, P28482, P53778, Q16539	40	71	6879	12.1109	0.0991694	0.0029795	0.785075
GOTERM_MF_DIRECT	GO:0005102~receptor binding	7	12.5	0.000803399	P42680, H0Y3C5, P12931, Q14289, P26038, P16333, P07948	54	353	16881	6.19909	0.153948	0.010394	1.00873
KEGG_PATHWAY	hsa05160:Hepatitis C	6	10.7143	0.000850883	E9PJF0, P28482, P53778, Q16539, O00459, P40763	40	133	6879	7.75827	0.127331	0.00377617	1.0226
KEGG_PATHWAY	hsa04910:Insulin signaling pathway	6	10.7143	0.0010052	P0DP24, E9PJF0, P28482, P06213, O00459, P29353	40	138	6879	7.47717	0.148634	0.00433955	1.20703
UP_KEYWORDS	Alternative splicing	41	73.2143	0.00103783	P07355, P00367, Q01082, P12931, Q14289, Q8WWW8, P53778, P18433, Q9H422, K7EK35, H0Y3C5, E9PJF0, Q06124, P28482, P53396, P06241, P06213, H0YAR3, P08559, P29353, P07948, P68104, A0A087WVF7, P05556, P00338, P16284, P24941, P07108, Q99704, F5GZ78, Q92835, P28906, P11413, Q07912, Q16539, Q9Y463, Q5SQL3, P16333, Q16836, P40763, Q9NUJ1	56	10587	20581	1.42328	0.135299	0.00851483	1.2177
UP_KEYWORDS	Diabetes mellitus	4	7.14286	0.00106422	P06213, Q9Y463, P49840, P40763	56	75	20581	19.601	0.138491	0.00824747	1.24848
KEGG_PATHWAY	hsa04550:Signaling pathways regulating pluripotency of stem cells	6	10.7143	0.00107243	E9PJF0, P28482, P53778, Q16539, O00459, P40763	40	140	6879	7.37036	0.157753	0.00450775	1.28729
GOTERM_BP_DIRECT	GO:0043149~stress fiber assembly	3	5.35714	0.00107619	P12931, P05556, Q14289	56	15	16792	59.9714	0.600446	0.0258711	1.65271
INTERPRO	IPR001849:Pleckstrin homology domain	6	10.7143	0.00112822	P42680, Q01082, A0A087WVF7, Q8WWW8, Q99704, O60496	55	271	18559	7.47092	0.169006	0.01414	1.3595
GOTERM_BP_DIRECT	GO:0008360~regulation of cell shape	5	8.92857	0.00113535	H0Y3C5, Q14289, P26038, P06241, Q9NRY4	56	140	16792	10.7092	0.620109	0.0265271	1.74282
GOTERM_CC_DIRECT	GO:0031143~pseudopodium	3	5.35714	0.00113909	E9PJF0, P26038, P28482	55	17	18224	58.4727	0.182687	0.0166706	1.39017
KEGG_PATHWAY	hsa05132:Salmonella infection	5	8.92857	0.00117536	E9PJF0, P28482, P53778, Q16539, O00401	40	83	6879	10.3599	0.171524	0.0048132	1.41003
UP_KEYWORDS	Adaptive immunity	5	8.92857	0.0012029	P42680, Q14289, P06241, Q9NWQ8, P07948	56	174	20581	10.5609	0.155075	0.00882958	1.41012
KEGG_PATHWAY	hsa04960:Aldosterone-regulated sodium reabsorption	4	7.14286	0.00133725	E9PJF0, P28482, P06213, O00459	40	39	6879	17.6385	0.192734	0.00533826	1.60281
UP_SEQ_FEATURE	nucleotide phosphate-binding region:NAD	4	7.14286	0.0013795	P00367, P00338, P07195, Q16836	56	80	20063	17.9134	0.264967	0.030315	1.74564
GOTERM_BP_DIRECT	GO:0002250~adaptive immune response	5	8.92857	0.00139412	P42680, Q14289, P06241, Q9NWQ8, P07948	56	148	16792	10.1303	0.695359	0.0316144	2.13605
BIOCARTA	h_ghPathway:Growth Hormone Signaling Pathway	5	8.92857	0.00140156	E9PJF0, P28482, P06213, K7EK35, P29353	32	27	1625	9.40394	0.172498	0.0233901	1.63086
KEGG_PATHWAY	hsa05215:Prostate cancer	5	8.92857	0.00146151	P08238, E9PJF0, P28482, O00459, P24941	40	88	6879	9.77131	0.208649	0.00569138	1.75055
KEGG_PATHWAY	hsa04014:Ras signaling pathway	7	12.5	0.00154691	P0DP24, E9PJF0, Q06124, P28482, P06213, O00459, P29353	40	226	6879	5.32666	0.219403	0.00588018	1.85195
GOTERM_MF_DIRECT	GO:0019900~kinase binding	4	7.14286	0.00168229	P12931, P08238, P00338, P07195	54	75	16881	16.6726	0.29546	0.0203899	2.1015
UP_SEQ_FEATURE	mutagenesis site	15	26.7857	0.00189529	P07355, P00367, P05556, Q14289, P16284, P53778, Q9NWQ8, P24941, Q99704, Q06124, Q07912, Q9Y463, P06213, Q16539, P07948	56	2191	20063	2.45277	0.344955	0.037729	2.39109
GOTERM_BP_DIRECT	GO:0035556~intracellular signal transduction	7	12.5	0.00197738	P42680, Q92835, P12931, P06241, Q9NWQ8, Q16539, P29353	56	403	16792	5.20844	0.814814	0.0434084	3.01697
UP_KEYWORDS	Carbohydrate metabolism	4	7.14286	0.00203833	P11413, P06213, P08559, P49840	56	94	20581	15.6391	0.24848	0.0141814	2.37874
GOTERM_BP_DIRECT	GO:0032869~cellular response to insulin stimulus	4	7.14286	0.00204917	P12931, P06213, O00459, P49840	56	77	16792	15.577	0.825822	0.0438231	3.12488
GOTERM_BP_DIRECT	GO:0031295~T cell costimulation	4	7.14286	0.00212622	P12931, Q06124, P06241, P07948	56	78	16792	15.3773	0.836913	0.0443244	3.24059
GOTERM_CC_DIRECT	GO:0014069~postsynaptic density	5	8.92857	0.00214573	Q01082, P12931, Q14289, P06241, P07948	55	184	18224	9.00395	0.316276	0.0288227	2.6039
GOTERM_CC_DIRECT	GO:0005886~plasma membrane	23	41.0714	0.00215643	P07355, P05556, P12931, P23469, P26038, P16284, P18433, Q9NWQ8, F5GZ78, Q92835, P0DP24, P28906, P08670, P53396, P06241, Q07912, Q9NRY4, P16333, P06213, P40763, P29353, P07948, O00401	55	4121	18224	1.8493	0.317574	0.0269238	2.61674
KEGG_PATHWAY	hsa04750:Inflammatory mediator regulation of TRP channels	5	8.92857	0.00217393	P0DP24, P12931, P53778, Q16539, O00459	40	98	6879	8.77423	0.294048	0.00806516	2.59363
GOTERM_MF_DIRECT	GO:0042802~identical protein binding	9	16.0714	0.00218453	P00367, P08670, P11413, P28482, P00338, P06241, Q07912, P07195, P40763	54	749	16881	3.75634	0.365475	0.0249544	2.72097
GOTERM_CC_DIRECT	GO:0048471~perinuclear region of cytoplasm	8	14.2857	0.0022744	P07355, P28906, P12931, P05556, Q14289, P26038, Q99704, P07948	55	621	18224	4.26854	0.331706	0.0265108	2.75806
GOTERM_BP_DIRECT	GO:0006090~pyruvate metabolic process	3	5.35714	0.00233308	P00338, P07195, P08559	56	22	16792	40.8896	0.863319	0.04738	3.55056
GOTERM_BP_DIRECT	GO:0046777~protein autophosphorylation	5	8.92857	0.00241395	H0Y3C5, P12931, Q14289, P06213, P07948	56	172	16792	8.71678	0.87244	0.0478454	3.67149
UP_KEYWORDS	Stress response	4	7.14286	0.00243129	P08238, P53778, Q16539, O00459	56	100	20581	14.7007	0.288796	0.0160974	2.83132
KEGG_PATHWAY	hsa04930:Type II diabetes mellitus	4	7.14286	0.00244329	E9PJF0, P28482, P06213, O00459	40	48	6879	14.3313	0.323893	0.00885611	2.91065
GOTERM_BP_DIRECT	GO:0050731~positive regulation of peptidyl-tyrosine phosphorylation	4	7.14286	0.00245241	P42680, P12931, Q14289, Q07912	56	82	16792	14.6272	0.876562	0.0474871	3.72896
GOTERM_MF_DIRECT	GO:0005543~phospholipid binding	4	7.14286	0.00248852	P42680, Q01082, Q9NRY4, P29353	54	86	16881	14.5401	0.404443	0.0269081	3.09416
KEGG_PATHWAY	hsa05142:Chagas disease (American trypanosomiasis)	5	8.92857	0.00270068	E9PJF0, P28482, P53778, Q16539, O00459	40	104	6879	8.26803	0.351241	0.00956934	3.21271
KEGG_PATHWAY	hsa04620:Toll-like receptor signaling pathway	5	8.92857	0.00289417	E9PJF0, P28482, P53778, Q16539, O00459	40	106	6879	8.11203	0.371072	0.0100306	3.43921
KEGG_PATHWAY	hsa05130:Pathogenic Escherichia coli infection	4	7.14286	0.00290753	P05556, P06241, P16333, O00401	40	51	6879	13.4882	0.372419	0.00986343	3.45483
KEGG_PATHWAY	hsa04668:TNF signaling pathway	5	8.92857	0.0029944	E9PJF0, P28482, P53778, Q16539, O00459	40	107	6879	8.03621	0.381107	0.0099465	3.55634
KEGG_PATHWAY	hsa05152:Tuberculosis	6	10.7143	0.00301922	P0DP24, P12931, E9PJF0, P28482, P53778, Q16539	40	177	6879	5.82966	0.383567	0.00982501	3.58534
GOTERM_BP_DIRECT	GO:0042127~regulation of cell proliferation	5	8.92857	0.00313893	P42680, P12931, Q14289, P06241, Q07912	56	185	16792	8.10425	0.931339	0.0590608	4.74929
GOTERM_BP_DIRECT	GO:0040014~regulation of multicellular organism growth	3	5.35714	0.00325506	Q06124, K7EK35, P40763	56	26	16792	34.5989	0.937827	0.059863	4.92087
BIOCARTA	h_bcrPathway:BCR Signaling Pathway	5	8.92857	0.00337238	P0DP24, E9PJF0, Q16539, P29353, P07948	32	34	1625	7.46783	0.366212	0.0494089	3.88297
UP_KEYWORDS	Magnesium	7	12.5	0.00344831	P05556, E9PJF0, P28482, P53396, Q07912, P53778, P24941	56	552	20581	4.66055	0.383439	0.0217419	3.99376
UP_SEQ_FEATURE	lipid moiety-binding region:N-myristoyl glycine	4	7.14286	0.00397021	H0Y3C5, P12931, P06241, P07948	56	116	20063	12.3541	0.588159	0.0712601	4.94831
BIOCARTA	h_ptenPathway:PTEN dependent cell cycle arrest and apoptosis	4	7.14286	0.00422825	P05556, E9PJF0, P28482, P29353	32	18	1625	11.2847	0.435618	0.0555971	4.84622
BIOCARTA	h_spryPathway:Sprouty regulation of tyrosine kinase signals	4	7.14286	0.00422825	P12931, E9PJF0, P28482, P29353	32	18	1625	11.2847	0.435618	0.0555971	4.84622
UP_KEYWORDS	Polymorphism	43	76.7857	0.0043462	P07355, Q01082, P12931, Q14289, Q8WWW8, P53778, P18433, Q9H422, K7EK35, P42680, H0Y3C5, P0DP24, E9PJF0, P53396, P06241, P06213, H0YAR3, O60496, P08559, P49840, P29353, P07948, Q86YV5, A0A087WVF7, P00338, P16284, P24941, P07195, P07108, F5GZ78, Q92835, P28906, P08238, P11413, Q07912, Q16539, Q9Y463, Q5SQL3, P16333, O00459, Q16836, P40763, Q9NUJ1	56	12043	20581	1.31224	0.456537	0.0261644	5.00944
GOTERM_MF_DIRECT	GO:0005178~integrin binding	4	7.14286	0.00437149	P12931, P05556, F5GZ78, P07948	54	105	16881	11.909	0.597984	0.0445407	5.37654
GOTERM_BP_DIRECT	GO:0043552~positive regulation of phosphatidylinositol 3-kinase activity	3	5.35714	0.00460872	P12931, Q14289, P07948	56	31	16792	29.0184	0.980468	0.0820008	6.89982
BIOCARTA	h_agrPathway:Agrin in Postsynaptic Differentiation	5	8.92857	0.00461376	P12931, P05556, E9PJF0, P28482, F5GZ78	32	37	1625	6.86233	0.464364	0.055174	5.27721
GOTERM_BP_DIRECT	GO:0045471~response to ethanol	4	7.14286	0.00492345	Q14289, P11413, P06241, P40763	56	105	16792	11.4231	0.985081	0.0855853	7.35438
UP_SEQ_FEATURE	compositionally biased region:Pro-rich	9	16.0714	0.00492621	Q92835, Q14289, Q07912, Q9NRY4, Q99704, O60496, P29353, F5GZ78, O00401	56	978	20063	3.29694	0.667548	0.0812234	6.10562
INTERPRO	IPR000242:Protein-tyrosine phosphatase, receptor/non-receptor type	3	5.35714	0.00546266	P23469, Q06124, P18433	55	38	18559	26.6397	0.592752	0.0621513	6.42629
KEGG_PATHWAY	hsa04360:Axon guidance	5	8.92857	0.00552975	P05556, E9PJF0, P28482, P06241, P16333	40	127	6879	6.77067	0.588199	0.0175878	6.4764
BIOCARTA	h_fcer1Pathway:Fc Epsilon Receptor I Signaling in Mast Cells	5	8.92857	0.00559425	P0DP24, E9PJF0, P28482, P29353, P07948	32	39	1625	6.51042	0.53109	0.0611617	6.36533
BIOCARTA	h_bArrestin-srcPathway:Roles of 茂驴陆-arrestin-dependent Recruitment of Src Kinases in GPCR Signaling	4	7.14286	0.00575611	H0Y3C5, P12931, E9PJF0, P28482	32	20	1625	10.1562	0.541282	0.0581862	6.54386
KEGG_PATHWAY	hsa05212:Pancreatic cancer	4	7.14286	0.00577437	E9PJF0, P28482, O00459, P40763	40	65	6879	10.5831	0.604093	0.0180041	6.7538
INTERPRO	IPR016336:Receptor tyrosine-protein phosphatase, alpha/epsilon-type	2	3.57143	0.00581097	P23469, P18433	55	2	18559	337.436	0.615487	0.061731	6.82289
INTERPRO	IPR008349:Mitogen-activated protein (MAP) kinase, ERK1/2	2	3.57143	0.00581097	E9PJF0, P28482	55	2	18559	337.436	0.615487	0.061731	6.82289
GOTERM_BP_DIRECT	GO:0071902~positive regulation of protein serine/threonine kinase activity	3	5.35714	0.00584803	P0DP24, P12931, P08238	56	35	16792	25.702	0.993243	0.0988713	8.67774
KEGG_PATHWAY	hsa05200:Pathways in cancer	8	14.2857	0.00590576	P08238, P05556, E9PJF0, P28482, O00459, P24941, K7EK35, P40763	40	393	6879	3.50076	0.612377	0.0180604	6.90249
KEGG_PATHWAY	hsa05211:Renal cell carcinoma	4	7.14286	0.00602582	E9PJF0, Q06124, P28482, O00459	40	66	6879	10.4227	0.619796	0.0180807	7.03816
GOTERM_BP_DIRECT	GO:0001525~angiogenesis	5	8.92857	0.00608224	P07355, Q14289, P16284, Q16539, P29353	56	223	16792	6.72325	0.994472	0.100647	9.01016
SMART	SM00233:PH	6	10.7143	0.00622025	P42680, Q01082, A0A087WVF7, Q8WWW8, Q99704, O60496	46	264	10057	4.96887	0.225724	0.0498784	5.58042
GOTERM_MF_DIRECT	GO:0019901~protein kinase binding	6	10.7143	0.00637855	P68104, P0DP24, P08238, P26038, F5GZ78, P40763	54	376	16881	4.98848	0.735784	0.0614136	7.75475
KEGG_PATHWAY	hsa01130:Biosynthesis of antibiotics	6	10.7143	0.00650343	P11413, P00338, P53396, P07195, P08559, Q16836	40	212	6879	4.86722	0.647937	0.0191467	7.5761
GOTERM_BP_DIRECT	GO:0045893~positive regulation of transcription, DNA-templated	7	12.5	0.00656551	P12931, E9PJF0, P28482, P06213, Q9Y463, P24941, P40763	56	515	16792	4.07573	0.996347	0.106175	9.69248
BIOCARTA	h_sppaPathway:Aspirin Blocks Signaling Pathway Involved in Platelet Activation	4	7.14286	0.00662914	P12931, P05556, E9PJF0, P28482	32	21	1625	9.67262	0.592581	0.0621232	7.50141
BIOCARTA	h_insulinPathway:Insulin Signaling Pathway	4	7.14286	0.00662914	E9PJF0, Q06124, P06213, P29353	32	21	1625	9.67262	0.592581	0.0621232	7.50141
BIOCARTA	h_il6Pathway:IL 6 signaling pathway	4	7.14286	0.00662914	E9PJF0, Q06124, P29353, P40763	32	21	1625	9.67262	0.592581	0.0621232	7.50141
BIOCARTA	h_sam68Pathway:Regulation of Splicing through Sam68	3	5.35714	0.00697101	P12931, E9PJF0, P28482	32	7	1625	21.7634	0.61108	0.0610179	7.87394
BIOCARTA	h_pelp1Pathway:Pelp1 Modulation of Estrogen Receptor Activity	3	5.35714	0.00697101	P12931, E9PJF0, P28482	32	7	1625	21.7634	0.61108	0.0610179	7.87394
KEGG_PATHWAY	hsa04261:Adrenergic signaling in cardiomyocytes	5	8.92857	0.00740179	P0DP24, E9PJF0, P28482, P53778, Q16539	40	138	6879	6.23098	0.69538	0.0213807	8.5802
GOTERM_MF_DIRECT	GO:0030971~receptor tyrosine kinase binding	3	5.35714	0.00804347	Q06124, O00459, P16333	54	43	16881	21.8101	0.81359	0.0735126	9.68567
UP_SEQ_FEATURE	sequence variant	44	78.5714	0.00804727	P07355, P00367, Q01082, P12931, Q14289, Q8WWW8, P53778, P18433, Q9H422, K7EK35, P42680, H0Y3C5, P0DP24, E9PJF0, Q06124, P53396, P06241, H0YAR3, P06213, O60496, P08559, P49840, P29353, P07948, Q86YV5, A0A087WVF7, P00338, P16284, P24941, P07195, P07108, Q92835, P28906, P08238, P11413, Q07912, Q16539, Q9Y463, Q5SQL3, P16333, O00459, Q16836, P40763, Q9NUJ1	56	12443	20063	1.26688	0.834999	0.120762	9.79411
BIOCARTA	h_her2Pathway:Role of ERBB2 in Signal Transduction and Oncology	4	7.14286	0.00860188	E9PJF0, P28482, P29353, P40763	32	23	1625	8.83152	0.688476	0.0702991	9.6322
GOTERM_BP_DIRECT	GO:0045429~positive regulation of nitric oxide biosynthetic process	3	5.35714	0.00872811	P08238, Q14289, P06213	56	43	16792	20.9203	0.999429	0.136232	12.6876
GOTERM_CC_DIRECT	GO:0034666~integrin alpha2-beta1 complex	2	3.57143	0.00886355	P05556, P07948	55	3	18224	220.897	0.793167	0.0937954	10.3588
BIOCARTA	h_stat3Pathway:Stat3 Signaling Pathway	3	5.35714	0.00918455	E9PJF0, P28482, P40763	32	8	1625	19.043	0.712244	0.0706531	10.2529
BIOCARTA	h_hbxPathway:Calcium Signaling by HBx of Hepatitis B virus	3	5.35714	0.00918455	P12931, Q14289, P29353	32	8	1625	19.043	0.712244	0.0706531	10.2529
INTERPRO	IPR014352:FERM/acyl-CoA-binding protein, 3-helical bundle	3	5.35714	0.00930936	Q14289, P26038, P07108	55	50	18559	20.2462	0.784304	0.0914159	10.7217
GOTERM_BP_DIRECT	GO:0030838~positive regulation of actin filament polymerization	3	5.35714	0.00952916	H0Y3C5, Q14289, P16333	56	45	16792	19.9905	0.999714	0.145194	13.7733
BIOCARTA	h_tpoPathway:TPO Signaling Pathway	4	7.14286	0.00970452	E9PJF0, K7EK35, P29353, P40763	32	24	1625	8.46354	0.731931	0.0705287	10.8035
BIOCARTA	h_cxcr4Pathway:CXCR4 Signaling Pathway	4	7.14286	0.00970452	E9PJF0, Q14289, P28482, F5GZ78	32	24	1625	8.46354	0.731931	0.0705287	10.8035
GOTERM_BP_DIRECT	GO:0031281~positive regulation of cyclase activity	2	3.57143	0.00979454	E9PJF0, Q16539	56	3	16792	199.905	0.999772	0.146345	14.1302
GOTERM_BP_DIRECT	GO:0000189~MAPK import into nucleus	2	3.57143	0.00979454	E9PJF0, P28482	56	3	16792	199.905	0.999772	0.146345	14.1302
GOTERM_BP_DIRECT	GO:0072011~glomerular endothelium development	2	3.57143	0.00979454	P28906, P16284	56	3	16792	199.905	0.999772	0.146345	14.1302
GOTERM_BP_DIRECT	GO:0061308~cardiac neural crest cell development involved in heart development	2	3.57143	0.00979454	E9PJF0, P28482	56	3	16792	199.905	0.999772	0.146345	14.1302
GOTERM_BP_DIRECT	GO:0030900~forebrain development	3	5.35714	0.00994154	P12931, P06241, Q9NRY4	56	46	16792	19.5559	0.999799	0.145843	14.3272
GOTERM_MF_DIRECT	GO:0097110~scaffold protein binding	3	5.35714	0.00994778	P12931, E9PJF0, P08670	54	48	16881	19.5382	0.875007	0.0864462	11.8486
GOTERM_BP_DIRECT	GO:0010628~positive regulation of gene expression	5	8.92857	0.0105972	P28906, P08670, P26038, Q16539, P40763	56	262	16792	5.72246	0.999886	0.152137	15.2012
UP_KEYWORDS	Palmitate	5	8.92857	0.0109512	H0Y3C5, P16284, P06241, Q9NWQ8, P07948	56	324	20581	5.67157	0.785968	0.0622151	12.184
INTERPRO	IPR008352:Mitogen-activated protein (MAP) kinase, p38	2	3.57143	0.0115888	P53778, Q16539	55	4	18559	168.718	0.852165	0.106359	13.1809
BIOCARTA	h_ephA4Pathway:Eph Kinases and ephrins support platelet aggregation	3	5.35714	0.0116689	P05556, P06241, P07948	32	9	1625	16.9271	0.794964	0.0800155	12.856
SMART	SM00194:PTPc	3	5.35714	0.0118048	P23469, Q06124, P18433	46	37	10057	17.7268	0.385458	0.0779411	10.3523
GOTERM_CC_DIRECT	GO:0030027~lamellipodium	4	7.14286	0.0118764	P05556, Q14289, F5GZ78, O00401	55	160	18224	8.28364	0.879331	0.116968	13.649
GOTERM_BP_DIRECT	GO:0042542~response to hydrogen peroxide	3	5.35714	0.0121198	P12931, Q14289, P00338	56	51	16792	17.6387	0.999969	0.169328	17.1985
BIOCARTA	h_tffPathway:Trefoil Factors Initiate Mucosal Healing	4	7.14286	0.0121485	P05556, E9PJF0, P28482, P29353	32	26	1625	7.8125	0.807968	0.0791928	13.3504
KEGG_PATHWAY	hsa04151:PI3K-Akt signaling pathway	7	12.5	0.0122216	P08238, P05556, E9PJF0, P28482, P06213, O00459, P24941	40	345	6879	3.48935	0.860195	0.034524	13.7986
GOTERM_BP_DIRECT	GO:0007166~cell surface receptor signaling pathway	5	8.92857	0.0123298	Q14289, Q07912, Q16539, Q99704, O60496	56	274	16792	5.47185	0.999974	0.169264	17.4705
GOTERM_MF_DIRECT	GO:0051425~PTB domain binding	2	3.57143	0.0125006	Q92835, P06213	54	4	16881	156.306	0.926943	0.103289	14.6732
GOTERM_MF_DIRECT	GO:0070851~growth factor receptor binding	2	3.57143	0.0125006	P12931, P06241	54	4	16881	156.306	0.926943	0.103289	14.6732
GOTERM_BP_DIRECT	GO:0070849~response to epidermal growth factor	2	3.57143	0.0130384	E9PJF0, P28482	56	4	16792	149.929	0.999986	0.175344	18.3822
GOTERM_BP_DIRECT	GO:0061052~negative regulation of cell growth involved in cardiac muscle cell development	2	3.57143	0.0130384	P11413, P49840	56	4	16792	149.929	0.999986	0.175344	18.3822
GOTERM_BP_DIRECT	GO:0038127~ERBB signaling pathway	2	3.57143	0.0130384	Q06124, P28482	56	4	16792	149.929	0.999986	0.175344	18.3822
GOTERM_BP_DIRECT	GO:0090170~regulation of Golgi inheritance	2	3.57143	0.0130384	E9PJF0, P28482	56	4	16792	149.929	0.999986	0.175344	18.3822
GOTERM_BP_DIRECT	GO:0045727~positive regulation of translation	3	5.35714	0.0130444	E9PJF0, Q14289, P28482	56	53	16792	16.973	0.999986	0.172718	18.3899
GOTERM_BP_DIRECT	GO:0045087~innate immune response	6	10.7143	0.0131026	P42680, P12931, Q14289, P06241, Q07912, P07948	56	430	16792	4.18405	0.999987	0.170794	18.4643
BIOCARTA	h_egfPathway:EGF Signaling Pathway	4	7.14286	0.0134919	E9PJF0, K7EK35, P29353, P40763	32	27	1625	7.52315	0.840195	0.0836197	14.7218
GOTERM_BP_DIRECT	GO:0050853~B cell receptor signaling pathway	3	5.35714	0.013518	P42680, P28482, P07948	56	54	16792	16.6587	0.999991	0.17312	18.9938
UP_SEQ_FEATURE	binding site:NAD or substrate	2	3.57143	0.0136332	P00338, P07195	56	5	20063	143.307	0.953165	0.184599	16.0642
BIOCARTA	h_SARSpathway:SARS Coronavirus Protease	3	5.35714	0.0144137	P00338, Q16539, P07195	32	10	1625	15.2344	0.859143	0.0852381	15.6514
INTERPRO	IPR018177:L-lactate dehydrogenase, active site	2	3.57143	0.0144653	P00338, P07195	55	5	18559	134.975	0.908337	0.124323	16.1956
INTERPRO	IPR011304:L-lactate dehydrogenase	2	3.57143	0.0144653	P00338, P07195	55	5	18559	134.975	0.908337	0.124323	16.1956
INTERPRO	IPR003595:Protein-tyrosine phosphatase, catalytic	3	5.35714	0.0144891	P23469, Q06124, P18433	55	63	18559	16.0684	0.908699	0.118366	16.2201
BIOCARTA	h_pdgfPathway:PDGF Signaling Pathway	4	7.14286	0.0149173	E9PJF0, K7EK35, P29353, P40763	32	28	1625	7.25446	0.868534	0.0844384	16.1553
PIR_SUPERFAMILY	PIRSF002006:receptor tyrosine-protein phosphatase, alpha/epsilon types	2	3.57143	0.0153119	P23469, P18433	14	2	1692	120.857	0.181756	0.181756	9.71135
UP_KEYWORDS	Myristate	4	7.14286	0.0153163	H0Y3C5, P12931, P06241, P07948	56	195	20581	7.53883	0.884776	0.082805	16.6495
GOTERM_MF_DIRECT	GO:0004459~L-lactate dehydrogenase activity	2	3.57143	0.0156017	P00338, P07195	54	5	16881	125.044	0.962021	0.122633	17.9924
KEGG_PATHWAY	hsa05020:Prion diseases	3	5.35714	0.0156731	E9PJF0, P28482, P06241	40	34	6879	15.1743	0.920146	0.0433743	17.366
GOTERM_MF_DIRECT	GO:0003725~double-stranded RNA binding	3	5.35714	0.0157257	P08238, P08670, P26038	54	61	16881	15.3743	0.963004	0.119095	18.1226
GOTERM_CC_DIRECT	GO:0005884~actin filament	3	5.35714	0.0159107	H0Y3C5, P12931, P06241	55	65	18224	15.2929	0.941507	0.145906	17.8811
GOTERM_CC_DIRECT	GO:0005759~mitochondrial matrix	5	8.92857	0.0159262	P00367, P08559, Q16836, P29353, Q9NUJ1	55	327	18224	5.06644	0.941669	0.138913	17.8969
GOTERM_MF_DIRECT	GO:0046934~phosphatidylinositol-4,5-bisphosphate 3-kinase activity	3	5.35714	0.0162176	Q06124, P06241, O00459	54	62	16881	15.1263	0.966657	0.118349	18.6372
GOTERM_MF_DIRECT	GO:0050839~cell adhesion molecule binding	3	5.35714	0.0162176	P05556, P26038, Q06124	54	62	16881	15.1263	0.966657	0.118349	18.6372
GOTERM_BP_DIRECT	GO:0071801~regulation of podosome assembly	2	3.57143	0.0162718	H0Y3C5, P12931	56	5	16792	119.943	0.999999	0.20184	22.4239
GOTERM_BP_DIRECT	GO:0006089~lactate metabolic process	2	3.57143	0.0162718	P00338, P07195	56	5	16792	119.943	0.999999	0.20184	22.4239
GOTERM_BP_DIRECT	GO:0072584~caveolin-mediated endocytosis	2	3.57143	0.0162718	E9PJF0, P28482	56	5	16792	119.943	0.999999	0.20184	22.4239
GOTERM_BP_DIRECT	GO:0036035~osteoclast development	2	3.57143	0.0162718	P07355, P12931	56	5	16792	119.943	0.999999	0.20184	22.4239
KEGG_PATHWAY	hsa05164:Influenza A	5	8.92857	0.0163242	E9PJF0, P28482, P53778, Q16539, O00459	40	174	6879	4.94181	0.928168	0.0443886	18.0236
GOTERM_MF_DIRECT	GO:0019903~protein phosphatase binding	3	5.35714	0.016716	Q16539, O00459, P40763	54	63	16881	14.8862	0.969993	0.117702	19.1557
UP_KEYWORDS	Cell membrane	16	28.5714	0.0170155	Q01082, P12931, P05556, P23469, Q14289, P26038, P16284, Q9NWQ8, P42680, H0Y3C5, Q92835, P06241, Q07912, Q9NRY4, P06213, P07948	56	3175	20581	1.85206	0.909524	0.0882692	18.3309
GOTERM_BP_DIRECT	GO:0006950~response to stress	3	5.35714	0.0170372	P08238, Q14289, P28482	56	61	16792	14.7471	1	0.207365	23.3527
GOTERM_MF_DIRECT	GO:0001948~glycoprotein binding	3	5.35714	0.0177323	P08238, P08670, P06241	54	65	16881	14.4282	0.9758	0.120432	20.2034
KEGG_PATHWAY	hsa04922:Glucagon signaling pathway	4	7.14286	0.0181695	P0DP24, P00338, P07195, P08559	40	99	6879	6.94848	0.946808	0.0485102	19.8614
GOTERM_BP_DIRECT	GO:0016477~cell migration	4	7.14286	0.0187745	P05556, P06241, Q07912, Q9NRY4	56	172	16792	6.97342	1	0.222997	25.4228
KEGG_PATHWAY	hsa05231:Choline metabolism in cancer	4	7.14286	0.0191559	E9PJF0, P28482, O00459, O00401	40	101	6879	6.81089	0.954711	0.0502705	20.8282
KEGG_PATHWAY	hsa04723:Retrograde endocannabinoid signaling	4	7.14286	0.0191559	E9PJF0, P28482, P53778, Q16539	40	101	6879	6.81089	0.954711	0.0502705	20.8282
UP_KEYWORDS	Oxidoreductase	6	10.7143	0.0193583	P00367, P11413, P00338, P07195, P08559, Q16836	56	582	20581	3.78884	0.935219	0.0963929	20.5982
GOTERM_BP_DIRECT	GO:0060440~trachea formation	2	3.57143	0.0194949	E9PJF0, P28482	56	6	16792	99.9524	1	0.227448	26.2657
GOTERM_BP_DIRECT	GO:0070374~positive regulation of ERK1 and ERK2 cascade	4	7.14286	0.0196453	P12931, E9PJF0, Q14289, Q06124	56	175	16792	6.85388	1	0.225956	26.4406
INTERPRO	IPR001217:STAT transcription factor, core	2	3.57143	0.0201938	K7EK35, P40763	55	7	18559	96.4104	0.964764	0.154041	21.915
INTERPRO	IPR012345:STAT transcription factor, DNA-binding, subdomain	2	3.57143	0.0201938	K7EK35, P40763	55	7	18559	96.4104	0.964764	0.154041	21.915
INTERPRO	IPR015988:STAT transcription factor, coiled coil	2	3.57143	0.0201938	K7EK35, P40763	55	7	18559	96.4104	0.964764	0.154041	21.915
INTERPRO	IPR013799:STAT transcription factor, protein interaction	2	3.57143	0.0201938	K7EK35, P40763	55	7	18559	96.4104	0.964764	0.154041	21.915
INTERPRO	IPR013801:STAT transcription factor, DNA-binding	2	3.57143	0.0201938	K7EK35, P40763	55	7	18559	96.4104	0.964764	0.154041	21.915
INTERPRO	IPR013800:STAT transcription factor, all-alpha	2	3.57143	0.0201938	K7EK35, P40763	55	7	18559	96.4104	0.964764	0.154041	21.915
GOTERM_BP_DIRECT	GO:0006006~glucose metabolic process	3	5.35714	0.0203292	P11413, Q16539, P08559	56	67	16792	13.4264	1	0.229857	27.2308
INTERPRO	IPR016130:Protein-tyrosine phosphatase, active site	3	5.35714	0.0206427	P23469, Q06124, P18433	55	76	18559	13.3199	0.967315	0.150321	22.3477
KEGG_PATHWAY	hsa00620:Pyruvate metabolism	3	5.35714	0.0213322	P00338, P07195, P08559	40	40	6879	12.8981	0.968257	0.0549891	22.9235
KEGG_PATHWAY	hsa05219:Bladder cancer	3	5.35714	0.0223468	P12931, E9PJF0, P28482	40	41	6879	12.5835	0.973111	0.0566552	23.8828
GOTERM_BP_DIRECT	GO:0030335~positive regulation of cell migration	4	7.14286	0.0223905	Q14289, P28482, P06213, P07948	56	184	16792	6.51863	1	0.247028	29.5647
GOTERM_BP_DIRECT	GO:0006101~citrate metabolic process	2	3.57143	0.0227075	P53396, K7EK35	56	7	16792	85.6735	1	0.246948	29.9175
GOTERM_BP_DIRECT	GO:0006900~membrane budding	2	3.57143	0.0227075	P07355, O00401	56	7	16792	85.6735	1	0.246948	29.9175
KEGG_PATHWAY	hsa04931:Insulin resistance	4	7.14286	0.0228401	Q06124, P06213, O00459, P40763	40	108	6879	6.36944	0.975197	0.0569909	24.3453
INTERPRO	IPR022383:Lactate/malate dehydrogenase, C-terminal	2	3.57143	0.0230457	P00338, P07195	55	8	18559	84.3591	0.978154	0.15954	24.6268
INTERPRO	IPR001557:L-lactate/malate dehydrogenase	2	3.57143	0.0230457	P00338, P07195	55	8	18559	84.3591	0.978154	0.15954	24.6268
INTERPRO	IPR001236:Lactate/malate dehydrogenase, N-terminal	2	3.57143	0.0230457	P00338, P07195	55	8	18559	84.3591	0.978154	0.15954	24.6268
UP_SEQ_FEATURE	active site:Phosphocysteine intermediate	3	5.35714	0.0232842	P23469, Q06124, P18433	56	86	20063	12.4977	0.994772	0.279897	25.9591
UP_SEQ_FEATURE	splice variant	30	53.5714	0.0237247	P07355, Q01082, P12931, P23469, Q14289, P18433, Q9H422, H0Y3C5, Q06124, P06241, Q9NRY4, P06213, P29353, P07948, A0A087WVF7, P05556, P00338, P16284, P07108, Q99704, F5GZ78, Q92835, P28906, P11413, Q07912, Q16539, Q9Y463, Q5SQL3, Q16836, P40763	56	7760	20063	1.38506	0.995273	0.270184	26.384
INTERPRO	IPR000387:Protein-tyrosine/Dual specificity phosphatase	3	5.35714	0.0237899	P23469, Q06124, P18433	55	82	18559	12.3452	0.98072	0.157754	25.32
UP_KEYWORDS	Alternative promoter usage	3	5.35714	0.0241708	P23469, P07108, P29353	56	90	20581	12.2506	0.967466	0.115151	25.0759
KEGG_PATHWAY	hsa04114:Oocyte meiosis	4	7.14286	0.0245297	P0DP24, E9PJF0, P28482, P24941	40	111	6879	6.1973	0.981196	0.0602006	25.9097
KEGG_PATHWAY	hsa04725:Cholinergic synapse	4	7.14286	0.0245297	E9PJF0, P28482, P06241, O00459	40	111	6879	6.1973	0.981196	0.0602006	25.9097
GOTERM_CC_DIRECT	GO:0032587~ruffle membrane	3	5.35714	0.0246059	P68104, P12931, P05556	55	82	18224	12.1224	0.987841	0.197871	26.3622
GOTERM_MF_DIRECT	GO:0030235~nitric-oxide synthase regulator activity	2	3.57143	0.0248478	P0DP24, P08238	54	8	16881	78.1528	0.994666	0.160085	27.1961
GOTERM_BP_DIRECT	GO:1900034~regulation of cellular response to heat	3	5.35714	0.0250951	P08238, E9PJF0, P28482	56	75	16792	11.9943	1	0.26607	32.521
UP_KEYWORDS	Proto-oncogene	4	7.14286	0.025227	H0Y3C5, P12931, P06241, P07948	56	236	20581	6.22912	0.972043	0.116044	26.0272
UP_KEYWORDS	Nucleus	22	39.2857	0.025584	P68104, P12931, Q14289, P53778, P24941, Q99704, Q9H422, K7EK35, H0Y3C5, E9PJF0, Q06124, P28482, P06241, Q07912, Q9NRY4, P16333, Q5SQL3, Q9Y463, Q16539, P40763, P07948, O00401	56	5244	20581	1.54184	0.973441	0.113918	26.3462
INTERPRO	IPR015955:Lactate dehydrogenase/glycoside hydrolase, family 4, C-terminal	2	3.57143	0.0258896	P00338, P07195	55	9	18559	74.9859	0.986456	0.164097	27.2446
GOTERM_BP_DIRECT	GO:0032872~regulation of stress-activated MAPK cascade	2	3.57143	0.0259099	E9PJF0, P28482	56	8	16792	74.9643	1	0.270224	33.3886
GOTERM_BP_DIRECT	GO:0006975~DNA damage induced protein phosphorylation	2	3.57143	0.0259099	E9PJF0, P53778	56	8	16792	74.9643	1	0.270224	33.3886
GOTERM_BP_DIRECT	GO:0060396~growth hormone receptor signaling pathway	2	3.57143	0.0259099	F5GZ78, P40763	56	8	16792	74.9643	1	0.270224	33.3886
KEGG_PATHWAY	hsa04919:Thyroid hormone signaling pathway	4	7.14286	0.0268856	P12931, E9PJF0, P28482, O00459	40	115	6879	5.98174	0.987229	0.0648852	28.0418
BIOCARTA	h_cell2cellPathway:Cell to Cell Adhesion Signaling	3	5.35714	0.0277972	P12931, P16284, F5GZ78	32	14	1625	10.8817	0.977758	0.14664	28.1437
BIOCARTA	h_lymPathway:Adhesion and Diapedesis of Lymphocytes	3	5.35714	0.0277972	P28906, P05556, P16284	32	14	1625	10.8817	0.977758	0.14664	28.1437
UP_KEYWORDS	Mitochondrion	8	14.2857	0.0287168	P00367, P12931, P53778, H0YAR3, P08559, Q16836, P29353, Q9NUJ1	56	1119	20581	2.62747	0.983079	0.123297	29.0922
GOTERM_CC_DIRECT	GO:0005768~endosome	4	7.14286	0.0290473	P07355, P06241, Q07912, P24941	55	225	18224	5.89059	0.994579	0.219994	30.3766
GOTERM_BP_DIRECT	GO:0042473~outer ear morphogenesis	2	3.57143	0.0291019	E9PJF0, P28482	56	9	16792	66.6349	1	0.294947	36.6879
UP_KEYWORDS	Cell cycle	6	10.7143	0.0294271	P12931, E9PJF0, P28482, P53778, P24941, O00401	56	650	20581	3.39247	0.984726	0.122498	29.7017
GOTERM_BP_DIRECT	GO:0008543~fibroblast growth factor receptor signaling pathway	3	5.35714	0.0296006	E9PJF0, Q06124, P28482	56	82	16792	10.9704	1	0.295799	37.1893
SMART	SM00964:SM00964	2	3.57143	0.0309132	K7EK35, P40763	46	7	10057	62.4658	0.724025	0.167998	25.0969
GOTERM_MF_DIRECT	GO:0051428~peptide hormone receptor binding	2	3.57143	0.0309645	Q06124, P06241	54	10	16881	62.5222	0.998559	0.190264	32.7514
GOTERM_MF_DIRECT	GO:0004716~receptor signaling protein tyrosine kinase activity	2	3.57143	0.0309645	P06213, P07948	54	10	16881	62.5222	0.998559	0.190264	32.7514
BIOCARTA	h_fmlpPathway:fMLP induced chemokine gene expression in HMC-1 cells	4	7.14286	0.0315131	P0DP24, E9PJF0, P28482, Q16539	32	37	1625	5.48986	0.986737	0.158787	31.2984
UP_KEYWORDS	Alternative initiation	3	5.35714	0.0315691	H0Y3C5, P23469, Q99704	56	104	20581	10.6015	0.98879	0.127235	31.5106
GOTERM_BP_DIRECT	GO:0009636~response to toxic substance	3	5.35714	0.0316231	E9PJF0, P28482, P07948	56	85	16792	10.5832	1	0.309248	39.1852
BIOCARTA	h_il3Pathway:IL 3 signaling pathway	3	5.35714	0.0316966	E9PJF0, K7EK35, P29353	32	15	1625	10.1562	0.987072	0.154006	31.4508
SMART	SM00404:PTPc_motif	3	5.35714	0.0321732	P23469, Q06124, P18433	46	63	10057	10.411	0.738361	0.154307	25.9884
GOTERM_MF_DIRECT	GO:0005525~GTP binding	5	8.92857	0.0322146	P68104, P00367, P08238, Q9NRY4, P06213	54	384	16881	4.07046	0.998898	0.191716	33.8377
GOTERM_BP_DIRECT	GO:0071803~positive regulation of podosome assembly	2	3.57143	0.0322836	P12931, P26038	56	10	16792	59.9714	1	0.311192	39.8241
UP_SEQ_FEATURE	domain:Tyrosine-protein phosphatase 2	2	3.57143	0.0324136	P23469, P18433	56	12	20063	59.7113	0.999356	0.335168	34.3187
UP_SEQ_FEATURE	domain:SH2 2	2	3.57143	0.0324136	Q06124, O00459	56	12	20063	59.7113	0.999356	0.335168	34.3187
UP_SEQ_FEATURE	domain:Tyrosine-protein phosphatase 1	2	3.57143	0.0324136	P23469, P18433	56	12	20063	59.7113	0.999356	0.335168	34.3187
UP_SEQ_FEATURE	domain:SH2 1	2	3.57143	0.0324136	Q06124, O00459	56	12	20063	59.7113	0.999356	0.335168	34.3187
UP_KEYWORDS	Cell junction	6	10.7143	0.0338339	H0Y3C5, P05556, Q14289, P16284, Q07912, F5GZ78	56	675	20581	3.26683	0.991923	0.132142	33.3767
GOTERM_MF_DIRECT	GO:0043560~insulin receptor substrate binding	2	3.57143	0.0340087	Q06124, P06213	54	11	16881	56.8384	0.999251	0.195945	35.3683
INTERPRO	IPR002404:Insulin receptor substrate-1, PTB	2	3.57143	0.0343723	Q99704, O60496	55	12	18559	56.2394	0.996773	0.205028	34.5657
KEGG_PATHWAY	hsa05213:Endometrial cancer	3	5.35714	0.0347573	E9PJF0, P28482, O00459	40	52	6879	9.92163	0.996518	0.082185	34.7639
UP_SEQ_FEATURE	domain:IRS-type PTB	2	3.57143	0.0350677	Q99704, O60496	56	13	20063	55.1181	0.999651	0.342279	36.5803
GOTERM_BP_DIRECT	GO:0007160~cell-matrix adhesion	3	5.35714	0.0351117	P28906, P05556, F5GZ78	56	90	16792	9.99524	1	0.330147	42.489
KEGG_PATHWAY	hsa04728:Dopaminergic synapse	4	7.14286	0.0353551	P0DP24, P53778, Q16539, P49840	40	128	6879	5.37422	0.996846	0.0823679	35.2501
GOTERM_BP_DIRECT	GO:0051279~regulation of release of sequestered calcium ion into cytosol	2	3.57143	0.0354552	Q14289, P07948	56	11	16792	54.5195	1	0.3293	42.805
GOTERM_BP_DIRECT	GO:0019674~NAD metabolic process	2	3.57143	0.0354552	P00338, P07195	56	11	16792	54.5195	1	0.3293	42.805
GOTERM_BP_DIRECT	GO:0033628~regulation of cell adhesion mediated by integrin	2	3.57143	0.0354552	Q06124, P07948	56	11	16792	54.5195	1	0.3293	42.805
GOTERM_CC_DIRECT	GO:0042470~melanosome	3	5.35714	0.0361104	P07355, P08238, P05556	55	101	18224	9.84194	0.998511	0.256138	36.3484
BIOCARTA	h_il2rbPathway:IL-2 Receptor Beta Chain in T cell Activation	4	7.14286	0.0361268	E9PJF0, P28482, K7EK35, P29353	32	39	1625	5.20833	0.993039	0.168046	35.0388
GOTERM_BP_DIRECT	GO:0007179~transforming growth factor beta receptor signaling pathway	3	5.35714	0.0365474	P12931, P05556, F5GZ78	56	92	16792	9.77795	1	0.334148	43.7992
GOTERM_BP_DIRECT	GO:0006915~apoptotic process	6	10.7143	0.0375825	Q92835, E9PJF0, Q14289, P28482, Q16539, Q9H422	56	567	16792	3.17309	1	0.338426	44.7265
GOTERM_BP_DIRECT	GO:0046854~phosphatidylinositol phosphorylation	3	5.35714	0.0380054	Q06124, P06241, O00459	56	94	16792	9.56991	1	0.338106	45.1012
GOTERM_BP_DIRECT	GO:0006107~oxaloacetate metabolic process	2	3.57143	0.0386165	P53396, K7EK35	56	12	16792	49.9762	1	0.339157	45.6385
GOTERM_BP_DIRECT	GO:0050777~negative regulation of immune response	2	3.57143	0.0386165	Q92835, P07948	56	12	16792	49.9762	1	0.339157	45.6385
GOTERM_BP_DIRECT	GO:0071498~cellular response to fluid shear stress	2	3.57143	0.0386165	P12931, Q14289	56	12	16792	49.9762	1	0.339157	45.6385
UP_KEYWORDS	Cell adhesion	5	8.92857	0.0389441	P28906, P12931, P05556, P16284, F5GZ78	56	479	20581	3.8363	0.996156	0.146911	37.4178
GOTERM_MF_DIRECT	GO:0004725~protein tyrosine phosphatase activity	3	5.35714	0.0393715	P23469, Q06124, P18433	54	100	16881	9.37833	0.999765	0.217867	39.7513
KEGG_PATHWAY	hsa05223:Non-small cell lung cancer	3	5.35714	0.0398012	E9PJF0, P28482, O00459	40	56	6879	9.21295	0.998494	0.0911402	38.7631
GOTERM_MF_DIRECT	GO:0070403~NAD+ binding	2	3.57143	0.040069	P00367, Q16836	54	13	16881	48.094	0.999798	0.215749	40.3009
GOTERM_MF_DIRECT	GO:0001784~phosphotyrosine binding	2	3.57143	0.040069	E9PJF0, P28482	54	13	16881	48.094	0.999798	0.215749	40.3009
BIOCARTA	h_uCalpainPathway:uCalpain and friends in Cell spread	3	5.35714	0.0400966	P12931, P05556, F5GZ78	32	17	1625	8.9614	0.996012	0.17906	38.1071
BIOCARTA	h_hcmvPathway:Human Cytomegalovirus and Map Kinase Pathways	3	5.35714	0.0400966	E9PJF0, P28482, Q16539	32	17	1625	8.9614	0.996012	0.17906	38.1071
BIOCARTA	h_ccr5Pathway:Pertussis toxin-insensitive CCR5 Signaling in Macrophage	3	5.35714	0.0400966	P0DP24, Q14289, Q16539	32	17	1625	8.9614	0.996012	0.17906	38.1071
BIOCARTA	h_il7Pathway:IL-7 Signal Transduction	3	5.35714	0.0400966	Q14289, P06241, K7EK35	32	17	1625	8.9614	0.996012	0.17906	38.1071
GOTERM_BP_DIRECT	GO:0035335~peptidyl-tyrosine dephosphorylation	3	5.35714	0.0417464	P23469, Q06124, P18433	56	99	16792	9.08658	1	0.357937	48.314
GOTERM_BP_DIRECT	GO:0060425~lung morphogenesis	2	3.57143	0.0417676	E9PJF0, P28482	56	13	16792	46.1319	1	0.354647	48.3317
GOTERM_BP_DIRECT	GO:2000573~positive regulation of DNA biosynthetic process	2	3.57143	0.0417676	P12931, Q14289	56	13	16792	46.1319	1	0.354647	48.3317
GOTERM_BP_DIRECT	GO:0032516~positive regulation of phosphoprotein phosphatase activity	2	3.57143	0.0417676	P0DP24, P08238	56	13	16792	46.1319	1	0.354647	48.3317
GOTERM_BP_DIRECT	GO:0019752~carboxylic acid metabolic process	2	3.57143	0.0417676	P00338, P07195	56	13	16792	46.1319	1	0.354647	48.3317
GOTERM_BP_DIRECT	GO:2001275~positive regulation of glucose import in response to insulin stimulus	2	3.57143	0.0417676	Q06124, O00459	56	13	16792	46.1319	1	0.354647	48.3317
KEGG_PATHWAY	hsa04150:mTOR signaling pathway	3	5.35714	0.0424216	E9PJF0, P28482, O00459	40	58	6879	8.89526	0.999027	0.0956298	40.7508
GOTERM_BP_DIRECT	GO:0016310~phosphorylation	3	5.35714	0.0425107	E9PJF0, Q07912, P40763	56	100	16792	8.99571	1	0.356358	48.9483
UP_SEQ_FEATURE	transit peptide:Mitochondrion	5	8.92857	0.0429262	P00367, H0YAR3, P08559, Q16836, Q9NUJ1	56	482	20063	3.71647	0.999944	0.386886	42.8629
GOTERM_BP_DIRECT	GO:0042593~glucose homeostasis	3	5.35714	0.0432802	Q06124, P06213, P40763	56	101	16792	8.90665	1	0.358206	49.5797
GOTERM_BP_DIRECT	GO:0016337~single organismal cell-cell adhesion	3	5.35714	0.0432802	P28906, P12931, P29353	56	101	16792	8.90665	1	0.358206	49.5797
BIOCARTA	h_erk5Pathway:Role of Erk5 in Neuronal Survival	3	5.35714	0.0445801	E9PJF0, P28482, P29353	32	18	1625	8.46354	0.997881	0.191275	41.4127
GOTERM_BP_DIRECT	GO:0002576~platelet degranulation	3	5.35714	0.044835	P0DP24, P16284, P07948	56	103	16792	8.7337	1	0.3652	50.833
GOTERM_BP_DIRECT	GO:0030889~negative regulation of B cell proliferation	2	3.57143	0.0449086	Q92835, P07948	56	14	16792	42.8367	1	0.362357	50.8917
KEGG_PATHWAY	hsa04730:Long-term depression	3	5.35714	0.0451055	E9PJF0, P28482, P07948	40	60	6879	8.59875	0.999379	0.100122	42.7252
GOTERM_MF_DIRECT	GO:0005159~insulin-like growth factor receptor binding	2	3.57143	0.046092	P06213, P29353	54	15	16881	41.6815	0.999945	0.238635	44.8576
GOTERM_BP_DIRECT	GO:0002223~stimulatory C-type lectin receptor signaling pathway	3	5.35714	0.0464103	P12931, P06241, P07948	56	105	16792	8.56735	1	0.368778	52.0732
GOTERM_MF_DIRECT	GO:0005200~structural constituent of cytoskeleton	3	5.35714	0.0467522	Q01082, P08670, P26038	54	110	16881	8.52576	0.999953	0.235983	45.3371
GOTERM_BP_DIRECT	GO:0048015~phosphatidylinositol-mediated signaling	3	5.35714	0.0472056	Q06124, P06241, O00459	56	106	16792	8.48652	1	0.370554	52.6881
INTERPRO	IPR011992:EF-hand-like domain	4	7.14286	0.0475581	A0A087WVF7, P0DP24, K7EK35, P40763	55	279	18559	4.8378	0.999662	0.264606	44.614
KEGG_PATHWAY	hsa05210:Colorectal cancer	3	5.35714	0.0478511	E9PJF0, P28482, O00459	40	62	6879	8.32137	0.999608	0.104613	44.6823
GOTERM_BP_DIRECT	GO:0035024~negative regulation of Rho protein signal transduction	2	3.57143	0.0480395	P05556, Q9NRY4	56	15	16792	39.981	1	0.372531	53.3249
SMART	SM00310:PTBI	2	3.57143	0.0481564	Q99704, O60496	46	11	10057	39.751	0.867813	0.201354	36.504
KEGG_PATHWAY	hsa04630:Jak-STAT signaling pathway	4	7.14286	0.0482778	Q06124, O00459, K7EK35, P40763	40	145	6879	4.74414	0.999636	0.10413	44.9809
BIOCARTA	h_tcrPathway:T Cell Receptor Signaling Pathway	4	7.14286	0.0491083	P0DP24, E9PJF0, P06241, P29353	32	44	1625	4.61648	0.998884	0.202759	44.5866
BIOCARTA	h_epoPathway:EPO Signaling Pathway	3	5.35714	0.0492417	E9PJF0, K7EK35, P29353	32	19	1625	8.01809	0.998905	0.197401	44.6777
UP_KEYWORDS	Protein phosphatase	3	5.35714	0.0492764	P23469, Q06124, P18433	56	133	20581	8.28988	0.999154	0.178409	44.9113
UP_SEQ_FEATURE	binding site:Substrate	4	7.14286	0.0495365	P00367, P11413, P00338, P07195	56	301	20063	4.76103	0.999988	0.416964	47.6979
GOTERM_CC_DIRECT	GO:0005770~late endosome	3	5.35714	0.0507546	P12931, E9PJF0, P28482	55	122	18224	8.14784	0.999901	0.33025	47.2597
UP_SEQ_FEATURE	domain:CRIB	2	3.57143	0.0508428	Q07912, O00401	56	19	20063	37.7124	0.999991	0.410762	48.6075
GOTERM_BP_DIRECT	GO:0048011~neurotrophin TRK receptor signaling pathway	2	3.57143	0.0511603	P12931, Q06124	56	16	16792	37.4821	1	0.388404	55.6378
GOTERM_BP_DIRECT	GO:1904355~positive regulation of telomere capping	2	3.57143	0.0511603	E9PJF0, P28482	56	16	16792	37.4821	1	0.388404	55.6378
GOTERM_CC_DIRECT	GO:0005938~cell cortex	3	5.35714	0.0514978	P07355, Q14289, F5GZ78	55	123	18224	8.0816	0.999914	0.322892	47.7647
GOTERM_MF_DIRECT	GO:0005001~transmembrane receptor protein tyrosine phosphatase activity	2	3.57143	0.0520779	P23469, P18433	54	17	16881	36.7778	0.999985	0.25379	49.0669
GOTERM_MF_DIRECT	GO:0016616~oxidoreductase activity, acting on the CH-OH group of donors, NAD or NADP as acceptor	2	3.57143	0.0520779	P00338, P07195	54	17	16881	36.7778	0.999985	0.25379	49.0669
UP_KEYWORDS	Glucose metabolism	2	3.57143	0.0521354	P11413, P08559	56	20	20581	36.7518	0.999445	0.183393	46.8346
KEGG_PATHWAY	hsa04921:Oxytocin signaling pathway	4	7.14286	0.0524674	P0DP24, P12931, E9PJF0, P28482	40	150	6879	4.586	0.99982	0.111414	47.8353
KEGG_PATHWAY	hsa04720:Long-term potentiation	3	5.35714	0.0535208	P0DP24, E9PJF0, P28482	40	66	6879	7.81705	0.999849	0.112132	48.5312
BIOCARTA	h_nkcellsPathway:Ras-Independent pathway in NK cell-mediated cytotoxicity	3	5.35714	0.0540735	P05556, E9PJF0, Q14289	32	20	1625	7.61719	0.99945	0.209051	47.8854
GOTERM_BP_DIRECT	GO:2000811~negative regulation of anoikis	2	3.57143	0.0542711	P12931, P05556	56	17	16792	35.2773	1	0.403544	57.8361
GOTERM_BP_DIRECT	GO:0042523~positive regulation of tyrosine phosphorylation of Stat5 protein	2	3.57143	0.0542711	P16284, P06241	56	17	16792	35.2773	1	0.403544	57.8361
GOTERM_CC_DIRECT	GO:0043235~receptor complex	3	5.35714	0.0545096	P05556, P18433, P06213	55	127	18224	7.82706	0.999951	0.327562	49.7659
GOTERM_BP_DIRECT	GO:0045766~positive regulation of angiogenesis	3	5.35714	0.0545846	P28906, Q14289, Q5SQL3	56	115	16792	7.82236	1	0.40204	58.0519
UP_KEYWORDS	Apoptosis	5	8.92857	0.0547753	Q92835, E9PJF0, P28482, Q16539, Q9H422	56	536	20581	3.42834	0.999624	0.18742	48.5556
UP_KEYWORDS	Transit peptide	5	8.92857	0.0547753	P00367, H0YAR3, P08559, Q16836, Q9NUJ1	56	536	20581	3.42834	0.999624	0.18742	48.5556
KEGG_PATHWAY	hsa00010:Glycolysis / Gluconeogenesis	3	5.35714	0.0549743	P00338, P07195, P08559	40	67	6879	7.70037	0.999882	0.113634	49.4775
GOTERM_MF_DIRECT	GO:0043274~phospholipase binding	2	3.57143	0.055057	P0DP24, Q06124	54	18	16881	34.7346	0.999992	0.260684	51.0497
GOTERM_CC_DIRECT	GO:0031982~vesicle	3	5.35714	0.0552722	P07355, P0DP24, P26038	55	128	18224	7.76591	0.999957	0.32096	50.2613
GOTERM_BP_DIRECT	GO:0006461~protein complex assembly	3	5.35714	0.0554283	E9PJF0, Q14289, O00401	56	116	16792	7.75493	1	0.403606	58.6276
UP_SEQ_FEATURE	domain:SH3 3	2	3.57143	0.0560447	A0A087WVF7, P16333	56	21	20063	34.1207	0.999997	0.42834	52.0872
GOTERM_MF_DIRECT	GO:0003779~actin binding	4	7.14286	0.056676	Q01082, P05556, P26038, O00401	54	278	16881	4.498	0.999995	0.261694	52.0972
GOTERM_BP_DIRECT	GO:0031668~cellular response to extracellular stimulus	2	3.57143	0.0573718	Q9NRY4, P07948	56	18	16792	33.3175	1	0.411327	59.9257
GOTERM_BP_DIRECT	GO:0060324~face development	2	3.57143	0.0573718	E9PJF0, P28482	56	18	16792	33.3175	1	0.411327	59.9257
GOTERM_BP_DIRECT	GO:0036120~cellular response to platelet-derived growth factor stimulus	2	3.57143	0.0573718	P12931, P06241	56	18	16792	33.3175	1	0.411327	59.9257
GOTERM_MF_DIRECT	GO:0043548~phosphatidylinositol 3-kinase binding	2	3.57143	0.058027	P06241, P06213	54	19	16881	32.9064	0.999996	0.261598	52.9554
GOTERM_BP_DIRECT	GO:0007417~central nervous system development	3	5.35714	0.0588493	P12931, P06241, P07948	56	120	16792	7.49643	1	0.416252	60.8868
GOTERM_BP_DIRECT	GO:0098609~cell-cell adhesion	4	7.14286	0.0590628	P07355, Q01082, P08238, P00338	56	271	16792	4.42594	1	0.414172	61.0239
BIOCARTA	h_igf1Pathway:IGF-1 Signaling Pathway	3	5.35714	0.0590676	E9PJF0, Q06124, P29353	32	21	1625	7.25446	0.999731	0.220475	51.0214
KEGG_PATHWAY	hsa04022:cGMP-PKG signaling pathway	4	7.14286	0.059528	P0DP24, E9PJF0, P28482, P06213	40	158	6879	4.3538	0.999946	0.121208	52.34
GOTERM_CC_DIRECT	GO:0005654~nucleoplasm	14	25	0.0597138	P0DP24, P08238, Q14289, E9PJF0, P28482, P53396, P53778, Q16539, Q5SQL3, P24941, Q16836, K7EK35, F5GZ78, P40763	55	2784	18224	1.66625	0.999982	0.33211	53.0586
UP_KEYWORDS	Phagocytosis	2	3.57143	0.059722	H0Y3C5, P16284	56	23	20581	31.9581	0.99982	0.198328	51.644
PIR_SUPERFAMILY	PIRSF000102:L-lactate/malate dehydrogenase	2	3.57143	0.0599588	P00338, P07195	14	8	1692	30.2143	0.55238	0.330956	33.5927
GOTERM_BP_DIRECT	GO:0043536~positive regulation of blood vessel endothelial cell migration	2	3.57143	0.0604626	Q16539, K7EK35	56	19	16792	31.5639	1	0.418542	61.9118
GOTERM_BP_DIRECT	GO:0051493~regulation of cytoskeleton organization	2	3.57143	0.0604626	E9PJF0, P28482	56	19	16792	31.5639	1	0.418542	61.9118
KEGG_PATHWAY	hsa05218:Melanoma	3	5.35714	0.0609262	E9PJF0, P28482, O00459	40	71	6879	7.26655	0.999957	0.122449	53.1885
GOTERM_BP_DIRECT	GO:0043066~negative regulation of apoptotic process	5	8.92857	0.0615342	H0Y3C5, P12931, Q14289, Q9H422, P40763	56	455	16792	3.29513	1	0.421063	62.5786
GOTERM_BP_DIRECT	GO:1901796~regulation of signal transduction by p53 class mediator	3	5.35714	0.0623419	Q16539, P24941, Q5SQL3	56	124	16792	7.25461	1	0.422144	63.074
GOTERM_BP_DIRECT	GO:0051726~regulation of cell cycle	3	5.35714	0.0623419	P12931, P05556, P40763	56	124	16792	7.25461	1	0.422144	63.074
GOTERM_BP_DIRECT	GO:0034614~cellular response to reactive oxygen species	2	3.57143	0.0635434	P12931, F5GZ78	56	20	16792	29.9857	1	0.425249	63.7995
GOTERM_BP_DIRECT	GO:0071375~cellular response to peptide hormone stimulus	2	3.57143	0.0635434	P12931, P06241	56	20	16792	29.9857	1	0.425249	63.7995
BIOCARTA	h_il2Pathway:IL 2 signaling pathway	3	5.35714	0.0642167	E9PJF0, K7EK35, P29353	32	22	1625	6.92472	0.999872	0.231668	54.073
GOTERM_BP_DIRECT	GO:0001934~positive regulation of protein phosphorylation	3	5.35714	0.065007	P07355, E9PJF0, P06213	56	127	16792	7.08324	1	0.42962	64.6653
GOTERM_BP_DIRECT	GO:1900182~positive regulation of protein localization to nucleus	2	3.57143	0.0666143	P12931, P06241	56	21	16792	28.5578	1	0.434607	65.5939
GOTERM_BP_DIRECT	GO:0031954~positive regulation of protein autophosphorylation	2	3.57143	0.0666143	P0DP24, P12931	56	21	16792	28.5578	1	0.434607	65.5939
BIOCARTA	h_igf1rPathway:Multiple antiapoptotic pathways from IGF-1R signaling lead to BAD phosphorylation	3	5.35714	0.0695133	E9PJF0, P28482, P29353	32	23	1625	6.62364	0.99994	0.242626	57.0298
GOTERM_BP_DIRECT	GO:0043524~negative regulation of neuron apoptotic process	3	5.35714	0.0695328	P08238, Q14289, P06241	56	132	16792	6.81494	1	0.445898	67.2217
GOTERM_BP_DIRECT	GO:0045453~bone resorption	2	3.57143	0.0696753	P12931, Q14289	56	22	16792	27.2597	1	0.443466	67.2993
GOTERM_BP_DIRECT	GO:0051000~positive regulation of nitric-oxide synthase activity	2	3.57143	0.0696753	P0DP24, Q14289	56	22	16792	27.2597	1	0.443466	67.2993
UP_KEYWORDS	Disease mutation	12	21.4286	0.0719023	P00367, P0DP24, P08670, P11413, Q06124, P00338, P06213, O00459, P07195, P08559, Q16836, P40763	56	2550	20581	1.7295	0.999971	0.229845	58.5392
GOTERM_BP_DIRECT	GO:0032733~positive regulation of interleukin-10 production	2	3.57143	0.0727265	P28906, O75995	56	23	16792	26.0745	1	0.454964	68.9204
GOTERM_CC_DIRECT	GO:0043209~myelin sheath	3	5.35714	0.0746498	P26038, P07195, P08559	55	152	18224	6.53971	0.999999	0.38764	61.4396
BIOCARTA	h_eif4Pathway:Regulation of eIF4e and p70 S6 Kinase	3	5.35714	0.0749505	E9PJF0, P28482, Q16539	32	24	1625	6.34766	0.999973	0.253347	59.883
GOTERM_BP_DIRECT	GO:0043065~positive regulation of apoptotic process	4	7.14286	0.0751573	Q92835, P12931, P05556, P00338	56	300	16792	3.9981	1	0.463201	70.1577
GOTERM_BP_DIRECT	GO:0070371~ERK1 and ERK2 cascade	2	3.57143	0.0757678	E9PJF0, P28482	56	24	16792	24.9881	1	0.462905	70.4611
GOTERM_BP_DIRECT	GO:0045648~positive regulation of erythrocyte differentiation	2	3.57143	0.0757678	Q92835, Q16539	56	24	16792	24.9881	1	0.462905	70.4611
GOTERM_BP_DIRECT	GO:0051149~positive regulation of muscle cell differentiation	2	3.57143	0.0757678	P53778, Q16539	56	24	16792	24.9881	1	0.462905	70.4611
UP_KEYWORDS	Lipoprotein	6	10.7143	0.0765917	H0Y3C5, P12931, P16284, P06241, Q9NWQ8, P07948	56	852	20581	2.58815	0.999986	0.238215	60.9446
KEGG_PATHWAY	hsa05034:Alcoholism	4	7.14286	0.0779905	P0DP24, E9PJF0, P28482, P29353	40	177	6879	3.88644	0.999998	0.153431	62.4868
GOTERM_BP_DIRECT	GO:0030878~thyroid gland development	2	3.57143	0.0787993	E9PJF0, P28482	56	25	16792	23.9886	1	0.473529	71.9256
GOTERM_BP_DIRECT	GO:0007159~leukocyte cell-cell adhesion	2	3.57143	0.0787993	P05556, P26038	56	25	16792	23.9886	1	0.473529	71.9256
UP_KEYWORDS	NAD	3	5.35714	0.0796789	P00338, P07195, Q16836	56	175	20581	6.30031	0.999991	0.241775	62.4577
BIOCARTA	h_mapkPathway:MAPKinase Signaling Pathway	5	8.92857	0.0799315	E9PJF0, P28482, P53778, Q16539, P29353	32	87	1625	2.91846	0.999987	0.262109	62.3437
UP_KEYWORDS	Isopeptide bond	7	12.5	0.0804386	P07355, P0DP24, P05556, P08670, P53396, Q5SQL3, Q9H422	56	1132	20581	2.27264	0.999992	0.238928	62.8218
GOTERM_MF_DIRECT	GO:0046983~protein dimerization activity	3	5.35714	0.0805758	P08238, P07108, P40763	54	150	16881	6.25222	1	0.340345	65.3443
BIOCARTA	h_nfatPathway:NFAT and Hypertrophy of the heart (Transcription in the broken heart)	4	7.14286	0.0809674	P0DP24, E9PJF0, P28482, Q16539	32	54	1625	3.76157	0.999989	0.259153	62.8377
GOTERM_BP_DIRECT	GO:0050999~regulation of nitric-oxide synthase activity	2	3.57143	0.0818211	P0DP24, O00401	56	26	16792	23.0659	1	0.483756	73.3176
GOTERM_BP_DIRECT	GO:0072661~protein targeting to plasma membrane	2	3.57143	0.0818211	P07355, Q01082	56	26	16792	23.0659	1	0.483756	73.3176
GOTERM_BP_DIRECT	GO:0032148~activation of protein kinase B activity	2	3.57143	0.0818211	P12931, P06213	56	26	16792	23.0659	1	0.483756	73.3176
GOTERM_BP_DIRECT	GO:0060338~regulation of type I interferon-mediated signaling pathway	2	3.57143	0.0818211	P08238, Q06124	56	26	16792	23.0659	1	0.483756	73.3176
KEGG_PATHWAY	hsa05222:Small cell lung cancer	3	5.35714	0.0833479	P05556, O00459, P24941	40	85	6879	6.06971	0.999999	0.161598	65.0357
GOTERM_BP_DIRECT	GO:0010800~positive regulation of peptidyl-threonine phosphorylation	2	3.57143	0.0848331	P0DP24, P28482	56	27	16792	22.2116	1	0.493606	74.6406
GOTERM_MF_DIRECT	GO:0019899~enzyme binding	4	7.14286	0.0867221	P12931, P06241, Q16539, P07948	54	333	16881	3.75509	1	0.355195	68.1559
GOTERM_MF_DIRECT	GO:0004712~protein serine/threonine/tyrosine kinase activity	2	3.57143	0.0872271	Q07912, Q9Y463	54	29	16881	21.5594	1	0.350433	68.3773
GOTERM_MF_DIRECT	GO:0042169~SH2 domain binding	2	3.57143	0.0872271	P12931, Q9NWQ8	54	29	16881	21.5594	1	0.350433	68.3773
GOTERM_BP_DIRECT	GO:0050690~regulation of defense response to virus by virus	2	3.57143	0.0878355	H0Y3C5, P06241	56	28	16792	21.4184	1	0.503098	75.898
KEGG_PATHWAY	hsa04540:Gap junction	3	5.35714	0.0884422	P12931, E9PJF0, P28482	40	88	6879	5.86278	1	0.169062	67.3112
GOTERM_BP_DIRECT	GO:0046627~negative regulation of insulin receptor signaling pathway	2	3.57143	0.0908281	P23469, P49840	56	29	16792	20.6798	1	0.512249	77.0932
GOTERM_BP_DIRECT	GO:0051973~positive regulation of telomerase activity	2	3.57143	0.0908281	E9PJF0, P28482	56	29	16792	20.6798	1	0.512249	77.0932
GOTERM_BP_DIRECT	GO:0048873~homeostasis of number of cells within a tissue	2	3.57143	0.0908281	Q06124, O75995	56	29	16792	20.6798	1	0.512249	77.0932
GOTERM_BP_DIRECT	GO:0048008~platelet-derived growth factor receptor signaling pathway	2	3.57143	0.0908281	P12931, Q06124	56	29	16792	20.6798	1	0.512249	77.0932
UP_SEQ_FEATURE	lipid moiety-binding region:S-palmitoyl cysteine	3	5.35714	0.0914674	P06241, Q9NWQ8, P07948	56	185	20063	5.80975	1	0.589877	70.5867
BIOCARTA	h_raccycdPathway:Influence of Ras and Rho proteins on G1 to S Transition	3	5.35714	0.0920372	E9PJF0, P28482, P24941	32	27	1625	5.64236	0.999998	0.284102	67.7595
BIOCARTA	h_edg1Pathway:Phospholipids as signalling intermediaries	3	5.35714	0.0920372	P12931, E9PJF0, P28482	32	27	1625	5.64236	0.999998	0.284102	67.7595
BIOCARTA	h_crebPathway:Transcription factor CREB and its extracellular signals	3	5.35714	0.0920372	E9PJF0, P28482, Q16539	32	27	1625	5.64236	0.999998	0.284102	67.7595
GOTERM_MF_DIRECT	GO:0005154~epidermal growth factor receptor binding	2	3.57143	0.0929596	Q07912, P29353	54	31	16881	20.1685	1	0.362998	70.7932
GOTERM_BP_DIRECT	GO:0046326~positive regulation of glucose import	2	3.57143	0.0938112	Q16539, P06213	56	30	16792	19.9905	1	0.521077	78.2292
GOTERM_BP_DIRECT	GO:0000077~DNA damage checkpoint	2	3.57143	0.0938112	Q06124, Q16539	56	30	16792	19.9905	1	0.521077	78.2292
GOTERM_BP_DIRECT	GO:0046676~negative regulation of insulin secretion	2	3.57143	0.0967846	Q06124, Q16836	56	31	16792	19.3456	1	0.529595	79.309
GOTERM_CC_DIRECT	GO:0016323~basolateral plasma membrane	3	5.35714	0.0995325	P07355, P08238, P26038	55	180	18224	5.52242	1	0.472651	72.411
GOTERM_BP_DIRECT	GO:0042220~response to cocaine	2	3.57143	0.0997484	P08238, Q14289	56	32	16792	18.7411	1	0.537821	80.3352
GOTERM_BP_DIRECT	GO:0007259~JAK-STAT cascade	2	3.57143	0.0997484	K7EK35, P40763	56	32	16792	18.7411	1	0.537821	80.3352
GOTERM_BP_DIRECT	GO:0032212~positive regulation of telomere maintenance via telomerase	2	3.57143	0.0997484	E9PJF0, P28482	56	32	16792	18.7411	1	0.537821	80.3352

## Sheet: GO analysis of Up regulated
Supplementary Table 2: GO and STRING analysis of regulated tyrosine-phosphorylated peptides between vehicle or osimertinib treated CD34+ cells measured by LC-MS.
Category	Term	Count	%	PValue	Genes	List Total	Pop Hits	Pop Total	Fold Enrichment	Bonferroni	Benjamini	FDR
GOTERM_CC_DIRECT	GO:0070062~extracellular exosome	10	55.5556	0.00036351	Q13509, P46109, P11274, H0Y4R1, P06733, Q9UBQ7, A0A0A0MS51, P58546, P15144, P98160	18	2811	18224	3.60172	0.0201544	0.0201544	0.358365
UP_SEQ_FEATURE	mutagenesis site	7	38.8889	0.00718756	Q14190, P11274, P06733, Q07912, Q9NWQ8, P15144, P98160	18	2191	20063	3.56106	0.738603	0.738603	8.54643
UP_KEYWORDS	Phosphoprotein	13	72.2222	0.0107279	Q13509, E9PNT2, H0Y4R1, A0A0G2JRG8, P06733, Q9NWQ8, P58546, P46109, O60667, P11274, Q9UBQ7, Q07912, P09429, A0A0A0MS51	18	8246	20581	1.80258	0.674285	0.674285	11.3611
UP_SEQ_FEATURE	active site:Proton donor	3	16.6667	0.0121867	P06733, Q9UBQ7, P15144	18	200	20063	16.7192	0.897782	0.680285	14.089
UP_KEYWORDS	SH3 domain	3	16.6667	0.0133241	P46109, E9PNT2, A0A0G2JRG8, Q07912	18	215	20581	15.9543	0.752172	0.502177	13.9276
INTERPRO	IPR001452:Src homology-3 domain	3	16.6667	0.014789	P46109, E9PNT2, A0A0G2JRG8, Q07912	17	218	18559	15.0235	0.71394	0.71394	14.7795
GOTERM_CC_DIRECT	GO:0005768~endosome	3	16.6667	0.0182689	P46109, Q07912, P09429	18	225	18224	13.4993	0.643891	0.403251	16.645
UP_SEQ_FEATURE	domain:Laminin EGF-like 2	2	11.1111	0.0226422	Q9NY15, P98160	18	27	20063	82.5638	0.985876	0.758275	24.6966
GOTERM_CC_DIRECT	GO:0005829~cytosol	8	44.4444	0.023221	P46109, P11274, H0Y4R1, P06733, Q9UBQ7, A0A0A0MS51, P58546, P15144	18	3315	18224	2.4433	0.731717	0.355043	20.7052
UP_KEYWORDS	Laminin EGF-like domain	2	11.1111	0.0253096	Q9NY15, P98160	18	31	20581	73.767	0.930476	0.588808	24.9215
GOTERM_CC_DIRECT	GO:0005615~extracellular space	5	27.7778	0.0325277	P06733, A0A0A0MS51, P09429, P15144, P98160	18	1347	18224	3.75815	0.843051	0.370582	27.8578
INTERPRO	IPR002049:EGF-like, laminin	2	11.1111	0.0331109	Q9NY15, P98160	17	39	18559	55.9849	0.940893	0.756881	30.3317
UP_KEYWORDS	Cell membrane	7	38.8889	0.0360125	P0C7N1, P11274, P06733, Q07912, Q9NWQ8, P09429, P15144	18	3175	20581	2.52086	0.977949	0.614649	33.6413
SMART	SM00180:EGF_Lam	2	11.1111	0.0443353	Q9NY15, P98160	14	35	10057	41.049	0.754827	0.754827	32.2658
UP_SEQ_FEATURE	domain:EGF-like 4	2	11.1111	0.0488525	Q9NY15, P98160	18	59	20063	37.7834	0.99991	0.902608	46.2224
UP_KEYWORDS	Disulfide bond	7	38.8889	0.0505564	P0C7N1, O60667, Q9NY15, A0A0A0MS51, P09429, P15144, P98160	18	3434	20581	2.33073	0.995463	0.660094	44.0144
GOTERM_MF_DIRECT	GO:0005070~SH3/SH2 adaptor activity	2	11.1111	0.0517995	P46109, Q9NWQ8	17	56	16881	35.4643	0.991207	0.991207	43.8636
GOTERM_MF_DIRECT	GO:0042277~peptide binding	2	11.1111	0.0545022	Q13509, P15144	17	59	16881	33.661	0.99318	0.917417	45.5764
UP_SEQ_FEATURE	domain:Rho-GAP	2	11.1111	0.0561041	E9PNT2, P11274, A0A0G2JRG8	18	68	20063	32.7827	0.999978	0.883272	51.0856
INTERPRO	IPR000198:Rho GTPase-activating protein domain	2	11.1111	0.056246	E9PNT2, P11274, A0A0G2JRG8	17	67	18559	32.5882	0.992271	0.802282	46.2797
GOTERM_CC_DIRECT	GO:0005793~endoplasmic reticulum-Golgi intermediate compartment	2	11.1111	0.0616004	P09429, P15144	18	68	18224	29.7778	0.971574	0.509382	46.6239
GOTERM_BP_DIRECT	GO:0035556~intracellular signal transduction	3	16.6667	0.061633	P46109, P11274, Q9NWQ8	18	403	16792	6.94458	0.999999	0.999999	55.2886
UP_SEQ_FEATURE	domain:EGF-like 3	2	11.1111	0.0625063	Q9NY15, P98160	18	76	20063	29.3319	0.999994	0.864787	55.0395
UP_KEYWORDS	Immunity	3	16.6667	0.06299	O60667, Q9NWQ8, P09429	18	500	20581	6.86033	0.998848	0.676232	51.6869
GOTERM_CC_DIRECT	GO:0005886~plasma membrane	8	44.4444	0.0679592	P0C7N1, Q9NY15, P06733, Q07912, Q9NWQ8, A0A0A0MS51, P09429, P98160	18	4121	18224	1.96543	0.980575	0.481527	50.0899
BIOCARTA	h_gleevecPathway:Inhibition of Cellular Proliferation by Gleevec	2	11.1111	0.0688765	P46109, P11274	6	23	1625	23.5507	0.604547	0.604547	37.6539
UP_SEQ_FEATURE	domain:EGF-like 2	2	11.1111	0.0728227	Q9NY15, P98160	18	89	20063	25.0474	0.999999	0.865888	60.7974
GOTERM_BP_DIRECT	GO:0022617~extracellular matrix disassembly	2	11.1111	0.0742517	A0A0A0MS51, P98160	18	76	16792	24.5497	1	0.999719	62.328
GOTERM_BP_DIRECT	GO:0030324~lung development	2	11.1111	0.0742517	Q14190, P09429	18	76	16792	24.5497	1	0.999719	62.328
INTERPRO	IPR008936:Rho GTPase activation protein	2	11.1111	0.0756619	E9PNT2, P11274, A0A0G2JRG8	17	91	18559	23.9935	0.998652	0.808377	57.0232
GOTERM_BP_DIRECT	GO:0030154~cell differentiation	3	16.6667	0.0782682	Q14190, Q07912, P15144	18	462	16792	6.05772	1	0.996847	64.3447
UP_KEYWORDS	Cytoplasm	8	44.4444	0.0796002	Q13509, E9PNT2, H0Y4R1, A0A0G2JRG8, P06733, A0A0A0MS51, P09429, P58546, P15144	18	4816	20581	1.89932	0.999821	0.708396	60.444
SMART	SM00324:RhoGAP	2	11.1111	0.0808852	E9PNT2, P11274, A0A0G2JRG8	14	65	10057	22.1033	0.926808	0.72946	51.5476
UP_KEYWORDS	Alternative initiation	2	11.1111	0.0825488	P06733, A0A0A0MS51	18	104	20581	21.9882	0.999872	0.673729	61.8381
GOTERM_BP_DIRECT	GO:0007169~transmembrane receptor protein tyrosine kinase signaling pathway	2	11.1111	0.0929109	Q07912, Q9NWQ8	18	96	16792	19.4352	1	0.994306	70.8845
UP_KEYWORDS	Endocytosis	2	11.1111	0.0954165	E9PNT2, A0A0G2JRG8, Q07912	18	121	20581	18.899	0.99997	0.686137	67.4133
UP_SEQ_FEATURE	domain:EGF-like 1	2	11.1111	0.0969938	Q9NY15, P98160	18	120	20063	18.5769	1	0.906715	71.736
UP_KEYWORDS	Angiogenesis	2	11.1111	0.0991686	P15144, P98160	18	126	20581	18.149	0.999981	0.662486	68.8931
GOTERM_CC_DIRECT	GO:0005634~nucleus	9	50	0.0996949	Q14190, Q13509, E9PNT2, H0Y4R1, A0A0G2JRG8, P06733, Q07912, A0A0A0MS51, P09429, P58546	18	5415	18224	1.68273	0.997209	0.568364	64.5491
KEGG_PATHWAY	hsa05220:Chronic myeloid leukemia	2	11.1111	0.099934	P46109, P11274	11	72	6879	17.3712	0.98353	0.98353	61.614

## Sheet: pY Peptides Window
Accession	Gene Name	Peptides	pY sits position	Sequence window 21aa
O00401	WASL	VIY(+79.97)DFIEK	256	LKDRETSKVIyDFIEKTGGVE
O00459	PIK3R2	YDQLY(+79.97)EEYTR	464	QDKSREYDQLyEEYTRTSQEL
O60496	DOK2	GQEGEY(+79.97)AVPFDAVAR	299	APRPRGQEGEyAVPFDAVARS
O60667	FCMR	SQNNIY(+79.97)SAC(+57.02)PR	315	SPRPRSQNNIySACPRRARGA
O75995	SASH3	VHTDFTPSPY(+79.97)DHDSLK	189	RVHTDFTPSPyDHDSLKLQKG
P00338	LDHA	QVVESAY(+79.97)EVIK	239	EVHKQVVESAyEVIKLKGYTS
P00367	GLUD1	IVHSGLAY(+79.97)TMER	512	EKDIVHSGLAyTMERSARQIM
P04075	ALDOA	Y(+79.97)QY(+79.97)PALTPEQKKELSDIAHRIVAPGK	3	MPyQYPALTPEQK
P05556	ITGB1	WDTGENPIY(+79.97)K	783	AKWDTGENPIyKSAVTTVVNP
P06213	INSR	IYETDY(+79.97)YR	1189	GMTRDIYETDyYRKGGKGLLP
P06241	FYN	FTATEPQY(+79.97)QPGENL	531	EDYFTATEPQyQPGENL
P06241	FYN	LIEDNEY(+79.97)TAR	420	GLARLIEDNEyTARQGAKFPI
P06733	ENO1	AAVPSGASTGIY(+79.97)EALELRDNDKTR	44	AVPSGASTGIyEALELRDNDK
P07108	DBI	TKPSDEEMLFIY(+79.97)GHYK	29	KPSDEEMLFIyGHYKQATVGD
P07195	LDHB	MVVESAY(+79.97)EVIK	240	EVHKMVVESAyEVIKLKGYTN
P07355	ANXA2	AY(+79.97)TNFDAER	30	PPSAYGSVKAyTNFDAERDAL
P07355	ANXA2	LSLEGDHSTPPSAY(+79.97)GSVK	24	EGDHSTPPSAyGSVKAYTNFD
P07355	ANXA2	SLYY(+79.97)YIQQDTK	317	FKRKYGKSLYyYIQQDTKGDY
P07948	LYN	FYTATEGQY(+79.97)QQQP	508	DDFYTATEGQyQQQP
P07948	LYN	VENC(+57.02)PDELY(+79.97)DIMK	473	PRVENCPDELyDIMKMCWKEK
P07948	LYN	IEDNEY(+79.97)TAR	397	GLARVIEDNEyTAREGAKFPI
P08238	HSP90AB1	SIY(+79.97)YITGESK	484	SRMKETQKSIyYITGESKEQV
P08238	HSP90AB1	KADLIN(+.98)NLGT(+79.97)IAKSGTKAFMEALQAGADISMIGQFGVGFYSAY(+79.97)LVAEK	137	GQFGVGFYSAyLVAEKVVVIT
P08559	PDHA1	AAASTDY(+79.97)YKR	242	SVERAAASTDyYKRGDFIPGL
P08559	PDHA1	AAASTDYY(+79.97)KR	243	VERAAASTDYyKRGDFIPGLR
P08670	VIM	SLY(+79.97)ASSPGGVYATR	53	ALRPSTSRSLyASSPGGVYAT
P09429	HMGB1	GKMS(+79.97)S(+79.97)Y(+79.97)AFFVQTC(+57.02)R	16	PKKPRGKMSSyAFFVQTCREE
P0C7N1	OR8U8	M(+15.99)TPGIC(+57.02)IQ(+.98)LVAVPYSYSFLMALFHTILTFRLSY(+79.97)C(+57.02)HSNIVNHFYC(+57.02)DDMPLLRLTC(+57.02)SDTR	168	FHTILTFRLSyCHSNIVNHFY
P0DP24	CALM2	VFDKDGN(+.98)GY(+79.97)ISAAELR	100	FRVFDKDGNGyISAAELRHVM
P11274	BCR	GHGQPGADAEKPFY(+79.97)VNVEFHHER	177	QPGADAEKPFyVNVEFHHERG
P11413	G6PD	VQ(+.98)PNEAVY(+79.97)TK	401	VIRVQPNEAVyTKMMTKKPGM
P12931	SRC	EDYFTSTEPQY(+79.97)QPGENL	530	EDYFTSTEPQyQPGENL
P15144	ANPEP	VPVTLALNNTLFLIEERQY(+79.97)MPWEAALSSLSYFKLMFDRS(+79.97)EVYGPM(+15.99)K	692	NTLFLIEERQyMPWEAALSSL
P16284	PECAM1	DTETVY(+79.97)SEVR	713	DLGKKDTETVySEVRKAVPDA
P16333	NCK1	LY(+79.97)DLNM(+15.99)PAYVK	105	DSFVDPGERLyDLNMPAYVKF
P16333	NCK1	RKPSVPDSASPADDSFVDPGERLYDLNM(+15.99)PAY(+79.97)VK	112	ERLYDLNMPAyVKFNYMAERE
P18433	PTPRA	YIDAFSDY(+79.97)ANFK	798	VQEYIDAFSDyANFK
P23469	PTPRE	FSDY(+79.97)ANFK	696	VQDFIDIFSDyANFK
P24941	CDK2	IGEGTY(+79.97)GVVYK	15	QKVEKIGEGTyGVVYKARNKL
P24941	CDK2	IGEGTYGVVY(+79.97)K	19	KIGEGTYGVVyKARNKLTGEV
P26038	MSN	APDFVFY(+79.97)APR	270	IDKKAPDFVFyAPRLRINKRI
P28482	MAPK1	VADPDHDHTGFLTEY(+79.97)VATR	187	DHDHTGFLTEyVATRWYRAPE
P28906	CD34	LGEDPY(+79.97)YTEN(+.98)GGGQGYSSGPGTSPEAQGK	329	PTGERLGEDPyYTENGGGQGY
P29353	SHC1	LFDDPSY(+79.97)VNVQNLDK	427	PGRELFDDPSyVNVQNLDKAR
P40763	STAT3	YC(+57.02)RPESQEHPEADPGSAAPY(+79.97)LK	705	PEADPGSAAPyLKTKFICVTP
P42680	TEC	YVLDDQY(+79.97)TSSSGAK	519	GMARYVLDDQyTSSSGAKFPV
P42768	WAS	LIY(+79.97)DFIEDQGGLEAVR	291	LTDAETSKLIyDFIEDQGGLE
P46109	CRKL	HGNRNSNSYGIPEPAHAY(+79.97)AQ(+.98)PQTTTPLPAVSGSPGAAITPLPSTQNGPVFAK	207	SYGIPEPAHAyAQPQTTTPLP
P49840	GSK3A	EPNVSY(+79.97)IC(+57.02)SR	279	QLVRGEPNVSyICSRYYRAPE
P53396	ACLY	TTDGVY(+79.97)EGVAIGGDR	682	NIISRTTDGVyEGVAIGGDRY
P53778	MAPK12	QADSEMTGY(+79.97)VVTR	185	ARQADSEMTGyVVTRWYRAPE
P58546	MTPN	KPLHYAADC(+57.02)GQLEILEFLLLKGADIN(+.98)APDKHHITPLLS(+79.97)AVY(+79.97)EGHVSC(+57.02)VK	77	HHITPLLSAVyEGHVSCVKLL
P68104	EEF1A1	HALLAY(+79.97)TLGVK	141	GQTREHALLAyTLGVKQLIVG
P68104	EEF1A1	STTTGHLIY(+79.97)K	29	GKSTTTGHLIyKCGGIDKRTI
P98160	HSPG2	VVGSSGTQEASVLVT(+79.97)IQQRLSGSHSQGVAY(+79.97)PVRIES(+79.97)SSASLAN	2534	LSGSHSQGVAyPVRIESSSAS
Q01082	SPTBN1	LSGIEERY(+79.97)K	831	RGRLSGIEERyKEVAELTRLR
Q06124	PTPN11	GHEY(+79.97)TNIK	546	EQKSKRKGHEyTNIKYSLADQ
Q06124	PTPN11	IQNTGDY(+79.97)YDLYGGEK	62	THIKIQNTGDyYDLYGGEKFA
Q07912	TNK2	ALPQNDDHY(+79.97)VMQEHR	284	MRALPQNDDHyVMQEHRKVPF
Q07912	TNK2	VSSTHY(+79.97)YLLPERPSYLER	859	RDGKKVSSTHyYLLPERPSYL
Q07912	TNK2	KPTY(+79.97)DPVSEDQDPLSSDFK	518	QHLGGVKKPTyDPVSEDQDPL
Q13509	TUBB3	KAFLHWYTGEGM(+15.99)DEMEFT(+79.97)EAESNMNDLVSEY(+79.97)QQYQDATAEEEGEMYEDDEEESEAQGPK	422	ESNMNDLVSEyQQYQDATAEE
Q13523	PRPF4B	VADNDITPY(+79.97)LVSR	849	SHVADNDITPyLVSRFYRAPE
Q14190	SIM2	EN(+.98)GEFY(+79.97)ELAKLLPLPSAITS(+79.97)QLDK	21	TRREKENGEFyELAKLLPLPS
Q14289	PTK2B	Y(+79.97)IEDEDYY(+79.97)KASVTR	573	VKLGDFGLSRyIEDEDYYKAS
Q14289	PTK2B	YIEDEDYY(+79.97)K	580	LSRYIEDEDYyKASVTRLPIK
Q14289	PTK2B	YIEDEDY(+79.97)YK	579	GLSRYIEDEDyYKASVTRLPI
Q15366	PCBP2	ESTGAQVQVAGDMLPNSTERAITIAGIPQSIIEC(+57.02)VKQIC(+57.02)VVMLETLSQSPPKGVTIPY(+79.97)RPKPS(+79.97)S(+79.97)	182	QSPPKGVTIPyRPKPSSSPVI
Q16539	MAPK14	HTDDEMTGY(+79.97)VATR	182	ARHTDDEMTGyVATRWYRAPE
Q16836	HADH	LDY(+79.97)VGLDTTK	264	YPMGPFELLDyVGLDTTKFIV
Q71U36	TUBA1A	NEAIY(+79.97)DIC(+57.02)R	210	CAFMVDNEAIyDICRRNLDIE
Q86YV5	PRAG1	ATQPEPIY(+79.97)AESTK	413	PREATQPEPIyAESTKRKKAA
Q8WWW8	GAB3	VDY(+79.97)VQVDEQK	560	LLLSEEQRVDyVQVDEQKTQA
Q92835	INPP5D	KLY(+79.97)DFVK	865	TSQGKTREKLyDFVKTERDES
Q92973	TNPO1	WN(+.98)MLKDEDKDLFPLLEC(+57.02)LSSVATALQSGFLPYC(+57.02)EPVY(+79.97)QRC(+57.02)VNLVQ(+.98)K	617	SGFLPYCEPVyQRCVNLVQKT
Q99704	DOK1	SHNSALY(+79.97)SQVQK	449	SGIKSHNSALySQVQKSGASG
Q99704	DOK1	VKEEGYELPYNPATDDY(+79.97)AVPPPR	409	ELPYNPATDDyAVPPPRSTKP
Q9BXI2	SLC25A2	GTGPALMAYVAEN(+.98)SVLFMC(+57.02)Y(+79.97)GFC(+57.02)QQFVRKVAGMDK	85	VAENSVLFMCyGFCQQFVRKV
Q9H422	HIPK3	TVC(+57.02)STY(+79.97)LQSR	359	SHVSKTVCSTyLQSRYYRAPE
Q9H6L5	RETREG1	VY(+79.97)HLISVMILGRVIMQ(+.98)IIKDMVLSRT(+79.97)R	117	WFLALTPWRVyHLISVMILGR
Q9NRY4	ARHGAP35	NEEENIY(+79.97)SVPHDSTQGK	1105	VKPRNEEENIySVPHDSTQGK
Q9NUJ1	ABHD10	YSEEGVY(+79.97)NVQYSFIK	215	MPSKYSEEGVyNVQYSFIKEA
Q9NWQ8	PAG1	AEFAEY(+79.97)ASVDR	227	QTEGKAEFAEyASVDRNKKCR
Q9NWQ8	PAG1	ENDY(+79.97)ESISDLQQGR	417	HHGLVPKENDyESISDLQQGR
Q9NWQ8	PAG1	SPSSC(+57.02)NDLY(+79.97)ATVK	359	QRSPSSCNDLyATVKDFEKTP
Q9NWQ8	PAG1	SREEDPTLTEEEISAMY(+79.97)SSVNKPGQLVNK	317	TLTEEEISAMySSVNKPGQLV
Q9NWQ8	PAG1	SVDGDQGLGMEGPY(+79.97)EVLK	163	GDQGLGMEGPyEVLKDSSSQE
Q9NY15	STAB1	KGGHRNSLLGPAHWIVFY(+79.97)NHSGQPEVNHVPLEGPM(+15.99)LEAPGRS(+79.97)LIGL	1221	LLGPAHWIVFyNHSGQPEVNH
Q9UBQ7	GRHPR	ETAVFINISRGDVVN(+.98)Q(+.98)DDLY(+79.97)QALASGK	255	RGDVVNQDDLyQALASGKIAA
Q9Y463	DYRK1B	IYQY(+79.97)IQSR	273	SCQLGQRIYQyIQSRFYRSPE
A0A075B730	EPPK1	LRGRAVPVWDVLASGY(+79.97)VSGAAREELLAEFGSGT(+79.97)LDLPALT(+79.97)R	4656	VPVWDVLASGyVSGAAREELL
A0A087WVF7	ITSN2	EEPEALY(+79.97)AAVNK	951	EVKREEPEALyAAVNKKPTSA
A0A0A0MR54	SCARF1	QAEEERQEEPEY(+79.97)ENVVPISRPPEP	732	AEEERQEEPEyENVVPISRPP
A0A0A0MS51	GSN	KLAKLY(+79.97)KVSNGAGTMSVS(+79.97)LVADENPFAQ(+.98)GALK	267	DAANRKLAKLyKVSNGAGTMS
A0A0A0MS51	GSN	VPVDPATY(+79.97)GQ(+.98)FYGGDS(+79.97)	431	SNKVPVDPATyGQFYGGDSYI
A0A0B4J1Y2	TTC21A	EYDKAVQSYKDVFS(+79.97)YLPTDNKVMLELAQLY(+79.97)LLQGHLDLC(+57.02)EQHC(+57.02)AILLQT(+79.97)EQNHET	926	NKVMLELAQLyLLQGHLDLCE
A0A0G2JRG8	ARHGAP27	AC(+57.02)SVAGSWVC(+57.02)PRPLARSDSENVYEVIQDLHVPPREESAEQVDDPPEPVY(+79.97)ANIERQPR	228	EQVDDPPEPVyANIERQPRAT
E7EMB8	PTPN18	SAEEAPLY(+79.97)SKVTPR	194	GARSAEEAPLySKVTPRAQRP
E9PJF0	MAPK3	IADPEHDHTGFLTEY(+79.97)VATR	204	EHDHTGFLTEyVATRWYRAPE
E9PNT2	ARHGAP27	ALPAQVDDPPEPVY(+79.97)ANIER	28	AQVDDPPEPVyANIERQPRAT
F5GZ78	PXN	VGEEEHVY(+79.97)SFPNK	116	CSRVGEEEHVySFPNKQKSAE
H0Y3C5	HCK	YTATESQY(+79.97)QQQP	521	DDFYTATESQyQQQP
H0Y4R1	IMPDH2	KQ(+.98)LLC(+57.02)GAAIGTHEDDKY(+79.97)RLDLLAQAGVDVVVLDSSQGNSIFQINM(+15.99)IK	190	AAIGTHEDDKyRLDLLAQAGV
H0YAR3	TOP1MT	LNY(+79.97)LDPR	69	QVALGTSKLNyLDPRISIAWC
K7EK35	STAT5A	AVDGY(+79.97)VKPQIK	663	TPVLAKAVDGyVKPQIKQVVP
Q5SQL3	HIPK1	AVC(+57.02)STY(+79.97)LQSR	352	SHVSKAVCSTyLQSRYYRAPE
