# Supplementary material for: CD34 is a target for covalent EGFR inhibitors to eliminate stem/progenitor cells in acute and chronic myeloid leukemia
Source: Research Square preprint supplement (doi:10.21203/rs.3.rs-646513/v1), 2021-07-12
Supplement: Supplementary file 5 [file c6a85e639bfa2c8513b33af1.xlsx]

## Sheet: Sheet1
Supplementary Table 5: Characteristics of AML or CML patient samples at diagnosis used in the experiments.
	Sex	Age(year)	Chromosome	Molecular data
AML	F	18	ND	ND
AML	M	25	ND	ND
AML	F	40	46,XX[10]	DNMT3A,IDH2,NPM1,FLT3-ITD
AML	F	47	46,XX[4]	CEBPA,NPM1,FLT3-ITD
AML	F	41	46,XX,-5,del(7)(q31,q36）,+10[6]/46,XX[4]	NRAS
AML	M	64	46,XY[20]	TET2,C-KIT,NRAS
AML	M	60	46,XY,t(9;22)(q34;q11)[4]/46,X,-Y[2]/46,XY[13]	CEBPA
AML	M	67	46,XY[10]	RUNX1,IDH2,ASXL1,NRAS
AML	F	62	46,XX[6]	TET2,DNMT3A,NPM1
AML	F	54	46,XX[20]	FLT3-ITD
AML	M	71	46,XY[10]	DNMT3A,C-KIT,NPM1
AML	M	69	46,XY[20]	TET2,CEBPA
AML	F	48	45,XX,-15,+18[3]	DMNT3A,NPM1,IDH2
AML	M	8	46,X,-Y,+8,t(8,21)	AML1-ETO,DNMT3A
AML	F	21	46,XX,t(8;21)(q22;q22)[20]	AML1-ETO,
AML	F	31	45,XX,-6,t(8;21)(q22;q22)[8]//46,XX,t(8;21)(q22;q22)[3]	AML1-ETO,C-KIT,NPM1
AML	F	30	46,XX,t(8;21)(q22;q22)[20]	AML1-ETO,C-KIT
AML	F	34	47,XX,+8[3]/46，XX,[27]	ND
AML	F	49	46,XX,t(8；X),(q22；28)[9]	NRAS,SF3B1,CEBPA
AML	M	34	46,XY[10]	NPM1,FLT3-ITD
AML	F	33	46,XX[10]	WT1,NPM1,TET2
AML	F	26	ND	WT1,CBFB-MYH11
AML	F	38	46,XX[12]	NPM1,DNMT3A,TET2
AML	M	58	46,XY[10]-5,-8-15,+22	TET2,P53
CML	M	74	46,XY,t(9;22)(q34;q11.2)[10]	BCR/ABL（p210）67.86%
CML	M	46	46,XX[20]	BCR/ABL（p210）227.93%
CML	M	20	46,XY, t(9;22) (q 34;q 11.2) [6]	BCR/ABL（p210）65.57%
CML	M	51	46,XY,t(9;22)(q34;q11.2)[10]	BCR/ABL（p210）44.24%
CML	M	64	46,XY,t(9;22)(q34;q11.2)[20]	BCR/ABL（p210）309.11%
CML	F	39	46,XY,t(9;22)(q34;q11.2)[10]	BCR/ABL（p210）69.88%
CML	M	28	46,XY,t(9;22)(q34;q11.2)[10]	BCR/ABL（p210）218.8%
CML	M	29	46,XY,t(9;22)(q34;q11.2)[20]	BCR/ABL（p210）70.09%
ND:not determined
