# Supplementary material for: CD34 is a target for covalent EGFR inhibitors to eliminate stem/progenitor cells in acute and chronic myeloid leukemia
Source: Research Square preprint supplement (doi:10.21203/rs.3.rs-646513/v1), 2021-07-12
Supplement: Supplementary file 6 [file dfaacd671ef464d619800ae8.xlsx]

## Sheet: all identified proteins
				Supplementary Table 4: Immunoprecipitation–MS (IP–MS) analysis using antibody against CD34 in vehicle or osimertinib treated CD34+ cells purified from AML patients.
Protein Group	Protein ID	Accession	-10lgP	Coverage (%)	Coverage (%) CTL_IgG	Coverage (%) osimertinib_IgG	Coverage (%) CTL_CD34	Coverage (%) osimertinib_CD34	Area CTL_IgG	Area osimertinib_IgG	Area CTL_CD34	Area osimertinib_CD34	#Peptides	#Unique	#Spec CTL_IgG	#Spec osimertinib_IgG	#Spec CTL_CD34	#Spec osimertinib_CD34	PTM	Avg. Mass	Description
8	3	sp|P35527|K1C9_HUMAN	527.4	89	81	80	81	83	1380000000	1580000000	3750000000	3390000000	157	155	235	279	253	261	Carbamidomethylation; Acetylation (Protein N-term); Oxidation (M); Deamidation (NQ)	62064	Keratin type I cytoskeletal 9 OS=Homo sapiens OX=9606 GN=KRT9 PE=1 SV=3
2	7	sp|P04264|K2C1_HUMAN	493.62	85	79	80	77	78	343000000	361000000	545000000	531000000	188	5	463	440	449	479	Carbamidomethylation; Acetylation (Protein N-term); Oxidation (M); Deamidation (NQ)	66039	Keratin type II cytoskeletal 1 OS=Homo sapiens OX=9606 GN=KRT1 PE=1 SV=6
4	17	sp|P35579|MYH9_HUMAN	471.38	79	12	11	78	71	4460000	2660000	7450000000	2620000000	350	265	30	26	945	673	Carbamidomethylation; Acetylation (Protein N-term); Oxidation (M); Deamidation (NQ)	226530	Myosin-9 OS=Homo sapiens OX=9606 GN=MYH9 PE=1 SV=4
12	1	sp|Q15233|NONO_HUMAN	468.53	90	38	44	90	80	12600000	19100000	12000000000	3830000000	127	123	41	48	417	245	Carbamidomethylation; Acetylation (Protein N-term); Oxidation (M); Deamidation (NQ)	54232	Non-POU domain-containing octamer-binding protein OS=Homo sapiens OX=9606 GN=NONO PE=1 SV=4
5	16	sp|P09874|PARP1_HUMAN	456.54	84	18	14	82	78	1910000	1780000	12400000000	10400000000	263	261	15	17	683	714	Carbamidomethylation; Acetylation (Protein N-term); Oxidation (M); Deamidation (NQ)	113084	Poly [ADP-ribose] polymerase 1 OS=Homo sapiens OX=9606 GN=PARP1 PE=1 SV=4
9	4	sp|P35908|K22E_HUMAN	419.75	85	81	82	80	79	555000000	583000000	948000000	818000000	140	90	286	287	224	236	Carbamidomethylation; Acetylation (Protein N-term); Oxidation (M); Deamidation (NQ)	65433	Keratin type II cytoskeletal 2 epidermal OS=Homo sapiens OX=9606 GN=KRT2 PE=1 SV=2
49	9	sp|P14866|HNRPL_HUMAN	416.31	76	8	22	73	75		398000	337000000	339000000	73	12	6	15	143	136	Carbamidomethylation; Oxidation (M); Deamidation (NQ)	64133	Heterogeneous nuclear ribonucleoprotein L OS=Homo sapiens OX=9606 GN=HNRNPL PE=1 SV=2
17	11	sp|Q00839|HNRPU_HUMAN	406.49	62	14	13	58	58	4960000	4930000	2050000000	2290000000	128	127	21	21	280	306	Carbamidomethylation; Acetylation (Protein N-term); Oxidation (M); Deamidation (NQ)	90585	Heterogeneous nuclear ribonucleoprotein U OS=Homo sapiens OX=9606 GN=HNRNPU PE=1 SV=6
29	89	sp|P35637|FUS_HUMAN	396.65	51	14	17	38	51			38500000	93100000	104	8	12	21	171	241	Carbamidomethylation; Acetylation (Protein N-term); Oxidation (M); Deamidation (NQ)	53426	RNA-binding protein FUS OS=Homo sapiens OX=9606 GN=FUS PE=1 SV=1
31	112	tr|H3BPE7|H3BPE7_HUMAN	392.58	51	14	17	38	51			311000	612000	97	1	12	21	162	223	Carbamidomethylation; Acetylation (Protein N-term); Oxidation (M); Deamidation (NQ)	53497	RNA-binding protein FUS OS=Homo sapiens OX=9606 GN=FUS PE=1 SV=1
65	20	tr|A0A3B3ITJ4|A0A3B3ITJ4_HUMAN	384.76	76	9	22	73	76			3870000	4820000	64	3	6	14	117	115	Carbamidomethylation; Oxidation (M); Deamidation (NQ)	59219	Heterogeneous nuclear ribonucleoprotein L (Fragment) OS=Homo sapiens OX=9606 GN=HNRNPL PE=1 SV=1
45	640	sp|P28906|CD34_HUMAN	376.87	41	0	0	39	41			6000000000	5910000000	73	73	0	0	152	168	Carbamidomethylation; Oxidation (M); Deamidation (NQ)	40716	Hematopoietic progenitor cell antigen CD34 OS=Homo sapiens OX=9606 GN=CD34 PE=1 SV=2
39	18	sp|P14618|KPYM_HUMAN	376.6	79	34	36	75	79	196000	104000	23100000	16400000	90	10	32	32	154	143	Carbamidomethylation; Acetylation (Protein N-term); Oxidation (M); Deamidation (NQ)	57937	Pyruvate kinase PKM OS=Homo sapiens OX=9606 GN=PKM PE=1 SV=4
61	30	sp|Q86YZ3|HORN_HUMAN	375.89	26	14	20	12	12	25400000	84400000	85400000	78900000	48	48	38	88	56	86	Carbamidomethylation; Deamidation (NQ)	282389	Hornerin OS=Homo sapiens OX=9606 GN=HRNR PE=1 SV=2
13	13	sp|P08670|VIME_HUMAN	374.43	93	71	75	90	90	72500000	77200000	6260000000	2610000000	102	91	99	104	306	217	Carbamidomethylation; Oxidation (M); Deamidation (NQ)	53652	Vimentin OS=Homo sapiens OX=9606 GN=VIM PE=1 SV=4
40	49	sp|Q92614|MY18A_HUMAN	372.75	46	0	0	46	34			782000000	282000000	122	119	0	0	220	143	Carbamidomethylation; Oxidation (M); Deamidation (NQ)	233113	Unconventional myosin-XVIIIa OS=Homo sapiens OX=9606 GN=MYO18A PE=1 SV=3
40	50	tr|A0A0D9SFK2|A0A0D9SFK2_HUMAN	372.75	47	0	0	47	35			782000000	282000000	122	119	0	0	220	143	Carbamidomethylation; Oxidation (M); Deamidation (NQ)	231105	Unconventional myosin-XVIIIa OS=Homo sapiens OX=9606 GN=MYO18A PE=1 SV=1
10	32	sp|P13645|K1C10_HUMAN	370.09	71	69	63	59	62	874000000	725000000	1040000000	807000000	104	61	259	272	238	200	Carbamidomethylation; Acetylation (Protein N-term); Oxidation (M); Deamidation (NQ)	58827	Keratin type I cytoskeletal 10 OS=Homo sapiens OX=9606 GN=KRT10 PE=1 SV=6
42	39	tr|H3BTN5|H3BTN5_HUMAN	362.09	69	33	35	67	68					78	0	28	29	144	132	Carbamidomethylation; Acetylation (Protein N-term); Oxidation (M); Deamidation (NQ)	53045	Pyruvate kinase (Fragment) OS=Homo sapiens OX=9606 GN=PKM PE=1 SV=1
35	22	sp|Q16666|IF16_HUMAN	357.36	65	3	4	61	58	168000	101000	1110000000	344000000	89	89	3	3	225	156	Carbamidomethylation; Oxidation (M); Deamidation (NQ)	88256	Gamma-interferon-inducible protein 16 OS=Homo sapiens OX=9606 GN=IFI16 PE=1 SV=3
63	55	sp|Q15424|SAFB1_HUMAN	351.95	45	0	0	44	39			407000000	141000000	65	43	0	0	141	123	Carbamidomethylation; Acetylation (Protein N-term); Oxidation (M); Deamidation (NQ)	102642	Scaffold attachment factor B1 OS=Homo sapiens OX=9606 GN=SAFB PE=1 SV=4
25	125	sp|P78527|PRKDC_HUMAN	350.81	35	0	0	33	31			601000000	369000000	164	162	0	0	263	251	Carbamidomethylation; Oxidation (M); Deamidation (NQ)	469093	DNA-dependent protein kinase catalytic subunit OS=Homo sapiens OX=9606 GN=PRKDC PE=1 SV=3
59	10	sp|P61978|HNRPK_HUMAN	350.5	65	21	28	65	64		442000	407000000	310000000	61	22	18	21	126	94	Carbamidomethylation; Acetylation (Protein N-term); Oxidation (M); Deamidation (NQ)	50976	Heterogeneous nuclear ribonucleoprotein K OS=Homo sapiens OX=9606 GN=HNRNPK PE=1 SV=1
34	88	sp|Q02880|TOP2B_HUMAN	345.24	47	1	1	45	45	869000	239000	383000000	287000000	115	82	2	2	190	204	Carbamidomethylation; Oxidation (M); Deamidation (NQ)	183266	DNA topoisomerase 2-beta OS=Homo sapiens OX=9606 GN=TOP2B PE=1 SV=3
101	47	sp|O76021|RL1D1_HUMAN	342.72	53	2	4	51	52	53800	52800	536000000	453000000	42	41	1	2	85	104	Carbamidomethylation; Acetylation (Protein N-term); Oxidation (M); Deamidation (NQ)	54973	Ribosomal L1 domain-containing protein 1 OS=Homo sapiens OX=9606 GN=RSL1D1 PE=1 SV=3
47	25	sp|P23246|SFPQ_HUMAN	339.36	52	11	11	51	51	882000	913000	1000000000	730000000	66	63	11	9	149	132	Carbamidomethylation; Oxidation (M); Deamidation (NQ)	76150	Splicing factor proline- and glutamine-rich OS=Homo sapiens OX=9606 GN=SFPQ PE=1 SV=2
76	54	sp|Q14151|SAFB2_HUMAN	338.77	50	1	0	48	41	282000		169000000	65300000	69	47	1	0	114	102	Carbamidomethylation; Acetylation (Protein N-term); Oxidation (M); Deamidation (NQ)	107474	Scaffold attachment factor B2 OS=Homo sapiens OX=9606 GN=SAFB2 PE=1 SV=1
99	38	tr|J3KMX2|J3KMX2_HUMAN	338.06	67	3	5	64	63	117000	131000	398000000	438000000	54	44	1	2	72	89	Carbamidomethylation; Oxidation (M); Deamidation (NQ)	52238	SWI/SNF-related matrix-associated actin-dependent regulator of chromatin subfamily D member 2 OS=Homo sapiens OX=9606 GN=SMARCD2 PE=1 SV=1
99	40	tr|B9EGA3|B9EGA3_HUMAN	338.06	62	3	4	60	58	117000	131000	398000000	438000000	54	44	1	2	72	89	Carbamidomethylation; Oxidation (M); Deamidation (NQ)	55857	SMARCD2 protein OS=Homo sapiens OX=9606 GN=SMARCD2 PE=1 SV=1
99	44	sp|Q92925|SMRD2_HUMAN	338.06	57	3	4	55	54	117000	131000	398000000	438000000	54	44	1	2	72	89	Carbamidomethylation; Oxidation (M); Deamidation (NQ)	58921	SWI/SNF-related matrix-associated actin-dependent regulator of chromatin subfamily D member 2 OS=Homo sapiens OX=9606 GN=SMARCD2 PE=1 SV=3
176	12	sp|Q14676|MDC1_HUMAN	336.69	31	0	0	27	24		0	93400000	57600000	40	40	0	1	52	47	Carbamidomethylation; Oxidation (M); Deamidation (NQ)	226664	Mediator of DNA damage checkpoint protein 1 OS=Homo sapiens OX=9606 GN=MDC1 PE=1 SV=3
84	120	sp|P08621|RU17_HUMAN	334.65	51	6	13	50	49	445000	360000	1350000000	837000000	44	44	4	9	97	95	Carbamidomethylation; Oxidation (M); Deamidation (NQ)	51557	U1 small nuclear ribonucleoprotein 70 kDa OS=Homo sapiens OX=9606 GN=SNRNP70 PE=1 SV=2
26	57	sp|P02533|K1C14_HUMAN	333.19	72	69	69	57	55	73400000	69100000	32700000	30700000	62	12	151	154	92	79	Carbamidomethylation; Oxidation (M); Deamidation (NQ)	51562	Keratin type I cytoskeletal 14 OS=Homo sapiens OX=9606 GN=KRT14 PE=1 SV=4
32	34	sp|P08779|K1C16_HUMAN	330.53	70	65	69	61	62	70300000	124000000	91400000	25700000	61	32	102	145	88	71	Carbamidomethylation; Oxidation (M); Deamidation (NQ)	51268	Keratin type I cytoskeletal 16 OS=Homo sapiens OX=9606 GN=KRT16 PE=1 SV=4
52	45	sp|P11387|TOP1_HUMAN	330.18	60	0	0	57	57			798000000	648000000	84	84	0	0	141	153	Carbamidomethylation; Acetylation (Protein N-term); Oxidation (M); Deamidation (NQ)	90726	DNA topoisomerase 1 OS=Homo sapiens OX=9606 GN=TOP1 PE=1 SV=2
22	35	sp|P60709|ACTB_HUMAN	329.11	75	69	71	71	69	4720000	2500000	4830000	8560000	59	2	142	132	125	122	Carbamidomethylation; Acetylation (Protein N-term); Oxidation (M); Deamidation (NQ)	41737	Actin cytoplasmic 1 OS=Homo sapiens OX=9606 GN=ACTB PE=1 SV=1
24	61	sp|P63261|ACTG_HUMAN	328.01	75	69	71	71	69	140000	51200	41900	49400	58	1	135	126	117	116	Carbamidomethylation; Acetylation (Protein N-term); Oxidation (M); Deamidation (NQ)	41793	Actin cytoplasmic 2 OS=Homo sapiens OX=9606 GN=ACTG1 PE=1 SV=1
14	143	sp|P13647|K2C5_HUMAN	325.3	73	70	67	61	59	96400000	87400000	100000000	92800000	88	18	193	223	145	131	Carbamidomethylation; Oxidation (M); Deamidation (NQ)	62378	Keratin type II cytoskeletal 5 OS=Homo sapiens OX=9606 GN=KRT5 PE=1 SV=3
60	62	sp|P17844|DDX5_HUMAN	324.15	73	20	20	68	73	483000	496000	389000000	835000000	68	51	17	18	94	136	Carbamidomethylation; Oxidation (M); Deamidation (NQ)	69148	Probable ATP-dependent RNA helicase DDX5 OS=Homo sapiens OX=9606 GN=DDX5 PE=1 SV=1
115	87	sp|Q92609|TBCD5_HUMAN	323.8	52	0	0	50	52			252000000	198000000	51	50	0	0	68	80	Carbamidomethylation; Acetylation (Protein N-term); Oxidation (M); Deamidation (NQ)	89004	TBC1 domain family member 5 OS=Homo sapiens OX=9606 GN=TBC1D5 PE=1 SV=1
53	76	sp|Q08211|DHX9_HUMAN	323.47	46	1	1	39	44	46700	53700	341000000	360000000	67	67	1	1	129	159	Carbamidomethylation; Oxidation (M); Deamidation (NQ)	140958	ATP-dependent RNA helicase A OS=Homo sapiens OX=9606 GN=DHX9 PE=1 SV=4
80	48	tr|A0A1W2PQ51|A0A1W2PQ51_HUMAN	323.21	51	10	14	51	49	300000	303000	283000000	197000000	48	32	13	15	80	88	Carbamidomethylation; Oxidation (M); Deamidation (NQ)	80458	Probable ATP-dependent RNA helicase DDX17 OS=Homo sapiens OX=9606 GN=DDX17 PE=1 SV=1
80	51	tr|A0A1X7SBZ2|A0A1X7SBZ2_HUMAN	323.21	51	10	14	51	49	300000	303000	283000000	197000000	48	32	13	15	80	88	Carbamidomethylation; Oxidation (M); Deamidation (NQ)	80255	Probable ATP-dependent RNA helicase DDX17 OS=Homo sapiens OX=9606 GN=DDX17 PE=1 SV=1
80	52	sp|Q92841|DDX17_HUMAN	323.21	51	10	14	51	49	300000	303000	283000000	197000000	48	32	13	15	80	88	Carbamidomethylation; Oxidation (M); Deamidation (NQ)	80273	Probable ATP-dependent RNA helicase DDX17 OS=Homo sapiens OX=9606 GN=DDX17 PE=1 SV=2
113	115	sp|P46013|KI67_HUMAN	319.37	22	0	0	20	18	1280000		77700000	37800000	69	69	1	0	85	65	Carbamidomethylation; Oxidation (M); Deamidation (NQ)	358695	Proliferation marker protein Ki-67 OS=Homo sapiens OX=9606 GN=MKI67 PE=1 SV=2
75	171	tr|Q5T6W2|Q5T6W2_HUMAN	318.8	59	26	31	59	58			5050000	1760000	40	1	18	20	99	70	Carbamidomethylation; Acetylation (Protein N-term); Oxidation (M); Deamidation (NQ)	41807	Heterogeneous nuclear ribonucleoprotein K (Fragment) OS=Homo sapiens OX=9606 GN=HNRNPK PE=1 SV=1
146	46	sp|O43707|ACTN4_HUMAN	318.52	57	1	2	57	34	1840000	1540000	82000000	12700000	52	33	1	2	82	41	Carbamidomethylation; Acetylation (Protein N-term); Oxidation (M); Deamidation (NQ)	104854	Alpha-actinin-4 OS=Homo sapiens OX=9606 GN=ACTN4 PE=1 SV=2
128	92	tr|E7EQT4|E7EQT4_HUMAN	317.1	32	0	0	30	31			53400000	24700000	55	26	0	0	80	66	Carbamidomethylation; Oxidation (M); Deamidation (NQ)	147362	Apoptotic chromatin condensation inducer in the nucleus OS=Homo sapiens OX=9606 GN=ACIN1 PE=1 SV=2
64	114	sp|P35580|MYH10_HUMAN	316.5	25	2	0	22	16	627000		4290000		82	12	4	0	160	99	Carbamidomethylation; Oxidation (M); Deamidation (NQ)	228997	Myosin-10 OS=Homo sapiens OX=9606 GN=MYH10 PE=1 SV=3
15	104	sp|P04259|K2C6B_HUMAN	315.67	71	67	68	60	59	1350000	1020000	2470000	2510000	74	1	157	184	131	137	Carbamidomethylation; Acetylation (Protein N-term); Oxidation (M); Deamidation (NQ)	60067	Keratin type II cytoskeletal 6B OS=Homo sapiens OX=9606 GN=KRT6B PE=1 SV=5
16	99	sp|P02538|K2C6A_HUMAN	315.41	72	68	68	61	60	7700000	2760000	13600000	13700000	75	3	164	183	133	135	Carbamidomethylation; Acetylation (Protein N-term); Oxidation (M); Deamidation (NQ)	60045	Keratin type II cytoskeletal 6A OS=Homo sapiens OX=9606 GN=KRT6A PE=1 SV=3
87	218	sp|Q92804|RBP56_HUMAN	314.64	49	11	8	42	48	1350000	1440000	220000000	274000000	47	34	7	9	77	95	Carbamidomethylation; Oxidation (M); Deamidation (NQ)	61830	TATA-binding protein-associated factor 2N OS=Homo sapiens OX=9606 GN=TAF15 PE=1 SV=1
95	77	sp|Q14980|NUMA1_HUMAN	314.38	34	2	3	29	30					67	0	5	6	85	81	Carbamidomethylation; Oxidation (M); Deamidation (NQ)	238257	Nuclear mitotic apparatus protein 1 OS=Homo sapiens OX=9606 GN=NUMA1 PE=1 SV=2
66	28	sp|Q9BUJ2|HNRL1_HUMAN	313.91	45	2	4	37	44	106000	199000	431000000	650000000	48	47	2	3	103	137	Carbamidomethylation; Oxidation (M); Deamidation (NQ)	95739	Heterogeneous nuclear ribonucleoprotein U-like protein 1 OS=Homo sapiens OX=9606 GN=HNRNPUL1 PE=1 SV=2
96	78	tr|A0A087WY61|A0A087WY61_HUMAN	313.79	34	2	3	29	30					67	0	5	6	85	81	Carbamidomethylation; Oxidation (M); Deamidation (NQ)	236160	Nuclear mitotic apparatus protein 1 OS=Homo sapiens OX=9606 GN=NUMA1 PE=1 SV=1
18	105	sp|P48668|K2C6C_HUMAN	311.86	71	66	66	59	58					72	0	156	181	131	132	Carbamidomethylation; Acetylation (Protein N-term); Oxidation (M); Deamidation (NQ)	60025	Keratin type II cytoskeletal 6C OS=Homo sapiens OX=9606 GN=KRT6C PE=1 SV=3
89	42	sp|P26599|PTBP1_HUMAN	309.98	62	13	16	62	47	835000	1810000	643000000	152000000	56	48	8	16	116	53	Carbamidomethylation; Acetylation (Protein N-term); Oxidation (M); Deamidation (NQ)	57221	Polypyrimidine tract-binding protein 1 OS=Homo sapiens OX=9606 GN=PTBP1 PE=1 SV=1
103	68	sp|O60832|DKC1_HUMAN	305.75	63	11	9	59	56	469000	299000	832000000	316000000	51	51	7	5	85	70	Carbamidomethylation; Acetylation (Protein N-term); Oxidation (M); Deamidation (NQ)	57674	H/ACA ribonucleoprotein complex subunit DKC1 OS=Homo sapiens OX=9606 GN=DKC1 PE=1 SV=3
220	73	sp|Q6WCQ1|MPRIP_HUMAN	305.08	49	0	0	49	21			8650000	651000	44	6	0	0	67	18	Carbamidomethylation; Oxidation (M); Deamidation (NQ)	116533	Myosin phosphatase Rho-interacting protein OS=Homo sapiens OX=9606 GN=MPRIP PE=1 SV=3
33	224	sp|P02768|ALBU_HUMAN	304.79	59	48	49	34	44	236000000	170000000	58300000	65300000	65	30	143	143	69	86	Carbamidomethylation; Oxidation (M); Deamidation (NQ)	69367	Serum albumin OS=Homo sapiens OX=9606 GN=ALB PE=1 SV=2
143	91	tr|D3DTX6|D3DTX6_HUMAN	302.9	43	0	0	43	36			432000000	159000000	43	42	0	0	77	58	Carbamidomethylation; Oxidation (M); Deamidation (NQ)	89334	Neurabin-2 OS=Homo sapiens OX=9606 GN=PPP1R9B PE=1 SV=1
173	53	sp|Q9Y2X3|NOP58_HUMAN	299.41	54	7	7	50	52	375000	222000	234000000	472000000	34	34	5	3	47	51	Carbamidomethylation; Oxidation (M); Deamidation (NQ)	59578	Nucleolar protein 58 OS=Homo sapiens OX=9606 GN=NOP58 PE=1 SV=1
70	160	sp|Q9Y5B9|SP16H_HUMAN	299.35	50	0	0	45	42			357000000	210000000	71	71	0	0	124	110	Carbamidomethylation; Acetylation (Protein N-term); Oxidation (M); Deamidation (NQ)	119914	FACT complex subunit SPT16 OS=Homo sapiens OX=9606 GN=SUPT16H PE=1 SV=1
104	126	sp|Q1KMD3|HNRL2_HUMAN	299.18	43	0	0	42	39			175000000	169000000	45	45	0	0	78	82	Carbamidomethylation; Oxidation (M); Deamidation (NQ)	85105	Heterogeneous nuclear ribonucleoprotein U-like protein 2 OS=Homo sapiens OX=9606 GN=HNRNPUL2 PE=1 SV=1
106	72	sp|P12956|XRCC6_HUMAN	299.03	58	6	7	55	58	5510000	5300000	168000000	306000000	48	48	4	4	67	87	Carbamidomethylation; Oxidation (M); Deamidation (NQ)	69843	X-ray repair cross-complementing protein 6 OS=Homo sapiens OX=9606 GN=XRCC6 PE=1 SV=2
83	135	sp|P13010|XRCC5_HUMAN	298.4	50	2	3	47	48	72000	188000	247000000	376000000	48	48	2	2	82	108	Carbamidomethylation; Oxidation (M); Deamidation (NQ)	82705	X-ray repair cross-complementing protein 5 OS=Homo sapiens OX=9606 GN=XRCC5 PE=1 SV=3
105	122	sp|Q9NWH9|SLTM_HUMAN	298.15	38	0	0	38	34			282000000	117000000	53	52	0	0	92	73	Carbamidomethylation; Acetylation (Protein N-term); Oxidation (M); Deamidation (NQ)	117149	SAFB-like transcription modulator OS=Homo sapiens OX=9606 GN=SLTM PE=1 SV=2
124	41	sp|P29350|PTN6_HUMAN	297.9	64	15	12	58	63	697000	596000	363000000	325000000	40	39	11	8	55	64	Carbamidomethylation; Oxidation (M); Deamidation (NQ)	67561	Tyrosine-protein phosphatase non-receptor type 6 OS=Homo sapiens OX=9606 GN=PTPN6 PE=1 SV=1
163	90	sp|Q9Y608|LRRF2_HUMAN	297.32	36	1	3	31	25	89400	60300	463000000	97000000	39	37	1	1	70	37	Carbamidomethylation; Oxidation (M); Deamidation (NQ)	82171	Leucine-rich repeat flightless-interacting protein 2 OS=Homo sapiens OX=9606 GN=LRRFIP2 PE=1 SV=1
262	67	sp|Q9NXV6|CARF_HUMAN	295.89	56	0	1	49	54		129000	83200000	146000000	29	29	0	1	23	39	Carbamidomethylation; Acetylation (Protein N-term); Oxidation (M); Deamidation (NQ)	61125	CDKN2A-interacting protein OS=Homo sapiens OX=9606 GN=CDKN2AIP PE=1 SV=3
224	69	tr|J3KSW8|J3KSW8_HUMAN	295.62	52	0	0	52	24					39	0	0	0	63	18	Carbamidomethylation; Oxidation (M); Deamidation (NQ)	95929	Myosin phosphatase Rho-interacting protein (Fragment) OS=Homo sapiens OX=9606 GN=MPRIP PE=1 SV=1
137	71	tr|H0YFY6|H0YFY6_HUMAN	294.82	48	4	5	43	47					45	0	5	5	66	63	Oxidation (M)	107418	Nuclear mitotic apparatus protein 1 (Fragment) OS=Homo sapiens OX=9606 GN=NUMA1 PE=1 SV=1
112	270	tr|H3BR70|H3BR70_HUMAN	293.95	57	18	21	53	56					42	0	13	15	67	60	Carbamidomethylation; Acetylation (Protein N-term); Oxidation (M); Deamidation (NQ)	40190	Pyruvate kinase OS=Homo sapiens OX=9606 GN=PKM PE=1 SV=1
205	75	sp|P11940|PABP1_HUMAN	293.13	45	8	8	42	40	202000	137000	135000000	82300000	30	21	4	5	45	41	Carbamidomethylation; Oxidation (M); Deamidation (NQ)	70671	Polyadenylate-binding protein 1 OS=Homo sapiens OX=9606 GN=PABPC1 PE=1 SV=2
130	56	sp|O43390|HNRPR_HUMAN	293.12	45	4	7	42	40		55900	194000000	130000000	33	24	6	5	71	63	Carbamidomethylation; Oxidation (M); Deamidation (NQ)	70943	Heterogeneous nuclear ribonucleoprotein R OS=Homo sapiens OX=9606 GN=HNRNPR PE=1 SV=1
110	119	sp|Q9UN86|G3BP2_HUMAN	291.96	53	3	3	52	51	257000	91600	982000000	612000000	49	41	1	1	92	66	Carbamidomethylation; Acetylation (Protein N-term); Oxidation (M); Deamidation (NQ)	54121	Ras GTPase-activating protein-binding protein 2 OS=Homo sapiens OX=9606 GN=G3BP2 PE=1 SV=2
149	121	sp|Q9UIG0|BAZ1B_HUMAN	291.36	37	1	1	31	31	1530000	51600	55000000	52800000	59	59	2	1	63	71	Carbamidomethylation; Oxidation (M); Deamidation (NQ)	170902	Tyrosine-protein kinase BAZ1B OS=Homo sapiens OX=9606 GN=BAZ1B PE=1 SV=2
184	123	sp|Q9NTI5|PDS5B_HUMAN	288.33	32	2	1	30	19			41100000	16600000	44	27	2	1	61	40	Carbamidomethylation; Oxidation (M); Deamidation (NQ)	164666	Sister chromatid cohesion protein PDS5 homolog B OS=Homo sapiens OX=9606 GN=PDS5B PE=1 SV=1
136	102	sp|Q8WYP5|ELYS_HUMAN	286.97	24	0	0	21	21			81200000	96700000	52	52	0	0	65	71	Carbamidomethylation; Oxidation (M); Deamidation (NQ)	252496	Protein ELYS OS=Homo sapiens OX=9606 GN=AHCTF1 PE=1 SV=3
190	178	sp|Q01831|XPC_HUMAN	286.9	29	0	0	26	28			76000000	73700000	33	33	0	0	47	53	Carbamidomethylation; Oxidation (M); Deamidation (NQ)	105953	DNA repair protein complementing XP-C cells OS=Homo sapiens OX=9606 GN=XPC PE=1 SV=4
155	168	tr|A0A3B3ITZ9|A0A3B3ITZ9_HUMAN	286.07	39	0	0	39	27			176000000	52900000	50	49	0	0	76	47	Oxidation (M); Deamidation (NQ)	103523	Thyroid hormone receptor-associated protein 3 OS=Homo sapiens OX=9606 GN=THRAP3 PE=1 SV=1
155	169	sp|Q9Y2W1|TR150_HUMAN	286.07	37	0	0	37	26			176000000	52900000	50	49	0	0	76	47	Oxidation (M); Deamidation (NQ)	108666	Thyroid hormone receptor-associated protein 3 OS=Homo sapiens OX=9606 GN=THRAP3 PE=1 SV=2
133	111	sp|Q9H307|PININ_HUMAN	285.56	42	0	1	38	40		0	310000000	183000000	46	46	0	1	65	75	Oxidation (M); Deamidation (NQ)	81628	Pinin OS=Homo sapiens OX=9606 GN=PNN PE=1 SV=5
82	129	sp|P02545|LMNA_HUMAN	285.46	60	30	28	53	56			1430000	2650000	50	2	24	23	77	77	Carbamidomethylation; Acetylation (Protein N-term); Oxidation (M); Deamidation (NQ)	74140	Prelamin-A/C OS=Homo sapiens OX=9606 GN=LMNA PE=1 SV=1
91	138	sp|P68363|TBA1B_HUMAN	283.78	53	38	38	53	49					31	0	30	31	63	50	Carbamidomethylation; Oxidation (M); Deamidation (NQ)	50152	Tubulin alpha-1B chain OS=Homo sapiens OX=9606 GN=TUBA1B PE=1 SV=1
93	81	sp|Q9Y3I0|RTCB_HUMAN	282.82	70	25	23	68	62	2430000	2240000	575000000	243000000	42	42	17	16	81	57	Carbamidomethylation; Oxidation (M); Deamidation (NQ)	55210	tRNA-splicing ligase RtcB homolog OS=Homo sapiens OX=9606 GN=RTCB PE=1 SV=1
92	137	sp|Q71U36|TBA1A_HUMAN	282.41	53	35	38	53	49		85300	1730000	1130000	31	1	29	31	63	50	Carbamidomethylation; Oxidation (M); Deamidation (NQ)	50136	Tubulin alpha-1A chain OS=Homo sapiens OX=9606 GN=TUBA1A PE=1 SV=1
246	255	sp|P26368|U2AF2_HUMAN	282.38	51	4	4	51	34	167000	102000	55700000	14000000	29	7	2	2	51	20	Carbamidomethylation; Acetylation (Protein N-term); Oxidation (M); Deamidation (NQ)	53501	Splicing factor U2AF 65 kDa subunit OS=Homo sapiens OX=9606 GN=U2AF2 PE=1 SV=4
193	127	sp|Q9NYF8|BCLF1_HUMAN	282.35	33	0	0	33	25			136000000	28100000	46	45	0	0	60	34	Carbamidomethylation; Oxidation (M)	106122	Bcl-2-associated transcription factor 1 OS=Homo sapiens OX=9606 GN=BCLAF1 PE=1 SV=2
119	118	sp|P17987|TCPA_HUMAN	281.05	62	15	14	61	58	910000	1020000	281000000	241000000	43	40	10	10	64	58	Carbamidomethylation; Acetylation (Protein N-term); Oxidation (M); Deamidation (NQ)	60344	T-complex protein 1 subunit alpha OS=Homo sapiens OX=9606 GN=TCP1 PE=1 SV=1
142	170	sp|P28799|GRN_HUMAN	280.43	38	30	34	18	28	44100000	70500000	16600000	30100000	28	28	42	53	16	22	Carbamidomethylation; Oxidation (M); Deamidation (NQ)	63545	Progranulin OS=Homo sapiens OX=9606 GN=GRN PE=1 SV=2
51	290	sp|P15924|DESP_HUMAN	279.25	27	14	22	18	16	9450000	19100000	43300000	39000000	93	92	63	98	76	76	Carbamidomethylation; Oxidation (M); Deamidation (NQ)	331774	Desmoplakin OS=Homo sapiens OX=9606 GN=DSP PE=1 SV=3
165	187	sp|Q15149|PLEC_HUMAN	278.48	15	1	0	13	8	235000		24100000	9210000	64	64	3	0	76	51	Carbamidomethylation; Deamidation (NQ)	531796	Plectin OS=Homo sapiens OX=9606 GN=PLEC PE=1 SV=3
117	145	sp|Q8WXF1|PSPC1_HUMAN	278.34	57	10	10	57	46	266000	726000	672000000	332000000	42	41	8	7	80	54	Carbamidomethylation; Oxidation (M); Deamidation (NQ)	58744	Paraspeckle component 1 OS=Homo sapiens OX=9606 GN=PSPC1 PE=1 SV=1
21	439	sp|P01857|IGHG1_HUMAN	278.26	54	54	51	26	34	16200000	17100000	3180000	4450000	39	5	226	216	59	60	Carbamidomethylation; Oxidation (M); Deamidation (NQ)	36106	Immunoglobulin heavy constant gamma 1 OS=Homo sapiens OX=9606 GN=IGHG1 PE=1 SV=1
62	254	sp|P22626|ROA2_HUMAN	278	53	50	49	46	50	91300000	78200000	92600000	124000000	25	20	66	78	57	68	Carbamidomethylation; Oxidation (M); Deamidation (NQ)	37430	Heterogeneous nuclear ribonucleoproteins A2/B1 OS=Homo sapiens OX=9606 GN=HNRNPA2B1 PE=1 SV=2
175	189	tr|Q60FE5|Q60FE5_HUMAN	276.21	25	0	0	24	15		131000	30200000	11200000	56	50	0	1	66	43	Carbamidomethylation; Oxidation (M); Deamidation (NQ)	278224	Filamin-A OS=Homo sapiens OX=9606 GN=FLNA PE=1 SV=1
175	190	sp|P21333|FLNA_HUMAN	276.21	25	0	0	24	15		131000	30200000	11200000	56	50	0	1	66	43	Carbamidomethylation; Oxidation (M); Deamidation (NQ)	280737	Filamin-A OS=Homo sapiens OX=9606 GN=FLNA PE=1 SV=4
248	142	tr|H0Y2S9|H0Y2S9_HUMAN	275.94	22	0	0	22	10			2120000		35	7	0	0	56	16	Carbamidomethylation; Oxidation (M); Deamidation (NQ)	203491	Myosin phosphatase Rho-interacting protein (Fragment) OS=Homo sapiens OX=9606 GN=MPRIP PE=1 SV=3
147	108	sp|O00567|NOP56_HUMAN	275.86	66	8	8	56	53	289000	345000	443000000	324000000	50	50	5	4	64	63	Carbamidomethylation; Oxidation (M); Deamidation (NQ)	66050	Nucleolar protein 56 OS=Homo sapiens OX=9606 GN=NOP56 PE=1 SV=4
90	117	tr|Q3BDU5|Q3BDU5_HUMAN	275.36	68	38	34	64	65					43	0	23	21	67	69	Acetylation (Protein N-term); Oxidation (M); Deamidation (NQ)	55638	Prelamin-A/C OS=Homo sapiens OX=9606 GN=LMNA PE=1 SV=1
151	124	sp|O60506|HNRPQ_HUMAN	274.6	45	4	4	41	44			4130000	10300000	32	4	6	4	51	60	Carbamidomethylation; Oxidation (M); Deamidation (NQ)	69603	Heterogeneous nuclear ribonucleoprotein Q OS=Homo sapiens OX=9606 GN=SYNCRIP PE=1 SV=2
199	152	sp|P40227|TCPZ_HUMAN	274.3	45	5	9	45	42	214000	245000	188000000	122000000	34	33	3	6	46	39	Carbamidomethylation; Oxidation (M); Deamidation (NQ)	58024	T-complex protein 1 subunit zeta OS=Homo sapiens OX=9606 GN=CCT6A PE=1 SV=3
261	103	sp|O95425|SVIL_HUMAN	273.69	22	0	0	21	11	0		30600000	4660000	39	39	1	0	42	23	Carbamidomethylation; Oxidation (M)	247744	Supervillin OS=Homo sapiens OX=9606 GN=SVIL PE=1 SV=2
116	228	sp|O60264|SMCA5_HUMAN	272.14	42	0	0	39	40			70700000	54800000	46	43	0	0	80	73	Carbamidomethylation; Acetylation (Protein N-term); Oxidation (M); Deamidation (NQ)	121905	SWI/SNF-related matrix-associated actin-dependent regulator of chromatin subfamily A member 5 OS=Homo sapiens OX=9606 GN=SMARCA5 PE=1 SV=1
305	612	tr|K7ENG2|K7ENG2_HUMAN	272.05	52	3	3	52	45			1980000	437000	23	1	1	1	38	17	Carbamidomethylation; Oxidation (M); Deamidation (NQ)	33902	U2 snRNP auxiliary factor large subunit OS=Homo sapiens OX=9606 GN=U2AF2 PE=1 SV=1
183	109	sp|O43242|PSMD3_HUMAN	272.05	54	3	4	54	52	19000	74200	158000000	141000000	32	32	2	2	54	44	Oxidation (M); Deamidation (NQ)	60978	26S proteasome non-ATPase regulatory subunit 3 OS=Homo sapiens OX=9606 GN=PSMD3 PE=1 SV=2
138	133	sp|P10809|CH60_HUMAN	272.03	49	23	25	47	46	3820000	5760000	111000000	98200000	35	35	19	26	41	44	Carbamidomethylation; Oxidation (M); Deamidation (NQ)	61055	60 kDa heat shock protein mitochondrial OS=Homo sapiens OX=9606 GN=HSPD1 PE=1 SV=2
134	139	sp|P08238|HS90B_HUMAN	271.62	42	19	4	38	39	2090000	88100	55300000	55100000	37	21	15	3	58	63	Carbamidomethylation; Oxidation (M); Deamidation (NQ)	83264	Heat shock protein HSP 90-beta OS=Homo sapiens OX=9606 GN=HSP90AB1 PE=1 SV=4
152	192	sp|Q9ULV4|COR1C_HUMAN	270.81	56	8	9	56	39	89500	949000	518000000	79200000	44	40	4	7	76	35	Carbamidomethylation; Acetylation (Protein N-term); Oxidation (M); Deamidation (NQ)	53249	Coronin-1C OS=Homo sapiens OX=9606 GN=CORO1C PE=1 SV=1
200	231	sp|Q8WWQ0|PHIP_HUMAN	270.37	23	0	0	18	21			80800000	40200000	44	44	0	0	50	53	Carbamidomethylation; Oxidation (M); Deamidation (NQ)	206688	PH-interacting protein OS=Homo sapiens OX=9606 GN=PHIP PE=1 SV=2
213	141	sp|P35251|RFC1_HUMAN	269.85	33	2	0	30	28	12700000		34900000	23100000	38	38	2	0	42	47	Carbamidomethylation; Oxidation (M); Deamidation (NQ)	128254	Replication factor C subunit 1 OS=Homo sapiens OX=9606 GN=RFC1 PE=1 SV=4
48	1424	sp|P10412|H14_HUMAN	269.35	47	46	41	44	40	7530000	19900000	134000000	164000000	27	3	70	71	75	76	Acetylation (Protein N-term); Deamidation (NQ)	21865	Histone H1.4 OS=Homo sapiens OX=9606 GN=HIST1H1E PE=1 SV=2
57	401	sp|Q04695|K1C17_HUMAN	268.9	62	57	59	38	38	3210000	1170000	1940000	829000	44	6	81	92	61	49	Carbamidomethylation; Oxidation (M); Deamidation (NQ)	48106	Keratin type I cytoskeletal 17 OS=Homo sapiens OX=9606 GN=KRT17 PE=1 SV=2
145	219	sp|Q86WJ1|CHD1L_HUMAN	268.84	40	0	0	37	39			123000000	87100000	45	45	0	0	61	69	Carbamidomethylation; Oxidation (M)	101000	Chromodomain-helicase-DNA-binding protein 1-like OS=Homo sapiens OX=9606 GN=CHD1L PE=1 SV=3
43	1176	sp|P16401|H15_HUMAN	268.37	45	45	40	42	38	158000000	150000000	354000000	387000000	25	16	81	88	77	74	Acetylation (Protein N-term); Deamidation (NQ)	22580	Histone H1.5 OS=Homo sapiens OX=9606 GN=HIST1H1B PE=1 SV=3
148	165	sp|Q92499|DDX1_HUMAN	268.26	49	0	0	46	46			117000000	143000000	39	39	0	0	59	67	Carbamidomethylation; Oxidation (M); Deamidation (NQ)	82432	ATP-dependent RNA helicase DDX1 OS=Homo sapiens OX=9606 GN=DDX1 PE=1 SV=2
156	561	sp|Q92734|TFG_HUMAN	268.05	51	16	18	51	48	1450000	1440000	450000000	242000000	25	25	10	5	62	43	Acetylation (Protein N-term); Oxidation (M); Deamidation (NQ)	43448	Protein TFG OS=Homo sapiens OX=9606 GN=TFG PE=1 SV=2
50	1369	sp|P16403|H12_HUMAN	267.88	52	47	43	45	45	12100000	11200000	67200000	76100000	28	4	73	73	70	76	Acetylation (Protein N-term); Deamidation (NQ)	21365	Histone H1.2 OS=Homo sapiens OX=9606 GN=HIST1H1C PE=1 SV=2
201	177	sp|Q9UQE7|SMC3_HUMAN	267.78	38	1	1	35	28	0		42900000	15200000	50	49	1	1	53	42	Carbamidomethylation; Oxidation (M); Deamidation (NQ)	141541	Structural maintenance of chromosomes protein 3 OS=Homo sapiens OX=9606 GN=SMC3 PE=1 SV=2
182	113	sp|Q96PK6|RBM14_HUMAN	267.67	45	7	4	44	39	148000	131000	176000000	175000000	34	34	5	2	50	53	Carbamidomethylation; Oxidation (M); Deamidation (NQ)	69492	RNA-binding protein 14 OS=Homo sapiens OX=9606 GN=RBM14 PE=1 SV=2
123	164	sp|Q12906|ILF3_HUMAN	267.51	44	2	1	34	39	62100	21000	129000000	133000000	35	29	2	2	73	70	Carbamidomethylation; Oxidation (M); Deamidation (NQ)	95339	Interleukin enhancer-binding factor 3 OS=Homo sapiens OX=9606 GN=ILF3 PE=1 SV=3
118	213	sp|P19338|NUCL_HUMAN	267.19	37	2	6	37	35	239000	598000	334000000	136000000	40	40	3	6	80	63	Deamidation (NQ)	76615	Nucleolin OS=Homo sapiens OX=9606 GN=NCL PE=1 SV=3
203	185	sp|P53621|COPA_HUMAN	267.19	29	0	0	27	21			44900000	16100000	38	37	0	0	50	42	Carbamidomethylation; Oxidation (M); Deamidation (NQ)	138345	Coatomer subunit alpha OS=Homo sapiens OX=9606 GN=COPA PE=1 SV=2
160	193	sp|Q9NR30|DDX21_HUMAN	267.03	44	1	5	38	37	19100	78900	70600000	45900000	36	32	1	1	58	54	Carbamidomethylation; Oxidation (M); Deamidation (NQ)	87344	Nucleolar RNA helicase 2 OS=Homo sapiens OX=9606 GN=DDX21 PE=1 SV=5
131	183	sp|P05164|PERM_HUMAN	266.83	42	4	6	36	42	157000	305000	185000000	268000000	36	36	4	6	58	70	Carbamidomethylation; Oxidation (M); Deamidation (NQ)	83869	Myeloperoxidase OS=Homo sapiens OX=9606 GN=MPO PE=1 SV=1
120	159	tr|Q5TCI8|Q5TCI8_HUMAN	264.92	59	26	26	57	56					36	0	13	17	60	54	Carbamidomethylation; Oxidation (M); Deamidation (NQ)	55762	Prelamin-A/C OS=Homo sapiens OX=9606 GN=LMNA PE=1 SV=1
164	202	tr|B7Z645|B7Z645_HUMAN	264.04	49	6	6	46	49			2930000	5810000	27	1	6	4	46	53	Carbamidomethylation; Oxidation (M); Deamidation (NQ)	52046	Synaptotagmin binding cytoplasmic RNA interacting protein isoform CRA_b OS=Homo sapiens OX=9606 GN=SYNCRIP PE=1 SV=1
377	316	sp|Q5D862|FILA2_HUMAN	264.01	12	5	11	3	3	1290000	5190000	5070000	2390000	18	18	8	24	6	5	Carbamidomethylation; Deamidation (NQ)	248072	Filaggrin-2 OS=Homo sapiens OX=9606 GN=FLG2 PE=1 SV=1
132	212	sp|P68366|TBA4A_HUMAN	262.72	48	28	26	48	41			2620000	1660000	29	1	26	25	51	40	Carbamidomethylation; Oxidation (M); Deamidation (NQ)	49924	Tubulin alpha-4A chain OS=Homo sapiens OX=9606 GN=TUBA4A PE=1 SV=1
94	279	sp|O75367|H2AY_HUMAN	262.63	65	49	47	49	50	29300000	25000000	89100000	102000000	26	22	39	39	39	47	Carbamidomethylation; Oxidation (M); Deamidation (NQ)	39617	Core histone macro-H2A.1 OS=Homo sapiens OX=9606 GN=H2AFY PE=1 SV=4
166	140	sp|O43143|DHX15_HUMAN	261.88	37	0	1	36	31		0	139000000	79400000	36	36	0	1	59	50	Carbamidomethylation; Oxidation (M); Deamidation (NQ)	90933	Pre-mRNA-splicing factor ATP-dependent RNA helicase DHX15 OS=Homo sapiens OX=9606 GN=DHX15 PE=1 SV=2
125	271	sp|P11388|TOP2A_HUMAN	261.75	30	0	0	26	26			16800000	8810000	58	25	0	0	69	74	Carbamidomethylation; Oxidation (M); Deamidation (NQ)	174384	DNA topoisomerase 2-alpha OS=Homo sapiens OX=9606 GN=TOP2A PE=1 SV=3
189	161	sp|P49368|TCPG_HUMAN	261.36	52	1	3	50	51	19700	96800	149000000	151000000	36	36	1	2	49	42	Carbamidomethylation; Acetylation (Protein N-term); Oxidation (M); Deamidation (NQ)	60534	T-complex protein 1 subunit gamma OS=Homo sapiens OX=9606 GN=CCT3 PE=1 SV=4
107	569	sp|P51991|ROA3_HUMAN	261.33	39	35	29	35	34	20300000	14600000	29900000	39600000	24	21	50	42	33	36	Carbamidomethylation; Acetylation (Protein N-term); Oxidation (M); Deamidation (NQ)	39595	Heterogeneous nuclear ribonucleoprotein A3 OS=Homo sapiens OX=9606 GN=HNRNPA3 PE=1 SV=2
54	1169	sp|P16402|H13_HUMAN	261.24	49	42	37	43	46	11200000	11200000	27800000	32200000	29	6	67	70	69	75	Acetylation (Protein N-term); Deamidation (NQ)	22350	Histone H1.3 OS=Homo sapiens OX=9606 GN=HIST1H1D PE=1 SV=2
98	110	sp|P11142|HSP7C_HUMAN	261.13	43	34	31	40	43	3260000	941000	23800000	32800000	32	12	37	33	55	50	Carbamidomethylation; Oxidation (M); Deamidation (NQ)	70898	Heat shock cognate 71 kDa protein OS=Homo sapiens OX=9606 GN=HSPA8 PE=1 SV=1
153	131	tr|A0A087X0X3|A0A087X0X3_HUMAN	259.1	55	7	11	43	49			16000000	20100000	42	9	6	11	56	61	Carbamidomethylation; Acetylation (Protein N-term); Oxidation (M); Deamidation (NQ)	77570	Heterogeneous nuclear ribonucleoprotein M OS=Homo sapiens OX=9606 GN=HNRNPM PE=1 SV=1
153	132	sp|P52272|HNRPM_HUMAN	259.1	55	7	11	43	49			16000000	20100000	42	9	6	11	56	61	Carbamidomethylation; Acetylation (Protein N-term); Oxidation (M); Deamidation (NQ)	77516	Heterogeneous nuclear ribonucleoprotein M OS=Homo sapiens OX=9606 GN=HNRNPM PE=1 SV=3
194	1175	sp|Q01844|EWS_HUMAN	257.26	27	12	8	23	21	3110000	2790000	514000000	399000000	19	19	7	5	47	36	Carbamidomethylation; Acetylation (Protein N-term); Oxidation (M); Deamidation (NQ)	68478	RNA-binding protein EWS OS=Homo sapiens OX=9606 GN=EWSR1 PE=1 SV=1
194	1207	tr|B0QYK0|B0QYK0_HUMAN	257.26	24	13	9	21	22	3110000	2790000	514000000	399000000	18	18	7	5	46	36	Carbamidomethylation; Acetylation (Protein N-term); Oxidation (M); Deamidation (NQ)	64929	RNA-binding protein EWS OS=Homo sapiens OX=9606 GN=EWSR1 PE=1 SV=1
298	211	sp|P51608|MECP2_HUMAN	257.22	46	0	0	46	42			27300000	36700000	22	15	0	0	28	27	Oxidation (M)	52441	Methyl-CpG-binding protein 2 OS=Homo sapiens OX=9606 GN=MECP2 PE=1 SV=1
30	882	sp|P01861|IGHG4_HUMAN	257.19	47	39	38	24	35	118000	1740000	1920000	13200000	33	9	181	164	59	62	Carbamidomethylation; Oxidation (M); Deamidation (NQ)	35941	Immunoglobulin heavy constant gamma 4 OS=Homo sapiens OX=9606 GN=IGHG4 PE=1 SV=1
30	885	tr|A0A286YFJ8|A0A286YFJ8_HUMAN	257.19	39	33	31	20	29	118000	1740000	1920000	13200000	33	9	181	164	59	62	Carbamidomethylation; Oxidation (M); Deamidation (NQ)	43832	Immunoglobulin heavy constant gamma 4 (Fragment) OS=Homo sapiens OX=9606 GN=IGHG4 PE=1 SV=1
150	310	sp|Q13045|FLII_HUMAN	256.69	30	0	1	28	22		105000	90000000	21500000	43	21	0	1	77	58	Carbamidomethylation; Acetylation (Protein N-term); Oxidation (M); Deamidation (NQ)	144751	Protein flightless-1 homolog OS=Homo sapiens OX=9606 GN=FLII PE=1 SV=2
37	347	sp|P68032|ACTC_HUMAN	254.88	54	43	50	47	44	14100000	11400000	12900000	8980000	38	7	105	99	85	77	Carbamidomethylation; Oxidation (M); Deamidation (NQ)	42019	Actin alpha cardiac muscle 1 OS=Homo sapiens OX=9606 GN=ACTC1 PE=1 SV=1
37	348	sp|P68133|ACTS_HUMAN	254.88	54	43	50	47	44	14100000	11400000	12900000	8980000	38	7	105	99	85	77	Carbamidomethylation; Oxidation (M); Deamidation (NQ)	42051	Actin alpha skeletal muscle OS=Homo sapiens OX=9606 GN=ACTA1 PE=1 SV=1
195	265	sp|Q14683|SMC1A_HUMAN	253.66	35	0	0	34	25			60600000	17200000	51	51	0	0	59	36	Carbamidomethylation; Oxidation (M); Deamidation (NQ)	143233	Structural maintenance of chromosomes protein 1A OS=Homo sapiens OX=9606 GN=SMC1A PE=1 SV=2
111	232	sp|P35749|MYH11_HUMAN	252.83	15	2	2	13	13		5790000	829000		49	2	4	3	85	70	Carbamidomethylation; Oxidation (M); Deamidation (NQ)	227337	Myosin-11 OS=Homo sapiens OX=9606 GN=MYH11 PE=1 SV=3
174	285	sp|Q13576|IQGA2_HUMAN	252.81	26	0	0	25	18			40700000	13400000	47	42	0	0	61	46	Carbamidomethylation; Oxidation (M)	180577	Ras GTPase-activating-like protein IQGAP2 OS=Homo sapiens OX=9606 GN=IQGAP2 PE=1 SV=4
259	199	sp|Q13283|G3BP1_HUMAN	251.84	59	0	2	25	58		43500	10000000	160000000	27	19	0	1	20	47	Acetylation (Protein N-term); Oxidation (M); Deamidation (NQ)	52164	Ras GTPase-activating protein-binding protein 1 OS=Homo sapiens OX=9606 GN=G3BP1 PE=1 SV=1
139	303	sp|Q8IXT5|RB12B_HUMAN	251.41	36	0	0	30	36			84200000	99200000	47	47	0	0	60	81	Carbamidomethylation; Oxidation (M); Deamidation (NQ)	118103	RNA-binding protein 12B OS=Homo sapiens OX=9606 GN=RBM12B PE=1 SV=2
188	163	sp|P07948|LYN_HUMAN	251.27	55	3	2	52	51		25900	110000000	87800000	31	25	2	1	52	45	Carbamidomethylation; Oxidation (M); Deamidation (NQ)	58574	Tyrosine-protein kinase Lyn OS=Homo sapiens OX=9606 GN=LYN PE=1 SV=3
181	130	sp|P50991|TCPD_HUMAN	251.19	60	8	8	56	47	2880000	387000	122000000	76400000	38	34	4	5	58	49	Carbamidomethylation; Oxidation (M); Deamidation (NQ)	57924	T-complex protein 1 subunit delta OS=Homo sapiens OX=9606 GN=CCT4 PE=1 SV=4
291	195	sp|O14974|MYPT1_HUMAN	251.09	29	0	0	29	12			15200000	1480000	33	9	0	0	44	12	Carbamidomethylation; Oxidation (M); Deamidation (NQ)	115281	Protein phosphatase 1 regulatory subunit 12A OS=Homo sapiens OX=9606 GN=PPP1R12A PE=1 SV=1
217	217	sp|Q8TAQ2|SMRC2_HUMAN	250.23	25	0	0	23	22			1010000	1200000	33	1	0	0	50	44	Carbamidomethylation; Oxidation (M); Deamidation (NQ)	132879	SWI/SNF complex subunit SMARCC2 OS=Homo sapiens OX=9606 GN=SMARCC2 PE=1 SV=1
171	200	sp|P17480|UBF1_HUMAN	249.93	35	1	0	34	30	172000		107000000	53400000	34	33	1	0	67	42	Oxidation (M); Deamidation (NQ)	89406	Nucleolar transcription factor 1 OS=Homo sapiens OX=9606 GN=UBTF PE=1 SV=1
209	236	sp|O94832|MYO1D_HUMAN	248.89	42	0	0	42	23			83100000	14000000	44	41	0	0	63	32	Carbamidomethylation; Acetylation (Protein N-term); Oxidation (M); Deamidation (NQ)	116202	Unconventional myosin-Id OS=Homo sapiens OX=9606 GN=MYO1D PE=1 SV=2
179	149	sp|P0DMV8|HS71A_HUMAN	248.62	40	9	21	37	39		100000	16100000	21600000	29	11	8	17	39	40	Carbamidomethylation; Oxidation (M); Deamidation (NQ)	70052	Heat shock 70 kDa protein 1A OS=Homo sapiens OX=9606 GN=HSPA1A PE=1 SV=1
179	150	sp|P0DMV9|HS71B_HUMAN	248.62	40	9	21	37	39		100000	16100000	21600000	29	11	8	17	39	40	Carbamidomethylation; Oxidation (M); Deamidation (NQ)	70052	Heat shock 70 kDa protein 1B OS=Homo sapiens OX=9606 GN=HSPA1B PE=1 SV=1
179	151	tr|A0A0G2JIW1|A0A0G2JIW1_HUMAN	248.62	40	9	21	37	38		100000	16100000	21600000	29	11	8	17	39	40	Carbamidomethylation; Oxidation (M); Deamidation (NQ)	70109	Heat shock 70 kDa protein 1B OS=Homo sapiens OX=9606 GN=HSPA1B PE=1 SV=1
36	521	sp|P01859|IGHG2_HUMAN	248.07	56	49	52	19	25	9140000	11400000	0		33	5	165	147	42	45	Carbamidomethylation; Oxidation (M); Deamidation (NQ)	35901	Immunoglobulin heavy constant gamma 2 OS=Homo sapiens OX=9606 GN=IGHG2 PE=1 SV=2
212	377	tr|G3V3B0|G3V3B0_HUMAN	247.28	36	0	0	31	33			1920000	258000	31	2	0	0	51	41	Carbamidomethylation; Deamidation (NQ)	67495	Apoptotic chromatin condensation inducer in the nucleus OS=Homo sapiens OX=9606 GN=ACIN1 PE=1 SV=1
218	351	sp|Q92878|RAD50_HUMAN	247.04	36	0	1	36	17		157000	38400000	8630000	52	52	0	1	59	28	Carbamidomethylation; Oxidation (M); Deamidation (NQ)	153892	DNA repair protein RAD50 OS=Homo sapiens OX=9606 GN=RAD50 PE=1 SV=1
267	182	sp|P04843|RPN1_HUMAN	245.68	52	3	3	36	50	416000	116000	36100000	182000000	33	33	2	2	18	39	Carbamidomethylation; Oxidation (M); Deamidation (NQ)	68569	Dolichyl-diphosphooligosaccharide--protein glycosyltransferase subunit 1 OS=Homo sapiens OX=9606 GN=RPN1 PE=1 SV=1
185	266	sp|Q5SSJ5|HP1B3_HUMAN	245.53	38	2	3	36	36	0	175000	122000000	162000000	29	29	1	3	41	51	Carbamidomethylation; Acetylation (Protein N-term); Oxidation (M); Deamidation (NQ)	61207	Heterochromatin protein 1-binding protein 3 OS=Homo sapiens OX=9606 GN=HP1BP3 PE=1 SV=1
41	1886	sp|P62805|H4_HUMAN	245.13	61	60	60	56	57	443000000	425000000	1030000000	956000000	26	26	75	87	79	78	Oxidation (M); Deamidation (NQ)	11367	Histone H4 OS=Homo sapiens OX=9606 GN=HIST1H4A PE=1 SV=2
154	216	sp|Q08945|SSRP1_HUMAN	245.1	37	0	0	36	37			142000000	104000000	34	34	0	0	61	61	Carbamidomethylation; Acetylation (Protein N-term); Oxidation (M); Deamidation (NQ)	81075	FACT complex subunit SSRP1 OS=Homo sapiens OX=9606 GN=SSRP1 PE=1 SV=1
250	175	sp|P13796|PLSL_HUMAN	244.73	46	6	9	39	44	272000	527000	53100000	99700000	29	29	3	6	29	34	Carbamidomethylation; Oxidation (M); Deamidation (NQ)	70289	Plastin-2 OS=Homo sapiens OX=9606 GN=LCP1 PE=1 SV=6
222	220	sp|Q9H0A0|NAT10_HUMAN	244.02	25	0	0	24	23			43000000	23400000	30	30	0	0	41	41	Carbamidomethylation; Oxidation (M); Deamidation (NQ)	115730	RNA cytidine acetyltransferase OS=Homo sapiens OX=9606 GN=NAT10 PE=1 SV=2
235	167	sp|Q49A26|GLYR1_HUMAN	243.33	54	2	1	46	47	0		71900000	90100000	32	31	1	1	34	39	Carbamidomethylation; Oxidation (M); Deamidation (NQ)	60547	Putative oxidoreductase GLYR1 OS=Homo sapiens OX=9606 GN=GLYR1 PE=1 SV=4
300	293	sp|P11413|G6PD_HUMAN	242.93	40	5	3	39	35	132000	86500	56100000	31600000	25	25	3	2	29	21	Carbamidomethylation; Acetylation (Protein N-term); Oxidation (M)	59257	Glucose-6-phosphate 1-dehydrogenase OS=Homo sapiens OX=9606 GN=G6PD PE=1 SV=4
278	230	sp|O43148|MCES_HUMAN	242.57	43	0	2	42	41		76500	134000000	89100000	26	26	0	1	29	27	Carbamidomethylation; Oxidation (M)	54844	mRNA cap guanine-N7 methyltransferase OS=Homo sapiens OX=9606 GN=RNMT PE=1 SV=1
249	191	sp|O14497|ARI1A_HUMAN	242.04	19	0	0	13	18			14700000	19300000	32	30	0	0	32	40	Carbamidomethylation; Acetylation (Protein N-term); Oxidation (M)	242042	AT-rich interactive domain-containing protein 1A OS=Homo sapiens OX=9606 GN=ARID1A PE=1 SV=3
320	500	tr|B1ANR0|B1ANR0_HUMAN	241.78	27	3	2	27	22			12100000	6710000	19	10	1	1	26	27	Carbamidomethylation; Oxidation (M); Deamidation (NQ)	67971	Polyadenylate-binding protein OS=Homo sapiens OX=9606 GN=PABPC4 PE=1 SV=1
320	501	sp|Q13310|PABP4_HUMAN	241.78	25	3	2	25	21			12100000	6710000	19	10	1	1	26	27	Carbamidomethylation; Oxidation (M); Deamidation (NQ)	70783	Polyadenylate-binding protein 4 OS=Homo sapiens OX=9606 GN=PABPC4 PE=1 SV=1
252	258	sp|Q16643|DREB_HUMAN	241.75	42	0	0	40	22			95000000	27900000	31	30	0	0	49	24	Carbamidomethylation; Acetylation (Protein N-term); Oxidation (M); Deamidation (NQ)	71429	Drebrin OS=Homo sapiens OX=9606 GN=DBN1 PE=1 SV=4
237	229	sp|Q9UKV8|AGO2_HUMAN	240.96	35	0	0	29	33			26900000	28300000	26	19	0	0	38	42	Carbamidomethylation; Oxidation (M)	97208	Protein argonaute-2 OS=Homo sapiens OX=9606 GN=AGO2 PE=1 SV=3
162	342	sp|P19013|K2C4_HUMAN	240.89	53	49	17	18	13	21400000		874000	798000	41	17	52	28	25	17	Oxidation (M); Deamidation (NQ)	57285	Keratin type II cytoskeletal 4 OS=Homo sapiens OX=9606 GN=KRT4 PE=1 SV=4
334	197	sp|Q9HCC0|MCCB_HUMAN	240.75	44	2	5	43	35	25600	310000	45500000	26100000	21	21	1	5	23	19	Carbamidomethylation; Oxidation (M); Deamidation (NQ)	61333	Methylcrotonoyl-CoA carboxylase beta chain mitochondrial OS=Homo sapiens OX=9606 GN=MCCC2 PE=1 SV=1
256	234	sp|Q8NC51|PAIRB_HUMAN	240.13	50	16	25	48	28	1240000	1030000	110000000	18300000	24	24	7	10	34	16	Carbamidomethylation; Oxidation (M); Deamidation (NQ)	44965	Plasminogen activator inhibitor 1 RNA-binding protein OS=Homo sapiens OX=9606 GN=SERBP1 PE=1 SV=2
177	252	sp|Q02413|DSG1_HUMAN	240.06	27	19	21	18	17	7380000	8560000	12100000	8590000	25	25	29	35	19	25	Carbamidomethylation; Oxidation (M)	113748	Desmoglein-1 OS=Homo sapiens OX=9606 GN=DSG1 PE=1 SV=2
198	334	sp|P31146|COR1A_HUMAN	239.61	48	33	35	43	42	5490000	6650000	94800000	50900000	29	27	20	21	28	26	Carbamidomethylation; Oxidation (M)	51026	Coronin-1A OS=Homo sapiens OX=9606 GN=CORO1A PE=1 SV=4
202	221	sp|Q15029|U5S1_HUMAN	239.28	32	1	0	31	31			57000000	30200000	31	30	1	0	52	40	Carbamidomethylation; Oxidation (M)	109436	116 kDa U5 small nuclear ribonucleoprotein component OS=Homo sapiens OX=9606 GN=EFTUD2 PE=1 SV=1
204	291	sp|P46940|IQGA1_HUMAN	238.82	23	0	0	22	19			31900000	10900000	42	37	0	0	56	39	Oxidation (M); Deamidation (NQ)	189251	Ras GTPase-activating-like protein IQGAP1 OS=Homo sapiens OX=9606 GN=IQGAP1 PE=1 SV=1
299	438	sp|Q9Y6K1|DNM3A_HUMAN	238.74	28	0	0	27	20			18700000	6060000	25	22	0	0	29	24	Carbamidomethylation; Oxidation (M)	101858	DNA (cytosine-5)-methyltransferase 3A OS=Homo sapiens OX=9606 GN=DNMT3A PE=1 SV=4
355	337	sp|Q13177|PAK2_HUMAN	238.21	46	0	2	43	35		67200	62500000	37400000	21	21	0	1	26	21	Acetylation (Protein N-term); Oxidation (M); Deamidation (NQ)	58043	Serine/threonine-protein kinase PAK 2 OS=Homo sapiens OX=9606 GN=PAK2 PE=1 SV=3
161	241	tr|A0A0D9SFB3|A0A0D9SFB3_HUMAN	238.09	40	10	5	38	35	93600	53900	91700000	118000000	30	26	9	7	41	53	Carbamidomethylation; Oxidation (M); Deamidation (NQ)	70840	ATP-dependent RNA helicase DDX3X OS=Homo sapiens OX=9606 GN=DDX3X PE=1 SV=1
161	242	tr|A0A2R8YF78|A0A2R8YF78_HUMAN	238.09	40	10	5	38	35	93600	53900	91700000	118000000	30	26	9	7	41	53	Carbamidomethylation; Oxidation (M); Deamidation (NQ)	70940	ATP-dependent RNA helicase DDX3X OS=Homo sapiens OX=9606 GN=DDX3X PE=1 SV=1
161	243	tr|A0A2R8YCW1|A0A2R8YCW1_HUMAN	238.09	40	10	5	37	35	93600	53900	91700000	118000000	30	26	9	7	41	53	Carbamidomethylation; Oxidation (M); Deamidation (NQ)	71694	ATP-dependent RNA helicase DDX3X OS=Homo sapiens OX=9606 GN=DDX3X PE=1 SV=1
161	244	tr|A0A0D9SG12|A0A0D9SG12_HUMAN	238.09	40	10	5	37	35	93600	53900	91700000	118000000	30	26	9	7	41	53	Carbamidomethylation; Oxidation (M); Deamidation (NQ)	71541	ATP-dependent RNA helicase DDX3X OS=Homo sapiens OX=9606 GN=DDX3X PE=1 SV=1
161	245	tr|A0A2R8Y5G6|A0A2R8Y5G6_HUMAN	238.09	41	11	5	39	36	93600	53900	91700000	118000000	30	26	9	7	41	53	Carbamidomethylation; Oxidation (M); Deamidation (NQ)	69048	ATP-dependent RNA helicase DDX3X OS=Homo sapiens OX=9606 GN=DDX3X PE=1 SV=1
161	246	tr|A0A2R8YFR4|A0A2R8YFR4_HUMAN	238.09	39	10	5	37	34	93600	53900	91700000	118000000	30	26	9	7	41	53	Carbamidomethylation; Oxidation (M); Deamidation (NQ)	73127	ATP-dependent RNA helicase DDX3X OS=Homo sapiens OX=9606 GN=DDX3X PE=1 SV=1
161	247	tr|A0A2R8YFS5|A0A2R8YFS5_HUMAN	238.09	39	10	5	36	34	93600	53900	91700000	118000000	30	26	9	7	41	53	Carbamidomethylation; Oxidation (M); Deamidation (NQ)	73156	ATP-dependent RNA helicase DDX3X OS=Homo sapiens OX=9606 GN=DDX3X PE=1 SV=1
161	248	tr|A0A2U3TZJ9|A0A2U3TZJ9_HUMAN	238.09	39	10	5	36	34	93600	53900	91700000	118000000	30	26	9	7	41	53	Carbamidomethylation; Oxidation (M); Deamidation (NQ)	73215	ATP-dependent RNA helicase DDX3X OS=Homo sapiens OX=9606 GN=DDX3X PE=1 SV=1
161	249	tr|A0A2R8Y4A4|A0A2R8Y4A4_HUMAN	238.09	39	10	5	36	34	93600	53900	91700000	118000000	30	26	9	7	41	53	Carbamidomethylation; Oxidation (M); Deamidation (NQ)	73244	ATP-dependent RNA helicase DDX3X OS=Homo sapiens OX=9606 GN=DDX3X PE=1 SV=1
161	250	sp|O00571|DDX3X_HUMAN	238.09	39	10	5	36	34	93600	53900	91700000	118000000	30	26	9	7	41	53	Carbamidomethylation; Oxidation (M); Deamidation (NQ)	73244	ATP-dependent RNA helicase DDX3X OS=Homo sapiens OX=9606 GN=DDX3X PE=1 SV=3
161	256	tr|A0A2R8Y645|A0A2R8Y645_HUMAN	238.09	36	9	4	34	32	93600	53900	91700000	118000000	30	26	9	7	41	53	Carbamidomethylation; Oxidation (M); Deamidation (NQ)	79475	ATP-dependent RNA helicase DDX3X OS=Homo sapiens OX=9606 GN=DDX3X PE=1 SV=1
161	257	tr|A0A0D9SF53|A0A0D9SF53_HUMAN	238.09	35	9	4	33	31	93600	53900	91700000	118000000	30	26	9	7	41	53	Carbamidomethylation; Oxidation (M); Deamidation (NQ)	81477	ATP-dependent RNA helicase DDX3X OS=Homo sapiens OX=9606 GN=DDX3X PE=1 SV=1
88	450	sp|P13646|K1C13_HUMAN	237.93	46	46	11	11	15					28	0	62	45	49	34	Carbamidomethylation; Oxidation (M); Deamidation (NQ)	49588	Keratin type I cytoskeletal 13 OS=Homo sapiens OX=9606 GN=KRT13 PE=1 SV=4
234	225	sp|Q8WUM4|PDC6I_HUMAN	237.75	37	0	0	36	30			27900000	15800000	33	33	0	0	39	35	Carbamidomethylation; Acetylation (Protein N-term); Oxidation (M); Deamidation (NQ)	96023	Programmed cell death 6-interacting protein OS=Homo sapiens OX=9606 GN=PDCD6IP PE=1 SV=1
288	448	tr|H0Y4R1|H0Y4R1_HUMAN	237.26	45	17	10	38	42	478000	444000	86700000	81700000	22	18	7	5	25	22	Carbamidomethylation; Oxidation (M); Deamidation (NQ)	51077	Inosine-5'-monophosphate dehydrogenase 2 (Fragment) OS=Homo sapiens OX=9606 GN=IMPDH2 PE=1 SV=1
288	451	sp|P12268|IMDH2_HUMAN	237.26	41	16	9	35	39	478000	444000	86700000	81700000	22	18	7	5	25	22	Carbamidomethylation; Oxidation (M); Deamidation (NQ)	55805	Inosine-5'-monophosphate dehydrogenase 2 OS=Homo sapiens OX=9606 GN=IMPDH2 PE=1 SV=2
293	319	sp|Q9BVP2|GNL3_HUMAN	236.04	39	2	2	39	35	39300	46300	77400000	60100000	22	21	1	1	30	22	Carbamidomethylation; Oxidation (M)	61993	Guanine nucleotide-binding protein-like 3 OS=Homo sapiens OX=9606 GN=GNL3 PE=1 SV=2
275	267	sp|P12814|ACTN1_HUMAN	235.76	32	0	0	32	17			17000000	2530000	28	10	0	0	40	19	Carbamidomethylation; Oxidation (M); Deamidation (NQ)	103058	Alpha-actinin-1 OS=Homo sapiens OX=9606 GN=ACTN1 PE=1 SV=2
330	299	sp|Q9Y262|EIF3L_HUMAN	235.69	43	0	1	38	33		9440	13300000	11400000	24	24	0	1	27	23	Carbamidomethylation	66727	Eukaryotic translation initiation factor 3 subunit L OS=Homo sapiens OX=9606 GN=EIF3L PE=1 SV=1
330	300	tr|B0QY89|B0QY89_HUMAN	235.69	40	0	1	36	30		9440	13300000	11400000	24	24	0	1	27	23	Carbamidomethylation	70902	Eukaryotic translation initiation factor 3 subunit L OS=Homo sapiens OX=9606 GN=EIF3L PE=1 SV=1
158	214	sp|P07900|HS90A_HUMAN	235.16	33	11	2	30	33	409000		15700000	21600000	28	14	10	1	47	57	Oxidation (M); Deamidation (NQ)	84660	Heat shock protein HSP 90-alpha OS=Homo sapiens OX=9606 GN=HSP90AA1 PE=1 SV=5
121	1516	sp|Q9BTM1|H2AJ_HUMAN	234.74	67	57	67	46	36					23	0	34	31	42	47	Deamidation (NQ)	14019	Histone H2A.J OS=Homo sapiens OX=9606 GN=H2AFJ PE=1 SV=1
121	1522	sp|Q99878|H2A1J_HUMAN	234.74	67	57	67	46	36					23	0	34	31	42	47	Deamidation (NQ)	13936	Histone H2A type 1-J OS=Homo sapiens OX=9606 GN=HIST1H2AJ PE=1 SV=3
121	1523	sp|Q96KK5|H2A1H_HUMAN	234.74	67	57	67	46	36					23	0	34	31	42	47	Deamidation (NQ)	13906	Histone H2A type 1-H OS=Homo sapiens OX=9606 GN=HIST1H2AH PE=1 SV=3
121	1524	sp|P0C0S8|H2A1_HUMAN	234.74	66	56	66	45	35					23	0	34	31	42	47	Deamidation (NQ)	14091	Histone H2A type 1 OS=Homo sapiens OX=9606 GN=HIST1H2AG PE=1 SV=2
215	273	tr|F8VXC8|F8VXC8_HUMAN	234.73	23	0	0	22	21			156000	84000	33	1	0	0	50	45	Carbamidomethylation; Oxidation (M); Deamidation (NQ)	136184	SWI/SNF complex subunit SMARCC2 OS=Homo sapiens OX=9606 GN=SMARCC2 PE=1 SV=1
28	530	sp|P01860|IGHG3_HUMAN	234.44	43	38	43	19	22	441000	273000			31	3	173	189	51	49	Carbamidomethylation; Oxidation (M)	41287	Immunoglobulin heavy constant gamma 3 OS=Homo sapiens OX=9606 GN=IGHG3 PE=1 SV=2
247	287	sp|A6NHR9|SMHD1_HUMAN	234.21	21	0	0	20	13			28500000	9860000	43	43	0	0	49	27	Carbamidomethylation; Oxidation (M); Deamidation (NQ)	226372	Structural maintenance of chromosomes flexible hinge domain-containing protein 1 OS=Homo sapiens OX=9606 GN=SMCHD1 PE=1 SV=2
122	1566	sp|Q16777|H2A2C_HUMAN	234.2	67	57	57	46	36	59700		163000		23	1	34	30	42	47	Deamidation (NQ)	13988	Histone H2A type 2-C OS=Homo sapiens OX=9606 GN=HIST2H2AC PE=1 SV=4
122	1567	sp|Q6FI13|H2A2A_HUMAN	234.2	66	56	56	45	35	59700		163000		23	1	34	30	42	47	Deamidation (NQ)	14095	Histone H2A type 2-A OS=Homo sapiens OX=9606 GN=HIST2H2AA3 PE=1 SV=3
255	261	sp|Q9P258|RCC2_HUMAN	233.44	44	10	7	44	30	388000	391000	76800000	24100000	23	23	5	4	39	23	Carbamidomethylation; Oxidation (M); Deamidation (NQ)	56085	Protein RCC2 OS=Homo sapiens OX=9606 GN=RCC2 PE=1 SV=2
280	416	sp|Q9H6F5|CCD86_HUMAN	232.93	49	0	0	46	49			159000000	243000000	20	19	0	0	25	34	Acetylation (Protein N-term); Oxidation (M); Deamidation (NQ)	40236	Coiled-coil domain-containing protein 86 OS=Homo sapiens OX=9606 GN=CCDC86 PE=1 SV=1
372	409	sp|P04844|RPN2_HUMAN	231.63	33	1	4	30	31	115000	81700	46000000	41900000	19	19	1	2	20	20	Carbamidomethylation; Oxidation (M)	69284	Dolichyl-diphosphooligosaccharide--protein glycosyltransferase subunit 2 OS=Homo sapiens OX=9606 GN=RPN2 PE=1 SV=3
397	251	tr|F8VZN8|F8VZN8_HUMAN	231.6	31	0	0	31	13			631000	128000	24	1	0	0	30	8	Carbamidomethylation; Oxidation (M)	76533	Protein phosphatase 1 regulatory subunit 12A (Fragment) OS=Homo sapiens OX=9606 GN=PPP1R12A PE=1 SV=1
286	208	sp|P46087|NOP2_HUMAN	230.62	32	1	0	31	25	7270		25000000	15800000	26	26	1	0	34	24	Carbamidomethylation	89302	Probable 28S rRNA (cytosine(4447)-C(5))-methyltransferase OS=Homo sapiens OX=9606 GN=NOP2 PE=1 SV=2
226	278	sp|Q15393|SF3B3_HUMAN	230.29	24	0	0	24	19			32000000	17800000	25	25	0	0	44	38	Carbamidomethylation; Oxidation (M); Deamidation (NQ)	135577	Splicing factor 3B subunit 3 OS=Homo sapiens OX=9606 GN=SF3B3 PE=1 SV=4
322	382	sp|Q13547|HDAC1_HUMAN	230.03	40	5	4	31	36		68700	35300000	22800000	16	10	3	2	25	21	Carbamidomethylation; Oxidation (M)	55103	Histone deacetylase 1 OS=Homo sapiens OX=9606 GN=HDAC1 PE=1 SV=1
281	259	sp|Q86V48|LUZP1_HUMAN	229.76	35	0	0	33	17			29400000	3170000	34	34	0	0	48	14	Carbamidomethylation; Acetylation (Protein N-term); Deamidation (NQ)	120275	Leucine zipper protein 1 OS=Homo sapiens OX=9606 GN=LUZP1 PE=1 SV=2
100	324	sp|P14923|PLAK_HUMAN	229.63	38	36	33	34	32	8340000	11500000	21900000	22300000	29	29	45	43	39	35	Carbamidomethylation; Oxidation (M); Deamidation (NQ)	81745	Junction plakoglobin OS=Homo sapiens OX=9606 GN=JUP PE=1 SV=3
245	263	sp|Q8NFD5|ARI1B_HUMAN	229.1	16	0	0	11	13	0		25200000	37300000	29	27	1	0	27	41	Carbamidomethylation; Oxidation (M); Deamidation (NQ)	236121	AT-rich interactive domain-containing protein 1B OS=Homo sapiens OX=9606 GN=ARID1B PE=1 SV=2
245	264	tr|A0A3F2YNW7|A0A3F2YNW7_HUMAN	229.1	15	0	0	11	13	0		25200000	37300000	29	27	1	0	27	41	Carbamidomethylation; Oxidation (M); Deamidation (NQ)	245478	AT-rich interactive domain-containing protein 1B OS=Homo sapiens OX=9606 GN=ARID1B PE=1 SV=1
418	481	sp|O43776|SYNC_HUMAN	228.64	31	1	0	31	26	37400		15900000	9210000	18	18	1	0	20	13	Carbamidomethylation; Oxidation (M)	62943	Asparagine--tRNA ligase cytoplasmic OS=Homo sapiens OX=9606 GN=NARS PE=1 SV=1
206	483	sp|Q14739|LBR_HUMAN	228.63	24	1	2	24	23	58100	14500	131000000	82800000	23	23	1	1	50	39	Carbamidomethylation; Oxidation (M); Deamidation (NQ)	70703	Delta(14)-sterol reductase OS=Homo sapiens OX=9606 GN=LBR PE=1 SV=2
338	292	sp|Q96FS4|SIPA1_HUMAN	228.39	29	0	0	29	9			29900000	2240000	28	28	0	0	38	8	Carbamidomethylation; Oxidation (M); Deamidation (NQ)	112149	Signal-induced proliferation-associated protein 1 OS=Homo sapiens OX=9606 GN=SIPA1 PE=1 SV=1
140	398	sp|Q8N1N4|K2C78_HUMAN	227.9	45	34	36	22	22	8700000	6770000	2850000	1600000	37	21	40	49	23	25	Carbamidomethylation; Deamidation (NQ)	56866	Keratin type II cytoskeletal 78 OS=Homo sapiens OX=9606 GN=KRT78 PE=1 SV=2
392	203	sp|Q9Y6M1|IF2B2_HUMAN	227.83	39	0	2	33	35		12000	28900000	25400000	19	19	0	1	21	21	Carbamidomethylation; Oxidation (M); Deamidation (NQ)	66121	Insulin-like growth factor 2 mRNA-binding protein 2 OS=Homo sapiens OX=9606 GN=IGF2BP2 PE=1 SV=2
392	204	tr|F8W930|F8W930_HUMAN	227.83	39	0	2	33	35		12000	28900000	25400000	19	19	0	1	21	21	Carbamidomethylation; Oxidation (M); Deamidation (NQ)	66786	Insulin-like growth factor 2 mRNA-binding protein 2 OS=Homo sapiens OX=9606 GN=IGF2BP2 PE=1 SV=1
228	226	sp|P78347|GTF2I_HUMAN	227.53	27	0	0	23	25			23800000	16600000	25	23	0	0	39	40	Carbamidomethylation; Acetylation (Protein N-term); Oxidation (M); Deamidation (NQ)	112416	General transcription factor II-I OS=Homo sapiens OX=9606 GN=GTF2I PE=1 SV=2
274	312	sp|Q9H0D6|XRN2_HUMAN	227.41	23	0	0	19	23			35100000	27400000	23	23	0	0	30	36	Carbamidomethylation; Oxidation (M); Deamidation (NQ)	108583	5'-3' exoribonuclease 2 OS=Homo sapiens OX=9606 GN=XRN2 PE=1 SV=1
434	560	sp|P42167|LAP2B_HUMAN	226.31	35	4	10	35	27		13100	11500000	1630000	14	7	1	4	19	9		50670	Lamina-associated polypeptide 2 isoforms beta/gamma OS=Homo sapiens OX=9606 GN=TMPO PE=1 SV=2
375	227	sp|Q8TED0|UTP15_HUMAN	225.4	51	2	2	51	34	884000	1190000	52000000	11700000	25	25	1	1	24	17	Carbamidomethylation; Acetylation (Protein N-term)	58415	U3 small nucleolar RNA-associated protein 15 homolog OS=Homo sapiens OX=9606 GN=UTP15 PE=1 SV=3
187	360	sp|P19474|RO52_HUMAN	224.25	43	42	36	20	21	27600000	17600000	10500000	15600000	24	24	41	30	13	16	Carbamidomethylation; Oxidation (M); Deamidation (NQ)	54170	E3 ubiquitin-protein ligase TRIM21 OS=Homo sapiens OX=9606 GN=TRIM21 PE=1 SV=1
411	847	sp|Q8NCA5|FA98A_HUMAN	223.86	30	0	2	30	29		73900	102000000	50400000	15	15	0	1	26	17	Carbamidomethylation; Oxidation (M); Deamidation (NQ)	55401	Protein FAM98A OS=Homo sapiens OX=9606 GN=FAM98A PE=1 SV=1
180	341	sp|P68371|TBB4B_HUMAN	223.85	41	39	30	30	28	1780000	1730000	1860000	1790000	17	2	33	28	21	22	Carbamidomethylation; Oxidation (M)	49831	Tubulin beta-4B chain OS=Homo sapiens OX=9606 GN=TUBB4B PE=1 SV=1
157	350	sp|Q7Z406|MYH14_HUMAN	223.8	11	2	1	9	9	834000				37	1	3	2	70	49	Carbamidomethylation; Oxidation (M); Deamidation (NQ)	227868	Myosin-14 OS=Homo sapiens OX=9606 GN=MYH14 PE=1 SV=2
141	713	tr|F8W6I7|F8W6I7_HUMAN	223.77	42	37	37	39	36	19800000	20100000	28100000	26500000	17	12	34	40	30	36	Carbamidomethylation; Acetylation (Protein N-term); Oxidation (M); Deamidation (NQ)	33155	Heterogeneous nuclear ribonucleoprotein A1 OS=Homo sapiens OX=9606 GN=HNRNPA1 PE=1 SV=2
141	714	sp|P09651|ROA1_HUMAN	223.77	35	31	31	33	29	19800000	20100000	28100000	26500000	17	12	34	40	30	36	Carbamidomethylation; Acetylation (Protein N-term); Oxidation (M); Deamidation (NQ)	38747	Heterogeneous nuclear ribonucleoprotein A1 OS=Homo sapiens OX=9606 GN=HNRNPA1 PE=1 SV=5
276	405	sp|P06733|ENOA_HUMAN	223.15	44	41	42	18	22	22000000	26300000	2020000	5130000	19	19	19	26	7	8	Carbamidomethylation; Oxidation (M)	47169	Alpha-enolase OS=Homo sapiens OX=9606 GN=ENO1 PE=1 SV=2
170	340	sp|P07437|TBB5_HUMAN	223.11	41	39	30	30	32	3210000	762000	3980000	4530000	17	2	32	29	24	25	Carbamidomethylation; Oxidation (M)	49671	Tubulin beta chain OS=Homo sapiens OX=9606 GN=TUBB PE=1 SV=2
351	260	sp|Q99832|TCPH_HUMAN	222.58	47	2	1	40	34	83500	58300	34200000	22600000	24	23	1	1	26	18	Carbamidomethylation; Acetylation (Protein N-term); Oxidation (M)	59367	T-complex protein 1 subunit eta OS=Homo sapiens OX=9606 GN=CCT7 PE=1 SV=2
443	411	sp|Q9HCD5|NCOA5_HUMAN	222.46	41	0	4	41	27		0	38900000	8260000	18	13	0	2	23	11	Carbamidomethylation; Oxidation (M)	65536	Nuclear receptor coactivator 5 OS=Homo sapiens OX=9606 GN=NCOA5 PE=1 SV=2
73	726	sp|P12035|K2C3_HUMAN	222.24	23	18	18	12	11		234000	181000	25800	30	2	62	71	41	44	Oxidation (M); Deamidation (NQ)	64417	Keratin type II cytoskeletal 3 OS=Homo sapiens OX=9606 GN=KRT3 PE=1 SV=3
238	325	sp|O75533|SF3B1_HUMAN	222.23	23	0	0	22	15			30300000	10000000	30	30	0	0	47	28	Carbamidomethylation; Oxidation (M); Deamidation (NQ)	145830	Splicing factor 3B subunit 1 OS=Homo sapiens OX=9606 GN=SF3B1 PE=1 SV=3
335	408	tr|F8VXG7|F8VXG7_HUMAN	221.68	19	0	0	18	11			46600000	7770000	27	27	0	0	35	15	Deamidation (NQ)	142602	Protein SCAF11 OS=Homo sapiens OX=9606 GN=SCAF11 PE=1 SV=1
335	419	sp|Q99590|SCAFB_HUMAN	221.68	16	0	0	16	9			46600000	7770000	27	27	0	0	35	15	Deamidation (NQ)	164651	Protein SCAF11 OS=Homo sapiens OX=9606 GN=SCAF11 PE=1 SV=2
242	520	sp|O75643|U520_HUMAN	221.65	17	1	0	12	15	229000		18000000	18300000	40	40	2	0	38	40	Oxidation (M); Deamidation (NQ)	244505	U5 small nuclear ribonucleoprotein 200 kDa helicase OS=Homo sapiens OX=9606 GN=SNRNP200 PE=1 SV=2
230	344	sp|P49916|DNLI3_HUMAN	220.48	27	0	0	26	25			32000000	22000000	27	27	0	0	41	38	Carbamidomethylation; Oxidation (M); Deamidation (NQ)	112907	DNA ligase 3 OS=Homo sapiens OX=9606 GN=LIG3 PE=1 SV=2
74	1106	sp|Q6S8J3|POTEE_HUMAN	220.35	11	9	10	10	9	2680000	1820000	3880000	2360000	23	2	54	48	53	58	Oxidation (M); Deamidation (NQ)	121363	POTE ankyrin domain family member E OS=Homo sapiens OX=9606 GN=POTEE PE=2 SV=3
144	1528	sp|Q93077|H2A1C_HUMAN	220.24	66	56	66	45	35	4650000	4660000	7220000	9410000	21	1	29	29	38	44	Deamidation (NQ)	14105	Histone H2A type 1-C OS=Homo sapiens OX=9606 GN=HIST1H2AC PE=1 SV=3
332	322	sp|Q9H4M9|EHD1_HUMAN	219.3	49	0	1	47	31		0	26200000	18600000	26	23	0	1	29	20	Acetylation (Protein N-term); Oxidation (M); Deamidation (NQ)	60627	EH domain-containing protein 1 OS=Homo sapiens OX=9606 GN=EHD1 PE=1 SV=2
332	323	tr|A0A024R571|A0A024R571_HUMAN	219.3	48	0	1	46	30		0	26200000	18600000	26	23	0	1	29	20	Acetylation (Protein N-term); Oxidation (M); Deamidation (NQ)	61927	EH domain-containing protein 1 OS=Homo sapiens OX=9606 GN=EHD1 PE=1 SV=1
271	330	sp|Q00610|CLH1_HUMAN	218.77	20	1	0	19	13	81000		29100000	6470000	31	31	2	0	41	24	Carbamidomethylation; Acetylation (Protein N-term); Oxidation (M); Deamidation (NQ)	191613	Clathrin heavy chain 1 OS=Homo sapiens OX=9606 GN=CLTC PE=1 SV=5
271	331	tr|A0A087WVQ6|A0A087WVQ6_HUMAN	218.77	20	1	0	19	13	81000		29100000	6470000	31	31	2	0	41	24	Carbamidomethylation; Acetylation (Protein N-term); Oxidation (M); Deamidation (NQ)	192057	Clathrin heavy chain OS=Homo sapiens OX=9606 GN=CLTC PE=1 SV=1
216	306	sp|P51531|SMCA2_HUMAN	218.75	19	1	0	18	17	7960		16400000	13700000	30	20	1	0	44	45	Carbamidomethylation; Oxidation (M); Deamidation (NQ)	181278	Probable global transcription activator SNF2L2 OS=Homo sapiens OX=9606 GN=SMARCA2 PE=1 SV=2
356	280	sp|P61221|ABCE1_HUMAN	218.24	42	0	0	37	40			31600000	31400000	24	24	0	0	21	24	Carbamidomethylation; Oxidation (M); Deamidation (NQ)	67314	ATP-binding cassette sub-family E member 1 OS=Homo sapiens OX=9606 GN=ABCE1 PE=1 SV=1
525	592	sp|Q5JTV8|TOIP1_HUMAN	218.13	26	0	0	26	20			37400000	16500000	12	12	0	0	13	12	Carbamidomethylation; Deamidation (NQ)	66248	Torsin-1A-interacting protein 1 OS=Homo sapiens OX=9606 GN=TOR1AIP1 PE=1 SV=2
525	599	tr|A0A0A0MSK5|A0A0A0MSK5_HUMAN	218.13	32	0	0	32	26			37400000	16500000	12	12	0	0	13	12	Carbamidomethylation; Deamidation (NQ)	52406	Torsin-1A-interacting protein 1 OS=Homo sapiens OX=9606 GN=TOR1AIP1 PE=1 SV=1
282	282	sp|Q96GM5|SMRD1_HUMAN	217.71	43	0	1	43	36			51400000	39700000	26	18	0	1	30	25	Carbamidomethylation; Oxidation (M); Deamidation (NQ)	58233	SWI/SNF-related matrix-associated actin-dependent regulator of chromatin subfamily D member 1 OS=Homo sapiens OX=9606 GN=SMARCD1 PE=1 SV=2
159	332	sp|P25705|ATPA_HUMAN	216.43	37	37	37	24	22	31100000	19500000	20200000	19100000	21	21	36	32	21	22	Oxidation (M)	59751	ATP synthase subunit alpha mitochondrial OS=Homo sapiens OX=9606 GN=ATP5F1A PE=1 SV=1
496	387	sp|Q969V3|NCLN_HUMAN	215.75	42	2	2	34	23	977000	471000	24300000	15800000	20	20	1	1	18	12	Oxidation (M); Deamidation (NQ)	62974	Nicalin OS=Homo sapiens OX=9606 GN=NCLN PE=1 SV=2
425	482	sp|Q29RF7|PDS5A_HUMAN	214.53	20	0	0	18	7			10000000	2380000	24	21	0	0	26	15	Carbamidomethylation; Deamidation (NQ)	150830	Sister chromatid cohesion protein PDS5 homolog A OS=Homo sapiens OX=9606 GN=PDS5A PE=1 SV=1
472	511	sp|O95870|ABHGA_HUMAN	213.8	30	0	0	30	23			15900000	6380000	15	15	0	0	20	12	Carbamidomethylation; Oxidation (M)	63243	Protein ABHD16A OS=Homo sapiens OX=9606 GN=ABHD16A PE=1 SV=3
472	514	tr|A0A0G2JJD3|A0A0G2JJD3_HUMAN	213.8	28	0	0	28	21			15900000	6380000	15	15	0	0	20	12	Carbamidomethylation; Oxidation (M)	67519	HLA-B associated transcript 5 isoform CRA_b OS=Homo sapiens OX=9606 GN=ABHD16A PE=1 SV=1
77	566	sp|O95678|K2C75_HUMAN	213.59	28	24	25	19	18	0			62400	34	2	58	74	44	40	Carbamidomethylation; Oxidation (M); Deamidation (NQ)	59560	Keratin type II cytoskeletal 75 OS=Homo sapiens OX=9606 GN=KRT75 PE=1 SV=2
442	624	sp|P52294|IMA5_HUMAN	213.5	29	0	0	27	25			13200000	11700000	16	5	0	0	18	15	Carbamidomethylation; Oxidation (M); Deamidation (NQ)	60222	Importin subunit alpha-5 OS=Homo sapiens OX=9606 GN=KPNA1 PE=1 SV=3
197	335	sp|P13639|EF2_HUMAN	213.21	29	8	3	26	21	1330000	272000	69200000	50800000	26	25	11	6	46	35	Carbamidomethylation; Oxidation (M); Deamidation (NQ)	95338	Elongation factor 2 OS=Homo sapiens OX=9606 GN=EEF2 PE=1 SV=4
225	412	sp|Q5VTE0|EF1A3_HUMAN	211.84	31	31	27	27	25	22500000	10200000	24400000	22500000	15	14	20	20	19	18	Oxidation (M)	50185	Putative elongation factor 1-alpha-like 3 OS=Homo sapiens OX=9606 GN=EEF1A1P5 PE=5 SV=1
225	413	sp|P68104|EF1A1_HUMAN	211.84	31	31	27	27	25	22500000	10200000	24400000	22500000	15	14	20	20	19	18	Oxidation (M)	50141	Elongation factor 1-alpha 1 OS=Homo sapiens OX=9606 GN=EEF1A1 PE=1 SV=1
317	353	sp|P11586|C1TC_HUMAN	211.82	26	0	1	19	23		188000	13700000	8050000	26	24	0	2	21	33	Carbamidomethylation; Oxidation (M); Deamidation (NQ)	101559	C-1-tetrahydrofolate synthase cytoplasmic OS=Homo sapiens OX=9606 GN=MTHFD1 PE=1 SV=3
317	354	tr|F5H2F4|F5H2F4_HUMAN	211.82	24	0	1	17	21		188000	13700000	8050000	26	24	0	2	21	33	Carbamidomethylation; Oxidation (M); Deamidation (NQ)	110613	C-1-tetrahydrofolate synthase cytoplasmic OS=Homo sapiens OX=9606 GN=MTHFD1 PE=1 SV=1
306	515	sp|P01024|CO3_HUMAN	211.69	10	0	0	8	9			38000000	152000000	25	7	0	0	21	33	Carbamidomethylation; Oxidation (M); Deamidation (NQ)	187147	Complement C3 OS=Homo sapiens OX=9606 GN=C3 PE=1 SV=2
236	383	tr|H0Y2W2|H0Y2W2_HUMAN	211.16	49	13	10	43	39					29	0	8	6	41	26	Oxidation (M); Deamidation (NQ)	64363	ATPase family AAA domain-containing protein 3A (Fragment) OS=Homo sapiens OX=9606 GN=ATAD3A PE=1 SV=1
321	277	sp|Q9UGN5|PARP2_HUMAN	210.87	37	0	0	32	29			28500000	39600000	20	18	0	0	28	27	Carbamidomethylation; Oxidation (M); Deamidation (NQ)	66206	Poly [ADP-ribose] polymerase 2 OS=Homo sapiens OX=9606 GN=PARP2 PE=1 SV=2
229	406	sp|Q9NVI7|ATD3A_HUMAN	210.37	52	12	9	47	42			353000	305000	32	1	8	6	43	27	Acetylation (Protein N-term); Oxidation (M); Deamidation (NQ)	71369	ATPase family AAA domain-containing protein 3A OS=Homo sapiens OX=9606 GN=ATAD3A PE=1 SV=2
571	622	sp|Q3LXA3|TKFC_HUMAN	210.2	29	0	0	27	27			13500000	8130000	15	15	0	0	14	14	Deamidation (NQ)	58947	Triokinase/FMN cyclase OS=Homo sapiens OX=9606 GN=TKFC PE=1 SV=2
339	517	sp|Q13435|SF3B2_HUMAN	209.65	29	0	1	27	11		193000	27100000	9090000	22	22	0	1	32	18	Oxidation (M)	100228	Splicing factor 3B subunit 2 OS=Homo sapiens OX=9606 GN=SF3B2 PE=1 SV=2
358	359	sp|Q9H9G7|AGO3_HUMAN	209.43	24	0	0	16	22			887000	2810000	17	7	0	0	19	26	Carbamidomethylation; Oxidation (M)	97360	Protein argonaute-3 OS=Homo sapiens OX=9606 GN=AGO3 PE=1 SV=2
310	366	sp|P25205|MCM3_HUMAN	209.4	27	1	0	27	21	979000		21700000	13900000	20	18	1	0	33	22	Carbamidomethylation; Acetylation (Protein N-term); Oxidation (M)	90981	DNA replication licensing factor MCM3 OS=Homo sapiens OX=9606 GN=MCM3 PE=1 SV=3
232	393	tr|A0A0A0MRM9|A0A0A0MRM9_HUMAN	209.36	28	1	0	27	22			252000		28	1	1	0	52	26	Deamidation (NQ)	74663	Nucleolar and coiled-body phosphoprotein 1 (Fragment) OS=Homo sapiens OX=9606 GN=NOLC1 PE=1 SV=1
231	392	sp|Q14978|NOLC1_HUMAN	209.21	28	1	0	27	23			6230000	363000	29	2	1	0	52	27	Acetylation (Protein N-term); Deamidation (NQ)	73603	Nucleolar and coiled-body phosphoprotein 1 OS=Homo sapiens OX=9606 GN=NOLC1 PE=1 SV=2
307	283	sp|P49748|ACADV_HUMAN	209.17	38	6	10	30	34	1130000	508000	30600000	33800000	24	24	4	7	23	20	Carbamidomethylation; Oxidation (M); Deamidation (NQ)	70390	Very long-chain specific acyl-CoA dehydrogenase mitochondrial OS=Homo sapiens OX=9606 GN=ACADVL PE=1 SV=1
400	510	sp|P26640|SYVC_HUMAN	208.05	17	0	0	15	12			7340000	2880000	21	21	0	0	22	17	Carbamidomethylation; Acetylation (Protein N-term)	140476	Valine--tRNA ligase OS=Homo sapiens OX=9606 GN=VARS PE=1 SV=4
253	379	tr|B7Z6D5|B7Z6D5_HUMAN	207.58	27	0	0	24	27			25500000	40000000	23	22	0	0	38	32	Carbamidomethylation; Oxidation (M); Deamidation (NQ)	86605	Probable ATP-dependent RNA helicase DDX27 OS=Homo sapiens OX=9606 GN=DDX27 PE=1 SV=1
253	380	sp|Q96GQ7|DDX27_HUMAN	207.58	26	0	0	23	26			25500000	40000000	23	22	0	0	38	32	Carbamidomethylation; Oxidation (M); Deamidation (NQ)	89835	Probable ATP-dependent RNA helicase DDX27 OS=Homo sapiens OX=9606 GN=DDX27 PE=1 SV=2
72	798	sp|Q562R1|ACTBL_HUMAN	207.15	37	28	27	35	34	219000		1720000	1580000	25	2	60	55	57	50	Carbamidomethylation; Oxidation (M); Deamidation (NQ)	42003	Beta-actin-like protein 2 OS=Homo sapiens OX=9606 GN=ACTBL2 PE=1 SV=2
360	363	sp|P48444|COPD_HUMAN	207.03	43	0	0	39	36			56300000	37500000	23	23	0	0	24	23	Carbamidomethylation; Oxidation (M); Deamidation (NQ)	57210	Coatomer subunit delta OS=Homo sapiens OX=9606 GN=ARCN1 PE=1 SV=1
360	364	tr|B0YIW6|B0YIW6_HUMAN	207.03	40	0	0	36	34			56300000	37500000	23	23	0	0	24	23	Carbamidomethylation; Oxidation (M); Deamidation (NQ)	61626	Archain 1 isoform CRA_a OS=Homo sapiens OX=9606 GN=ARCN1 PE=1 SV=1
312	374	tr|J3KS54|J3KS54_HUMAN	207.03	30	0	0	28	22			2710000	355000	24	2	0	0	39	20	Carbamidomethylation; Acetylation (Protein N-term); Oxidation (M)	78087	Protein flightless-1 homolog OS=Homo sapiens OX=9606 GN=FLII PE=1 SV=1
363	414	tr|A0A1C7CYX9|A0A1C7CYX9_HUMAN	206.52	26	7	18	22	19	496000	1070000	12700000	10800000	15	12	6	10	15	13	Carbamidomethylation; Oxidation (M); Deamidation (NQ)	73503	Dihydropyrimidinase-related protein 2 OS=Homo sapiens OX=9606 GN=DPYSL2 PE=1 SV=1
363	417	sp|Q16555|DPYL2_HUMAN	206.52	31	9	21	26	22	496000	1070000	12700000	10800000	15	12	6	10	15	13	Carbamidomethylation; Oxidation (M); Deamidation (NQ)	62294	Dihydropyrimidinase-related protein 2 OS=Homo sapiens OX=9606 GN=DPYSL2 PE=1 SV=1
263	378	sp|P48643|TCPE_HUMAN	206.38	40	2	3	39	30	26300	107000	49200000	35000000	24	23	1	2	33	29	Carbamidomethylation; Oxidation (M); Deamidation (NQ)	59671	T-complex protein 1 subunit epsilon OS=Homo sapiens OX=9606 GN=CCT5 PE=1 SV=1
359	367	tr|C9J4M6|C9J4M6_HUMAN	206.35	22	0	0	21	14			13400000	3930000	24	24	0	0	26	22	Carbamidomethylation; Deamidation (NQ)	121373	DNA-directed RNA polymerase subunit beta OS=Homo sapiens OX=9606 GN=POLR2B PE=1 SV=3
359	368	tr|A0A1W2PPT5|A0A1W2PPT5_HUMAN	206.35	21	0	0	20	14			13400000	3930000	24	24	0	0	26	22	Carbamidomethylation; Deamidation (NQ)	125189	DNA-directed RNA polymerase subunit beta OS=Homo sapiens OX=9606 GN=POLR2B PE=1 SV=1
359	369	tr|C9J2Y9|C9J2Y9_HUMAN	206.35	20	0	0	19	13			13400000	3930000	24	24	0	0	26	22	Carbamidomethylation; Deamidation (NQ)	133057	DNA-directed RNA polymerase subunit beta OS=Homo sapiens OX=9606 GN=POLR2B PE=1 SV=2
359	370	sp|P30876|RPB2_HUMAN	206.35	20	0	0	19	13			13400000	3930000	24	24	0	0	26	22	Carbamidomethylation; Deamidation (NQ)	133896	DNA-directed RNA polymerase II subunit RPB2 OS=Homo sapiens OX=9606 GN=POLR2B PE=1 SV=1
526	738	tr|A9IYQ1|A9IYQ1_HUMAN	205.86	58	8	3	52	23			0		14	1	2	1	17	8	Oxidation (M); Deamidation (NQ)	33692	Sister chromatid cohesion protein PDS5 homolog B (Fragment) OS=Homo sapiens OX=9606 GN=PDS5B PE=1 SV=1
316	487	sp|Q9BUQ8|DDX23_HUMAN	205.64	20	0	1	20	18		0	12100000	7390000	16	16	0	1	28	20	Deamidation (NQ)	95583	Probable ATP-dependent RNA helicase DDX23 OS=Homo sapiens OX=9606 GN=DDX23 PE=1 SV=3
368	365	sp|Q96I24|FUBP3_HUMAN	205.54	32	0	0	32	27			27500000	19600000	17	13	0	0	23	18	Acetylation (Protein N-term); Oxidation (M)	61640	Far upstream element-binding protein 3 OS=Homo sapiens OX=9606 GN=FUBP3 PE=1 SV=2
303	422	sp|P54577|SYYC_HUMAN	205.51	45	0	0	45	34			49800000	37000000	25	25	0	0	28	21	Carbamidomethylation; Oxidation (M)	59144	Tyrosine--tRNA ligase cytoplasmic OS=Homo sapiens OX=9606 GN=YARS PE=1 SV=4
456	528	sp|Q92835|SHIP1_HUMAN	205.5	21	2	0	12	17	374000		9720000	6160000	22	22	1	0	16	22	Carbamidomethylation; Oxidation (M); Deamidation (NQ)	133292	Phosphatidylinositol 3 4 5-trisphosphate 5-phosphatase 1 OS=Homo sapiens OX=9606 GN=INPP5D PE=1 SV=2
343	372	tr|A0A0C4DFX4|A0A0C4DFX4_HUMAN	205.38	8	0	0	7	7			18000000	9570000	20	20	0	0	24	22	Carbamidomethylation; Deamidation (NQ)	325778	Uncharacterized protein (Fragment) OS=Homo sapiens OX=9606 PE=4 SV=1
343	373	tr|A0A0A0MS59|A0A0A0MS59_HUMAN	205.38	8	0	0	7	7			18000000	9570000	20	20	0	0	24	22	Carbamidomethylation; Deamidation (NQ)	315614	Helicase SRCAP OS=Homo sapiens OX=9606 GN=SRCAP PE=1 SV=1
343	375	sp|Q6ZRS2|SRCAP_HUMAN	205.38	7	0	0	7	7			18000000	9570000	20	20	0	0	24	22	Carbamidomethylation; Deamidation (NQ)	343555	Helicase SRCAP OS=Homo sapiens OX=9606 GN=SRCAP PE=1 SV=3
109	1057	sp|P62807|H2B1C_HUMAN	205.11	78	69	67	45	54	75600000	68800000	151000000	156000000	19	4	43	37	31	44	Oxidation (M); Deamidation (NQ)	13906	Histone H2B type 1-C/E/F/G/I OS=Homo sapiens OX=9606 GN=HIST1H2BC PE=1 SV=4
264	467	tr|Q53FA3|Q53FA3_HUMAN	204.91	23	9	17	23	22					15	0	8	14	24	21	Oxidation (M); Deamidation (NQ)	70404	HSPA1L (Fragment) OS=Homo sapiens OX=9606 GN=HSPA1L PE=1 SV=1
264	468	sp|P34931|HS71L_HUMAN	204.91	23	9	17	23	22					15	0	8	14	24	21	Oxidation (M); Deamidation (NQ)	70375	Heat shock 70 kDa protein 1-like OS=Homo sapiens OX=9606 GN=HSPA1L PE=1 SV=2
340	572	sp|Q86VM9|ZCH18_HUMAN	204.32	15	0	0	15	13			39600000	28500000	15	15	0	0	24	25		106379	Zinc finger CCCH domain-containing protein 18 OS=Homo sapiens OX=9606 GN=ZC3H18 PE=1 SV=2
340	573	tr|E7ERS3|E7ERS3_HUMAN	204.32	15	0	0	15	12			39600000	28500000	15	15	0	0	24	25		108940	Zinc finger CCCH domain-containing protein 18 OS=Homo sapiens OX=9606 GN=ZC3H18 PE=1 SV=1
354	361	tr|F5GWF6|F5GWF6_HUMAN	204.21	41	2	4	41	32	0	175000	49300000	22900000	25	24	1	2	29	16	Carbamidomethylation; Oxidation (M)	56807	T-complex protein 1 subunit beta OS=Homo sapiens OX=9606 GN=CCT2 PE=1 SV=2
354	362	sp|P78371|TCPB_HUMAN	204.21	40	1	4	40	32	0	175000	49300000	22900000	25	24	1	2	29	16	Carbamidomethylation; Oxidation (M)	57488	T-complex protein 1 subunit beta OS=Homo sapiens OX=9606 GN=CCT2 PE=1 SV=4
208	676	sp|P54652|HSP72_HUMAN	204.16	21	17	18	21	20					15	0	19	21	29	22	Deamidation (NQ)	70021	Heat shock-related 70 kDa protein 2 OS=Homo sapiens OX=9606 GN=HSPA2 PE=1 SV=1
244	672	sp|Q13885|TBB2A_HUMAN	204.09	34	28	22	22	24		250000	656000	459000	14	1	22	22	17	17	Carbamidomethylation; Oxidation (M)	49907	Tubulin beta-2A chain OS=Homo sapiens OX=9606 GN=TUBB2A PE=1 SV=1
244	673	sp|Q9BVA1|TBB2B_HUMAN	204.09	34	28	22	22	24		250000	656000	459000	14	1	22	22	17	17	Carbamidomethylation; Oxidation (M)	49953	Tubulin beta-2B chain OS=Homo sapiens OX=9606 GN=TUBB2B PE=1 SV=1
403	576	sp|P30740|ILEU_HUMAN	203.78	40	36	33	8	20	9250000	5460000	464000	1710000	16	15	17	15	2	6	Acetylation (Protein N-term)	42742	Leukocyte elastase inhibitor OS=Homo sapiens OX=9606 GN=SERPINB1 PE=1 SV=1
431	563	sp|Q12874|SF3A3_HUMAN	203.42	33	0	0	27	30			41400000	26900000	17	17	0	0	18	16	Carbamidomethylation; Acetylation (Protein N-term); Oxidation (M); Deamidation (NQ)	58849	Splicing factor 3A subunit 3 OS=Homo sapiens OX=9606 GN=SF3A3 PE=1 SV=1
395	533	sp|O43818|U3IP2_HUMAN	203.37	31	0	0	31	31			70500000	38800000	15	15	0	0	22	17	Carbamidomethylation; Deamidation (NQ)	51841	U3 small nucleolar RNA-interacting protein 2 OS=Homo sapiens OX=9606 GN=RRP9 PE=1 SV=1
545	539	sp|Q9BZI7|REN3B_HUMAN	202.63	35	0	0	35	15			18700000	3630000	16	16	0	0	19	8	Oxidation (M)	57762	Regulator of nonsense transcripts 3B OS=Homo sapiens OX=9606 GN=UPF3B PE=1 SV=1
376	339	sp|Q4G176|ACSF3_HUMAN	202.59	33	0	0	32	27			26600000	17000000	20	19	0	0	25	20	Carbamidomethylation; Oxidation (M)	64130	Acyl-CoA synthetase family member 3 mitochondrial OS=Homo sapiens OX=9606 GN=ACSF3 PE=1 SV=3
331	388	sp|P50990|TCPQ_HUMAN	202.58	43	2	8	36	34	231000	166000	52700000	44500000	24	24	1	4	24	18	Carbamidomethylation; Oxidation (M); Deamidation (NQ)	59621	T-complex protein 1 subunit theta OS=Homo sapiens OX=9606 GN=CCT8 PE=1 SV=4
419	636	sp|O60684|IMA7_HUMAN	202.45	30	0	0	30	25			17400000	16000000	18	5	0	0	18	16	Carbamidomethylation; Oxidation (M); Deamidation (NQ)	60030	Importin subunit alpha-7 OS=Homo sapiens OX=9606 GN=KPNA6 PE=1 SV=1
285	329	sp|Q86VP6|CAND1_HUMAN	202.07	22	1	1	20	19	0	0	14600000	9430000	26	26	1	1	32	30	Carbamidomethylation; Acetylation (Protein N-term); Deamidation (NQ)	136375	Cullin-associated NEDD8-dissociated protein 1 OS=Homo sapiens OX=9606 GN=CAND1 PE=1 SV=2
290	460	tr|A0A087WUZ3|A0A087WUZ3_HUMAN	201.99	15	0	0	14	9			18100000	3860000	32	28	0	0	36	23	Carbamidomethylation; Oxidation (M); Deamidation (NQ)	274828	Spectrin beta chain OS=Homo sapiens OX=9606 GN=SPTBN1 PE=1 SV=1
290	461	sp|Q01082|SPTB2_HUMAN	201.99	15	0	0	14	9			18100000	3860000	32	28	0	0	36	23	Carbamidomethylation; Oxidation (M); Deamidation (NQ)	274608	Spectrin beta chain non-erythrocytic 1 OS=Homo sapiens OX=9606 GN=SPTBN1 PE=1 SV=2
532	562	sp|O43159|RRP8_HUMAN	201.84	33	0	3	33	27		115000000	17900000	12800000	14	14	0	1	16	13	Carbamidomethylation; Deamidation (NQ)	50715	Ribosomal RNA-processing protein 8 OS=Homo sapiens OX=9606 GN=RRP8 PE=1 SV=2
420	536	sp|Q8N684|CPSF7_HUMAN	201.81	33	9	12	31	28	245000	384000	37400000	21100000	15	15	4	5	16	12		52050	Cleavage and polyadenylation specificity factor subunit 7 OS=Homo sapiens OX=9606 GN=CPSF7 PE=1 SV=1
270	1151	tr|C9JQ00|C9JQ00_HUMAN	201.79	60	25	20	60	43			226000		16	1	10	14	23	16	Oxidation (M); Deamidation (NQ)	19808	Tubulin alpha chain (Fragment) OS=Homo sapiens OX=9606 GN=TUBA4A PE=1 SV=1
243	493	sp|P07355|ANXA2_HUMAN	201.74	51	28	17	37	37	1790000	1560000	30400000	25900000	20	20	11	6	27	29	Carbamidomethylation; Acetylation (Protein N-term); Oxidation (M)	38604	Annexin A2 OS=Homo sapiens OX=9606 GN=ANXA2 PE=1 SV=2
657	1914	tr|B5MCB4|B5MCB4_HUMAN	201.67	53	0	0	53	52			1450000	3750000	9	2	0	0	11	10	Acetylation (Protein N-term); Oxidation (M)	20011	Methyl-CpG-binding protein 2 OS=Homo sapiens OX=9606 GN=MECP2 PE=1 SV=2
265	473	sp|Q9BQG0|MBB1A_HUMAN	201.66	25	0	0	23	14			29200000	14300000	32	32	0	0	38	28	Carbamidomethylation; Oxidation (M); Deamidation (NQ)	148854	Myb-binding protein 1A OS=Homo sapiens OX=9606 GN=MYBBP1A PE=1 SV=2
326	459	sp|Q13813|SPTN1_HUMAN	201.51	16	0	0	14	5			731000		36	1	1	1	36	15		284538	Spectrin alpha chain non-erythrocytic 1 OS=Homo sapiens OX=9606 GN=SPTAN1 PE=1 SV=3
483	883	sp|P25490|TYY1_HUMAN	201.27	30	2	0	30	24	20500		35500000	28400000	13	13	1	0	15	13	Carbamidomethylation	44713	Transcriptional repressor protein YY1 OS=Homo sapiens OX=9606 GN=YY1 PE=1 SV=2
352	541	sp|O94906|PRP6_HUMAN	200.96	26	0	0	22	16			21800000	10600000	24	24	0	0	27	20	Carbamidomethylation	106925	Pre-mRNA-processing factor 6 OS=Homo sapiens OX=9606 GN=PRPF6 PE=1 SV=1
467	499	tr|B7WPG3|B7WPG3_HUMAN	200.85	36	1	0	34	27			10800000	8730000	15	14	1	0	18	14	Carbamidomethylation; Oxidation (M)	56451	Heterogeneous nuclear ribonucleoprotein L-like OS=Homo sapiens OX=9606 GN=HNRNPLL PE=1 SV=1
467	503	sp|Q8WVV9|HNRLL_HUMAN	200.85	34	1	0	32	25			10800000	8730000	15	14	1	0	18	14	Carbamidomethylation; Oxidation (M)	60083	Heterogeneous nuclear ribonucleoprotein L-like OS=Homo sapiens OX=9606 GN=HNRNPLL PE=1 SV=1
467	504	tr|C9IYN3|C9IYN3_HUMAN	200.85	34	1	0	32	26			10800000	8730000	15	14	1	0	18	14	Carbamidomethylation; Oxidation (M)	59664	Heterogeneous nuclear ribonucleoprotein L-like isoform CRA_a OS=Homo sapiens OX=9606 GN=HNRNPLL PE=1 SV=2
467	505	tr|D6W592|D6W592_HUMAN	200.85	34	1	0	32	25			10800000	8730000	15	14	1	0	18	14	Carbamidomethylation; Oxidation (M)	60099	Heterogeneous nuclear ribonucleoprotein L-like isoform CRA_d OS=Homo sapiens OX=9606 GN=HNRNPLL PE=1 SV=1
301	532	sp|P06576|ATPB_HUMAN	200.61	35	34	33	10	14	7710000	6750000	3920000	3520000	15	15	16	20	7	10	Oxidation (M); Deamidation (NQ)	56560	ATP synthase subunit beta mitochondrial OS=Homo sapiens OX=9606 GN=ATP5F1B PE=1 SV=3
341	445	sp|Q96ME7|ZN512_HUMAN	200.4	34	0	0	31	27			28700000	22000000	18	18	0	0	26	23	Carbamidomethylation; Oxidation (M); Deamidation (NQ)	64682	Zinc finger protein 512 OS=Homo sapiens OX=9606 GN=ZNF512 PE=1 SV=2
341	446	tr|G3XAG1|G3XAG1_HUMAN	200.4	34	0	0	31	27			28700000	22000000	18	18	0	0	26	23	Carbamidomethylation; Oxidation (M); Deamidation (NQ)	64595	Zinc finger protein 512 OS=Homo sapiens OX=9606 GN=ZNF512 PE=1 SV=1
504	358	sp|O75746|CMC1_HUMAN	200.26	29	0	0	11	29			1080000	10200000	17	10	0	0	8	20	Carbamidomethylation	74762	Calcium-binding mitochondrial carrier protein Aralar1 OS=Homo sapiens OX=9606 GN=SLC25A12 PE=1 SV=2
269	1335	tr|E9PI65|E9PI65_HUMAN	200.22	61	46	40	61	57			216000		11	1	9	10	24	20	Oxidation (M); Deamidation (NQ)	17916	Heat shock cognate 71 kDa protein (Fragment) OS=Homo sapiens OX=9606 GN=HSPA8 PE=1 SV=1
268	427	sp|Q92900|RENT1_HUMAN	199.85	25	0	3	20	22		44500	16100000	10900000	24	23	0	2	33	34	Carbamidomethylation; Oxidation (M); Deamidation (NQ)	124345	Regulator of nonsense transcripts 1 OS=Homo sapiens OX=9606 GN=UPF1 PE=1 SV=2
295	352	sp|Q9UL18|AGO1_HUMAN	199.21	23	0	0	17	23			5170000	5330000	16	6	0	0	22	30	Carbamidomethylation; Oxidation (M); Deamidation (NQ)	97214	Protein argonaute-1 OS=Homo sapiens OX=9606 GN=AGO1 PE=1 SV=3
388	634	sp|Q10570|CPSF1_HUMAN	198.59	16	0	0	14	12			10100000	6650000	22	22	0	0	24	22	Deamidation (NQ)	160883	Cleavage and polyadenylation specificity factor subunit 1 OS=Homo sapiens OX=9606 GN=CPSF1 PE=1 SV=2
435	791	sp|Q8WWY3|PRP31_HUMAN	198.53	25	0	0	25	22			30000000	25600000	12	12	0	0	16	17	Oxidation (M); Deamidation (NQ)	55456	U4/U6 small nuclear ribonucleoprotein Prp31 OS=Homo sapiens OX=9606 GN=PRPF31 PE=1 SV=2
333	484	tr|M0R019|M0R019_HUMAN	198.36	48	7	6	39	43			596000		17	1	2	2	19	27	Acetylation (Protein N-term); Oxidation (M); Deamidation (NQ)	37627	Heterogeneous nuclear ribonucleoprotein M (Fragment) OS=Homo sapiens OX=9606 GN=HNRNPM PE=1 SV=8
68	835	sp|Q7Z794|K2C1B_HUMAN	198.33	25	14	17	17	12	914000	427000	1460000	274000	33	7	64	74	60	55	Carbamidomethylation; Oxidation (M); Deamidation (NQ)	61901	Keratin type II cytoskeletal 1b OS=Homo sapiens OX=9606 GN=KRT77 PE=2 SV=3
79	1226	sp|Q01546|K22O_HUMAN	198.17	14	13	14	10	9					25	0	57	67	37	42	Carbamidomethylation; Oxidation (M); Deamidation (NQ)	65841	Keratin type II cytoskeletal 2 oral OS=Homo sapiens OX=9606 GN=KRT76 PE=1 SV=2
466	395	tr|H7BXI1|H7BXI1_HUMAN	198.14	22	0	0	20	17			13900000	6100000	16	16	0	0	19	14		98010	Extended synaptotagmin-2 (Fragment) OS=Homo sapiens OX=9606 GN=ESYT2 PE=1 SV=1
211	1758	sp|Q8IUE6|H2A2B_HUMAN	198.05	63	48	58	37	32	2160000	2400000		2600000	14	1	20	18	25	30	Deamidation (NQ)	13995	Histone H2A type 2-B OS=Homo sapiens OX=9606 GN=HIST2H2AB PE=1 SV=3
414	590	sp|P53618|COPB_HUMAN	197.9	18	1	0	18	11	15500		12900000	6370000	15	15	1	0	23	15	Carbamidomethylation; Oxidation (M); Deamidation (NQ)	107142	Coatomer subunit beta OS=Homo sapiens OX=9606 GN=COPB1 PE=1 SV=3
251	449	sp|Q92922|SMRC1_HUMAN	197.84	20	0	0	18	16			6880000	6610000	25	11	0	0	38	32	Carbamidomethylation; Oxidation (M); Deamidation (NQ)	122867	SWI/SNF complex subunit SMARCC1 OS=Homo sapiens OX=9606 GN=SMARCC1 PE=1 SV=3
396	356	sp|Q5QJE6|TDIF2_HUMAN	197.66	28	0	0	28	22			23700000	14400000	17	17	0	0	23	18	Carbamidomethylation; Oxidation (M); Deamidation (NQ)	84469	Deoxynucleotidyltransferase terminal-interacting protein 2 OS=Homo sapiens OX=9606 GN=DNTTIP2 PE=1 SV=2
383	601	sp|Q05D32|CTSL2_HUMAN	197.36	31	0	0	28	31			33700000	66400000	15	15	0	0	19	23	Deamidation (NQ)	52999	CTD small phosphatase-like protein 2 OS=Homo sapiens OX=9606 GN=CTDSPL2 PE=1 SV=2
254	729	sp|Q14204|DYHC1_HUMAN	197.36	9	0	1	8	4	818000	1720000	12400000	5150000	42	42	1	3	49	26	Carbamidomethylation; Oxidation (M); Deamidation (NQ)	532412	Cytoplasmic dynein 1 heavy chain 1 OS=Homo sapiens OX=9606 GN=DYNC1H1 PE=1 SV=5
223	643	tr|E9PCY7|E9PCY7_HUMAN	196.7	33	30	30	23	26	2800000	3610000	7290000	6470000	12	7	24	24	13	18	Carbamidomethylation; Acetylation (Protein N-term); Oxidation (M); Deamidation (NQ)	47087	Heterogeneous nuclear ribonucleoprotein H OS=Homo sapiens OX=9606 GN=HNRNPH1 PE=1 SV=1
223	644	sp|P31943|HNRH1_HUMAN	196.7	31	29	29	22	24	2800000	3610000	7290000	6470000	12	7	24	24	13	18	Carbamidomethylation; Acetylation (Protein N-term); Oxidation (M); Deamidation (NQ)	49229	Heterogeneous nuclear ribonucleoprotein H OS=Homo sapiens OX=9606 GN=HNRNPH1 PE=1 SV=4
223	646	tr|G8JLB6|G8JLB6_HUMAN	196.7	30	27	27	21	23	2800000	3610000	7290000	6470000	12	7	24	24	13	18	Carbamidomethylation; Acetylation (Protein N-term); Oxidation (M); Deamidation (NQ)	51230	Heterogeneous nuclear ribonucleoprotein H OS=Homo sapiens OX=9606 GN=HNRNPH1 PE=1 SV=1
655	1027	sp|O95232|LC7L3_HUMAN	196.64	29	0	0	29	16			23700000	6390000	13	13	0	0	15	6	Carbamidomethylation; Deamidation (NQ)	51466	Luc7-like protein 3 OS=Homo sapiens OX=9606 GN=LUC7L3 PE=1 SV=2
674	1339	sp|P42166|LAP2A_HUMAN	196.43	17	2	4	17	12			546000		9	2	1	2	11	5		75492	Lamina-associated polypeptide 2 isoform alpha OS=Homo sapiens OX=9606 GN=TMPO PE=1 SV=2
348	489	sp|O95758|PTBP3_HUMAN	196.29	30	5	5	30	16			19100000	5780000	19	11	4	4	27	15	Carbamidomethylation; Oxidation (M); Deamidation (NQ)	59690	Polypyrimidine tract-binding protein 3 OS=Homo sapiens OX=9606 GN=PTBP3 PE=1 SV=2
459	447	sp|Q14566|MCM6_HUMAN	196.25	24	1	1	19	13	402000	2320000	10500000	3040000	20	20	1	1	21	10	Carbamidomethylation	92889	DNA replication licensing factor MCM6 OS=Homo sapiens OX=9606 GN=MCM6 PE=1 SV=1
509	524	sp|Q9UPQ9|TNR6B_HUMAN	196.17	15	0	0	5	15			4870000	11800000	18	18	0	0	8	23	Oxidation (M); Deamidation (NQ)	194001	Trinucleotide repeat-containing gene 6B protein OS=Homo sapiens OX=9606 GN=TNRC6B PE=1 SV=4
266	440	tr|M0QZM1|M0QZM1_HUMAN	196.12	52	6	18	35	43				2790000	21	1	4	10	31	31	Oxidation (M); Deamidation (NQ)	40052	Heterogeneous nuclear ribonucleoprotein M (Fragment) OS=Homo sapiens OX=9606 GN=HNRNPM PE=1 SV=1
503	384	sp|Q9UJS0|CMC2_HUMAN	196	39	0	0	7	39			299000	26200000	23	16	0	0	6	24	Carbamidomethylation; Oxidation (M)	74176	Calcium-binding mitochondrial carrier protein Aralar2 OS=Homo sapiens OX=9606 GN=SLC25A13 PE=1 SV=2
474	637	sp|P54727|RD23B_HUMAN	195.86	38	0	0	38	32			36600000	38200000	14	14	0	0	16	15	Oxidation (M)	43171	UV excision repair protein RAD23 homolog B OS=Homo sapiens OX=9606 GN=RAD23B PE=1 SV=1
382	1313	sp|P04406|G3P_HUMAN	195.76	35	30	19	19	16	18000000	2600000	3000000	2130000	12	11	23	9	5	4	Carbamidomethylation; Oxidation (M); Deamidation (NQ)	36053	Glyceraldehyde-3-phosphate dehydrogenase OS=Homo sapiens OX=9606 GN=GAPDH PE=1 SV=3
287	654	sp|O43790|KRT86_HUMAN	195.57	42	5	42	3	5		301000			23	1	5	45	4	5	Carbamidomethylation; Oxidation (M); Deamidation (NQ)	53501	Keratin type II cuticular Hb6 OS=Homo sapiens OX=9606 GN=KRT86 PE=1 SV=1
422	535	sp|Q6KC79|NIPBL_HUMAN	195.36	9	0	1	7	5	141000	52000	24500000	7690000	23	23	1	1	20	16	Carbamidomethylation	316051	Nipped-B-like protein OS=Homo sapiens OX=9606 GN=NIPBL PE=1 SV=2
522	540	sp|P51610|HCFC1_HUMAN	194.83	11	0	0	10	5	191000	296000	10700000	3990000	20	20	1	1	21	10	Carbamidomethylation; Deamidation (NQ)	208730	Host cell factor 1 OS=Homo sapiens OX=9606 GN=HCFC1 PE=1 SV=2
522	542	tr|A6NEM2|A6NEM2_HUMAN	194.83	11	0	0	10	5	191000	296000	10700000	3990000	20	20	1	1	21	10	Carbamidomethylation; Deamidation (NQ)	213474	Host cell factor 1 OS=Homo sapiens OX=9606 GN=HCFC1 PE=1 SV=2
805	1034	sp|P16989|YBOX3_HUMAN	194.53	36	2	0	36	7			13600000	917000	9	6	1	0	10	2	Oxidation (M); Deamidation (NQ)	40090	Y-box-binding protein 3 OS=Homo sapiens OX=9606 GN=YBX3 PE=1 SV=4
416	386	sp|P54136|SYRC_HUMAN	194.47	37	0	2	19	35		119000	5730000	42000000	21	21	0	1	12	27	Carbamidomethylation; Deamidation (NQ)	75379	Arginine--tRNA ligase cytoplasmic OS=Homo sapiens OX=9606 GN=RARS PE=1 SV=2
462	421	sp|Q9NPF5|DMAP1_HUMAN	194.44	41	0	0	41	30			17600000	6160000	14	14	0	0	17	12	Deamidation (NQ)	52993	DNA methyltransferase 1-associated protein 1 OS=Homo sapiens OX=9606 GN=DMAP1 PE=1 SV=1
302	463	tr|J3KR24|J3KR24_HUMAN	194.39	23	1	0	19	16	106000		16800000	5070000	27	27	1	0	35	22	Carbamidomethylation; Oxidation (M); Deamidation (NQ)	131763	Isoleucine--tRNA ligase cytoplasmic OS=Homo sapiens OX=9606 GN=IARS PE=1 SV=1
302	465	tr|A0A0A0MSX9|A0A0A0MSX9_HUMAN	194.39	21	1	0	18	15	106000		16800000	5070000	27	27	1	0	35	22	Carbamidomethylation; Oxidation (M); Deamidation (NQ)	142288	Isoleucine--tRNA ligase cytoplasmic OS=Homo sapiens OX=9606 GN=IARS PE=1 SV=1
302	466	sp|P41252|SYIC_HUMAN	194.39	21	1	0	18	15	106000		16800000	5070000	27	27	1	0	35	22	Carbamidomethylation; Oxidation (M); Deamidation (NQ)	144498	Isoleucine--tRNA ligase cytoplasmic OS=Homo sapiens OX=9606 GN=IARS PE=1 SV=2
484	618	sp|Q93084|AT2A3_HUMAN	194.29	15	0	0	14	13			5230000	2060000	15	11	0	0	19	14	Carbamidomethylation; Acetylation (Protein N-term); Oxidation (M)	113977	Sarcoplasmic/endoplasmic reticulum calcium ATPase 3 OS=Homo sapiens OX=9606 GN=ATP2A3 PE=1 SV=2
520	686	sp|O43172|PRP4_HUMAN	194.26	29	0	0	21	27			21200000	13900000	14	14	0	0	11	16	Carbamidomethylation	58449	U4/U6 small nuclear ribonucleoprotein Prp4 OS=Homo sapiens OX=9606 GN=PRPF4 PE=1 SV=2
648	810	sp|Q99704|DOK1_HUMAN	194.18	33	0	0	33	18			28400000	12900000	12	12	0	0	14	6	Carbamidomethylation; Acetylation (Protein N-term); Oxidation (M)	52392	Docking protein 1 OS=Homo sapiens OX=9606 GN=DOK1 PE=1 SV=1
127	1294	sp|Q16778|H2B2E_HUMAN	194.08	76	67	66	44	52					17	0	41	34	31	37	Oxidation (M); Deamidation (NQ)	13920	Histone H2B type 2-E OS=Homo sapiens OX=9606 GN=HIST2H2BE PE=1 SV=3
475	537	sp|P55265|DSRAD_HUMAN	193.8	17	0	0	15	9			11700000	2930000	21	21	0	0	23	11	Oxidation (M)	136066	Double-stranded RNA-specific adenosine deaminase OS=Homo sapiens OX=9606 GN=ADAR PE=1 SV=4
319	549	sp|Q5T9A4|ATD3B_HUMAN	193.68	30	6	6	25	27					22	0	5	4	22	20	Deamidation (NQ)	72573	ATPase family AAA domain-containing protein 3B OS=Homo sapiens OX=9606 GN=ATAD3B PE=1 SV=1
450	661	sp|Q92769|HDAC2_HUMAN	193.55	26	5	2	22	21			11700000	6020000	11	5	3	1	14	15	Carbamidomethylation; Oxidation (M)	55364	Histone deacetylase 2 OS=Homo sapiens OX=9606 GN=HDAC2 PE=1 SV=2
557	719	sp|Q7Z4V5|HDGR2_HUMAN	193.5	21	0	0	17	14			23400000	12200000	17	15	0	0	16	13	Oxidation (M)	74317	Hepatoma-derived growth factor-related protein 2 OS=Homo sapiens OX=9606 GN=HDGFL2 PE=1 SV=1
373	480	sp|Q6NYC8|PPR18_HUMAN	192.76	33	0	0	33	19			72400000	7560000	21	21	0	0	31	10	Carbamidomethylation; Acetylation (Protein N-term); Deamidation (NQ)	67943	Phostensin OS=Homo sapiens OX=9606 GN=PPP1R18 PE=1 SV=1
367	506	sp|O94776|MTA2_HUMAN	192.75	36	0	0	30	29			20200000	18600000	22	17	0	0	20	21		75023	Metastasis-associated protein MTA2 OS=Homo sapiens OX=9606 GN=MTA2 PE=1 SV=1
591	702	sp|O15213|WDR46_HUMAN	192.7	26	2	0	24	23	45800		9410000	8720000	13	7	1	0	14	10	Carbamidomethylation	68071	WD repeat-containing protein 46 OS=Homo sapiens OX=9606 GN=WDR46 PE=1 SV=3
277	554	sp|Q14444|CAPR1_HUMAN	192.67	25	0	0	18	25			39100000	51600000	20	20	0	0	26	34	Carbamidomethylation; Oxidation (M); Deamidation (NQ)	78366	Caprin-1 OS=Homo sapiens OX=9606 GN=CAPRIN1 PE=1 SV=2
239	486	sp|P38646|GRP75_HUMAN	192.42	34	30	21	12	15	8430000	4500000	9200000	1070000	20	17	37	21	9	10	Oxidation (M); Deamidation (NQ)	73681	Stress-70 protein mitochondrial OS=Homo sapiens OX=9606 GN=HSPA9 PE=1 SV=2
292	683	tr|A0A087X106|A0A087X106_HUMAN	192.27	41	5	41	3	5		146000			22	1	5	43	4	5	Carbamidomethylation; Oxidation (M); Deamidation (NQ)	53116	Keratin type II cuticular Hb1 OS=Homo sapiens OX=9606 GN=KRT81 PE=1 SV=1
292	685	sp|Q14533|KRT81_HUMAN	192.27	39	5	39	3	5		146000			22	1	5	43	4	5	Carbamidomethylation; Oxidation (M); Deamidation (NQ)	54928	Keratin type II cuticular Hb1 OS=Homo sapiens OX=9606 GN=KRT81 PE=1 SV=3
476	764	sp|P22314|UBA1_HUMAN	192.23	16	1	0	13	14	33900		9000000	5390000	15	15	1	0	18	18	Carbamidomethylation; Deamidation (NQ)	117849	Ubiquitin-like modifier-activating enzyme 1 OS=Homo sapiens OX=9606 GN=UBA1 PE=1 SV=3
370	454	sp|P50851|LRBA_HUMAN	192.09	9	1	0	8	5					25	0	2	0	29	15	Carbamidomethylation; Oxidation (M)	319107	Lipopolysaccharide-responsive and beige-like anchor protein OS=Homo sapiens OX=9606 GN=LRBA PE=1 SV=4
108	1007	sp|Q5XKE5|K2C79_HUMAN	191.84	19	15	19	12	11		0			26	1	50	47	33	33	Oxidation (M); Deamidation (NQ)	57836	Keratin type II cytoskeletal 79 OS=Homo sapiens OX=9606 GN=KRT79 PE=1 SV=2
570	770	sp|Q15428|SF3A2_HUMAN	191.47	28	2	0	28	17	70800		18900000	5480000	13	13	1	0	18	7	Carbamidomethylation; Acetylation (Protein N-term); Oxidation (M); Deamidation (NQ)	49256	Splicing factor 3A subunit 2 OS=Homo sapiens OX=9606 GN=SF3A2 PE=1 SV=2
364	444	tr|E9PEM5|E9PEM5_HUMAN	191.37	10	1	0	9	6					24	0	2	0	28	18	Carbamidomethylation; Oxidation (M)	286973	Lipopolysaccharide-responsive and beige-like anchor protein OS=Homo sapiens OX=9606 GN=LRBA PE=1 SV=1
345	620	sp|P52701|MSH6_HUMAN	191.3	16	0	0	14	13			7980000	4200000	23	23	0	0	24	22	Carbamidomethylation	152785	DNA mismatch repair protein Msh6 OS=Homo sapiens OX=9606 GN=MSH6 PE=1 SV=2
327	522	sp|Q14690|RRP5_HUMAN	191.23	16	0	0	12	13			9220000	5330000	28	28	0	0	23	26	Carbamidomethylation; Acetylation (Protein N-term)	208699	Protein RRP5 homolog OS=Homo sapiens OX=9606 GN=PDCD11 PE=1 SV=3
327	523	tr|A0A3B3IUD7|A0A3B3IUD7_HUMAN	191.23	16	0	0	12	13			9220000	5330000	28	28	0	0	23	26	Carbamidomethylation; Acetylation (Protein N-term)	208827	Programmed cell death 11 isoform CRA_a OS=Homo sapiens OX=9606 GN=PDCD11 PE=1 SV=1
481	807	sp|O15371|EIF3D_HUMAN	191.22	22	3	4	21	12	41900	0	37600000	27300000	16	16	1	1	20	8	Carbamidomethylation; Oxidation (M); Deamidation (NQ)	63973	Eukaryotic translation initiation factor 3 subunit D OS=Homo sapiens OX=9606 GN=EIF3D PE=1 SV=1
428	695	sp|Q99613|EIF3C_HUMAN	191.19	19	0	0	16	17			9250000	4800000	19	19	0	0	17	20	Carbamidomethylation; Deamidation (NQ)	105344	Eukaryotic translation initiation factor 3 subunit C OS=Homo sapiens OX=9606 GN=EIF3C PE=1 SV=1
428	696	sp|B5ME19|EIFCL_HUMAN	191.19	19	0	0	16	17			9250000	4800000	19	19	0	0	17	20	Carbamidomethylation; Deamidation (NQ)	105473	Eukaryotic translation initiation factor 3 subunit C-like protein OS=Homo sapiens OX=9606 GN=EIF3CL PE=3 SV=1
479	429	sp|P19525|E2AK2_HUMAN	191.11	29	0	0	11	29			3460000	47800000	17	17	0	0	5	24	Carbamidomethylation	62094	Interferon-induced double-stranded RNA-activated protein kinase OS=Homo sapiens OX=9606 GN=EIF2AK2 PE=1 SV=2
313	478	sp|P11021|BIP_HUMAN	190.92	31	23	16	13	16	2780000	967000	598000	1720000	17	15	20	14	11	10	Oxidation (M)	72333	Endoplasmic reticulum chaperone BiP OS=Homo sapiens OX=9606 GN=HSPA5 PE=1 SV=2
469	692	sp|Q99829|CPNE1_HUMAN	190.44	26	0	2	25	22		16500	21400000	24000000	16	16	0	1	17	14	Oxidation (M)	59059	Copine-1 OS=Homo sapiens OX=9606 GN=CPNE1 PE=1 SV=1
469	693	tr|B0QZ18|B0QZ18_HUMAN	190.44	26	0	2	24	22		16500	21400000	24000000	16	16	0	1	17	14	Oxidation (M)	59718	Copine-1 OS=Homo sapiens OX=9606 GN=CPNE1 PE=1 SV=1
272	784	sp|P17066|HSP76_HUMAN	190.34	19	7	13	19	18					13	0	11	11	23	20	Carbamidomethylation; Deamidation (NQ)	71028	Heat shock 70 kDa protein 6 OS=Homo sapiens OX=9606 GN=HSPA6 PE=1 SV=2
325	564	tr|A0A0D9SF54|A0A0D9SF54_HUMAN	190.28	16	0	0	15	5			571000		36	1	1	1	36	15		282835	Spectrin alpha chain non-erythrocytic 1 OS=Homo sapiens OX=9606 GN=SPTAN1 PE=1 SV=1
325	565	tr|A0A0D9SGF6|A0A0D9SGF6_HUMAN	190.28	16	0	0	14	5			571000		36	1	1	1	36	15		287604	Spectrin alpha chain non-erythrocytic 1 OS=Homo sapiens OX=9606 GN=SPTAN1 PE=1 SV=1
617	669	sp|P35609|ACTN2_HUMAN	190.21	14	0	0	14	5					13	0	0	0	16	5	Carbamidomethylation; Oxidation (M)	103854	Alpha-actinin-2 OS=Homo sapiens OX=9606 GN=ACTN2 PE=1 SV=1
309	442	sp|Q7L576|CYFP1_HUMAN	189.96	16	0	1	15	15		110000	20900000	12300000	20	20	0	1	30	27	Carbamidomethylation; Oxidation (M)	145182	Cytoplasmic FMR1-interacting protein 1 OS=Homo sapiens OX=9606 GN=CYFIP1 PE=1 SV=1
415	699	sp|Q7Z2W4|ZCCHV_HUMAN	189.68	17	0	0	17	11			9210000	5070000	13	13	0	0	20	17	Carbamidomethylation; Acetylation (Protein N-term)	101431	Zinc finger CCCH-type antiviral protein 1 OS=Homo sapiens OX=9606 GN=ZC3HAV1 PE=1 SV=3
564	546	sp|Q15397|PUM3_HUMAN	189.59	23	0	0	22	19			11700000	10200000	14	14	0	0	12	12	Carbamidomethylation; Oxidation (M)	73584	Pumilio homolog 3 OS=Homo sapiens OX=9606 GN=PUM3 PE=1 SV=3
583	513	sp|Q9Y5J1|UTP18_HUMAN	188.36	29	0	0	4	29			840000	27300000	13	13	0	0	2	22	Carbamidomethylation; Oxidation (M); Deamidation (NQ)	62004	U3 small nucleolar RNA-associated protein 18 homolog OS=Homo sapiens OX=9606 GN=UTP18 PE=1 SV=3
273	1030	sp|Q13509|TBB3_HUMAN	187.91	24	21	17	17	14					10	0	19	17	14	15	Carbamidomethylation; Oxidation (M)	50433	Tubulin beta-3 chain OS=Homo sapiens OX=9606 GN=TUBB3 PE=1 SV=2
605	936	sp|P30153|2AAA_HUMAN	187.53	25	0	0	22	19			13000000	10000000	13	13	0	0	13	10	Carbamidomethylation; Oxidation (M)	65309	Serine/threonine-protein phosphatase 2A 65 kDa regulatory subunit A alpha isoform OS=Homo sapiens OX=9606 GN=PPP2R1A PE=1 SV=4
498	574	sp|Q01196|RUNX1_HUMAN	187.41	40	0	2	36	25		0	27500000	10800000	15	15	0	1	19	11	Oxidation (M)	48737	Runt-related transcription factor 1 OS=Homo sapiens OX=9606 GN=RUNX1 PE=1 SV=3
574	425	sp|Q9ULI0|ATD2B_HUMAN	187.35	15	1	0	13	6	437000		5300000	1110000	17	17	1	0	17	8	Carbamidomethylation; Oxidation (M)	164913	ATPase family AAA domain-containing protein 2B OS=Homo sapiens OX=9606 GN=ATAD2B PE=1 SV=3
710	1490	sp|Q6UN15|FIP1_HUMAN	187.08	15	0	0	15	12			23100000	21500000	7	7	0	0	9	8	Oxidation (M)	66526	Pre-mRNA 3'-end-processing factor FIP1 OS=Homo sapiens OX=9606 GN=FIP1L1 PE=1 SV=1
296	690	sp|P14625|ENPL_HUMAN	186.84	22	17	1	17	13	5670000	32500	11300000	14600000	19	15	15	1	21	19		92469	Endoplasmin OS=Homo sapiens OX=9606 GN=HSP90B1 PE=1 SV=1
437	1400	sp|Q07666|KHDR1_HUMAN	186.82	32	3	0	24	29	106000		42800000	54400000	18	18	1	0	19	19	Oxidation (M)	48227	KH domain-containing RNA-binding signal transduction-associated protein 1 OS=Homo sapiens OX=9606 GN=KHDRBS1 PE=1 SV=1
561	598	sp|P28288|ABCD3_HUMAN	185.97	27	0	0	8	25			2020000	27300000	18	18	0	0	5	18	Oxidation (M); Deamidation (NQ)	75476	ATP-binding cassette sub-family D member 3 OS=Homo sapiens OX=9606 GN=ABCD3 PE=1 SV=1
81	1436	sp|P05787|K2C8_HUMAN	185.52	19	15	19	12	11					27	0	62	70	39	41	Oxidation (M); Deamidation (NQ)	53704	Keratin type II cytoskeletal 8 OS=Homo sapiens OX=9606 GN=KRT8 PE=1 SV=7
448	474	sp|O94880|PHF14_HUMAN	185.45	16	0	0	15	15			6630000	5150000	14	14	0	0	16	14	Carbamidomethylation	100053	PHD finger protein 14 OS=Homo sapiens OX=9606 GN=PHF14 PE=1 SV=2
448	475	tr|A0A0U1RRH6|A0A0U1RRH6_HUMAN	185.45	15	0	0	14	14			6630000	5150000	14	14	0	0	16	14	Carbamidomethylation	106986	PHD finger protein 14 OS=Homo sapiens OX=9606 GN=PHF14 PE=1 SV=1
454	548	sp|Q9NY93|DDX56_HUMAN	185.11	25	0	0	23	22			26800000	15000000	15	15	0	0	17	14	Oxidation (M)	61590	Probable ATP-dependent RNA helicase DDX56 OS=Homo sapiens OX=9606 GN=DDX56 PE=1 SV=1
439	575	sp|Q13263|TIF1B_HUMAN	184.98	22	0	0	20	16			14000000	6290000	17	16	0	0	21	14	Carbamidomethylation; Acetylation (Protein N-term); Oxidation (M)	88550	Transcription intermediary factor 1-beta OS=Homo sapiens OX=9606 GN=TRIM28 PE=1 SV=5
464	687	tr|H7C3G6|H7C3G6_HUMAN	184.59	54	0	0	54	26			133000		16	1	0	0	25	8	Carbamidomethylation; Oxidation (M); Deamidation (NQ)	32221	Myosin phosphatase Rho-interacting protein (Fragment) OS=Homo sapiens OX=9606 GN=MPRIP PE=1 SV=2
409	464	sp|Q9NW13|RBM28_HUMAN	184.55	24	0	0	24	19			12800000	6930000	18	18	0	0	21	19	Carbamidomethylation; Acetylation (Protein N-term)	85738	RNA-binding protein 28 OS=Homo sapiens OX=9606 GN=RBM28 PE=1 SV=3
482	736	sp|P16615|AT2A2_HUMAN	184.11	13	0	0	11	9			4640000	2570000	13	9	0	0	18	13	Carbamidomethylation; Oxidation (M)	114757	Sarcoplasmic/endoplasmic reticulum calcium ATPase 2 OS=Homo sapiens OX=9606 GN=ATP2A2 PE=1 SV=1
196	1025	sp|Q86Y46|K2C73_HUMAN	183.93	19	15	16	9	9		141000			21	1	31	28	22	24	Carbamidomethylation; Deamidation (NQ)	58923	Keratin type II cytoskeletal 73 OS=Homo sapiens OX=9606 GN=KRT73 PE=1 SV=1
586	1028	sp|O15131|IMA6_HUMAN	183.85	21	0	0	20	18			113000	193000	13	1	0	0	12	11	Carbamidomethylation; Oxidation (M); Deamidation (NQ)	60349	Importin subunit alpha-6 OS=Homo sapiens OX=9606 GN=KPNA5 PE=1 SV=2
854	1129	sp|Q9Y6G9|DC1L1_HUMAN	183.18	22	0	0	19	10			7840000	1190000	8	8	0	0	7	4		56579	Cytoplasmic dynein 1 light intermediate chain 1 OS=Homo sapiens OX=9606 GN=DYNC1LI1 PE=1 SV=3
449	759	tr|F8WJN3|F8WJN3_HUMAN	183.14	31	0	3	28	26		41100	30000000	22100000	15	15	0	1	18	14	Carbamidomethylation; Oxidation (M)	52270	Cleavage and polyadenylation-specificity factor subunit 6 OS=Homo sapiens OX=9606 GN=CPSF6 PE=1 SV=1
449	760	sp|Q16630|CPSF6_HUMAN	183.14	27	0	3	25	22		41100	30000000	22100000	15	15	0	1	18	14	Carbamidomethylation; Oxidation (M)	59210	Cleavage and polyadenylation specificity factor subunit 6 OS=Homo sapiens OX=9606 GN=CPSF6 PE=1 SV=2
495	708	tr|A0A0R4J2E8|A0A0R4J2E8_HUMAN	182.98	23	0	0	21	13			14600000	10100000	16	16	0	0	19	13	Carbamidomethylation; Deamidation (NQ)	94623	Matrin-3 OS=Homo sapiens OX=9606 GN=MATR3 PE=1 SV=1
495	709	sp|P43243|MATR3_HUMAN	182.98	23	0	0	21	13			14600000	10100000	16	16	0	0	19	13	Carbamidomethylation; Deamidation (NQ)	94623	Matrin-3 OS=Homo sapiens OX=9606 GN=MATR3 PE=1 SV=2
495	712	tr|A8MXP9|A8MXP9_HUMAN	182.98	22	0	0	20	12			14600000	10100000	16	16	0	0	19	13	Carbamidomethylation; Deamidation (NQ)	99967	Matrin-3 OS=Homo sapiens OX=9606 GN=MATR3 PE=1 SV=1
401	453	sp|P31939|PUR9_HUMAN	182.72	37	0	0	29	35			14300000	14600000	18	18	0	0	17	22	Carbamidomethylation; Oxidation (M); Deamidation (NQ)	64616	Bifunctional purine biosynthesis protein PURH OS=Homo sapiens OX=9606 GN=ATIC PE=1 SV=3
405	593	sp|P04040|CATA_HUMAN	182.6	31	6	24	19	17	792000	3660000	8330000	5770000	16	16	5	14	11	10	Carbamidomethylation; Deamidation (NQ)	59756	Catalase OS=Homo sapiens OX=9606 GN=CAT PE=1 SV=3
507	470	sp|Q9UHB6|LIMA1_HUMAN	181.56	30	0	0	29	10			12200000	781000	21	21	0	0	26	6	Oxidation (M)	85226	LIM domain and actin-binding protein 1 OS=Homo sapiens OX=9606 GN=LIMA1 PE=1 SV=1
344	701	sp|Q15323|K1H1_HUMAN	181.42	38	6	38	6	2		908000			16	3	8	26	14	2	Carbamidomethylation; Oxidation (M); Deamidation (NQ)	47237	Keratin type I cuticular Ha1 OS=Homo sapiens OX=9606 GN=KRT31 PE=1 SV=3
625	805	sp|Q9UBU9|NXF1_HUMAN	180.98	20	0	0	13	17			10800000	89100000	13	13	0	0	9	12	Oxidation (M)	70182	Nuclear RNA export factor 1 OS=Homo sapiens OX=9606 GN=NXF1 PE=1 SV=1
408	508	sp|Q92608|DOCK2_HUMAN	180.81	14	0	1	14	8			7460000	4550000	27	25	0	1	31	20	Carbamidomethylation; Oxidation (M); Deamidation (NQ)	211947	Dedicator of cytokinesis protein 2 OS=Homo sapiens OX=9606 GN=DOCK2 PE=1 SV=2
413	507	sp|Q9BZE4|NOG1_HUMAN	180.79	28	0	0	26	24			32500000	27300000	20	20	0	0	22	17	Carbamidomethylation	73965	Nucleolar GTP-binding protein 1 OS=Homo sapiens OX=9606 GN=GTPBP4 PE=1 SV=3
540	707	sp|Q9BSJ8|ESYT1_HUMAN	180.66	14	0	0	12	11			6350000	7240000	13	13	0	0	16	13		122856	Extended synaptotagmin-1 OS=Homo sapiens OX=9606 GN=ESYT1 PE=1 SV=1
318	677	tr|A0A0A0MS51|A0A0A0MS51_HUMAN	180.34	22	5	10	17	20	0	84900	4760000	5200000	17	4	4	9	20	23	Oxidation (M); Deamidation (NQ)	82526	Gelsolin OS=Homo sapiens OX=9606 GN=GSN PE=1 SV=1
318	679	tr|A0A0A0MT01|A0A0A0MT01_HUMAN	180.34	22	5	10	17	19	0	84900	4760000	5200000	17	4	4	9	20	23	Oxidation (M); Deamidation (NQ)	84745	Gelsolin OS=Homo sapiens OX=9606 GN=GSN PE=1 SV=1
318	680	sp|P06396|GELS_HUMAN	180.34	21	5	10	16	19	0	84900	4760000	5200000	17	4	4	9	20	23	Oxidation (M); Deamidation (NQ)	85697	Gelsolin OS=Homo sapiens OX=9606 GN=GSN PE=1 SV=1
636	674	sp|O60306|AQR_HUMAN	180.29	13	0	0	10	8			9750000	2980000	19	18	0	0	16	10	Oxidation (M); Deamidation (NQ)	171294	RNA helicase aquarius OS=Homo sapiens OX=9606 GN=AQR PE=1 SV=4
547	722	sp|Q13564|ULA1_HUMAN	180.27	32	2	4	27	19	21900	77000	17100000	11400000	16	16	2	2	14	11	Carbamidomethylation; Oxidation (M); Deamidation (NQ)	60246	NEDD8-activating enzyme E1 regulatory subunit OS=Homo sapiens OX=9606 GN=NAE1 PE=1 SV=1
389	555	sp|Q96MU7|YTDC1_HUMAN	180.02	23	0	0	18	22			23700000	13800000	18	18	0	0	18	26	Oxidation (M); Deamidation (NQ)	84700	YTH domain-containing protein 1 OS=Homo sapiens OX=9606 GN=YTHDC1 PE=1 SV=3
389	559	tr|J3QR07|J3QR07_HUMAN	180.02	22	0	0	18	21			23700000	13700000	17	17	0	0	18	25	Oxidation (M); Deamidation (NQ)	85587	YTH domain-containing protein 1 OS=Homo sapiens OX=9606 GN=YTHDC1 PE=1 SV=1
480	633	sp|Q9NYH9|UTP6_HUMAN	179.78	27	2	0	17	25	44800		11500000	24400000	18	18	1	0	12	18	Carbamidomethylation; Acetylation (Protein N-term); Oxidation (M)	70194	U3 small nucleolar RNA-associated protein 6 homolog OS=Homo sapiens OX=9606 GN=UTP6 PE=2 SV=2
361	656	sp|Q14137|BOP1_HUMAN	179.64	22	0	1	21	18		19900	20000000	23400000	15	15	0	1	21	24	Carbamidomethylation; Deamidation (NQ)	83630	Ribosome biogenesis protein BOP1 OS=Homo sapiens OX=9606 GN=BOP1 PE=1 SV=2
677	577	sp|Q9NSD9|SYFB_HUMAN	179.62	24	0	0	7	24			1100000	16300000	15	15	0	0	4	15	Carbamidomethylation	66116	Phenylalanine--tRNA ligase beta subunit OS=Homo sapiens OX=9606 GN=FARSB PE=1 SV=3
192	1472	sp|Q7RTS7|K2C74_HUMAN	179.52	15	13	13	9	10					19	0	31	29	20	26	Carbamidomethylation; Oxidation (M); Deamidation (NQ)	57865	Keratin type II cytoskeletal 74 OS=Homo sapiens OX=9606 GN=KRT74 PE=1 SV=2
192	1473	tr|F8W1S1|F8W1S1_HUMAN	179.52	15	13	13	9	9					19	0	31	29	20	26	Carbamidomethylation; Oxidation (M); Deamidation (NQ)	59407	Keratin type II cytoskeletal 74 OS=Homo sapiens OX=9606 GN=KRT74 PE=1 SV=1
551	589	sp|Q9UBC3|DNM3B_HUMAN	179.43	18	0	1	17	9			10200000	2810000	13	9	0	1	16	8	Carbamidomethylation; Oxidation (M)	95751	DNA (cytosine-5)-methyltransferase 3B OS=Homo sapiens OX=9606 GN=DNMT3B PE=1 SV=1
584	494	sp|Q16822|PCKGM_HUMAN	179.31	29	0	0	5	29			1650000	19700000	16	16	0	0	3	19	Carbamidomethylation; Oxidation (M)	70699	Phosphoenolpyruvate carboxykinase [GTP] mitochondrial OS=Homo sapiens OX=9606 GN=PCK2 PE=1 SV=4
314	865	sp|P01023|A2MG_HUMAN	179.2	9	0	0	6	9				554000	16	1	0	0	19	31	Carbamidomethylation; Oxidation (M)	163290	Alpha-2-macroglobulin OS=Homo sapiens OX=9606 GN=A2M PE=1 SV=3
399	580	sp|P29590|PML_HUMAN	178.58	18	0	1	17	14		6380	13900000	5870000	15	15	0	1	27	16	Carbamidomethylation	97551	Protein PML OS=Homo sapiens OX=9606 GN=PML PE=1 SV=3
353	678	sp|O14980|XPO1_HUMAN	178.28	18	1	0	16	15	6120000		18100000	9830000	19	18	1	0	27	22	Acetylation (Protein N-term); Oxidation (M); Deamidation (NQ)	123386	Exportin-1 OS=Homo sapiens OX=9606 GN=XPO1 PE=1 SV=1
508	551	tr|A9Z1X7|A9Z1X7_HUMAN	178.26	20	1	0	13	16	12400		7320000	15100000	17	17	1	0	12	19	Acetylation (Protein N-term); Oxidation (M)	103390	Serine/arginine repetitive matrix protein 1 OS=Homo sapiens OX=9606 GN=SRRM1 PE=1 SV=1
601	641	sp|Q8N163|CCAR2_HUMAN	177.65	18	0	0	15	18			5280000	2540000	15	14	0	0	13	14	Oxidation (M)	102902	Cell cycle and apoptosis regulator protein 2 OS=Homo sapiens OX=9606 GN=CCAR2 PE=1 SV=2
695	1077	sp|Q06330|SUH_HUMAN	177.37	19	0	0	19	12			11600000	3350000	10	10	0	0	13	5	Carbamidomethylation	55637	Recombining binding protein suppressor of hairless OS=Homo sapiens OX=9606 GN=RBPJ PE=1 SV=3
336	570	sp|Q9C0J8|WDR33_HUMAN	176.95	16	0	0	14	12			13600000	6240000	19	19	0	0	25	21	Carbamidomethylation; Oxidation (M); Deamidation (NQ)	145891	pre-mRNA 3' end processing protein WDR33 OS=Homo sapiens OX=9606 GN=WDR33 PE=1 SV=2
762	2252	sp|O43670|ZN207_HUMAN	176.52	13	0	0	13	5			32200000	7750000	7	7	0	0	11	3		50751	BUB3-interacting and GLEBS motif-containing protein ZNF207 OS=Homo sapiens OX=9606 GN=ZNF207 PE=1 SV=1
762	2253	tr|J3QRS9|J3QRS9_HUMAN	176.52	12	0	0	12	5			32200000	7750000	7	7	0	0	11	3		52542	BUB3-interacting and GLEBS motif-containing protein ZNF207 OS=Homo sapiens OX=9606 GN=ZNF207 PE=1 SV=1
762	2291	tr|X6R4W8|X6R4W8_HUMAN	176.52	12	0	0	12	5			32200000	7750000	7	7	0	0	11	3		52659	BUB3-interacting and GLEBS motif-containing protein ZNF207 OS=Homo sapiens OX=9606 GN=ZNF207 PE=1 SV=1
622	766	sp|Q9BWE0|REPI1_HUMAN	176.05	24	0	0	20	17			15600000	15200000	12	12	0	0	13	10	Carbamidomethylation	63575	Replication initiator 1 OS=Homo sapiens OX=9606 GN=REPIN1 PE=1 SV=1
784	920	sp|Q8WU90|ZC3HF_HUMAN	175.89	29	0	0	29	12			13000000	1540000	9	9	0	0	10	3	Carbamidomethylation	48603	Zinc finger CCCH domain-containing protein 15 OS=Homo sapiens OX=9606 GN=ZC3H15 PE=1 SV=1
129	880	sp|P19012|K1C15_HUMAN	175.67	29	24	18	12	14	17600	28300			22	2	46	31	38	29	Oxidation (M); Deamidation (NQ)	49212	Keratin type I cytoskeletal 15 OS=Homo sapiens OX=9606 GN=KRT15 PE=1 SV=3
555	813	sp|P49750|YLPM1_HUMAN	175.59	9	1	0	4	7	0		3600000	4060000	15	15	1	0	10	19		241643	YLP motif-containing protein 1 OS=Homo sapiens OX=9606 GN=YLPM1 PE=1 SV=4
500	621	sp|P27694|RFA1_HUMAN	175.43	34	0	2	18	30		0	9410000	18200000	17	17	0	1	13	18	Carbamidomethylation; Oxidation (M); Deamidation (NQ)	68138	Replication protein A 70 kDa DNA-binding subunit OS=Homo sapiens OX=9606 GN=RPA1 PE=1 SV=2
311	642	sp|Q92888|ARHG1_HUMAN	175.42	25	0	0	23	17			13700000	8880000	21	21	0	0	28	24	Carbamidomethylation; Oxidation (M); Deamidation (NQ)	102435	Rho guanine nucleotide exchange factor 1 OS=Homo sapiens OX=9606 GN=ARHGEF1 PE=1 SV=2
311	645	tr|M0QZR4|M0QZR4_HUMAN	175.42	23	0	0	22	16			13700000	8880000	21	21	0	0	28	24	Carbamidomethylation; Oxidation (M); Deamidation (NQ)	108324	Rho guanine nucleotide exchange factor 1 OS=Homo sapiens OX=9606 GN=ARHGEF1 PE=1 SV=1
529	814	sp|Q7Z3D6|GLUCM_HUMAN	174.7	24	1	3	21	20	709000	595000	13800000	11700000	13	13	2	3	17	9	Oxidation (M); Deamidation (NQ)	66437	D-glutamate cyclase mitochondrial OS=Homo sapiens OX=9606 GN=DGLUCY PE=1 SV=2
461	519	sp|Q99459|CDC5L_HUMAN	174.56	23	1	4	18	13	351000	451000	12200000	5350000	18	18	1	2	23	13	Carbamidomethylation; Deamidation (NQ)	92251	Cell division cycle 5-like protein OS=Homo sapiens OX=9606 GN=CDC5L PE=1 SV=2
458	529	tr|H0YAC6|H0YAC6_HUMAN	174.5	13	0	0	12	7					17	0	0	0	21	13	Carbamidomethylation	166920	Lipopolysaccharide-responsive and beige-like anchor protein (Fragment) OS=Homo sapiens OX=9606 GN=LRBA PE=1 SV=1
514	742	tr|A0A0J9YYL3|A0A0J9YYL3_HUMAN	174.42	30	3	2	28	24	183000	68600	19100000	8920000	12	12	2	1	13	12	Oxidation (M)	54627	Poly(U)-binding-splicing factor PUF60 (Fragment) OS=Homo sapiens OX=9606 GN=PUF60 PE=1 SV=1
514	743	tr|A0A0J9YXJ8|A0A0J9YXJ8_HUMAN	174.42	29	3	2	27	24	183000	68600	19100000	8920000	12	12	2	1	13	12	Oxidation (M)	56331	Poly(U)-binding-splicing factor PUF60 (Fragment) OS=Homo sapiens OX=9606 GN=PUF60 PE=1 SV=1
514	744	tr|A0A0J9YVP6|A0A0J9YVP6_HUMAN	174.42	29	3	2	27	23	183000	68600	19100000	8920000	12	12	2	1	13	12	Oxidation (M)	57399	Poly(U)-binding-splicing factor PUF60 (Fragment) OS=Homo sapiens OX=9606 GN=PUF60 PE=1 SV=1
514	745	tr|A0A0J9YXX5|A0A0J9YXX5_HUMAN	174.42	28	3	2	26	22	183000	68600	19100000	8920000	12	12	2	1	13	12	Oxidation (M)	59103	Poly(U)-binding-splicing factor PUF60 (Fragment) OS=Homo sapiens OX=9606 GN=PUF60 PE=1 SV=1
514	746	sp|Q9UHX1|PUF60_HUMAN	174.42	27	3	2	25	22	183000	68600	19100000	8920000	12	12	2	1	13	12	Oxidation (M)	59876	Poly(U)-binding-splicing factor PUF60 OS=Homo sapiens OX=9606 GN=PUF60 PE=1 SV=1
417	756	sp|P07237|PDIA1_HUMAN	174.4	32	19	13	19	22	3860000	416000	4240000	3630000	16	16	10	8	10	11	Oxidation (M)	57116	Protein disulfide-isomerase OS=Homo sapiens OX=9606 GN=P4HB PE=1 SV=3
612	991	tr|F6QDS0|F6QDS0_HUMAN	174.22	26	0	5	20	14		2070000	16200000	4190000	12	12	0	1	15	8	Carbamidomethylation; Acetylation (Protein N-term); Oxidation (M); Deamidation (NQ)	54018	HCG2043426 isoform CRA_b OS=Homo sapiens OX=9606 GN=hCG_2043426 PE=1 SV=1
612	993	tr|I3L0H8|I3L0H8_HUMAN	174.22	22	0	0	22	15			16200000	4190000	11	11	0	0	15	8	Carbamidomethylation; Oxidation (M); Deamidation (NQ)	50520	ATP-dependent RNA helicase DDX19A OS=Homo sapiens OX=9606 GN=DDX19A PE=1 SV=1
612	994	sp|Q9NUU7|DD19A_HUMAN	174.22	21	0	0	21	14			16200000	4190000	11	11	0	0	15	8	Carbamidomethylation; Oxidation (M); Deamidation (NQ)	53975	ATP-dependent RNA helicase DDX19A OS=Homo sapiens OX=9606 GN=DDX19A PE=1 SV=1
535	809	sp|O75083|WDR1_HUMAN	173.9	30	0	1	16	30		45400	12700000	57700000	16	16	0	1	9	19	Carbamidomethylation; Deamidation (NQ)	66194	WD repeat-containing protein 1 OS=Homo sapiens OX=9606 GN=WDR1 PE=1 SV=4
494	602	sp|Q86YV0|RASL3_HUMAN	173.69	13	0	0	12	11			6050000	4100000	12	12	0	0	16	15	Carbamidomethylation	111898	RAS protein activator like-3 OS=Homo sapiens OX=9606 GN=RASAL3 PE=1 SV=2
447	849	tr|A0A0A0MTR7|A0A0A0MTR7_HUMAN	173.54	5	0	0	5	1	32300		4010000	873000	25	23	1	0	26	9	Carbamidomethylation	591416	E3 ubiquitin-protein ligase RNF213 OS=Homo sapiens OX=9606 GN=RNF213 PE=1 SV=1
447	851	tr|A0A0A0MTC1|A0A0A0MTC1_HUMAN	173.54	5	0	0	5	1	32300		4010000	873000	25	23	1	0	26	9	Carbamidomethylation	596495	E3 ubiquitin-protein ligase RNF213 OS=Homo sapiens OX=9606 GN=RNF213 PE=1 SV=1
523	586	sp|Q9P2J5|SYLC_HUMAN	173.41	12	1	0	11	11	0		5820000	2540000	13	12	1	0	16	13	Deamidation (NQ)	134466	Leucine--tRNA ligase cytoplasmic OS=Homo sapiens OX=9606 GN=LARS PE=1 SV=2
378	800	sp|P07814|SYEP_HUMAN	173.06	19	0	0	16	12			13100000	6920000	24	24	0	0	32	19	Carbamidomethylation; Oxidation (M); Deamidation (NQ)	170590	Bifunctional glutamate/proline--tRNA ligase OS=Homo sapiens OX=9606 GN=EPRS PE=1 SV=5
214	1337	sp|Q3SY84|K2C71_HUMAN	172.79	14	11	13	9	9					18	0	29	26	20	22	Oxidation (M); Deamidation (NQ)	57292	Keratin type II cytoskeletal 71 OS=Homo sapiens OX=9606 GN=KRT71 PE=1 SV=3
441	1051	sp|P20742|PZP_HUMAN	172.78	7	0	0	6	6					12	0	0	0	13	20	Carbamidomethylation; Oxidation (M)	163862	Pregnancy zone protein OS=Homo sapiens OX=9606 GN=PZP PE=1 SV=4
707	1346	sp|Q7LDG7|GRP2_HUMAN	172.61	18	2	0	14	9	0		11700000	8180000	11	11	1	0	11	7	Carbamidomethylation	69249	RAS guanyl-releasing protein 2 OS=Homo sapiens OX=9606 GN=RASGRP2 PE=1 SV=1
342	856	sp|Q14525|KT33B_HUMAN	172.58	35	6	35	6	4		859000			14	3	8	24	14	4	Carbamidomethylation; Oxidation (M)	46214	Keratin type I cuticular Ha3-II OS=Homo sapiens OX=9606 GN=KRT33B PE=1 SV=3
543	806	sp|Q13573|SNW1_HUMAN	172.31	26	0	0	16	25			5460000	17000000	15	15	0	0	12	15		61495	SNW domain-containing protein 1 OS=Homo sapiens OX=9606 GN=SNW1 PE=1 SV=1
490	754	tr|A0A2R8YD40|A0A2R8YD40_HUMAN	172.16	13	0	0	9	12			8010000	3940000	18	13	0	0	15	19	Oxidation (M); Deamidation (NQ)	170594	Chromodomain-helicase-DNA-binding protein 4 (Fragment) OS=Homo sapiens OX=9606 GN=CHD4 PE=1 SV=1
490	758	tr|A0A2R8YDJ9|A0A2R8YDJ9_HUMAN	172.16	13	0	0	8	11			8010000	3940000	18	13	0	0	15	19	Oxidation (M); Deamidation (NQ)	178689	Chromodomain-helicase-DNA-binding protein 4 (Fragment) OS=Homo sapiens OX=9606 GN=CHD4 PE=1 SV=1
490	771	tr|A0A2R8Y5J0|A0A2R8Y5J0_HUMAN	172.16	11	0	0	8	9			8140000	3940000	19	14	0	0	16	19	Oxidation (M); Deamidation (NQ)	215721	Chromodomain-helicase-DNA-binding protein 4 OS=Homo sapiens OX=9606 GN=CHD4 PE=1 SV=1
490	772	tr|A0A2R8Y425|A0A2R8Y425_HUMAN	172.16	11	0	0	8	9			8140000	3940000	19	14	0	0	16	19	Oxidation (M); Deamidation (NQ)	215614	Chromodomain-helicase-DNA-binding protein 4 (Fragment) OS=Homo sapiens OX=9606 GN=CHD4 PE=1 SV=1
490	773	tr|A0A2R8YFK9|A0A2R8YFK9_HUMAN	172.16	11	0	0	7	9			8140000	3940000	19	14	0	0	16	19	Oxidation (M); Deamidation (NQ)	216622	Chromodomain-helicase-DNA-binding protein 4 OS=Homo sapiens OX=9606 GN=CHD4 PE=1 SV=1
490	774	tr|A0A2R8YFD8|A0A2R8YFD8_HUMAN	172.16	11	0	0	7	9			8140000	3940000	19	14	0	0	16	19	Oxidation (M); Deamidation (NQ)	216843	Chromodomain-helicase-DNA-binding protein 4 OS=Homo sapiens OX=9606 GN=CHD4 PE=1 SV=1
490	775	tr|F5GWX5|F5GWX5_HUMAN	172.16	11	0	0	7	9			8140000	3940000	19	14	0	0	16	19	Oxidation (M); Deamidation (NQ)	217102	Chromodomain-helicase-DNA-binding protein 4 OS=Homo sapiens OX=9606 GN=CHD4 PE=1 SV=1
490	776	tr|A0A2U3TZM0|A0A2U3TZM0_HUMAN	172.16	11	0	0	7	9			8140000	3940000	19	14	0	0	16	19	Oxidation (M); Deamidation (NQ)	216879	Chromodomain-helicase-DNA-binding protein 4 OS=Homo sapiens OX=9606 GN=CHD4 PE=1 SV=1
490	778	sp|Q14839|CHD4_HUMAN	172.16	11	0	0	7	9			8140000	3940000	19	14	0	0	16	19	Oxidation (M); Deamidation (NQ)	218003	Chromodomain-helicase-DNA-binding protein 4 OS=Homo sapiens OX=9606 GN=CHD4 PE=1 SV=2
490	779	tr|A0A2R8Y212|A0A2R8Y212_HUMAN	172.16	11	0	0	7	9			8140000	3940000	19	14	0	0	16	19	Oxidation (M); Deamidation (NQ)	218188	Chromodomain-helicase-DNA-binding protein 4 OS=Homo sapiens OX=9606 GN=CHD4 PE=1 SV=1
490	780	tr|A0A2R8Y521|A0A2R8Y521_HUMAN	172.16	11	0	0	7	9			8140000	3940000	19	14	0	0	16	19	Oxidation (M); Deamidation (NQ)	218564	Chromodomain-helicase-DNA-binding protein 4 OS=Homo sapiens OX=9606 GN=CHD4 PE=1 SV=1
490	781	tr|A0A0C4DGG9|A0A0C4DGG9_HUMAN	172.16	11	0	0	7	9			8140000	3940000	19	14	0	0	16	19	Oxidation (M); Deamidation (NQ)	220474	Chromodomain-helicase-DNA-binding protein 4 OS=Homo sapiens OX=9606 GN=CHD4 PE=1 SV=1
323	613	sp|Q92974|ARHG2_HUMAN	171.89	27	0	0	24	19			22300000	12700000	26	24	0	0	28	23	Carbamidomethylation; Deamidation (NQ)	111543	Rho guanine nucleotide exchange factor 2 OS=Homo sapiens OX=9606 GN=ARHGEF2 PE=1 SV=4
323	615	tr|V9GYM8|V9GYM8_HUMAN	171.89	26	0	0	23	18			22300000	12700000	26	24	0	0	28	23	Carbamidomethylation; Deamidation (NQ)	116071	Rho guanine nucleotide exchange factor 2 OS=Homo sapiens OX=9606 GN=ARHGEF2 PE=1 SV=1
616	816	tr|A0A140TA69|A0A140TA69_HUMAN	171.86	30	6	30	2	2		170000			13	1	4	18	4	2	Carbamidomethylation; Oxidation (M)	49431	Keratin type I cuticular Ha4 OS=Homo sapiens OX=9606 GN=KRT34 PE=3 SV=1
446	822	sp|Q86X55|CARM1_HUMAN	171.81	20	4	1	18	20	52100	49900	26700000	30200000	12	12	2	1	16	15	Carbamidomethylation; Oxidation (M); Deamidation (NQ)	65854	Histone-arginine methyltransferase CARM1 OS=Homo sapiens OX=9606 GN=CARM1 PE=1 SV=3
501	873	sp|Q66K74|MAP1S_HUMAN	171.73	16	1	0	14	9	86800		12200000	4980000	14	14	1	0	18	16	Carbamidomethylation	112211	Microtubule-associated protein 1S OS=Homo sapiens OX=9606 GN=MAP1S PE=1 SV=2
690	975	sp|Q9UH99|SUN2_HUMAN	171.66	15	0	0	15	10			17400000	15400000	10	10	0	0	11	7	Carbamidomethylation	80311	SUN domain-containing protein 2 OS=Homo sapiens OX=9606 GN=SUN2 PE=1 SV=3
630	629	tr|M0QYH2|M0QYH2_HUMAN	171.61	29	0	0	24	21			17300000	12800000	13	13	0	0	12	9	Carbamidomethylation; Oxidation (M)	53640	Bifunctional polynucleotide phosphatase/kinase OS=Homo sapiens OX=9606 GN=PNKP PE=1 SV=1
630	632	sp|Q96T60|PNKP_HUMAN	171.61	27	0	0	23	19			17300000	12800000	13	13	0	0	12	9	Carbamidomethylation; Oxidation (M)	57076	Bifunctional polynucleotide phosphatase/kinase OS=Homo sapiens OX=9606 GN=PNKP PE=1 SV=1
593	821	tr|Q5SWX3|Q5SWX3_HUMAN	171.29	25	0	4	25	17		79000	14100000	6150000	11	11	0	3	14	8	Oxidation (M)	57797	Calcium/calmodulin-dependent protein kinase (CaM kinase) II gamma isoform CRA_n OS=Homo sapiens OX=9606 GN=CAMK2G PE=1 SV=1
593	823	tr|A0A2Q3DQE3|A0A2Q3DQE3_HUMAN	171.29	23	0	4	23	16		79000	14100000	6150000	11	11	0	3	14	8	Oxidation (M)	62165	Calcium/calmodulin-dependent protein kinase (CaM kinase) II gamma isoform CRA_d OS=Homo sapiens OX=9606 GN=CAMK2G PE=1 SV=1
593	824	sp|Q13555|KCC2G_HUMAN	171.29	23	0	4	23	16		79000	14100000	6150000	11	11	0	3	14	8	Oxidation (M)	62607	Calcium/calmodulin-dependent protein kinase type II subunit gamma OS=Homo sapiens OX=9606 GN=CAMK2G PE=1 SV=4
567	767	sp|Q9NVH1|DJC11_HUMAN	170.64	24	0	0	21	22			28000000	25000000	14	14	0	0	15	14	Carbamidomethylation	63278	DnaJ homolog subfamily C member 11 OS=Homo sapiens OX=9606 GN=DNAJC11 PE=1 SV=2
844	839	sp|P31040|SDHA_HUMAN	170.49	18	0	0	0	18				19300000	10	10	0	0	0	12	Carbamidomethylation	72692	Succinate dehydrogenase [ubiquinone] flavoprotein subunit mitochondrial OS=Homo sapiens OX=9606 GN=SDHA PE=1 SV=2
623	904	sp|O75351|VPS4B_HUMAN	170.24	28	3	3	28	15	65900	52600	20400000	9080000	11	11	1	1	11	7	Oxidation (M)	49302	Vacuolar protein sorting-associated protein 4B OS=Homo sapiens OX=9606 GN=VPS4B PE=1 SV=2
365	697	sp|P24928|RPB1_HUMAN	170.15	13	0	0	12	8			9520000	2860000	26	26	0	0	32	17	Carbamidomethylation; Oxidation (M); Deamidation (NQ)	217174	DNA-directed RNA polymerase II subunit RPB1 OS=Homo sapiens OX=9606 GN=POLR2A PE=1 SV=2
379	585	sp|P55160|NCKPL_HUMAN	169.94	15	0	0	15	13			13700000	6390000	18	18	0	0	27	21	Acetylation (Protein N-term); Oxidation (M); Deamidation (NQ)	128153	Nck-associated protein 1-like OS=Homo sapiens OX=9606 GN=NCKAP1L PE=1 SV=3
620	651	sp|Q9NRK6|ABCBA_HUMAN	169.81	19	0	0	14	17			6940000	8280000	13	13	0	0	10	13	Deamidation (NQ)	79148	ATP-binding cassette sub-family B member 10 mitochondrial OS=Homo sapiens OX=9606 GN=ABCB10 PE=1 SV=2
390	1201	sp|Q08188|TGM3_HUMAN	169.8	16	11	14	5	13	2370000	2190000	822000	878000	10	10	11	13	4	11	Carbamidomethylation	76632	Protein-glutamine gamma-glutamyltransferase E OS=Homo sapiens OX=9606 GN=TGM3 PE=1 SV=4
521	1023	sp|Q8IY81|SPB1_HUMAN	169.42	12	0	0	11	10			6510000	4810000	9	9	0	0	12	14	Carbamidomethylation; Deamidation (NQ)	96558	pre-rRNA processing protein FTSJ3 OS=Homo sapiens OX=9606 GN=FTSJ3 PE=1 SV=2
114	1148	sp|P08727|K1C19_HUMAN	168.99	20	20	16	14	14					16	0	53	37	38	21	Oxidation (M); Deamidation (NQ)	44106	Keratin type I cytoskeletal 19 OS=Homo sapiens OX=9606 GN=KRT19 PE=1 SV=4
765	1411	sp|O95429|BAG4_HUMAN	168.93	24	3	0	9	21	53600		2910000	10700000	10	9	1	0	3	10	Oxidation (M)	49594	BAG family molecular chaperone regulator 4 OS=Homo sapiens OX=9606 GN=BAG4 PE=1 SV=1
715	1287	sp|P42768|WASP_HUMAN	168.91	26	0	0	20	23			9450000	7300000	9	9	0	0	9	9		52913	Wiskott-Aldrich syndrome protein OS=Homo sapiens OX=9606 GN=WAS PE=1 SV=4
410	600	sp|B0I1T2|MYO1G_HUMAN	168.79	21	0	0	20	11			14800000	4100000	19	17	0	0	23	16	Carbamidomethylation; Oxidation (M)	116442	Unconventional myosin-Ig OS=Homo sapiens OX=9606 GN=MYO1G PE=1 SV=2
851	1564	sp|P29353|SHC1_HUMAN	168.26	21	2	0	21	6	145000		7180000	2110000	8	8	1	0	8	3	Carbamidomethylation; Oxidation (M); Deamidation (NQ)	62822	SHC-transforming protein 1 OS=Homo sapiens OX=9606 GN=SHC1 PE=1 SV=4
692	948	sp|P10155|RO60_HUMAN	167.47	22	0	2	19	18		14300	9920000	7130000	12	12	0	1	10	10	Carbamidomethylation; Oxidation (M)	60671	60 kDa SS-A/Ro ribonucleoprotein OS=Homo sapiens OX=9606 GN=TROVE2 PE=1 SV=2
667	962	sp|Q8WX92|NELFB_HUMAN	167.01	23	0	0	19	13			8650000	4340000	13	12	0	0	12	8	Oxidation (M)	65697	Negative elongation factor B OS=Homo sapiens OX=9606 GN=NELFB PE=1 SV=1
429	703	sp|O75475|PSIP1_HUMAN	166.97	30	3	1	22	18	1440000	209000	13700000	18100000	19	17	1	1	17	16	Oxidation (M); Deamidation (NQ)	60103	PC4 and SFRS1-interacting protein OS=Homo sapiens OX=9606 GN=PSIP1 PE=1 SV=1
653	671	sp|Q9H845|ACAD9_HUMAN	166.67	28	2	2	19	19	948000	493000	15400000	10600000	15	15	2	1	11	10	Carbamidomethylation; Oxidation (M)	68760	Acyl-CoA dehydrogenase family member 9 mitochondrial OS=Homo sapiens OX=9606 GN=ACAD9 PE=1 SV=1
457	757	sp|O94804|STK10_HUMAN	166.49	16	0	1	15	10		60900	7880000	1650000	16	16	0	2	21	11	Carbamidomethylation; Deamidation (NQ)	112135	Serine/threonine-protein kinase 10 OS=Homo sapiens OX=9606 GN=STK10 PE=1 SV=1
728	1550	sp|Q14498|RBM39_HUMAN	166.22	15	0	1	14	14		0	8330000	13400000	7	7	0	1	7	10	Deamidation (NQ)	59380	RNA-binding protein 39 OS=Homo sapiens OX=9606 GN=RBM39 PE=1 SV=2
728	1555	tr|H0Y4X3|H0Y4X3_HUMAN	166.22	21	0	0	21	21			8330000	13400000	6	6	0	0	7	10	Deamidation (NQ)	36633	RNA-binding protein 39 (Fragment) OS=Homo sapiens OX=9606 GN=RBM39 PE=1 SV=8
842	959	sp|Q4KMQ1|TPRN_HUMAN	166.14	24	0	0	24	1			4710000	0	11	11	0	0	11	1	Deamidation (NQ)	75556	Taperin OS=Homo sapiens OX=9606 GN=TPRN PE=1 SV=2
172	1202	tr|K7EK07|K7EK07_HUMAN	166.08	60	27	35	51	45			977000		20	1	27	24	32	33	Carbamidomethylation; Oxidation (M); Deamidation (NQ)	14914	Histone H3 (Fragment) OS=Homo sapiens OX=9606 GN=H3F3B PE=1 SV=1
172	1203	sp|P84243|H33_HUMAN	166.08	58	26	34	49	44			977000		20	1	27	24	32	33	Carbamidomethylation; Oxidation (M); Deamidation (NQ)	15328	Histone H3.3 OS=Homo sapiens OX=9606 GN=H3F3A PE=1 SV=2
558	666	sp|Q9NZB2|F120A_HUMAN	166.06	17	0	0	15	11			5040000	1670000	15	15	0	0	13	12	Carbamidomethylation	121888	Constitutive coactivator of PPAR-gamma-like protein 1 OS=Homo sapiens OX=9606 GN=FAM120A PE=1 SV=2
169	1205	sp|P68431|H31_HUMAN	166.05	55	26	34	46	51					21	0	27	24	33	34	Carbamidomethylation; Oxidation (M); Deamidation (NQ)	15404	Histone H3.1 OS=Homo sapiens OX=9606 GN=HIST1H3A PE=1 SV=2
169	1206	sp|Q71DI3|H32_HUMAN	166.05	55	26	34	46	51					21	0	27	24	33	34	Carbamidomethylation; Oxidation (M); Deamidation (NQ)	15388	Histone H3.2 OS=Homo sapiens OX=9606 GN=HIST2H3A PE=1 SV=3
556	921	sp|Q96KR1|ZFR_HUMAN	165.06	18	4	1	11	11	1840000	1000000	4370000	2570000	14	14	3	1	13	11	Carbamidomethylation; Oxidation (M); Deamidation (NQ)	117012	Zinc finger RNA-binding protein OS=Homo sapiens OX=9606 GN=ZFR PE=1 SV=2
633	986	sp|Q8IWB1|IPRI_HUMAN	165.03	22	0	0	20	19			8620000	7010000	12	12	0	0	11	10	Oxidation (M)	62060	Inositol 1 4 5-trisphosphate receptor-interacting protein OS=Homo sapiens OX=9606 GN=ITPRIP PE=1 SV=1
576	853	sp|Q99549|MPP8_HUMAN	165.02	15	1	0	14	11	0		5780000	5580000	13	13	1	0	14	10	Carbamidomethylation; Acetylation (Protein N-term); Oxidation (M)	97182	M-phase phosphoprotein 8 OS=Homo sapiens OX=9606 GN=MPHOSPH8 PE=1 SV=2
436	675	sp|Q8NF50|DOCK8_HUMAN	164.92	13	0	0	11	6	103000		6690000	3290000	26	25	1	0	26	14	Carbamidomethylation; Deamidation (NQ)	238527	Dedicator of cytokinesis protein 8 OS=Homo sapiens OX=9606 GN=DOCK8 PE=1 SV=3
596	915	sp|O76009|KT33A_HUMAN	164.78	29	6	29	4	0					12	0	4	18	5	0	Carbamidomethylation; Oxidation (M); Deamidation (NQ)	45940	Keratin type I cuticular Ha3-I OS=Homo sapiens OX=9606 GN=KRT33A PE=2 SV=2
666	797	tr|B9A018|B9A018_HUMAN	164.15	25	0	0	25	11			10000000	3650000	12	12	0	0	14	5	Carbamidomethylation	62044	U4/U6.U5 tri-snRNP-associated protein 2 OS=Homo sapiens OX=9606 GN=USP39 PE=1 SV=1
666	799	sp|Q53GS9|SNUT2_HUMAN	164.15	24	0	0	24	10			10000000	3650000	12	12	0	0	14	5	Carbamidomethylation	65381	U4/U6.U5 tri-snRNP-associated protein 2 OS=Homo sapiens OX=9606 GN=USP39 PE=1 SV=2
347	829	sp|P78386|KRT85_HUMAN	163.99	31	3	30	7	5		1280000	8160000		21	7	4	36	5	5	Carbamidomethylation; Oxidation (M); Deamidation (NQ)	55802	Keratin type II cuticular Hb5 OS=Homo sapiens OX=9606 GN=KRT85 PE=1 SV=1
423	635	sp|Q92621|NU205_HUMAN	163.95	11	0	0	8	8	1910000	0	8940000	4610000	21	21	1	1	22	19	Carbamidomethylation; Oxidation (M); Deamidation (NQ)	227919	Nuclear pore complex protein Nup205 OS=Homo sapiens OX=9606 GN=NUP205 PE=1 SV=3
671	963	sp|P04083|ANXA1_HUMAN	163.87	39	36	0	9	4	4600000		5810000	2210000	13	13	13	0	6	3	Oxidation (M)	38714	Annexin A1 OS=Homo sapiens OX=9606 GN=ANXA1 PE=1 SV=2
632	1066	sp|Q6DD88|ATLA3_HUMAN	163.48	18	0	0	18	13			18000000	10400000	8	8	0	0	9	11	Oxidation (M)	60542	Atlastin-3 OS=Homo sapiens OX=9606 GN=ATL3 PE=1 SV=1
357	739	sp|O95466|FMNL1_HUMAN	163.39	18	0	0	18	9			44300000	7680000	22	21	0	0	33	12	Carbamidomethylation; Oxidation (M)	121853	Formin-like protein 1 OS=Homo sapiens OX=9606 GN=FMNL1 PE=1 SV=3
826	1980	tr|A0A0G2JJL1|A0A0G2JJL1_HUMAN	163	28	0	0	28	22			390000	463000	7	1	0	0	8	4		35787	WD repeat-containing protein 46 (Fragment) OS=Homo sapiens OX=9606 GN=WDR46 PE=1 SV=1
826	1981	tr|A0A140T9L0|A0A140T9L0_HUMAN	163	28	0	0	28	22			390000	463000	7	1	0	0	8	4		35759	WD repeat-containing protein 46 (Fragment) OS=Homo sapiens OX=9606 GN=WDR46 PE=1 SV=1
510	1091	tr|A0A087WVC1|A0A087WVC1_HUMAN	162.68	15	0	0	12	11			1130000	911000	11	7	0	0	13	16	Deamidation (NQ)	82227	ATP-dependent RNA helicase DDX50 OS=Homo sapiens OX=9606 GN=DDX50 PE=1 SV=1
510	1093	sp|Q9BQ39|DDX50_HUMAN	162.68	15	0	0	12	11			1130000	911000	11	7	0	0	13	16	Deamidation (NQ)	82565	ATP-dependent RNA helicase DDX50 OS=Homo sapiens OX=9606 GN=DDX50 PE=1 SV=1
588	826	sp|Q86U86|PB1_HUMAN	162.68	10	1	0	7	6	31600		3380000	2090000	15	14	1	0	13	11	Carbamidomethylation; Oxidation (M); Deamidation (NQ)	192946	Protein polybromo-1 OS=Homo sapiens OX=9606 GN=PBRM1 PE=1 SV=1
644	941	sp|Q86UX7|URP2_HUMAN	162.36	21	1	0	20	9	52900		5780000	1120000	10	10	2	0	11	10		75953	Fermitin family homolog 3 OS=Homo sapiens OX=9606 GN=FERMT3 PE=1 SV=1
572	838	sp|Q9UGU0|TCF20_HUMAN	162.33	9	0	0	4	8	130000	0	6630000	3700000	15	15	1	1	10	16	Carbamidomethylation	211769	Transcription factor 20 OS=Homo sapiens OX=9606 GN=TCF20 PE=1 SV=3
672	1382	tr|B7Z5N5|B7Z5N5_HUMAN	162.25	22	0	0	22	17			13300000	6990000	8	7	0	0	10	10	Carbamidomethylation; Acetylation (Protein N-term)	48669	Mothers against decapentaplegic homolog OS=Homo sapiens OX=9606 GN=SMAD2 PE=1 SV=1
672	1385	sp|Q15796|SMAD2_HUMAN	162.25	20	0	0	20	16			13300000	6990000	8	7	0	0	10	10	Carbamidomethylation; Acetylation (Protein N-term)	52306	Mothers against decapentaplegic homolog 2 OS=Homo sapiens OX=9606 GN=SMAD2 PE=1 SV=1
491	868	sp|Q7Z3K3|POGZ_HUMAN	162.1	15	0	0	11	10			7580000	4110000	18	18	0	0	16	16	Carbamidomethylation; Deamidation (NQ)	155343	Pogo transposable element with ZNF domain OS=Homo sapiens OX=9606 GN=POGZ PE=1 SV=2
426	670	sp|O95782|AP2A1_HUMAN	161.76	18	0	0	16	15			5370000	3190000	16	10	0	0	19	18	Carbamidomethylation; Oxidation (M); Deamidation (NQ)	107546	AP-2 complex subunit alpha-1 OS=Homo sapiens OX=9606 GN=AP2A1 PE=1 SV=3
603	999	sp|P29401|TKT_HUMAN	161.68	20	9	12	14	13	819000	777000	2940000	7430000	10	10	6	7	6	7		67878	Transketolase OS=Homo sapiens OX=9606 GN=TKT PE=1 SV=3
603	1002	tr|A0A0B4J1R6|A0A0B4J1R6_HUMAN	161.68	27	13	16	19	18	819000	777000	2940000	7430000	10	10	6	7	6	7		49910	Transketolase OS=Homo sapiens OX=9606 GN=TKT PE=1 SV=1
506	815	sp|P49792|RBP2_HUMAN	161.37	6	1	0	5	3	216000		2140000	545000	18	7	2	0	18	13	Carbamidomethylation; Oxidation (M)	358201	E3 SUMO-protein ligase RanBP2 OS=Homo sapiens OX=9606 GN=RANBP2 PE=1 SV=2
412	698	sp|Q9Y678|COPG1_HUMAN	161.11	19	0	0	15	15			9380000	5000000	15	12	0	0	20	20	Carbamidomethylation; Oxidation (M)	97718	Coatomer subunit gamma-1 OS=Homo sapiens OX=9606 GN=COPG1 PE=1 SV=1
393	1481	sp|P55795|HNRH2_HUMAN	161.07	19	14	19	10	7		569000			7	2	12	12	7	8	Carbamidomethylation; Oxidation (M); Deamidation (NQ)	49264	Heterogeneous nuclear ribonucleoprotein H2 OS=Homo sapiens OX=9606 GN=HNRNPH2 PE=1 SV=1
221	2034	tr|A0A2R8YFE2|A0A2R8YFE2_HUMAN	161	65	65	65	61	44		0			10	1	23	24	19	17	Acetylation (Protein N-term); Oxidation (M); Deamidation (NQ)	8796	Actin cytoplasmic 1 (Fragment) OS=Homo sapiens OX=9606 GN=ACTB PE=1 SV=1
533	610	sp|Q9Y2L1|RRP44_HUMAN	160.69	17	0	0	17	10			4860000	3050000	15	15	0	0	18	11	Carbamidomethylation	109003	Exosome complex exonuclease RRP44 OS=Homo sapiens OX=9606 GN=DIS3 PE=1 SV=2
602	929	sp|Q92945|FUBP2_HUMAN	160.63	20	0	0	15	16			9270000	10900000	12	10	0	0	10	14	Carbamidomethylation; Oxidation (M)	73115	Far upstream element-binding protein 2 OS=Homo sapiens OX=9606 GN=KHSRP PE=1 SV=4
602	930	tr|A0A087WTP3|A0A087WTP3_HUMAN	160.63	20	0	0	15	16			9270000	10900000	12	10	0	0	10	14	Carbamidomethylation; Oxidation (M)	73028	Far upstream element-binding protein 2 OS=Homo sapiens OX=9606 GN=KHSRP PE=1 SV=1
337	1001	sp|Q14103|HNRPD_HUMAN	160.43	33	26	19	23	18	4050000	3470000	13700000	12700000	10	8	19	9	13	13	Carbamidomethylation; Oxidation (M); Deamidation (NQ)	38434	Heterogeneous nuclear ribonucleoprotein D0 OS=Homo sapiens OX=9606 GN=HNRNPD PE=1 SV=1
706	942	tr|A0A0A0MRW6|A0A0A0MRW6_HUMAN	160.38	14	0	0	11	10			5800000	2660000	12	12	0	0	11	11	Carbamidomethylation; Oxidation (M); Deamidation (NQ)	112157	Nucleolar protein 6 OS=Homo sapiens OX=9606 GN=NOL6 PE=1 SV=1
706	944	sp|Q9H6R4|NOL6_HUMAN	160.38	12	0	0	10	9			5800000	2660000	12	12	0	0	11	11	Carbamidomethylation; Oxidation (M); Deamidation (NQ)	127593	Nucleolar protein 6 OS=Homo sapiens OX=9606 GN=NOL6 PE=1 SV=2
587	1035	sp|Q9UPN3|MACF1_HUMAN	160.38	3	0	0	3	1	355000	572000	3570000	1890000	24	22	5	5	20	10	Carbamidomethylation; Deamidation (NQ)	838323	Microtubule-actin cross-linking factor 1 isoforms 1/2/3/5 OS=Homo sapiens OX=9606 GN=MACF1 PE=1 SV=4
587	1039	tr|H3BPE1|H3BPE1_HUMAN	160.38	3	0	1	2	1	424000	20700000	3570000	1890000	25	23	6	6	20	10	Carbamidomethylation; Deamidation (NQ)	856894	Microtubule-actin cross-linking factor 1 isoforms 1/2/3/5 OS=Homo sapiens OX=9606 GN=MACF1 PE=1 SV=1
587	1041	tr|H3BQK9|H3BQK9_HUMAN	160.38	3	0	1	2	1	424000	20700000	3570000	1890000	25	23	6	6	20	10	Carbamidomethylation; Deamidation (NQ)	861093	Microtubule-actin cross-linking factor 1 isoforms 1/2/3/5 OS=Homo sapiens OX=9606 GN=MACF1 PE=1 SV=1
440	648	sp|Q7KZF4|SND1_HUMAN	159.82	25	0	0	22	14			8780000	4290000	20	20	0	0	23	14	Acetylation (Protein N-term); Oxidation (M)	101997	Staphylococcal nuclease domain-containing protein 1 OS=Homo sapiens OX=9606 GN=SND1 PE=1 SV=1
701	753	sp|Q8WYL5|SSH1_HUMAN	159.77	18	0	1	17	6		0	25700000	1980000	16	16	0	1	18	5	Acetylation (Protein N-term)	115511	Protein phosphatase Slingshot homolog 1 OS=Homo sapiens OX=9606 GN=SSH1 PE=1 SV=2
233	2983	sp|P07477|TRY1_HUMAN	159.74	15	12	9	15	15	40800000	3900000	34900000	29000000	11	3	19	18	20	20	Oxidation (M); Deamidation (NQ)	26558	Trypsin-1 OS=Homo sapiens OX=9606 GN=PRSS1 PE=1 SV=1
233	2985	tr|E7EQ64|E7EQ64_HUMAN	159.74	15	11	9	15	15	40800000	3900000	34900000	29000000	11	3	19	18	20	20	Oxidation (M); Deamidation (NQ)	28123	Trypsin-1 OS=Homo sapiens OX=9606 GN=PRSS1 PE=1 SV=1
589	812	sp|Q14669|TRIPC_HUMAN	159.65	9	0	0	7	7	70600		2160000	1350000	16	16	1	0	12	13	Oxidation (M)	220432	E3 ubiquitin-protein ligase TRIP12 OS=Homo sapiens OX=9606 GN=TRIP12 PE=1 SV=1
519	785	tr|E9PLK3|E9PLK3_HUMAN	159.63	16	0	0	16	12			4060000	1730000	14	13	0	0	15	12		102988	Aminopeptidase OS=Homo sapiens OX=9606 GN=NPEPPS PE=1 SV=1
519	786	sp|P55786|PSA_HUMAN	159.63	16	0	0	16	12			4060000	1730000	14	13	0	0	15	12		103276	Puromycin-sensitive aminopeptidase OS=Homo sapiens OX=9606 GN=NPEPPS PE=1 SV=2
722	869	sp|O43290|SNUT1_HUMAN	159.59	16	0	0	13	10			2750000	1150000	10	10	0	0	11	7	Carbamidomethylation; Oxidation (M)	90255	U4/U6.U5 tri-snRNP-associated protein 1 OS=Homo sapiens OX=9606 GN=SART1 PE=1 SV=1
578	801	tr|G3V529|G3V529_HUMAN	159.39	17	0	0	14	14			7040000	3100000	13	13	0	0	13	10	Carbamidomethylation	91481	ATP-dependent RNA helicase DDX24 OS=Homo sapiens OX=9606 GN=DDX24 PE=1 SV=1
578	803	sp|Q9GZR7|DDX24_HUMAN	159.39	17	0	0	14	13			7040000	3100000	13	13	0	0	13	10	Carbamidomethylation	96332	ATP-dependent RNA helicase DDX24 OS=Homo sapiens OX=9606 GN=DDX24 PE=1 SV=1
619	1217	sp|Q6KB66|K2C80_HUMAN	159	24	19	10	8	9	1140000	248000	484000	442000	12	9	8	5	4	5		50525	Keratin type II cytoskeletal 80 OS=Homo sapiens OX=9606 GN=KRT80 PE=1 SV=2
544	705	sp|Q9BW27|NUP85_HUMAN	158.92	24	0	0	10	23			1890000	12800000	15	15	0	0	6	21	Carbamidomethylation; Acetylation (Protein N-term); Oxidation (M)	75019	Nuclear pore complex protein Nup85 OS=Homo sapiens OX=9606 GN=NUP85 PE=1 SV=1
492	866	sp|Q14152|EIF3A_HUMAN	158.47	15	0	0	12	8			7080000	2760000	21	21	0	0	22	11	Carbamidomethylation; Oxidation (M)	166569	Eukaryotic translation initiation factor 3 subunit A OS=Homo sapiens OX=9606 GN=EIF3A PE=1 SV=1
477	649	tr|I3VM54|I3VM54_HUMAN	158.34	13	0	0	13	9			7930000	3860000	14	14	0	0	19	10	Carbamidomethylation	130660	Lysine-specific demethylase 2A OS=Homo sapiens OX=9606 GN=KDM2A PE=1 SV=1
477	650	sp|Q9Y2K7|KDM2A_HUMAN	158.34	13	0	0	13	9			7930000	3860000	14	14	0	0	19	10	Carbamidomethylation	132793	Lysine-specific demethylase 2A OS=Homo sapiens OX=9606 GN=KDM2A PE=1 SV=3
689	840	tr|E7ERK9|E7ERK9_HUMAN	158.3	26	2	0	21	16	1910000		8810000	6270000	12	12	1	0	10	8		59715	Translation initiation factor eIF-2B subunit delta OS=Homo sapiens OX=9606 GN=EIF2B4 PE=1 SV=1
689	841	tr|A0A087WTA5|A0A087WTA5_HUMAN	158.3	27	2	0	22	17	1910000		8810000	6270000	12	12	1	0	10	8		57496	Translation initiation factor eIF-2B subunit delta OS=Homo sapiens OX=9606 GN=EIF2B4 PE=1 SV=1
689	842	sp|Q9UI10|EI2BD_HUMAN	158.3	27	2	0	22	17	1910000		8810000	6270000	12	12	1	0	10	8		57557	Translation initiation factor eIF-2B subunit delta OS=Homo sapiens OX=9606 GN=EIF2B4 PE=1 SV=2
362	755	sp|Q16531|DDB1_HUMAN	158.12	18	0	0	14	18			12200000	21900000	21	21	0	0	20	24	Carbamidomethylation; Oxidation (M); Deamidation (NQ)	126968	DNA damage-binding protein 1 OS=Homo sapiens OX=9606 GN=DDB1 PE=1 SV=1
737	1281	sp|Q9NRG9|AAAS_HUMAN	157.96	16	0	0	16	14			5910000	4210000	9	9	0	0	10	7	Carbamidomethylation; Acetylation (Protein N-term)	59574	Aladin OS=Homo sapiens OX=9606 GN=AAAS PE=1 SV=1
640	863	sp|Q9UIA9|XPO7_HUMAN	157.06	10	0	0	10	7			7070000	2130000	12	12	0	0	13	9	Carbamidomethylation	123907	Exportin-7 OS=Homo sapiens OX=9606 GN=XPO7 PE=1 SV=3
640	864	tr|E7ESC6|E7ESC6_HUMAN	157.06	10	0	0	10	7			7070000	2130000	12	12	0	0	13	9	Carbamidomethylation	124066	Exportin-7 OS=Homo sapiens OX=9606 GN=XPO7 PE=1 SV=1
638	900	sp|O95793|STAU1_HUMAN	157.02	22	0	1	21	17			7040000	1970000	12	6	0	3	15	12	Deamidation (NQ)	63182	Double-stranded RNA-binding protein Staufen homolog 1 OS=Homo sapiens OX=9606 GN=STAU1 PE=1 SV=2
680	950	sp|Q8N1G4|LRC47_HUMAN	156.9	22	0	3	9	19		0	1370000	9490000	10	10	0	1	4	13	Carbamidomethylation	63473	Leucine-rich repeat-containing protein 47 OS=Homo sapiens OX=9606 GN=LRRC47 PE=1 SV=1
329	723	tr|A0A2R8Y7S2|A0A2R8Y7S2_HUMAN	156.89	12	0	0	8	10	569000	269000	1220000	884000	19	7	1	1	28	22	Carbamidomethylation; Oxidation (M); Deamidation (NQ)	184850	Transcription activator BRG1 OS=Homo sapiens OX=9606 GN=SMARCA4 PE=1 SV=1
329	724	tr|A0A2R8Y4P4|A0A2R8Y4P4_HUMAN	156.89	12	0	0	8	10	569000	269000	1220000	884000	19	7	1	1	28	22	Carbamidomethylation; Oxidation (M); Deamidation (NQ)	185192	Transcription activator BRG1 OS=Homo sapiens OX=9606 GN=SMARCA4 PE=1 SV=1
329	725	sp|P51532|SMCA4_HUMAN	156.89	12	0	0	8	10	569000	269000	1220000	884000	19	7	1	1	28	22	Carbamidomethylation; Oxidation (M); Deamidation (NQ)	184644	Transcription activator BRG1 OS=Homo sapiens OX=9606 GN=SMARCA4 PE=1 SV=2
329	727	tr|Q9HBD4|Q9HBD4_HUMAN	156.89	12	0	0	8	10	569000	269000	1220000	884000	19	7	1	1	28	22	Carbamidomethylation; Oxidation (M); Deamidation (NQ)	188147	SMARCA4 isoform 2 OS=Homo sapiens OX=9606 GN=SMARCA4 PE=1 SV=1
329	728	tr|A0A0A0MT49|A0A0A0MT49_HUMAN	156.89	12	0	0	8	10	569000	269000	1220000	884000	19	7	1	1	28	22	Carbamidomethylation; Oxidation (M); Deamidation (NQ)	188859	Transcription activator BRG1 OS=Homo sapiens OX=9606 GN=SMARCA4 PE=1 SV=1
627	913	sp|Q9NVV4|PAPD1_HUMAN	156.83	22	0	0	22	17			10300000	6160000	12	12	0	0	12	10	Carbamidomethylation; Deamidation (NQ)	66172	Poly(A) RNA polymerase mitochondrial OS=Homo sapiens OX=9606 GN=MTPAP PE=1 SV=1
597	952	sp|P55060|XPO2_HUMAN	156.8	13	0	0	13	7			7880000	2140000	11	11	0	0	15	9	Carbamidomethylation; Oxidation (M); Deamidation (NQ)	110417	Exportin-2 OS=Homo sapiens OX=9606 GN=CSE1L PE=1 SV=3
631	793	sp|O76031|CLPX_HUMAN	156	21	0	0	19	18			7900000	6660000	12	12	0	0	12	10		69224	ATP-dependent Clp protease ATP-binding subunit clpX-like mitochondrial OS=Homo sapiens OX=9606 GN=CLPX PE=1 SV=2
729	1029	sp|Q96GM8|TOE1_HUMAN	155.52	26	0	0	22	21			8330000	4200000	10	10	0	0	11	7	Carbamidomethylation; Deamidation (NQ)	56548	Target of EGR1 protein 1 OS=Homo sapiens OX=9606 GN=TOE1 PE=1 SV=1
493	903	sp|P31749|AKT1_HUMAN	155.37	36	0	0	34	18			17800000	8880000	17	15	0	0	25	11	Carbamidomethylation; Oxidation (M); Deamidation (NQ)	55686	RAC-alpha serine/threonine-protein kinase OS=Homo sapiens OX=9606 GN=AKT1 PE=1 SV=2
730	1087	sp|P23469|PTPRE_HUMAN	155.04	16	0	0	8	16			2940000	8490000	11	10	0	0	6	13	Oxidation (M)	80642	Receptor-type tyrosine-protein phosphatase epsilon OS=Homo sapiens OX=9606 GN=PTPRE PE=1 SV=1
920	1818	sp|Q9Y5A9|YTHD2_HUMAN	154.85	11	0	0	11	7			3320000	1890000	5	4	0	0	6	3	Acetylation (Protein N-term)	62334	YTH domain-containing family protein 2 OS=Homo sapiens OX=9606 GN=YTHDF2 PE=1 SV=2
703	953	sp|O60508|PRP17_HUMAN	154.84	25	0	0	9	25			1500000	11100000	10	10	0	0	4	15	Carbamidomethylation	65521	Pre-mRNA-processing factor 17 OS=Homo sapiens OX=9606 GN=CDC40 PE=1 SV=1
283	735	sp|Q9P0M6|H2AW_HUMAN	154.8	40	22	31	24	31	1710000	2240000	4380000	4860000	12	9	15	16	12	16		40058	Core histone macro-H2A.2 OS=Homo sapiens OX=9606 GN=H2AFY2 PE=1 SV=3
513	985	sp|Q14697|GANAB_HUMAN	154.77	13	0	0	11	10			5080000	2390000	12	12	0	0	17	11	Oxidation (M)	106874	Neutral alpha-glucosidase AB OS=Homo sapiens OX=9606 GN=GANAB PE=1 SV=3
524	749	sp|O00203|AP3B1_HUMAN	154.7	13	0	0	12	11			6200000	3050000	14	14	0	0	16	12		121320	AP-3 complex subunit beta-1 OS=Homo sapiens OX=9606 GN=AP3B1 PE=1 SV=3
536	1303	sp|P36957|ODO2_HUMAN	154.39	21	17	18	4	2	2290000	2340000	269000	92700	11	11	12	11	3	1	Oxidation (M)	48755	Dihydrolipoyllysine-residue succinyltransferase component of 2-oxoglutarate dehydrogenase complex mitochondrial OS=Homo sapiens OX=9606 GN=DLST PE=1 SV=4
628	992	sp|O00186|STXB3_HUMAN	154.24	21	0	0	15	21			6550000	11700000	12	12	0	0	10	12	Carbamidomethylation	67764	Syntaxin-binding protein 3 OS=Homo sapiens OX=9606 GN=STXBP3 PE=1 SV=2
210	1533	sp|P08729|K2C7_HUMAN	153.38	15	10	15	11	10		337000			19	1	25	30	20	17	Deamidation (NQ)	51386	Keratin type II cytoskeletal 7 OS=Homo sapiens OX=9606 GN=KRT7 PE=1 SV=5
604	1006	tr|E5RG31|E5RG31_HUMAN	153.34	22	0	0	17	17			8370000	5800000	12	12	0	0	13	12	Carbamidomethylation	65728	DNA replication licensing factor MCM4 (Fragment) OS=Homo sapiens OX=9606 GN=MCM4 PE=1 SV=9
604	1010	tr|A0A3B3IU45|A0A3B3IU45_HUMAN	153.34	16	0	0	12	12			8370000	5800000	12	12	0	0	13	12	Carbamidomethylation	91191	DNA helicase OS=Homo sapiens OX=9606 GN=MCM4 PE=1 SV=1
604	1011	sp|P33991|MCM4_HUMAN	153.34	15	0	0	11	12			8370000	5800000	12	12	0	0	13	12	Carbamidomethylation	96558	DNA replication licensing factor MCM4 OS=Homo sapiens OX=9606 GN=MCM4 PE=1 SV=5
626	870	sp|Q13043|STK4_HUMAN	153.3	25	0	0	23	21			7200000	4640000	11	6	0	0	15	9	Oxidation (M)	55630	Serine/threonine-protein kinase 4 OS=Homo sapiens OX=9606 GN=STK4 PE=1 SV=2
686	1401	sp|Q8IWX8|CHERP_HUMAN	153.27	11	0	0	10	11			7920000	11300000	10	10	0	0	11	15	Carbamidomethylation; Oxidation (M); Deamidation (NQ)	103702	Calcium homeostasis endoplasmic reticulum protein OS=Homo sapiens OX=9606 GN=CHERP PE=1 SV=3
686	1403	tr|J3QK89|J3QK89_HUMAN	153.27	11	0	0	10	11			7920000	11300000	10	10	0	0	11	15	Carbamidomethylation; Oxidation (M); Deamidation (NQ)	104934	Calcium homeostasis endoplasmic reticulum protein OS=Homo sapiens OX=9606 GN=CHERP PE=1 SV=1
478	790	sp|Q12965|MYO1E_HUMAN	153.08	13	0	0	13	8			13400000	746000	14	8	0	0	17	15		127062	Unconventional myosin-Ie OS=Homo sapiens OX=9606 GN=MYO1E PE=1 SV=2
797	1178	sp|O76094|SRP72_HUMAN	153.06	15	0	0	10	14			3060000	3340000	8	8	0	0	5	8	Carbamidomethylation; Acetylation (Protein N-term); Deamidation (NQ)	74606	Signal recognition particle subunit SRP72 OS=Homo sapiens OX=9606 GN=SRP72 PE=1 SV=3
257	1897	tr|J3QS39|J3QS39_HUMAN	152.78	58	58	51	58	51	21200000	11000000	99300000	91900000	10	10	19	12	18	21	Acetylation (Protein N-term)	10469	Polyubiquitin-B (Fragment) OS=Homo sapiens OX=9606 GN=UBB PE=1 SV=1
257	1899	tr|F5H6Q2|F5H6Q2_HUMAN	152.78	44	44	39	44	39	21200000	11000000	99300000	91900000	10	10	19	12	18	21	Acetylation (Protein N-term)	13732	Polyubiquitin-C (Fragment) OS=Homo sapiens OX=9606 GN=UBC PE=1 SV=8
257	1902	tr|F5GYU3|F5GYU3_HUMAN	152.78	40	40	35	40	35	21200000	11000000	99300000	91900000	10	10	19	12	18	21	Acetylation (Protein N-term)	15032	Polyubiquitin-C (Fragment) OS=Homo sapiens OX=9606 GN=UBC PE=1 SV=1
257	1903	tr|F5H2Z3|F5H2Z3_HUMAN	152.78	40	40	35	40	35	21200000	11000000	99300000	91900000	10	10	19	12	18	21	Acetylation (Protein N-term)	15310	Polyubiquitin-C (Fragment) OS=Homo sapiens OX=9606 GN=UBC PE=1 SV=1
257	1904	tr|F5H265|F5H265_HUMAN	152.78	36	36	32	36	32	21200000	11000000	99300000	91900000	10	10	19	12	18	21	Acetylation (Protein N-term)	16841	Polyubiquitin-C (Fragment) OS=Homo sapiens OX=9606 GN=UBC PE=1 SV=1
257	1905	tr|B4DV12|B4DV12_HUMAN	152.78	35	35	31	35	31	21200000	11000000	99300000	91900000	10	10	19	12	18	21	Acetylation (Protein N-term)	17215	Polyubiquitin-B OS=Homo sapiens OX=9606 GN=UBB PE=1 SV=1
257	1906	tr|F5H747|F5H747_HUMAN	152.78	34	34	29	34	29	21200000	11000000	99300000	91900000	10	10	19	12	18	21	Acetylation (Protein N-term)	18073	Polyubiquitin-C (Fragment) OS=Homo sapiens OX=9606 GN=UBC PE=1 SV=8
257	1907	tr|F5GXK7|F5GXK7_HUMAN	152.78	32	32	28	32	28	21200000	11000000	99300000	91900000	10	10	19	12	18	21	Acetylation (Protein N-term)	19016	Polyubiquitin-C (Fragment) OS=Homo sapiens OX=9606 GN=UBC PE=1 SV=2
257	1909	tr|J3QKN0|J3QKN0_HUMAN	152.78	26	26	23	26	23	21200000	11000000	99300000	91900000	10	10	19	12	18	21	Acetylation (Protein N-term)	23163	Polyubiquitin-B (Fragment) OS=Homo sapiens OX=9606 GN=UBB PE=1 SV=1
257	1912	sp|P0CG47|UBB_HUMAN	152.78	24	24	21	24	21	21200000	11000000	99300000	91900000	10	10	19	12	18	21	Acetylation (Protein N-term)	25762	Polyubiquitin-B OS=Homo sapiens OX=9606 GN=UBB PE=1 SV=1
257	1913	tr|Q5PY61|Q5PY61_HUMAN	152.78	24	24	21	24	21	21200000	11000000	99300000	91900000	10	10	19	12	18	21	Acetylation (Protein N-term)	25758	Polyubiquitin-C OS=Homo sapiens OX=9606 GN=UBC PE=1 SV=1
257	1925	sp|P0CG48|UBC_HUMAN	152.78	8	8	7	8	7	21200000	11000000	99300000	91900000	10	10	19	12	18	21	Acetylation (Protein N-term)	77039	Polyubiquitin-C OS=Homo sapiens OX=9606 GN=UBC PE=1 SV=3
752	1292	sp|Q13131|AAPK1_HUMAN	152.72	13	0	0	13	13			8840000	9080000	7	7	0	0	7	7		64009	5'-AMP-activated protein kinase catalytic subunit alpha-1 OS=Homo sapiens OX=9606 GN=PRKAA1 PE=1 SV=4
554	706	sp|Q9UQ35|SRRM2_HUMAN	152.44	8	0	0	6	7			13300000	13200000	18	18	0	0	14	18	Oxidation (M)	299616	Serine/arginine repetitive matrix protein 2 OS=Homo sapiens OX=9606 GN=SRRM2 PE=1 SV=2
654	1299	sp|Q15637|SF01_HUMAN	152.42	14	0	0	14	12			9410000	16400000	8	8	0	0	10	11	Carbamidomethylation; Acetylation (Protein N-term); Oxidation (M)	68330	Splicing factor 1 OS=Homo sapiens OX=9606 GN=SF1 PE=1 SV=4
1066	2092	sp|Q9NYB0|TE2IP_HUMAN	152.21	20	0	0	20	13			2740000	3900000	5	5	0	0	5	3		44260	Telomeric repeat-binding factor 2-interacting protein 1 OS=Homo sapiens OX=9606 GN=TERF2IP PE=1 SV=1
697	1088	tr|A0A2R8Y595|A0A2R8Y595_HUMAN	152.2	17	0	0	17	10			7890000	2800000	10	10	0	0	10	9	Carbamidomethylation	73000	Transcriptional repressor CTCF OS=Homo sapiens OX=9606 GN=CTCF PE=1 SV=1
697	1089	tr|A0A2R8YFL0|A0A2R8YFL0_HUMAN	152.2	15	0	0	15	9			7890000	2800000	10	10	0	0	10	9	Carbamidomethylation	82613	Transcriptional repressor CTCF OS=Homo sapiens OX=9606 GN=CTCF PE=1 SV=1
697	1090	sp|P49711|CTCF_HUMAN	152.2	15	0	0	15	9			7890000	2800000	10	10	0	0	10	9	Carbamidomethylation	82785	Transcriptional repressor CTCF OS=Homo sapiens OX=9606 GN=CTCF PE=1 SV=1
297	1894	sp|P01764|HV323_HUMAN	152.01	49	49	46	0	0	1880000	4390000			9	2	31	26	0	0	Carbamidomethylation; Oxidation (M); Deamidation (NQ)	12582	Immunoglobulin heavy variable 3-23 OS=Homo sapiens OX=9606 GN=IGHV3-23 PE=1 SV=2
406	2124	sp|A0A0B4J1V6|HV373_HUMAN	151.92	42	42	40	0	0	52000000	48100000			9	4	18	19	0	0	Carbamidomethylation; Acetylation (Protein N-term); Deamidation (NQ)	12858	Immunoglobulin heavy variable 3-73 OS=Homo sapiens OX=9606 GN=IGHV3-73 PE=3 SV=1
240	1252	sp|Q9NSB2|KRT84_HUMAN	151.86	18	8	8	14	8	216000	175000	2380000	46900	18	5	21	23	19	15	Deamidation (NQ)	64842	Keratin type II cuticular Hb4 OS=Homo sapiens OX=9606 GN=KRT84 PE=2 SV=2
374	972	sp|Q5T749|KPRP_HUMAN	151.8	22	22	16	8	10	9210000	4920000	3690000	1860000	12	12	15	14	10	8	Carbamidomethylation	64136	Keratinocyte proline-rich protein OS=Homo sapiens OX=9606 GN=KPRP PE=1 SV=1
845	1487	sp|Q8WVM8|SCFD1_HUMAN	151.77	17	0	0	7	15			821000	4370000	8	8	0	0	5	7	Carbamidomethylation; Acetylation (Protein N-term); Oxidation (M)	72380	Sec1 family domain-containing protein 1 OS=Homo sapiens OX=9606 GN=SCFD1 PE=1 SV=4
744	1372	sp|P17858|PFKAL_HUMAN	151.6	17	5	0	12	9	208000		4060000	3120000	11	9	3	0	8	7	Carbamidomethylation	85018	ATP-dependent 6-phosphofructokinase liver type OS=Homo sapiens OX=9606 GN=PFKL PE=1 SV=6
465	1402	sp|Q96SI9|STRBP_HUMAN	151.5	13	0	1	10	12		177000	3830000	1540000	10	4	0	1	14	20	Carbamidomethylation; Oxidation (M); Deamidation (NQ)	73653	Spermatid perinuclear RNA-binding protein OS=Homo sapiens OX=9606 GN=STRBP PE=1 SV=1
541	1104	sp|Q9P2I0|CPSF2_HUMAN	151.4	13	1	0	12	12	23100		7710000	4830000	10	10	1	0	14	12	Carbamidomethylation; Oxidation (M)	88487	Cleavage and polyadenylation specificity factor subunit 2 OS=Homo sapiens OX=9606 GN=CPSF2 PE=1 SV=2
518	1390	sp|Q6STE5|SMRD3_HUMAN	151.04	18	0	0	18	14			121000		10	1	0	0	15	12	Carbamidomethylation; Oxidation (M); Deamidation (NQ)	55016	SWI/SNF-related matrix-associated actin-dependent regulator of chromatin subfamily D member 3 OS=Homo sapiens OX=9606 GN=SMARCD3 PE=1 SV=1
771	1368	sp|P62191|PRS4_HUMAN	151.03	19	0	0	15	19			13200000	8260000	9	9	0	0	8	9		49185	26S proteasome regulatory subunit 4 OS=Homo sapiens OX=9606 GN=PSMC1 PE=1 SV=1
682	1037	sp|Q9NXF1|TEX10_HUMAN	150.83	12	0	0	12	8			5210000	1260000	10	10	0	0	14	9		105674	Testis-expressed protein 10 OS=Homo sapiens OX=9606 GN=TEX10 PE=1 SV=2
855	1314	sp|Q7L775|EPMIP_HUMAN	150.8	19	3	1	15	6	4800	0	6270000	2190000	10	10	1	1	8	3	Carbamidomethylation; Deamidation (NQ)	70370	EPM2A-interacting protein 1 OS=Homo sapiens OX=9606 GN=EPM2AIP1 PE=1 SV=1
881	1446	sp|Q96D46|NMD3_HUMAN	150.73	21	0	0	21	13			10800000	4610000	10	10	0	0	10	5	Carbamidomethylation	57603	60S ribosomal export protein NMD3 OS=Homo sapiens OX=9606 GN=NMD3 PE=1 SV=1
881	1447	tr|C9JA08|C9JA08_HUMAN	150.73	20	0	0	20	12			10800000	4610000	10	10	0	0	10	5	Carbamidomethylation	60126	60S ribosomal export protein NMD3 OS=Homo sapiens OX=9606 GN=NMD3 PE=1 SV=1
621	1003	sp|P33993|MCM7_HUMAN	150.69	16	0	0	12	15			2500000	4420000	10	10	0	0	12	12		81308	DNA replication licensing factor MCM7 OS=Homo sapiens OX=9606 GN=MCM7 PE=1 SV=4
294	1962	sp|A0A0B4J1X5|HV374_HUMAN	150.31	44	44	42	0	0					10	0	32	29	0	0	Carbamidomethylation; Oxidation (M); Deamidation (NQ)	12840	Immunoglobulin heavy variable 3-74 OS=Homo sapiens OX=9606 GN=IGHV3-74 PE=3 SV=1
801	1174	sp|Q7Z3B4|NUP54_HUMAN	150.3	23	3	2	18	9	1900000	23400	4360000	1390000	10	10	1	1	9	4	Deamidation (NQ)	55436	Nucleoporin p54 OS=Homo sapiens OX=9606 GN=NUP54 PE=1 SV=2
384	1309	sp|Q08554|DSC1_HUMAN	149.91	13	11	10	8	8	6010000	4530000	4190000	4860000	10	10	13	11	7	9	Carbamidomethylation; Oxidation (M)	99987	Desmocollin-1 OS=Homo sapiens OX=9606 GN=DSC1 PE=1 SV=2
688	1122	sp|Q9ULK4|MED23_HUMAN	149.8	8	0	0	7	5			2070000	700000	10	10	0	0	11	6	Oxidation (M)	156473	Mediator of RNA polymerase II transcription subunit 23 OS=Homo sapiens OX=9606 GN=MED23 PE=1 SV=2
688	1123	tr|Q5JWT2|Q5JWT2_HUMAN	149.8	8	0	0	7	5			2070000	700000	10	10	0	0	11	6	Oxidation (M)	157113	Mediator of RNA polymerase II transcription subunit 23 OS=Homo sapiens OX=9606 GN=MED23 PE=1 SV=1
809	1417	sp|Q9Y5Q8|TF3C5_HUMAN	149.03	16	0	0	14	16			6380000	3440000	8	8	0	0	6	7		59571	General transcription factor 3C polypeptide 5 OS=Homo sapiens OX=9606 GN=GTF3C5 PE=1 SV=2
575	730	sp|P42704|LPPRC_HUMAN	148.93	11	1	0	8	11	33600		3480000	2180000	16	15	1	0	12	17	Carbamidomethylation	157904	Leucine-rich PPR motif-containing protein mitochondrial OS=Homo sapiens OX=9606 GN=LRPPRC PE=1 SV=3
438	892	sp|P16885|PLCG2_HUMAN	148.73	12	0	0	11	9			5960000	3860000	17	16	0	0	18	17	Carbamidomethylation; Oxidation (M)	147870	1-phosphatidylinositol 4 5-bisphosphate phosphodiesterase gamma-2 OS=Homo sapiens OX=9606 GN=PLCG2 PE=1 SV=4
438	896	tr|A0A0A0MRF9|A0A0A0MRF9_HUMAN	148.73	11	0	0	10	10			5880000	3860000	16	15	0	0	17	17	Carbamidomethylation; Oxidation (M)	146059	1-phosphatidylinositol 4 5-bisphosphate phosphodiesterase gamma OS=Homo sapiens OX=9606 GN=PLCG2 PE=1 SV=1
427	782	sp|P50570|DYN2_HUMAN	148.65	19	0	0	19	11			8950000	3570000	17	17	0	0	24	15	Oxidation (M)	98064	Dynamin-2 OS=Homo sapiens OX=9606 GN=DNM2 PE=1 SV=2
380	1500	sp|P01780|HV307_HUMAN	147.58	58	50	56	0	0	6180000	6370000			11	2	23	23	0	0	Carbamidomethylation; Oxidation (M); Deamidation (NQ)	12943	Immunoglobulin heavy variable 3-7 OS=Homo sapiens OX=9606 GN=IGHV3-7 PE=1 SV=2
553	844	sp|Q9BXP5|SRRT_HUMAN	147.43	18	1	1	17	10	1330000	795000	5100000	2380000	15	15	2	2	15	12	Carbamidomethylation; Deamidation (NQ)	100667	Serrate RNA effector molecule homolog OS=Homo sapiens OX=9606 GN=SRRT PE=1 SV=1
750	922	tr|F8W7U8|F8W7U8_HUMAN	146.94	16	0	0	16	9			4590000	2330000	9	9	0	0	9	5	Acetylation (Protein N-term)	80522	Double-strand break repair protein OS=Homo sapiens OX=9606 GN=MRE11 PE=1 SV=1
750	923	sp|P49959|MRE11_HUMAN	146.94	16	0	0	16	9			4590000	2330000	9	9	0	0	9	5	Acetylation (Protein N-term)	80593	Double-strand break repair protein MRE11 OS=Homo sapiens OX=9606 GN=MRE11 PE=1 SV=3
685	881	sp|P33176|KINH_HUMAN	146.75	13	1	0	10	9	5740000		3830000	1180000	12	12	1	0	10	8	Deamidation (NQ)	109685	Kinesin-1 heavy chain OS=Homo sapiens OX=9606 GN=KIF5B PE=1 SV=1
650	938	tr|A0A286YF22|A0A286YF22_HUMAN	146.13	21	7	0	21	15	749000		11200000	9290000	9	9	3	0	10	7	Carbamidomethylation	55939	D-3-phosphoglycerate dehydrogenase OS=Homo sapiens OX=9606 GN=PHGDH PE=1 SV=1
650	939	tr|A0A2C9F2M7|A0A2C9F2M7_HUMAN	146.13	21	7	0	21	15	749000		11200000	9290000	9	9	3	0	10	7	Carbamidomethylation	56112	D-3-phosphoglycerate dehydrogenase OS=Homo sapiens OX=9606 GN=PHGDH PE=1 SV=1
650	940	sp|O43175|SERA_HUMAN	146.13	21	7	0	21	15	749000		11200000	9290000	9	9	3	0	10	7	Carbamidomethylation	56651	D-3-phosphoglycerate dehydrogenase OS=Homo sapiens OX=9606 GN=PHGDH PE=1 SV=4
775	1143	sp|Q9H223|EHD4_HUMAN	146.06	17	0	0	7	17			141000	7970000	9	8	0	0	4	9		61175	EH domain-containing protein 4 OS=Homo sapiens OX=9606 GN=EHD4 PE=1 SV=1
289	1960	sp|P07305|H10_HUMAN	145.53	28	27	27	27	28	16400000	18000000	46000000	42600000	6	6	17	17	10	14	Acetylation (Protein N-term); Oxidation (M); Deamidation (NQ)	20863	Histone H1.0 OS=Homo sapiens OX=9606 GN=H1F0 PE=1 SV=3
592	832	sp|Q13423|NNTM_HUMAN	145.49	13	0	0	13	6			4970000	1620000	13	13	0	0	16	12	Carbamidomethylation	113895	NAD(P) transhydrogenase mitochondrial OS=Homo sapiens OX=9606 GN=NNT PE=1 SV=3
126	1979	sp|Q7Z3Y7|K1C28_HUMAN	145.48	14	11	14	12	12	126000000	736000	3000000	2720000	11	1	42	43	36	28	Oxidation (M); Deamidation (NQ)	50567	Keratin type I cytoskeletal 28 OS=Homo sapiens OX=9606 GN=KRT28 PE=1 SV=2
785	1326	sp|O94925|GLSK_HUMAN	145.44	14	0	1	12	10		13200	4790000	2850000	8	8	0	1	6	6		73461	Glutaminase kidney isoform mitochondrial OS=Homo sapiens OX=9606 GN=GLS PE=1 SV=1
315	1145	tr|B2R5W2|B2R5W2_HUMAN	144.82	37	27	31	24	28	1860000	1490000	8780000	48500000	10	10	9	10	14	19	Oxidation (M); Deamidation (NQ)	31948	Heterogeneous nuclear ribonucleoproteins C1/C2 OS=Homo sapiens OX=9606 GN=HNRNPC PE=1 SV=1
315	1146	sp|P07910|HNRPC_HUMAN	144.82	35	25	29	23	26	1860000	1490000	8780000	48500000	10	10	9	10	14	19	Oxidation (M); Deamidation (NQ)	33670	Heterogeneous nuclear ribonucleoproteins C1/C2 OS=Homo sapiens OX=9606 GN=HNRNPC PE=1 SV=4
315	1155	tr|G3V4W0|G3V4W0_HUMAN	144.82	41	30	34	26	31	1860000	1490000	8780000	48500000	10	10	9	10	14	19	Oxidation (M); Deamidation (NQ)	28916	Heterogeneous nuclear ribonucleoproteins C1/C2 (Fragment) OS=Homo sapiens OX=9606 GN=HNRNPC PE=1 SV=1
315	1156	tr|B4DY08|B4DY08_HUMAN	144.82	38	27	31	24	28	1860000	1490000	8780000	48500000	10	10	9	10	14	19	Oxidation (M); Deamidation (NQ)	31972	Heterogeneous nuclear ribonucleoproteins C1/C2 OS=Homo sapiens OX=9606 GN=HNRNPC PE=1 SV=1
315	1196	tr|G3V4C1|G3V4C1_HUMAN	144.82	35	27	24	24	27	1860000	1490000	8780000	48500000	9	9	9	9	14	19	Oxidation (M)	32238	Heterogeneous nuclear ribonucleoproteins C1/C2 OS=Homo sapiens OX=9606 GN=HNRNPC PE=1 SV=1
315	1197	tr|G3V2Q1|G3V2Q1_HUMAN	144.82	33	26	23	23	26	1860000	1490000	8780000	48500000	9	9	9	9	14	19	Oxidation (M)	33571	Heterogeneous nuclear ribonucleoproteins C1/C2 OS=Homo sapiens OX=9606 GN=HNRNPC PE=1 SV=1
530	909	sp|P30101|PDIA3_HUMAN	144.66	25	6	19	17	9	299000	950000	3130000	992000	11	11	3	10	11	5	Oxidation (M)	56782	Protein disulfide-isomerase A3 OS=Homo sapiens OX=9606 GN=PDIA3 PE=1 SV=4
424	1343	sp|Q6P2Q9|PRP8_HUMAN	144.62	7	0	0	7	5			6360000	2460000	20	20	0	0	20	15	Carbamidomethylation	273599	Pre-mRNA-processing-splicing factor 8 OS=Homo sapiens OX=9606 GN=PRPF8 PE=1 SV=2
324	2190	sp|P69905|HBA_HUMAN	144.41	35	35	35	35	35	0	396000	2680000	5640000	6	1	14	15	11	14	Oxidation (M)	15258	Hemoglobin subunit alpha OS=Homo sapiens OX=9606 GN=HBA1 PE=1 SV=2
324	2330	tr|A0A2R8Y7C0|A0A2R8Y7C0_HUMAN	144.41	37	37	37	37	37	0	396000	2680000	5640000	6	1	14	15	11	14	Oxidation (M)	13962	Hemoglobin subunit alpha (Fragment) OS=Homo sapiens OX=9606 GN=HBA2 PE=1 SV=1
517	1046	sp|P05141|ADT2_HUMAN	144.37	36	34	6	18	22	1320000		698000	293000	11	4	11	2	8	10	Carbamidomethylation; Acetylation (Protein N-term)	32852	ADP/ATP translocase 2 OS=Homo sapiens OX=9606 GN=SLC25A5 PE=1 SV=7
723	1004	sp|P53992|SC24C_HUMAN	144.23	13	0	0	5	13			1960000	3780000	11	11	0	0	5	12		118325	Protein transport protein Sec24C OS=Homo sapiens OX=9606 GN=SEC24C PE=1 SV=3
468	961	sp|P06241|FYN_HUMAN	144.15	24	3	0	20	19			4820000	2570000	16	7	2	0	20	15	Carbamidomethylation; Deamidation (NQ)	60762	Tyrosine-protein kinase Fyn OS=Homo sapiens OX=9606 GN=FYN PE=1 SV=3
836	1005	sp|Q9H267|VP33B_HUMAN	143.71	19	0	0	0	19				7100000	12	12	0	0	0	13		70585	Vacuolar protein sorting-associated protein 33B OS=Homo sapiens OX=9606 GN=VPS33B PE=1 SV=2
848	1538	sp|Q02252|MMSA_HUMAN	143.64	14	2	0	14	11	13200		4610000	2690000	7	7	1	0	7	5		57840	Methylmalonate-semialdehyde dehydrogenase [acylating] mitochondrial OS=Homo sapiens OX=9606 GN=ALDH6A1 PE=1 SV=2
573	969	tr|H0YNH8|H0YNH8_HUMAN	143.62	18	1	1	15	0	13700	65700	6080000	204000	25	25	1	1	25	1	Carbamidomethylation; Deamidation (NQ)	161308	Uveal autoantigen with coiled-coil domains and ankyrin repeats OS=Homo sapiens OX=9606 GN=UACA PE=1 SV=1
573	970	sp|Q9BZF9|UACA_HUMAN	143.62	18	1	1	15	0	13700	65700	6080000	204000	25	25	1	1	25	1	Carbamidomethylation; Deamidation (NQ)	162504	Uveal autoantigen with coiled-coil domains and ankyrin repeats OS=Homo sapiens OX=9606 GN=UACA PE=1 SV=2
639	1161	sp|Q9Y228|T3JAM_HUMAN	143.52	23	0	0	16	22			8200000	13700000	12	12	0	0	9	15	Carbamidomethylation; Oxidation (M); Deamidation (NQ)	63626	TRAF3-interacting JNK-activating modulator OS=Homo sapiens OX=9606 GN=TRAF3IP3 PE=1 SV=2
487	1769	tr|B7Z6Z4|B7Z6Z4_HUMAN	143.39	30	26	19	30	19	1960000	825000	19700000	11000000	6	6	7	6	9	7	Carbamidomethylation; Oxidation (M); Deamidation (NQ)	26707	cDNA FLJ56329 highly similar to Myosin light polypeptide 6 OS=Homo sapiens OX=9606 GN=MYL6 PE=1 SV=1
487	1778	tr|F8W1R7|F8W1R7_HUMAN	143.39	50	42	31	50	31	1960000	825000	19700000	11000000	6	6	7	6	9	7	Carbamidomethylation; Oxidation (M); Deamidation (NQ)	16290	Myosin light polypeptide 6 OS=Homo sapiens OX=9606 GN=MYL6 PE=1 SV=1
487	1779	sp|P60660|MYL6_HUMAN	143.39	48	40	30	48	30	1960000	825000	19700000	11000000	6	6	7	6	9	7	Carbamidomethylation; Oxidation (M); Deamidation (NQ)	16930	Myosin light polypeptide 6 OS=Homo sapiens OX=9606 GN=MYL6 PE=1 SV=2
487	1780	tr|J3KND3|J3KND3_HUMAN	143.39	47	40	30	47	30	1960000	825000	19700000	11000000	6	6	7	6	9	7	Carbamidomethylation; Oxidation (M); Deamidation (NQ)	17058	Myosin light polypeptide 6 OS=Homo sapiens OX=9606 GN=MYL6 PE=1 SV=1
487	1781	tr|G8JLA2|G8JLA2_HUMAN	143.39	47	40	30	47	30	1960000	825000	19700000	11000000	6	6	7	6	9	7	Carbamidomethylation; Oxidation (M); Deamidation (NQ)	17089	Myosin light polypeptide 6 OS=Homo sapiens OX=9606 GN=MYL6 PE=1 SV=1
487	1782	tr|G3V1V0|G3V1V0_HUMAN	143.39	45	38	28	45	28	1960000	825000	19700000	11000000	6	6	7	6	9	7	Carbamidomethylation; Oxidation (M); Deamidation (NQ)	18037	Myosin light polypeptide 6 OS=Homo sapiens OX=9606 GN=MYL6 PE=1 SV=1
548	1208	sp|P60842|IF4A1_HUMAN	143.36	30	25	4	8	13	2990000		755000	5830000	13	9	12	1	4	8	Carbamidomethylation	46154	Eukaryotic initiation factor 4A-I OS=Homo sapiens OX=9606 GN=EIF4A1 PE=1 SV=1
747	1381	tr|A6NJA2|A6NJA2_HUMAN	143.34	23	0	0	22	21			8300000	8310000	9	9	0	0	10	9	Oxidation (M)	51087	Ubiquitin carboxyl-terminal hydrolase 14 OS=Homo sapiens OX=9606 GN=USP14 PE=1 SV=2
747	1387	sp|P54578|UBP14_HUMAN	143.34	21	0	0	20	19			8300000	8310000	9	9	0	0	10	9	Oxidation (M)	56069	Ubiquitin carboxyl-terminal hydrolase 14 OS=Homo sapiens OX=9606 GN=USP14 PE=1 SV=3
207	1405	tr|Q5TEC6|Q5TEC6_HUMAN	143.19	51	26	29	46	46	16400000	21800000	83200000	107000000	17	2	19	20	29	30	Carbamidomethylation; Oxidation (M); Deamidation (NQ)	15430	Histone H3 OS=Homo sapiens OX=9606 GN=HIST2H3PS2 PE=1 SV=1
788	1720	tr|B1AVT0|B1AVT0_HUMAN	142.91	16	0	0	16	11			12000000	7610000	6	6	0	0	7	6		59875	Dual-specificity protein kinase CLK2 OS=Homo sapiens OX=9606 GN=CLK2 PE=1 SV=1
788	1730	sp|P49760|CLK2_HUMAN	142.91	16	0	0	16	11			12000000	7610000	6	6	0	0	7	6		60090	Dual specificity protein kinase CLK2 OS=Homo sapiens OX=9606 GN=CLK2 PE=1 SV=1
473	2083	sp|P31942|HNRH3_HUMAN	142.71	20	17	16	9	9	3840000	4740000	3670000	8180000	6	6	10	10	5	6	Oxidation (M)	36926	Heterogeneous nuclear ribonucleoprotein H3 OS=Homo sapiens OX=9606 GN=HNRNPH3 PE=1 SV=2
624	989	sp|P53396|ACLY_HUMAN	142.7	15	1	0	12	9	38600		4310000	4710000	14	14	1	0	14	13	Carbamidomethylation; Oxidation (M)	120839	ATP-citrate synthase OS=Homo sapiens OX=9606 GN=ACLY PE=1 SV=3
463	894	tr|A0A087WWP4|A0A087WWP4_HUMAN	142.39	18	1	0	18	11	16600		8300000	1620000	17	16	1	0	23	11		102135	RNA-binding protein 15 OS=Homo sapiens OX=9606 GN=RBM15 PE=1 SV=1
463	897	sp|Q96T37|RBM15_HUMAN	142.39	17	1	0	17	11	16600		8300000	1620000	17	16	1	0	23	11		107188	RNA-binding protein 15 OS=Homo sapiens OX=9606 GN=RBM15 PE=1 SV=2
699	1180	sp|Q9H2P0|ADNP_HUMAN	142.38	15	0	1	12	7		16800	4080000	901000	12	12	0	1	11	6	Carbamidomethylation; Oxidation (M); Deamidation (NQ)	123563	Activity-dependent neuroprotector homeobox protein OS=Homo sapiens OX=9606 GN=ADNP PE=1 SV=1
663	1152	sp|Q9NUL7|DDX28_HUMAN	142.35	19	0	0	17	15			14000000	2220000	9	9	0	0	11	8		59581	Probable ATP-dependent RNA helicase DDX28 OS=Homo sapiens OX=9606 GN=DDX28 PE=1 SV=2
611	1296	sp|P49756|RBM25_HUMAN	142.33	14	0	0	13	12			3790000	6760000	11	11	0	0	10	12		100186	RNA-binding protein 25 OS=Homo sapiens OX=9606 GN=RBM25 PE=1 SV=3
658	871	sp|Q9P219|DAPLE_HUMAN	142.29	11	0	0	11	1			6150000	131000	21	21	0	0	21	3	Oxidation (M)	228228	Protein Daple OS=Homo sapiens OX=9606 GN=CCDC88C PE=1 SV=3
718	1170	sp|O75151|PHF2_HUMAN	142.29	8	0	0	6	6			2560000	4540000	9	7	0	0	6	12		120775	Lysine-specific demethylase PHF2 OS=Homo sapiens OX=9606 GN=PHF2 PE=1 SV=4
694	1256	sp|O15269|SPTC1_HUMAN	141.78	25	0	0	25	10			41400000	22900000	11	11	0	0	14	5	Carbamidomethylation; Oxidation (M)	52744	Serine palmitoyltransferase 1 OS=Homo sapiens OX=9606 GN=SPTLC1 PE=1 SV=1
594	895	sp|Q8WWM7|ATX2L_HUMAN	141.62	17	0	0	9	14			2600000	36400000	14	13	0	0	11	14	Deamidation (NQ)	113374	Ataxin-2-like protein OS=Homo sapiens OX=9606 GN=ATXN2L PE=1 SV=2
594	901	tr|H3BUF6|H3BUF6_HUMAN	141.62	15	0	0	9	12			2600000	35700000	13	12	0	0	11	13	Deamidation (NQ)	112714	Ataxin-2-like protein OS=Homo sapiens OX=9606 GN=ATXN2L PE=1 SV=1
896	1315	tr|A0A1W2PPU9|A0A1W2PPU9_HUMAN	141.44	42	0	0	42	6			4160000	129000	9	3	0	0	9	3		32379	Myosin phosphatase Rho-interacting protein (Fragment) OS=Homo sapiens OX=9606 GN=MPRIP PE=1 SV=1
978	2004	sp|P22083|FUT4_HUMAN	141.09	14	0	0	12	11			1700000	2890000	5	5	0	0	6	4	Deamidation (NQ)	59084	Alpha-(1 3)-fucosyltransferase 4 OS=Homo sapiens OX=9606 GN=FUT4 PE=2 SV=3
502	1071	tr|H0Y3C5|H0Y3C5_HUMAN	140.74	18	3	0	18	15			2590000	2780000	11	6	2	0	16	15	Oxidation (M); Deamidation (NQ)	59511	Tyrosine-protein kinase OS=Homo sapiens OX=9606 GN=HCK PE=1 SV=1
502	1072	sp|P08631|HCK_HUMAN	140.74	18	3	0	18	15			2590000	2780000	11	6	2	0	16	15	Oxidation (M); Deamidation (NQ)	59600	Tyrosine-protein kinase HCK OS=Homo sapiens OX=9606 GN=HCK PE=1 SV=5
502	1073	tr|F6SF04|F6SF04_HUMAN	140.74	18	3	0	18	15			2590000	2780000	11	6	2	0	16	15	Oxidation (M); Deamidation (NQ)	59600	Tyrosine-protein kinase OS=Homo sapiens OX=9606 GN=HCK PE=1 SV=1
502	1074	tr|J3KPD6|J3KPD6_HUMAN	140.74	18	3	0	18	15			2590000	2780000	11	6	2	0	16	15	Oxidation (M); Deamidation (NQ)	59582	Tyrosine-protein kinase OS=Homo sapiens OX=9606 GN=HCK PE=1 SV=1
598	1356	sp|Q9HCK5|AGO4_HUMAN	140.56	10	0	0	8	10					7	0	0	0	10	11	Carbamidomethylation; Oxidation (M)	97097	Protein argonaute-4 OS=Homo sapiens OX=9606 GN=AGO4 PE=1 SV=2
781	1583	tr|A0A2R8Y855|A0A2R8Y855_HUMAN	140.33	22	0	4	19	22		0	6020000	3950000	6	6	0	1	5	7		41874	SWI/SNF-related matrix-associated actin-dependent regulator of chromatin subfamily E member 1 OS=Homo sapiens OX=9606 GN=SMARCE1 PE=1 SV=1
781	1584	tr|B4DGM3|B4DGM3_HUMAN	140.33	20	0	3	18	20		0	6020000	3950000	6	6	0	1	5	7		44770	SWI/SNF-related matrix-associated actin-dependent regulator of chromatin subfamily E member 1 OS=Homo sapiens OX=9606 GN=SMARCE1 PE=1 SV=1
781	1585	sp|Q969G3|SMCE1_HUMAN	140.33	19	0	3	17	19		0	6020000	3950000	6	6	0	1	5	7		46649	SWI/SNF-related matrix-associated actin-dependent regulator of chromatin subfamily E member 1 OS=Homo sapiens OX=9606 GN=SMARCE1 PE=1 SV=2
781	1600	tr|J3QKS7|J3QKS7_HUMAN	140.33	28	0	5	24	28		0	6020000	3950000	6	6	0	1	5	7		33305	SWI/SNF-related matrix-associated actin-dependent regulator of chromatin subfamily E member 1 (Fragment) OS=Homo sapiens OX=9606 GN=SMARCE1 PE=1 SV=2
635	1060	sp|O75152|ZC11A_HUMAN	140.24	17	0	0	16	12			5470000	1580000	12	12	0	0	13	11		89131	Zinc finger CCCH domain-containing protein 11A OS=Homo sapiens OX=9606 GN=ZC3H11A PE=1 SV=3
642	924	sp|Q07912|ACK1_HUMAN	140.18	12	0	0	10	7			5220000	2440000	11	11	0	0	14	7	Carbamidomethylation; Oxidation (M)	114569	Activated CDC42 kinase 1 OS=Homo sapiens OX=9606 GN=TNK2 PE=1 SV=3
642	925	tr|C9J1X3|C9J1X3_HUMAN	140.18	12	0	0	10	7			5220000	2440000	11	11	0	0	14	7	Carbamidomethylation; Oxidation (M)	114950	Activated CDC42 kinase 1 OS=Homo sapiens OX=9606 GN=TNK2 PE=1 SV=1
798	1634	tr|B4DXZ6|B4DXZ6_HUMAN	140.11	19	0	1	16	12		91000	8230000	5090000	11	10	0	1	11	8	Carbamidomethylation; Oxidation (M); Deamidation (NQ)	68327	cDNA FLJ58644 highly similar to Fragile X mental retardation syndrome-related protein 1 OS=Homo sapiens OX=9606 GN=FXR1 PE=1 SV=1
568	1052	sp|Q9NVP1|DDX18_HUMAN	140.01	16	0	0	15	10			10800000	8340000	11	11	0	0	16	10	Carbamidomethylation; Deamidation (NQ)	75407	ATP-dependent RNA helicase DDX18 OS=Homo sapiens OX=9606 GN=DDX18 PE=1 SV=2
786	1345	sp|O00505|IMA4_HUMAN	139.97	18	0	0	17	10			3470000	915000	9	5	0	0	9	5	Acetylation (Protein N-term)	57811	Importin subunit alpha-4 OS=Homo sapiens OX=9606 GN=KPNA3 PE=1 SV=2
579	955	tr|H0Y8E6|H0Y8E6_HUMAN	139.78	15	0	0	15	7			3790000	2190000	10	10	0	0	16	10	Carbamidomethylation; Oxidation (M)	94118	DNA helicase (Fragment) OS=Homo sapiens OX=9606 GN=MCM2 PE=1 SV=1
579	957	sp|P49736|MCM2_HUMAN	139.78	14	0	0	14	6			3790000	2190000	10	10	0	0	16	10	Carbamidomethylation; Oxidation (M)	101896	DNA replication licensing factor MCM2 OS=Homo sapiens OX=9606 GN=MCM2 PE=1 SV=4
740	1594	sp|Q15154|PCM1_HUMAN	139.29	5	0	0	3	4			955000	1350000	10	9	0	0	7	8	Carbamidomethylation	228542	Pericentriolar material 1 protein OS=Homo sapiens OX=9606 GN=PCM1 PE=1 SV=5
499	946	sp|P33992|MCM5_HUMAN	139.07	19	0	0	18	13			7020000	3860000	12	11	0	0	20	15	Carbamidomethylation; Oxidation (M)	82286	DNA replication licensing factor MCM5 OS=Homo sapiens OX=9606 GN=MCM5 PE=1 SV=5
590	1167	sp|O14802|RPC1_HUMAN	138.94	13	0	0	13	5			9310000	1980000	19	18	0	0	20	7	Carbamidomethylation; Oxidation (M)	155641	DNA-directed RNA polymerase III subunit RPC1 OS=Homo sapiens OX=9606 GN=POLR3A PE=1 SV=2
1067	2487	sp|Q96SK2|TM209_HUMAN	138.08	15	0	4	11	7		0	4620000	2740000	5	5	0	1	5	3	Carbamidomethylation; Deamidation (NQ)	62922	Transmembrane protein 209 OS=Homo sapiens OX=9606 GN=TMEM209 PE=1 SV=2
349	2472	sp|P41219|PERI_HUMAN	138.04	8	6	6	8	8					9	0	9	13	14	11	Oxidation (M); Deamidation (NQ)	53651	Peripherin OS=Homo sapiens OX=9606 GN=PRPH PE=1 SV=2
828	1355	tr|H0YH87|H0YH87_HUMAN	137.96	13	1	0	10	4	24400		1370000	419000	8	7	1	0	9	3	Deamidation (NQ)	90167	Ataxin-2 OS=Homo sapiens OX=9606 GN=ATXN2 PE=1 SV=2
828	1357	tr|A0A2R8Y7P6|A0A2R8Y7P6_HUMAN	137.96	11	1	0	8	3	24400		1370000	419000	8	7	1	0	9	3	Deamidation (NQ)	103709	Ataxin-2 OS=Homo sapiens OX=9606 GN=ATXN2 PE=1 SV=1
828	1358	tr|A0A2R8YDM9|A0A2R8YDM9_HUMAN	137.96	11	1	0	8	3	24400		1370000	419000	8	7	1	0	9	3	Deamidation (NQ)	105130	Ataxin-2 OS=Homo sapiens OX=9606 GN=ATXN2 PE=1 SV=1
828	1360	tr|F8WB06|F8WB06_HUMAN	137.96	10	1	0	7	3	24400		1370000	419000	8	7	1	0	9	3	Deamidation (NQ)	117361	Ataxin-2 (Fragment) OS=Homo sapiens OX=9606 GN=ATXN2 PE=1 SV=2
828	1361	tr|F8VQP2|F8VQP2_HUMAN	137.96	10	1	0	7	3	24400		1370000	419000	8	7	1	0	9	3	Deamidation (NQ)	116514	Ataxin-2 OS=Homo sapiens OX=9606 GN=ATXN2 PE=1 SV=1
828	1362	tr|V9GY86|V9GY86_HUMAN	137.96	10	1	0	7	3	24400		1370000	419000	8	7	1	0	9	3	Deamidation (NQ)	124403	Ataxin-2 OS=Homo sapiens OX=9606 GN=ATXN2 PE=1 SV=1
828	1363	tr|A0A2R8Y5A6|A0A2R8Y5A6_HUMAN	137.96	9	1	0	7	3	24400		1370000	419000	8	7	1	0	9	3	Deamidation (NQ)	126009	Ataxin-2 OS=Homo sapiens OX=9606 GN=ATXN2 PE=1 SV=1
828	1365	sp|Q99700|ATX2_HUMAN	137.96	8	1	0	6	2	24400		1370000	419000	8	7	1	0	9	3	Deamidation (NQ)	140283	Ataxin-2 OS=Homo sapiens OX=9606 GN=ATXN2 PE=1 SV=2
669	1330	tr|A0A1W2PNP0|A0A1W2PNP0_HUMAN	137.78	19	0	0	11	15			4890000	11600000	11	11	0	0	9	11	Carbamidomethylation	65982	GPI transamidase component PIG-T (Fragment) OS=Homo sapiens OX=9606 GN=PIGT PE=1 SV=1
669	1331	sp|Q969N2|PIGT_HUMAN	137.78	19	0	0	11	15			4890000	11600000	11	11	0	0	9	11	Carbamidomethylation	65700	GPI transamidase component PIG-T OS=Homo sapiens OX=9606 GN=PIGT PE=1 SV=1
538	1128	sp|Q14289|FAK2_HUMAN	137.39	18	1	2	12	13	33200	54200	3470000	2990000	16	16	1	2	17	13	Carbamidomethylation; Oxidation (M); Deamidation (NQ)	115875	Protein-tyrosine kinase 2-beta OS=Homo sapiens OX=9606 GN=PTK2B PE=1 SV=2
539	984	sp|P09769|FGR_HUMAN	137.13	29	3	0	25	21			8320000	5750000	18	14	2	0	20	16	Oxidation (M); Deamidation (NQ)	59479	Tyrosine-protein kinase Fgr OS=Homo sapiens OX=9606 GN=FGR PE=1 SV=2
649	1423	sp|P38919|IF4A3_HUMAN	137.11	26	21	13	9	11	666000	277000	411000	259000	10	7	8	4	3	6	Acetylation (Protein N-term)	46871	Eukaryotic initiation factor 4A-III OS=Homo sapiens OX=9606 GN=EIF4A3 PE=1 SV=4
407	1715	tr|A0A2R8Y7R2|A0A2R8Y7R2_HUMAN	136.94	61	61	61	28	21	659000	451000	1000000	655000	7	4	14	11	5	10	Oxidation (M); Deamidation (NQ)	12176	Hemoglobin subunit beta OS=Homo sapiens OX=9606 GN=HBB PE=1 SV=1
407	1718	sp|P68871|HBB_HUMAN	136.94	46	46	46	21	16	659000	451000	1000000	655000	7	4	14	11	5	10	Oxidation (M); Deamidation (NQ)	15998	Hemoglobin subunit beta OS=Homo sapiens OX=9606 GN=HBB PE=1 SV=2
726	1043	sp|Q9HCS7|SYF1_HUMAN	136.81	13	0	0	9	11			3610000	1980000	10	10	0	0	7	10		100010	Pre-mRNA-splicing factor SYF1 OS=Homo sapiens OX=9606 GN=XAB2 PE=1 SV=2
565	1268	sp|P46977|STT3A_HUMAN	136.72	12	1	0	11	11	74300		18100000	12600000	10	9	2	0	12	14		80530	Dolichyl-diphosphooligosaccharide--protein glycosyltransferase subunit STT3A OS=Homo sapiens OX=9606 GN=STT3A PE=1 SV=2
516	1469	sp|P36578|RL4_HUMAN	136.39	23	10	10	16	12	888000	448000	3210000	2520000	9	9	3	5	13	8	Oxidation (M); Deamidation (NQ)	47697	60S ribosomal protein L4 OS=Homo sapiens OX=9606 GN=RPL4 PE=1 SV=5
402	906	sp|Q8TDD1|DDX54_HUMAN	136.17	16	0	0	14	13			6150000	8730000	14	13	0	0	16	22	Carbamidomethylation	98595	ATP-dependent RNA helicase DDX54 OS=Homo sapiens OX=9606 GN=DDX54 PE=1 SV=2
451	1732	sp|P81605|DCD_HUMAN	136.13	66	34	34	45	55	3530000	4580000	7830000	7850000	7	7	8	7	7	9	Carbamidomethylation	11284	Dermcidin OS=Homo sapiens OX=9606 GN=DCD PE=1 SV=2
1070	2752	sp|P67809|YBOX1_HUMAN	135.21	13	2	6	7	2		143000			4	1	1	1	4	1	Deamidation (NQ)	35924	Nuclease-sensitive element-binding protein 1 OS=Homo sapiens OX=9606 GN=YBX1 PE=1 SV=3
652	1173	sp|Q12769|NU160_HUMAN	135.16	8	1	0	7	4	180000		6870000	2590000	13	13	2	0	12	7	Carbamidomethylation; Oxidation (M); Deamidation (NQ)	162121	Nuclear pore complex protein Nup160 OS=Homo sapiens OX=9606 GN=NUP160 PE=1 SV=3
1031	2234	tr|B4DDD6|B4DDD6_HUMAN	135.14	15	2	0	12	4	11400		3150000	241000	5	5	1	0	6	1	Deamidation (NQ)	45746	cDNA FLJ59450 highly similar to Drebrin-like protein OS=Homo sapiens OX=9606 GN=DBNL PE=1 SV=1
1031	2235	sp|Q9UJU6|DBNL_HUMAN	135.14	14	2	0	12	4	11400		3150000	241000	5	5	1	0	6	1	Deamidation (NQ)	48207	Drebrin-like protein OS=Homo sapiens OX=9606 GN=DBNL PE=1 SV=1
724	1110	sp|Q86YP4|P66A_HUMAN	134.92	22	0	0	15	15			3920000	6460000	11	10	0	0	7	10	Oxidation (M)	68063	Transcriptional repressor p66-alpha OS=Homo sapiens OX=9606 GN=GATAD2A PE=1 SV=1
721	1238	sp|P31948|STIP1_HUMAN	134.08	19	0	7	17	13		138000	8560000	9550000	10	10	0	4	8	7	Oxidation (M)	62639	Stress-induced-phosphoprotein 1 OS=Homo sapiens OX=9606 GN=STIP1 PE=1 SV=1
1057	2238	tr|A0A0U1RRM1|A0A0U1RRM1_HUMAN	134.05	13	0	2	6	11		903000	751000	4320000	5	4	0	1	2	4		63462	Transcriptional repressor p66-beta OS=Homo sapiens OX=9606 GN=GATAD2B PE=1 SV=1
1057	2239	sp|Q8WXI9|P66B_HUMAN	134.05	13	0	2	6	11		903000	751000	4320000	5	4	0	1	2	4		65261	Transcriptional repressor p66-beta OS=Homo sapiens OX=9606 GN=GATAD2B PE=1 SV=1
769	1214	sp|Q15459|SF3A1_HUMAN	133.95	15	0	1	11	11		275000	3990000	1710000	12	12	0	1	10	8	Carbamidomethylation	88886	Splicing factor 3A subunit 1 OS=Homo sapiens OX=9606 GN=SF3A1 PE=1 SV=1
1163	2803	sp|P33241|LSP1_HUMAN	133.95	16	0	0	16	11			5650000	2630000	3	3	0	0	3	3		37192	Lymphocyte-specific protein 1 OS=Homo sapiens OX=9606 GN=LSP1 PE=1 SV=1
1163	2816	tr|E7EMG9|E7EMG9_HUMAN	133.95	20	0	0	20	13			5650000	2630000	3	3	0	0	3	3		30613	Lymphocyte-specific protein 1 (Fragment) OS=Homo sapiens OX=9606 GN=LSP1 PE=1 SV=1
838	1310	tr|E9PEX6|E9PEX6_HUMAN	133.89	21	0	11	15	11		1940000	3100000	1150000	9	9	0	5	6	4	Carbamidomethylation; Oxidation (M)	51816	Dihydrolipoyl dehydrogenase OS=Homo sapiens OX=9606 GN=DLD PE=1 SV=1
838	1312	sp|P09622|DLDH_HUMAN	133.89	20	0	10	15	11		1940000	3100000	1150000	9	9	0	5	6	4	Carbamidomethylation; Oxidation (M)	54177	Dihydrolipoyl dehydrogenase mitochondrial OS=Homo sapiens OX=9606 GN=DLD PE=1 SV=2
634	919	sp|Q13464|ROCK1_HUMAN	133.63	11	0	0	11	5			3650000	665000	13	13	0	0	14	9		158174	Rho-associated protein kinase 1 OS=Homo sapiens OX=9606 GN=ROCK1 PE=1 SV=1
734	1548	sp|P00390|GSHR_HUMAN	133.56	19	14	16	2	2	4350000	9260000	253000	242000	8	8	6	7	2	2	Carbamidomethylation	56257	Glutathione reductase mitochondrial OS=Homo sapiens OX=9606 GN=GSR PE=1 SV=2
613	1130	sp|Q5JSL3|DOC11_HUMAN	133.34	5	0	0	4	3			1820000	977000	11	11	0	0	12	11		237669	Dedicator of cytokinesis protein 11 OS=Homo sapiens OX=9606 GN=DOCK11 PE=1 SV=2
613	1131	tr|A6NIW2|A6NIW2_HUMAN	133.34	5	0	0	4	3			1820000	977000	11	11	0	0	12	11		238096	Dedicator of cytokinesis protein 11 OS=Homo sapiens OX=9606 GN=DOCK11 PE=1 SV=2
766	1393	sp|Q15269|PWP2_HUMAN	133.26	9	0	0	9	4			4030000	1620000	9	9	0	0	9	5	Carbamidomethylation	102452	Periodic tryptophan protein 2 homolog OS=Homo sapiens OX=9606 GN=PWP2 PE=2 SV=2
766	1394	tr|A0A0B4J2E5|A0A0B4J2E5_HUMAN	133.26	9	0	0	9	4			4030000	1620000	9	9	0	0	9	5	Carbamidomethylation	102451	Uncharacterized protein OS=Homo sapiens OX=9606 GN=LOC102724159 PE=1 SV=1
606	1094	sp|Q8NI27|THOC2_HUMAN	132.99	11	0	0	10	5			4500000	887000	16	16	0	0	15	7	Acetylation (Protein N-term); Deamidation (NQ)	182774	THO complex subunit 2 OS=Homo sapiens OX=9606 GN=THOC2 PE=1 SV=2
898	1793	sp|Q13422|IKZF1_HUMAN	132.61	14	0	0	12	11			3950000	4060000	6	5	0	0	5	6		57528	DNA-binding protein Ikaros OS=Homo sapiens OX=9606 GN=IKZF1 PE=1 SV=1
577	1078	tr|F5H8D7|F5H8D7_HUMAN	132.44	17	0	0	13	17			3850000	6020000	9	9	0	0	11	12	Carbamidomethylation	66014	DNA repair protein XRCC1 OS=Homo sapiens OX=9606 GN=XRCC1 PE=1 SV=2
577	1080	sp|P18887|XRCC1_HUMAN	132.44	17	0	0	13	17			3850000	6020000	9	9	0	0	11	12	Carbamidomethylation	69477	DNA repair protein XRCC1 OS=Homo sapiens OX=9606 GN=XRCC1 PE=1 SV=2
615	1233	sp|Q9H583|HEAT1_HUMAN	132.41	7	0	0	6	4			2590000	1280000	16	16	0	0	16	10	Acetylation (Protein N-term); Deamidation (NQ)	242368	HEAT repeat-containing protein 1 OS=Homo sapiens OX=9606 GN=HEATR1 PE=1 SV=3
580	1033	tr|E7EQB2|E7EQB2_HUMAN	132.15	16	1	9	9	13		142000	935000	922000	10	5	1	7	7	10	Carbamidomethylation	76626	Lactotransferrin (Fragment) OS=Homo sapiens OX=9606 GN=LTF PE=1 SV=1
580	1036	tr|E7ER44|E7ER44_HUMAN	132.15	16	1	9	9	13		142000	935000	922000	10	5	1	7	7	10	Carbamidomethylation	77970	Lactotransferrin OS=Homo sapiens OX=9606 GN=LTF PE=1 SV=1
580	1038	sp|P02788|TRFL_HUMAN	132.15	15	1	9	9	13		142000	935000	922000	10	5	1	7	7	10	Carbamidomethylation	78182	Lactotransferrin OS=Homo sapiens OX=9606 GN=LTF PE=1 SV=6
645	1076	sp|Q14974|IMB1_HUMAN	132.15	13	0	0	9	9			4320000	2190000	10	10	0	0	11	10	Acetylation (Protein N-term); Oxidation (M)	97170	Importin subunit beta-1 OS=Homo sapiens OX=9606 GN=KPNB1 PE=1 SV=2
861	1617	sp|O75530|EED_HUMAN	132.13	15	0	0	15	12			3990000	2950000	6	6	0	0	6	6		50198	Polycomb protein EED OS=Homo sapiens OX=9606 GN=EED PE=1 SV=2
381	2427	tr|A0A075B7E8|A0A075B7E8_HUMAN	132.11	35	33	32	0	0		0			8	1	25	23	0	0	Oxidation (M); Deamidation (NQ)	12904	Immunoglobulin heavy variable 3/OR16-13 (non-functional) (Fragment) OS=Homo sapiens OX=9606 GN=IGHV3OR16-13 PE=1 SV=1
713	1273	tr|A0A0A0MTB8|A0A0A0MTB8_HUMAN	131.99	11	0	0	11	7			4880000	1550000	9	9	0	0	9	7		99366	WD repeat-containing protein 36 OS=Homo sapiens OX=9606 GN=WDR36 PE=1 SV=1
713	1274	sp|Q8NI36|WDR36_HUMAN	131.99	11	0	0	11	7			4880000	1550000	9	9	0	0	9	7		105322	WD repeat-containing protein 36 OS=Homo sapiens OX=9606 GN=WDR36 PE=1 SV=1
693	1133	tr|H7BXY3|H7BXY3_HUMAN	131.95	9	0	0	8	6			1730000	902000	11	10	0	0	10	8	Carbamidomethylation	130550	ATP-dependent RNA helicase DHX30 OS=Homo sapiens OX=9606 GN=DHX30 PE=1 SV=1
693	1134	sp|Q7L2E3|DHX30_HUMAN	131.95	9	0	0	8	6			1730000	902000	11	10	0	0	10	8	Carbamidomethylation	133938	ATP-dependent RNA helicase DHX30 OS=Homo sapiens OX=9606 GN=DHX30 PE=1 SV=1
651	1172	sp|Q14694|UBP10_HUMAN	131.9	15	0	0	14	13			4050000	2340000	11	11	0	0	14	9	Deamidation (NQ)	87134	Ubiquitin carboxyl-terminal hydrolase 10 OS=Homo sapiens OX=9606 GN=USP10 PE=1 SV=2
895	3316	sp|Q8TF68|ZN384_HUMAN	131.83	10	0	0	10	9			4610000	12200000	5	4	0	0	6	5		63219	Zinc finger protein 384 OS=Homo sapiens OX=9606 GN=ZNF384 PE=1 SV=2
830	1421	tr|E7EQN5|E7EQN5_HUMAN	131.82	13	0	0	13	6			2350000	436000	9	9	0	0	10	4		102571	Rho GTPase-activating protein 4 OS=Homo sapiens OX=9606 GN=ARHGAP4 PE=1 SV=1
830	1422	sp|P98171|RHG04_HUMAN	131.82	13	0	0	13	6			2350000	436000	9	9	0	0	10	4		105026	Rho GTPase-activating protein 4 OS=Homo sapiens OX=9606 GN=ARHGAP4 PE=1 SV=2
709	1048	tr|E7ESY4|E7ESY4_HUMAN	131.79	16	0	0	12	10			845000	1160000	11	6	0	0	8	10		79373	Metastasis-associated protein MTA1 OS=Homo sapiens OX=9606 GN=MTA1 PE=1 SV=1
709	1049	sp|Q13330|MTA1_HUMAN	131.79	15	0	0	12	10			845000	1160000	11	6	0	0	8	10		80786	Metastasis-associated protein MTA1 OS=Homo sapiens OX=9606 GN=MTA1 PE=1 SV=2
460	1031	sp|Q03188|CENPC_HUMAN	131.48	15	1	0	9	14	186000		34800000	41900000	13	13	1	0	17	16	Deamidation (NQ)	106834	Centromere protein C OS=Homo sapiens OX=9606 GN=CENPC PE=1 SV=2
742	1510	sp|Q8ND82|Z280C_HUMAN	131.46	14	0	2	7	11		158000	2680000	5170000	9	8	0	1	7	10	Carbamidomethylation; Deamidation (NQ)	83096	Zinc finger protein 280C OS=Homo sapiens OX=9606 GN=ZNF280C PE=1 SV=1
773	1399	sp|Q01518|CAP1_HUMAN	131.38	21	0	8	13	15		352000	5220000	7480000	9	9	0	5	9	6	Carbamidomethylation; Acetylation (Protein N-term); Oxidation (M)	51902	Adenylyl cyclase-associated protein 1 OS=Homo sapiens OX=9606 GN=CAP1 PE=1 SV=5
799	1445	sp|O75131|CPNE3_HUMAN	131.36	19	2	2	11	16	67000	10500	6210000	5320000	9	9	1	1	5	9	Carbamidomethylation	60131	Copine-3 OS=Homo sapiens OX=9606 GN=CPNE3 PE=1 SV=1
847	1375	sp|Q9H9T3|ELP3_HUMAN	131.24	15	0	0	15	8			2870000	1760000	8	8	0	0	8	4		62259	Elongator complex protein 3 OS=Homo sapiens OX=9606 GN=ELP3 PE=1 SV=2
595	1044	sp|O95831|AIFM1_HUMAN	131.16	24	2	5	16	22	32800	43200	5420000	16200000	14	14	1	4	9	14	Oxidation (M)	66901	Apoptosis-inducing factor 1 mitochondrial OS=Homo sapiens OX=9606 GN=AIFM1 PE=1 SV=1
846	1324	sp|Q69YN2|C19L1_HUMAN	130.86	18	0	0	12	18			3770000	3830000	8	8	0	0	5	8	Oxidation (M)	60619	CWF19-like protein 1 OS=Homo sapiens OX=9606 GN=CWF19L1 PE=1 SV=2
673	1591	sp|P49411|EFTU_HUMAN	130.03	24	20	13	3	3	3360000	2260000	260000	255000	8	8	10	7	1	1	Carbamidomethylation; Deamidation (NQ)	49542	Elongation factor Tu mitochondrial OS=Homo sapiens OX=9606 GN=TUFM PE=1 SV=2
432	1489	sp|P38159|RBMX_HUMAN	130	29	19	18	16	11	1680000	711000	3120000	5390000	12	11	10	14	9	8	Acetylation (Protein N-term)	42332	RNA-binding motif protein X chromosome OS=Homo sapiens OX=9606 GN=RBMX PE=1 SV=3
661	960	tr|K7EJE8|K7EJE8_HUMAN	129.92	16	0	0	12	12			3260000	2910000	14	14	0	0	11	12	Carbamidomethylation	93297	Lon protease homolog mitochondrial OS=Homo sapiens OX=9606 GN=LONP1 PE=1 SV=1
661	964	tr|K7EKE6|K7EKE6_HUMAN	129.92	15	0	0	12	11			3260000	2180000	13	13	0	0	11	11	Carbamidomethylation	95180	Lon protease homolog mitochondrial OS=Homo sapiens OX=9606 GN=LONP1 PE=1 SV=1
661	965	sp|P36776|LONM_HUMAN	129.92	13	0	0	10	9			3260000	2180000	13	13	0	0	11	11	Carbamidomethylation	106489	Lon protease homolog mitochondrial OS=Homo sapiens OX=9606 GN=LONP1 PE=1 SV=2
569	1290	tr|J3QRU1|J3QRU1_HUMAN	129.85	16	3	0	16	12					11	0	2	0	16	10	Carbamidomethylation; Deamidation (NQ)	61387	Tyrosine-protein kinase OS=Homo sapiens OX=9606 GN=YES1 PE=1 SV=1
569	1291	sp|P07947|YES_HUMAN	129.85	16	3	0	16	12					11	0	2	0	16	10	Carbamidomethylation; Deamidation (NQ)	60801	Tyrosine-protein kinase Yes OS=Homo sapiens OX=9606 GN=YES1 PE=1 SV=3
614	1239	sp|Q08J23|NSUN2_HUMAN	129.79	17	1	0	14	9	86900		3310000	2710000	11	11	1	0	14	10	Carbamidomethylation; Oxidation (M)	86471	tRNA (cytosine(34)-C(5))-methyltransferase OS=Homo sapiens OX=9606 GN=NSUN2 PE=1 SV=2
780	1541	tr|F5H5U2|F5H5U2_HUMAN	129.72	16	0	0	4	16			541000	4290000	10	10	0	0	4	12		65191	RNA helicase OS=Homo sapiens OX=9606 GN=DDX55 PE=1 SV=1
780	1574	sp|Q8NHQ9|DDX55_HUMAN	129.72	14	0	0	4	14			541000	4190000	9	9	0	0	4	11		68547	ATP-dependent RNA helicase DDX55 OS=Homo sapiens OX=9606 GN=DDX55 PE=1 SV=3
984	1530	sp|Q9NWQ8|PHAG1_HUMAN	129.69	27	0	0	0	27				7500000	8	8	0	0	0	9	Oxidation (M)	46981	Phosphoprotein associated with glycosphingolipid-enriched microdomains 1 OS=Homo sapiens OX=9606 GN=PAG1 PE=1 SV=2
804	1254	sp|Q03252|LMNB2_HUMAN	129.42	18	2	0	5	18	320000		1440000	7550000	13	11	1	0	5	12		69948	Lamin-B2 OS=Homo sapiens OX=9606 GN=LMNB2 PE=1 SV=4
956	1647	sp|Q06203|PUR1_HUMAN	128.98	18	0	4	16	7		48900	4120000	1020000	8	8	0	3	7	4		57399	Amidophosphoribosyltransferase OS=Homo sapiens OX=9606 GN=PPAT PE=1 SV=1
800	1479	sp|Q9ULW0|TPX2_HUMAN	128.73	13	0	0	12	5			2920000	303000	9	8	0	0	8	5	Carbamidomethylation	85653	Targeting protein for Xklp2 OS=Homo sapiens OX=9606 GN=TPX2 PE=1 SV=2
560	971	sp|P43246|MSH2_HUMAN	128.65	14	0	0	14	12			7270000	3500000	14	14	0	0	17	12		104743	DNA mismatch repair protein Msh2 OS=Homo sapiens OX=9606 GN=MSH2 PE=1 SV=1
549	1911	sp|Q92522|H1X_HUMAN	128.62	32	23	27	10	11	1310000	1260000	1380000	2260000	8	8	10	10	4	5	Deamidation (NQ)	22487	Histone H1x OS=Homo sapiens OX=9606 GN=H1FX PE=1 SV=1
825	1654	sp|Q96KM6|Z512B_HUMAN	128.36	11	0	0	7	8			1390000	734000	7	7	0	0	6	5		97264	Zinc finger protein 512B OS=Homo sapiens OX=9606 GN=ZNF512B PE=1 SV=1
1146	2245	sp|Q9UKL0|RCOR1_HUMAN	128.07	9	0	0	5	7			936000	773000	4	4	0	0	2	3		53327	REST corepressor 1 OS=Homo sapiens OX=9606 GN=RCOR1 PE=1 SV=2
867	1278	sp|Q03164|KMT2A_HUMAN	127.78	4	0	0	2	2			223000	965000	12	12	0	0	5	9		431768	Histone-lysine N-methyltransferase 2A OS=Homo sapiens OX=9606 GN=KMT2A PE=1 SV=5
831	1556	tr|A0A1B0GV09|A0A1B0GV09_HUMAN	127.55	6	0	0	5	5			1980000	1460000	7	6	0	0	5	7	Carbamidomethylation	138254	Histone-lysine N-methyltransferase EHMT1 OS=Homo sapiens OX=9606 GN=EHMT1 PE=1 SV=1
831	1557	sp|Q9H9B1|EHMT1_HUMAN	127.55	6	0	0	5	5			1980000	1460000	7	6	0	0	5	7	Carbamidomethylation	141466	Histone-lysine N-methyltransferase EHMT1 OS=Homo sapiens OX=9606 GN=EHMT1 PE=1 SV=4
618	2039	sp|A0A0B4J1Y9|HV372_HUMAN	127.3	40	40	38	0	0	33700000	36800000			7	1	12	13	0	0	Carbamidomethylation	13203	Immunoglobulin heavy variable 3-72 OS=Homo sapiens OX=9606 GN=IGHV3-72 PE=3 SV=1
687	1316	sp|Q7L014|DDX46_HUMAN	127.03	12	1	1	12	6	2280000	91600	4240000	1010000	12	12	2	1	13	7	Carbamidomethylation; Oxidation (M)	117362	Probable ATP-dependent RNA helicase DDX46 OS=Homo sapiens OX=9606 GN=DDX46 PE=1 SV=2
687	1317	tr|A0A0C4DG89|A0A0C4DG89_HUMAN	127.03	12	1	1	12	6	2280000	91600	4240000	1010000	12	12	2	1	13	7	Carbamidomethylation; Oxidation (M)	117461	Probable ATP-dependent RNA helicase DDX46 OS=Homo sapiens OX=9606 GN=DDX46 PE=1 SV=1
753	1397	sp|Q9H3U1|UN45A_HUMAN	126.63	8	0	0	8	5			1360000	688000	7	7	0	0	9	5	Deamidation (NQ)	103077	Protein unc-45 homolog A OS=Homo sapiens OX=9606 GN=UNC45A PE=1 SV=1
753	1398	tr|A0A1W2PNX8|A0A1W2PNX8_HUMAN	126.63	7	0	0	7	4			1360000	688000	7	7	0	0	9	5	Deamidation (NQ)	118395	Protein unc-45 homolog A OS=Homo sapiens OX=9606 GN=UNC45A PE=1 SV=1
646	1376	sp|P12236|ADT3_HUMAN	126.62	28	17	6	14	19			270000	131000	9	2	7	2	7	9	Carbamidomethylation; Acetylation (Protein N-term)	32866	ADP/ATP translocase 3 OS=Homo sapiens OX=9606 GN=SLC25A6 PE=1 SV=4
346	2197	sp|A0A0C4DH42|HV366_HUMAN	126.6	48	48	48	0	0	848000	1040000			7	2	25	22	0	0	Carbamidomethylation; Oxidation (M); Deamidation (NQ)	12698	Immunoglobulin heavy variable 3-66 OS=Homo sapiens OX=9606 GN=IGHV3-66 PE=3 SV=1
1121	2840	sp|Q13501|SQSTM_HUMAN	126.57	12	0	0	6	12			377000	3550000	4	4	0	0	2	4		47687	Sequestosome-1 OS=Homo sapiens OX=9606 GN=SQSTM1 PE=1 SV=1
808	2248	sp|Q09028|RBBP4_HUMAN	126.43	14	3	2	14	13	70600	47000	10800000	4630000	5	5	1	1	6	5	Acetylation (Protein N-term)	47656	Histone-binding protein RBBP4 OS=Homo sapiens OX=9606 GN=RBBP4 PE=1 SV=3
790	2021	tr|Q5JR95|Q5JR95_HUMAN	126.31	31	31	6	13	13	941000	104000	727000	899000	5	5	6	2	2	4	Carbamidomethylation	21880	40S ribosomal protein S8 OS=Homo sapiens OX=9606 GN=RPS8 PE=1 SV=1
790	2022	sp|P62241|RS8_HUMAN	126.31	28	28	5	12	12	941000	104000	727000	899000	5	5	6	2	2	4	Carbamidomethylation	24205	40S ribosomal protein S8 OS=Homo sapiens OX=9606 GN=RPS8 PE=1 SV=2
637	1121	tr|E9PGC0|E9PGC0_HUMAN	125.91	12	0	0	10	11			3230000	3140000	10	10	0	0	14	10	Carbamidomethylation	101790	Ras GTPase-activating protein 1 OS=Homo sapiens OX=9606 GN=RASA1 PE=1 SV=1
637	1125	sp|P20936|RASA1_HUMAN	125.91	10	0	0	9	9			3230000	3140000	10	10	0	0	14	10	Carbamidomethylation	116403	Ras GTPase-activating protein 1 OS=Homo sapiens OX=9606 GN=RASA1 PE=1 SV=1
945	1491	sp|Q9BUI4|RPC3_HUMAN	125.64	15	0	0	15	3			7780000	1360000	8	8	0	0	8	2	Carbamidomethylation	60612	DNA-directed RNA polymerase III subunit RPC3 OS=Homo sapiens OX=9606 GN=POLR3C PE=1 SV=1
531	2088	tr|A0A0B4J2B5|A0A0B4J2B5_HUMAN	125.62	53	53	50	0	0					8	0	17	16	0	0	Carbamidomethylation; Oxidation (M); Deamidation (NQ)	10657	Immunoglobulin heavy variable 3/OR16-9 (non-functional) (Fragment) OS=Homo sapiens OX=9606 GN=IGHV3OR16-9 PE=1 SV=1
719	1270	sp|Q14244|MAP7_HUMAN	125.45	15	1	1	14	8	0	0	4830000	2300000	13	13	1	1	14	8		84052	Ensconsin OS=Homo sapiens OX=9606 GN=MAP7 PE=1 SV=1
719	1284	tr|A0A087WZ40|A0A087WZ40_HUMAN	125.45	14	1	1	12	8	0	0	4550000	2300000	12	12	1	1	13	8		87818	Ensconsin OS=Homo sapiens OX=9606 GN=MAP7 PE=1 SV=1
711	1210	sp|O60701|UGDH_HUMAN	125.39	20	0	0	18	13			4610000	3640000	8	8	0	0	10	6		55024	UDP-glucose 6-dehydrogenase OS=Homo sapiens OX=9606 GN=UGDH PE=1 SV=1
720	1554	sp|P42285|MTREX_HUMAN	125.36	9	0	0	7	7			2680000	3760000	9	9	0	0	8	10	Carbamidomethylation; Oxidation (M)	117805	Exosome RNA helicase MTR4 OS=Homo sapiens OX=9606 GN=MTREX PE=1 SV=3
923	1746	sp|Q9BZK7|TBL1R_HUMAN	125.09	17	0	0	15	6			6230000	763000	6	6	0	0	6	3	Carbamidomethylation	55595	F-box-like/WD repeat-containing protein TBL1XR1 OS=Homo sapiens OX=9606 GN=TBL1XR1 PE=1 SV=1
581	1082	sp|O00160|MYO1F_HUMAN	125.07	10	0	0	10	6			2310000	1310000	11	6	0	0	12	13	Carbamidomethylation	124844	Unconventional myosin-If OS=Homo sapiens OX=9606 GN=MYO1F PE=1 SV=3
676	1660	sp|P01876|IGHA1_HUMAN	124.35	16	16	16	3	3	1630000	2590000	431000	2070000	6	6	7	10	1	2	Deamidation (NQ)	37655	Immunoglobulin heavy constant alpha 1 OS=Homo sapiens OX=9606 GN=IGHA1 PE=1 SV=2
676	1666	tr|A0A286YEY1|A0A286YEY1_HUMAN	124.35	14	14	14	2	2	1630000	2590000	431000	2070000	6	6	7	10	1	2	Deamidation (NQ)	42849	Immunoglobulin heavy constant alpha 1 (Fragment) OS=Homo sapiens OX=9606 GN=IGHA1 PE=1 SV=1
470	1630	sp|Q96P63|SPB12_HUMAN	124.24	15	10	11	12	12	1260000	1290000	2310000	2020000	6	6	6	8	8	8	Acetylation (Protein N-term)	46276	Serpin B12 OS=Homo sapiens OX=9606 GN=SERPINB12 PE=1 SV=1
894	2460	tr|Q5JY17|Q5JY17_HUMAN	124.18	56	0	8	41	47				5950000	6	1	0	1	6	4	Carbamidomethylation; Acetylation (Protein N-term)	13132	Nuclear receptor coactivator 5 (Fragment) OS=Homo sapiens OX=9606 GN=NCOA5 PE=1 SV=1
552	1304	sp|P62269|RS18_HUMAN	124.16	52	52	44	0	0	3910000	1480000			8	8	15	10	0	0	Acetylation (Protein N-term); Oxidation (M); Deamidation (NQ)	17719	40S ribosomal protein S18 OS=Homo sapiens OX=9606 GN=RPS18 PE=1 SV=3
806	1443	sp|Q9BVI4|NOC4L_HUMAN	124.1	20	2	2	18	8	89500	106000	8360000	3030000	8	8	1	2	7	4		58468	Nucleolar complex protein 4 homolog OS=Homo sapiens OX=9606 GN=NOC4L PE=1 SV=1
982	1867	sp|P18669|PGAM1_HUMAN	124.04	31	31	0	0	0	1920000				5	5	8	0	0	0	Carbamidomethylation; Oxidation (M)	28804	Phosphoglycerate mutase 1 OS=Homo sapiens OX=9606 GN=PGAM1 PE=1 SV=2
386	2270	tr|A0A1W2PR46|A0A1W2PR46_HUMAN	123.75	9	8	9	7	7	1790000	11800000			7	1	9	10	11	10	Oxidation (M); Deamidation (NQ)	57360	Glial fibrillary acidic protein OS=Homo sapiens OX=9606 GN=GFAP PE=1 SV=1
386	2297	sp|P14136|GFAP_HUMAN	123.75	10	10	10	8	8	1790000	11800000			7	1	9	10	11	10	Oxidation (M); Deamidation (NQ)	49880	Glial fibrillary acidic protein OS=Homo sapiens OX=9606 GN=GFAP PE=1 SV=1
386	2298	tr|K7EMP8|K7EMP8_HUMAN	123.75	10	10	10	8	8	1790000	11800000			7	1	9	10	11	10	Oxidation (M); Deamidation (NQ)	49880	Glial fibrillary acidic protein OS=Homo sapiens OX=9606 GN=GFAP PE=1 SV=2
386	2302	tr|A0A1X7SBR3|A0A1X7SBR3_HUMAN	123.75	9	9	9	7	7	1790000	11800000			7	1	9	10	11	10	Oxidation (M); Deamidation (NQ)	54244	Glial fibrillary acidic protein OS=Homo sapiens OX=9606 GN=GFAP PE=1 SV=1
665	1083	sp|Q9UNX4|WDR3_HUMAN	123.69	12	0	0	12	4			4630000	974000	12	12	0	0	15	6		106099	WD repeat-containing protein 3 OS=Homo sapiens OX=9606 GN=WDR3 PE=1 SV=1
702	1138	sp|Q9NZC9|SMAL1_HUMAN	123.45	12	0	0	9	9			1230000	877000	10	9	0	0	10	9	Oxidation (M); Deamidation (NQ)	105938	SWI/SNF-related matrix-associated actin-dependent regulator of chromatin subfamily A-like protein 1 OS=Homo sapiens OX=9606 GN=SMARCAL1 PE=1 SV=1
421	2449	tr|A0A0J9YY99|A0A0J9YY99_HUMAN	123.26	32	32	32	0	0	320000	145000			5	1	21	17	0	0	Carbamidomethylation; Oxidation (M); Deamidation (NQ)	12965	Uncharacterized protein (Fragment) OS=Homo sapiens OX=9606 PE=1 SV=1
430	2056	sp|A0A0B4J1V1|HV321_HUMAN	123.21	44	44	44	0	0					9	0	21	19	0	0	Carbamidomethylation; Oxidation (M); Deamidation (NQ)	12840	Immunoglobulin heavy variable 3-21 OS=Homo sapiens OX=9606 GN=IGHV3-21 PE=1 SV=1
404	2518	sp|A0A0J9YX35|HV64D_HUMAN	123.21	41	41	38	0	0	33700000	27200000			6	2	22	19	0	0	Carbamidomethylation; Oxidation (M); Deamidation (NQ)	12823	Immunoglobulin heavy variable 3-64D OS=Homo sapiens OX=9606 GN=IGHV3-64D PE=3 SV=1
1134	1854	tr|A0A0A0MRL6|A0A0A0MRL6_HUMAN	123	12	1	1	10	1	30200000	31200000	3400000	675000	7	7	2	2	5	1		84357	Actin-binding LIM protein 1 OS=Homo sapiens OX=9606 GN=ABLIM1 PE=1 SV=1
1134	1855	tr|F8W8M4|F8W8M4_HUMAN	123	12	1	1	10	1	30200000	31200000	3400000	675000	7	7	2	2	5	1		81105	Actin-binding LIM protein 1 OS=Homo sapiens OX=9606 GN=ABLIM1 PE=1 SV=1
1134	1857	sp|O14639|ABLM1_HUMAN	123	11	1	1	9	1	30200000	31200000	3400000	675000	7	7	2	2	5	1		87688	Actin-binding LIM protein 1 OS=Homo sapiens OX=9606 GN=ABLIM1 PE=1 SV=3
1134	1858	tr|A0A3B3IS55|A0A3B3IS55_HUMAN	123	11	1	1	9	1	30200000	31200000	3400000	675000	7	7	2	2	5	1		94098	Actin-binding LIM protein 1 OS=Homo sapiens OX=9606 GN=ABLIM1 PE=1 SV=1
681	1227	tr|A0A0D9SEI3|A0A0D9SEI3_HUMAN	122.54	21	4	0	15	11	292000		4860000	2320000	16	15	1	0	16	12	Carbamidomethylation; Oxidation (M)	89438	Cyclin-dependent kinase 11B OS=Homo sapiens OX=9606 GN=CDK11B PE=1 SV=1
681	1228	tr|A0A0D9SER5|A0A0D9SER5_HUMAN	122.54	21	4	0	15	11	292000		4860000	2320000	16	15	1	0	16	12	Carbamidomethylation; Oxidation (M)	90232	Cyclin-dependent kinase 11B OS=Homo sapiens OX=9606 GN=CDK11B PE=1 SV=1
681	1229	tr|A0A0D9SEN2|A0A0D9SEN2_HUMAN	122.54	21	4	0	15	11	292000		4860000	2320000	16	15	1	0	16	12	Carbamidomethylation; Oxidation (M)	90626	Cyclin-dependent kinase 11B OS=Homo sapiens OX=9606 GN=CDK11B PE=1 SV=1
681	1230	sp|P21127|CD11B_HUMAN	122.54	20	4	0	15	11	292000		4860000	2320000	16	15	1	0	16	12	Carbamidomethylation; Oxidation (M)	92620	Cyclin-dependent kinase 11B OS=Homo sapiens OX=9606 GN=CDK11B PE=1 SV=4
629	1467	sp|Q9NTJ5|SAC1_HUMAN	122.52	28	0	0	22	19			11900000	7440000	16	15	0	0	15	10	Acetylation (Protein N-term); Deamidation (NQ)	66967	Phosphatidylinositide phosphatase SAC1 OS=Homo sapiens OX=9606 GN=SACM1L PE=1 SV=2
907	2304	sp|Q9Y232|CDYL_HUMAN	122.26	9	1	0	8	6	0		2900000	1380000	5	5	1	0	5	4		66482	Chromodomain Y-like protein OS=Homo sapiens OX=9606 GN=CDYL PE=1 SV=2
820	1639	sp|Q9BZ95|NSD3_HUMAN	122.23	6	0	0	4	5			2290000	1030000	8	7	1	0	8	7		161613	Histone-lysine N-methyltransferase NSD3 OS=Homo sapiens OX=9606 GN=NSD3 PE=1 SV=1
794	1340	sp|P34932|HSP74_HUMAN	122.15	11	2	0	9	9			2680000	3590000	8	6	1	0	6	7	Carbamidomethylation; Deamidation (NQ)	94331	Heat shock 70 kDa protein 4 OS=Homo sapiens OX=9606 GN=HSPA4 PE=1 SV=4
794	1392	tr|A0A087WYC1|A0A087WYC1_HUMAN	122.15	12	2	0	9	10			2500000	3590000	7	5	1	0	5	7	Carbamidomethylation	78606	Heat shock 70 kDa protein 4 OS=Homo sapiens OX=9606 GN=HSPA4 PE=1 SV=1
794	1521	tr|A0A087WTS8|A0A087WTS8_HUMAN	122.15	16	3	0	13	14			2500000	3410000	6	4	1	0	5	6	Carbamidomethylation	52600	Heat shock 70 kDa protein 4 OS=Homo sapiens OX=9606 GN=HSPA4 PE=1 SV=1
366	2515	sp|P01772|HV333_HUMAN	122.12	49	49	32	0	0	14600000	11400000			7	1	26	21	0	0	Carbamidomethylation; Oxidation (M); Deamidation (NQ)	13074	Immunoglobulin heavy variable 3-33 OS=Homo sapiens OX=9606 GN=IGHV3-33 PE=1 SV=2
811	1657	sp|P51812|KS6A3_HUMAN	122.06	10	0	0	9	6			1610000	783000	6	4	0	0	6	8		83736	Ribosomal protein S6 kinase alpha-3 OS=Homo sapiens OX=9606 GN=RPS6KA3 PE=1 SV=1
811	1661	tr|B1AXG1|B1AXG1_HUMAN	122.06	11	0	0	9	6			1610000	783000	6	4	0	0	6	8		80751	Non-specific serine/threonine protein kinase OS=Homo sapiens OX=9606 GN=RPS6KA3 PE=1 SV=2
811	1662	tr|B4DG22|B4DG22_HUMAN	122.06	11	0	0	9	6			1610000	783000	6	4	0	0	6	8		80584	Non-specific serine/threonine protein kinase OS=Homo sapiens OX=9606 GN=RPS6KA3 PE=1 SV=1
811	1663	tr|B7ZB17|B7ZB17_HUMAN	122.06	11	0	0	9	6			1610000	783000	6	4	0	0	6	8		80712	Non-specific serine/threonine protein kinase OS=Homo sapiens OX=9606 GN=RPS6KA3 PE=1 SV=1
873	1359	sp|Q8TEM1|PO210_HUMAN	122.04	5	0	0	5	3			6040000	3250000	9	9	0	0	9	6		205109	Nuclear pore membrane glycoprotein 210 OS=Homo sapiens OX=9606 GN=NUP210 PE=1 SV=3
777	2123	sp|P62701|RS4X_HUMAN	121.4	20	20	3	3	7	1570000	226000	1010000	770000	5	5	6	2	2	3	Carbamidomethylation; Deamidation (NQ)	29598	40S ribosomal protein S4 X isoform OS=Homo sapiens OX=9606 GN=RPS4X PE=1 SV=2
917	1811	sp|Q9UMS4|PRP19_HUMAN	121.25	18	0	3	18	5		0	6910000	1190000	7	7	0	1	9	2	Carbamidomethylation	55181	Pre-mRNA-processing factor 19 OS=Homo sapiens OX=9606 GN=PRPF19 PE=1 SV=1
803	1955	sp|Q13188|STK3_HUMAN	120.98	16	2	0	12	9	0		164000		7	2	1	0	10	4	Oxidation (M); Deamidation (NQ)	56301	Serine/threonine-protein kinase 3 OS=Homo sapiens OX=9606 GN=STK3 PE=1 SV=2
1189	2726	sp|O95503|CBX6_HUMAN	120.93	13	0	0	13	10			1310000	416000	3	3	0	0	3	2		43898	Chromobox protein homolog 6 OS=Homo sapiens OX=9606 GN=CBX6 PE=1 SV=1
1189	2739	tr|B0QXZ6|B0QXZ6_HUMAN	120.93	13	0	0	13	11			1310000	416000	3	3	0	0	3	2		41918	Chromobox protein homolog 6 OS=Homo sapiens OX=9606 GN=CBX6 PE=1 SV=1
839	1517	sp|P46060|RAGP1_HUMAN	120.92	16	0	0	14	6			5050000	1820000	9	9	0	0	9	4		63542	Ran GTPase-activating protein 1 OS=Homo sapiens OX=9606 GN=RANGAP1 PE=1 SV=1
954	2426	sp|Q15906|VPS72_HUMAN	120.67	19	0	0	19	6			9430000	1190000	6	6	0	0	6	4		40594	Vacuolar protein sorting-associated protein 72 homolog OS=Homo sapiens OX=9606 GN=VPS72 PE=1 SV=1
949	1783	tr|Q5JW28|Q5JW28_HUMAN	120.47	32	0	4	28	26			212000		7	1	0	3	5	5		22475	Double-stranded RNA-binding protein Staufen homolog 1 (Fragment) OS=Homo sapiens OX=9606 GN=STAU1 PE=1 SV=1
950	1835	sp|P13674|P4HA1_HUMAN	120.42	16	0	0	12	8			4130000	1040000	7	7	0	0	5	4		61049	Prolyl 4-hydroxylase subunit alpha-1 OS=Homo sapiens OX=9606 GN=P4HA1 PE=1 SV=2
852	1606	sp|Q02790|FKBP4_HUMAN	120.31	17	4	0	17	12	17700		5250000	2940000	7	7	3	0	8	4	Carbamidomethylation	51805	Peptidyl-prolyl cis-trans isomerase FKBP4 OS=Homo sapiens OX=9606 GN=FKBP4 PE=1 SV=3
391	2470	sp|P35900|K1C20_HUMAN	120.31	7	6	4	7	3			72900		7	1	8	9	15	8		48487	Keratin type I cytoskeletal 20 OS=Homo sapiens OX=9606 GN=KRT20 PE=1 SV=1
732	1434	sp|Q8TD19|NEK9_HUMAN	120.09	10	1	0	10	5	0		1380000	379000	7	7	1	0	11	5	Carbamidomethylation; Deamidation (NQ)	107168	Serine/threonine-protein kinase Nek9 OS=Homo sapiens OX=9606 GN=NEK9 PE=1 SV=2
486	2080	tr|D6RD18|D6RD18_HUMAN	119.96	25	14	24	15	11	730000	461000	4710000	4120000	6	5	11	5	9	7	Carbamidomethylation; Deamidation (NQ)	30474	Heterogeneous nuclear ribonucleoprotein A/B OS=Homo sapiens OX=9606 GN=HNRNPAB PE=1 SV=1
876	1674	sp|Q8NE71|ABCF1_HUMAN	119.95	13	0	2	8	9		0	1330000	1540000	9	9	0	1	9	7	Carbamidomethylation; Oxidation (M); Deamidation (NQ)	95926	ATP-binding cassette sub-family F member 1 OS=Homo sapiens OX=9606 GN=ABCF1 PE=1 SV=2
876	1736	tr|H0YGW7|H0YGW7_HUMAN	119.95	17	0	3	10	10		0	768000	1070000	8	8	0	1	8	6	Carbamidomethylation; Oxidation (M); Deamidation (NQ)	67669	ATP-binding cassette sub-family F member 1 (Fragment) OS=Homo sapiens OX=9606 GN=ABCF1 PE=1 SV=1
659	1264	sp|Q92616|GCN1_HUMAN	119.74	5	0	0	5	3			2470000	748000	15	14	0	0	15	8	Carbamidomethylation	292756	eIF-2-alpha kinase activator GCN1 OS=Homo sapiens OX=9606 GN=GCN1 PE=1 SV=6
445	1710	tr|A0A087WUK2|A0A087WUK2_HUMAN	119.67	20	7	7	13	18	288000	298000	2050000	2310000	7	5	11	4	9	11	Carbamidomethylation	40040	Heterogeneous nuclear ribonucleoprotein D-like isoform CRA_b OS=Homo sapiens OX=9606 GN=HNRNPDL PE=1 SV=1
445	1714	sp|O14979|HNRDL_HUMAN	119.67	17	6	6	11	15	288000	298000	2050000	2310000	7	5	11	4	9	11	Carbamidomethylation	46438	Heterogeneous nuclear ribonucleoprotein D-like OS=Homo sapiens OX=9606 GN=HNRNPDL PE=1 SV=3
871	1474	sp|Q9BVJ6|UT14A_HUMAN	119.65	13	0	0	12	5			1800000	339000	8	8	0	0	8	3		87978	U3 small nucleolar RNA-associated protein 14 homolog A OS=Homo sapiens OX=9606 GN=UTP14A PE=1 SV=1
512	1406	sp|O14647|CHD2_HUMAN	119.2	11	0	0	7	9			5160000	3540000	19	11	0	0	15	16	Oxidation (M)	211342	Chromodomain-helicase-DNA-binding protein 2 OS=Homo sapiens OX=9606 GN=CHD2 PE=1 SV=2
725	1770	tr|A0A0A0MR09|A0A0A0MR09_HUMAN	119.12	12	2	1	6	10	87100		2090000	2470000	7	6	1	1	7	8	Carbamidomethylation; Oxidation (M); Deamidation (NQ)	66954	Tyrosine-protein phosphatase non-receptor type 9 OS=Homo sapiens OX=9606 GN=PTPN9 PE=1 SV=1
725	1771	sp|P43378|PTN9_HUMAN	119.12	12	2	1	6	10	87100		2090000	2470000	7	6	1	1	7	8	Carbamidomethylation; Oxidation (M); Deamidation (NQ)	68020	Tyrosine-protein phosphatase non-receptor type 9 OS=Homo sapiens OX=9606 GN=PTPN9 PE=1 SV=1
754	1242	sp|Q6P1J9|CDC73_HUMAN	119.09	19	0	0	19	14			4750000	2430000	10	10	0	0	10	7	Acetylation (Protein N-term)	60577	Parafibromin OS=Homo sapiens OX=9606 GN=CDC73 PE=1 SV=1
754	1267	tr|A0A3B3IRP5|A0A3B3IRP5_HUMAN	119.09	20	0	0	20	16			4500000	2430000	9	9	0	0	9	7	Acetylation (Protein N-term)	54156	Parafibromin OS=Homo sapiens OX=9606 GN=CDC73 PE=1 SV=1
600	1297	sp|P63010|AP2B1_HUMAN	118.98	14	0	1	12	9		92300	7720000	5880000	14	14	0	1	15	12	Carbamidomethylation	104553	AP-2 complex subunit beta OS=Homo sapiens OX=9606 GN=AP2B1 PE=1 SV=1
782	1383	sp|O95747|OXSR1_HUMAN	118.93	18	0	0	18	10			6690000	2250000	9	9	0	0	10	6		58022	Serine/threonine-protein kinase OSR1 OS=Homo sapiens OX=9606 GN=OXSR1 PE=1 SV=1
859	2086	sp|Q7L591|DOK3_HUMAN	118.86	14	0	0	14	14			3470000	2780000	5	5	0	0	6	7		53288	Docking protein 3 OS=Homo sapiens OX=9606 GN=DOK3 PE=1 SV=2
859	2099	tr|D6RAM3|D6RAM3_HUMAN	118.86	15	0	0	15	15			3470000	2780000	5	5	0	0	6	7		47602	Docking protein 3 OS=Homo sapiens OX=9606 GN=DOK3 PE=1 SV=1
872	2007	sp|Q92598|HS105_HUMAN	118.58	7	2	0	5	6			482000	327000	5	3	1	0	4	5	Carbamidomethylation	96865	Heat shock protein 105 kDa OS=Homo sapiens OX=9606 GN=HSPH1 PE=1 SV=1
1015	2267	sp|Q9BYJ9|YTHD1_HUMAN	118.51	11	0	0	6	9			982000	2610000	6	5	0	0	3	5	Oxidation (M)	60874	YTH domain-containing family protein 1 OS=Homo sapiens OX=9606 GN=YTHDF1 PE=1 SV=1
767	2013	tr|G3V203|G3V203_HUMAN	118.43	33	29	16	16	16	213000	397000	571000	426000	6	6	4	5	3	3		18756	60S ribosomal protein L18 OS=Homo sapiens OX=9606 GN=RPL18 PE=1 SV=1
767	2014	sp|Q07020|RL18_HUMAN	118.43	29	25	14	14	14	213000	397000	571000	426000	6	6	4	5	3	3		21634	60S ribosomal protein L18 OS=Homo sapiens OX=9606 GN=RPL18 PE=1 SV=2
767	2015	tr|J3QQ67|J3QQ67_HUMAN	118.43	28	25	14	14	14	213000	397000	571000	426000	6	6	4	5	3	3		21847	60S ribosomal protein L18 (Fragment) OS=Homo sapiens OX=9606 GN=RPL18 PE=1 SV=1
905	1814	sp|P49591|SYSC_HUMAN	118.21	17	0	2	16	7		2600	3900000	1720000	9	9	0	1	8	4	Carbamidomethylation	58777	Serine--tRNA ligase cytoplasmic OS=Homo sapiens OX=9606 GN=SARS PE=1 SV=3
905	1815	tr|Q5T5C7|Q5T5C7_HUMAN	118.21	16	0	2	15	7		2600	3900000	1720000	9	9	0	1	8	4	Carbamidomethylation	61313	Serine--tRNA ligase cytoplasmic OS=Homo sapiens OX=9606 GN=SARS PE=1 SV=1
761	1475	sp|Q9NZ08|ERAP1_HUMAN	118.19	7	0	0	6	6			6980000	4190000	7	7	0	0	8	7	Carbamidomethylation	107235	Endoplasmic reticulum aminopeptidase 1 OS=Homo sapiens OX=9606 GN=ERAP1 PE=1 SV=3
1014	2653	sp|Q92973|TNPO1_HUMAN	117.42	5	0	0	5	2			2310000	1320000	5	5	0	0	7	2		102355	Transportin-1 OS=Homo sapiens OX=9606 GN=TNPO1 PE=1 SV=2
664	1235	sp|O95696|BRD1_HUMAN	117.31	10	0	0	8	9			3070000	2670000	11	10	0	0	11	11	Deamidation (NQ)	119520	Bromodomain-containing protein 1 OS=Homo sapiens OX=9606 GN=BRD1 PE=1 SV=1
748	1856	sp|P12235|ADT1_HUMAN	116.9	17	17	3	5	12	75500				6	1	7	1	3	6		33065	ADP/ATP translocase 1 OS=Homo sapiens OX=9606 GN=SLC25A4 PE=1 SV=4
528	2573	tr|Q2L6G8|Q2L6G8_HUMAN	116.55	13	11	11	9	9	4620000	4580000	2400000	2290000	8	8	7	11	6	6	Carbamidomethylation; Deamidation (NQ)	51539	CDSN OS=Homo sapiens OX=9606 GN=CDSN PE=1 SV=1
528	2574	tr|G8JLG2|G8JLG2_HUMAN	116.55	13	11	11	9	9	4620000	4580000	2400000	2290000	8	8	7	11	6	6	Carbamidomethylation; Deamidation (NQ)	51607	CDSN OS=Homo sapiens OX=9606 GN=CDSN PE=1 SV=1
698	1409	sp|Q6P179|ERAP2_HUMAN	116.54	11	0	0	11	7			7040000	2200000	12	11	0	0	13	9	Deamidation (NQ)	110462	Endoplasmic reticulum aminopeptidase 2 OS=Homo sapiens OX=9606 GN=ERAP2 PE=1 SV=2
795	1305	sp|P98160|PGBM_HUMAN	116.43	4	0	0	1	3		1590000	1160000	1510000	14	14	0	1	6	12	Carbamidomethylation	468835	Basement membrane-specific heparan sulfate proteoglycan core protein OS=Homo sapiens OX=9606 GN=HSPG2 PE=1 SV=4
1032	2283	tr|K7EP90|K7EP90_HUMAN	116.31	15	0	0	14	13			6360000	4080000	7	7	0	0	5	5	Acetylation (Protein N-term)	48024	RNA-binding protein 42 OS=Homo sapiens OX=9606 GN=RBM42 PE=1 SV=1
1032	2284	sp|Q9BTD8|RBM42_HUMAN	116.31	15	0	0	13	13			6360000	4080000	7	7	0	0	5	5	Acetylation (Protein N-term)	50414	RNA-binding protein 42 OS=Homo sapiens OX=9606 GN=RBM42 PE=1 SV=1
810	1633	sp|P23396|RS3_HUMAN	116.01	34	30	4	4	11	2530000	22300	0	119000	9	9	9	1	1	3	Carbamidomethylation; Oxidation (M); Deamidation (NQ)	26688	40S ribosomal protein S3 OS=Homo sapiens OX=9606 GN=RPS3 PE=1 SV=2
910	1551	sp|Q969Z0|FAKD4_HUMAN	115.75	14	0	0	11	7			2840000	2250000	8	7	0	0	6	5		70738	FAST kinase domain-containing protein 4 OS=Homo sapiens OX=9606 GN=TBRG4 PE=1 SV=1
816	1465	sp|Q6PCB7|S27A1_HUMAN	115.44	13	0	0	9	10			2810000	5180000	7	5	0	0	5	8		71108	Long-chain fatty acid transport protein 1 OS=Homo sapiens OX=9606 GN=SLC27A1 PE=1 SV=1
823	1499	tr|H3BMM5|H3BMM5_HUMAN	115.41	18	0	3	12	15		176000	3280000	5920000	11	11	0	1	8	10	Acetylation (Protein N-term)	61239	Uncharacterized protein OS=Homo sapiens OX=9606 PE=3 SV=1
823	1501	sp|Q96AX1|VP33A_HUMAN	115.41	16	0	2	11	13		176000	3280000	5920000	11	11	0	1	8	10	Acetylation (Protein N-term)	67611	Vacuolar protein sorting-associated protein 33A OS=Homo sapiens OX=9606 GN=VPS33A PE=1 SV=1
823	1506	tr|A0A2R8YF87|A0A2R8YF87_HUMAN	115.41	15	0	2	10	12		176000	3280000	5920000	11	11	0	1	8	10	Acetylation (Protein N-term)	71696	Vacuolar protein sorting-associated protein 33A OS=Homo sapiens OX=9606 GN=VPS33A PE=1 SV=1
755	1513	sp|Q9NPQ8|RIC8A_HUMAN	115.09	18	0	0	9	18			2300000	5620000	9	9	0	0	7	11	Carbamidomethylation; Deamidation (NQ)	59710	Synembryn-A OS=Homo sapiens OX=9606 GN=RIC8A PE=1 SV=3
812	2473	sp|P15311|EZRI_HUMAN	114.91	6	3	0	6	4	227000		14800000	13100000	5	3	2	0	7	4	Deamidation (NQ)	69413	Ezrin OS=Homo sapiens OX=9606 GN=EZR PE=1 SV=4
812	2474	tr|E7EQR4|E7EQR4_HUMAN	114.91	6	3	0	6	4	227000		14800000	13100000	5	3	2	0	7	4	Deamidation (NQ)	69372	Ezrin OS=Homo sapiens OX=9606 GN=EZR PE=1 SV=3
940	1754	sp|P32780|TF2H1_HUMAN	114.79	11	0	0	9	8			1640000	873000	6	6	0	0	5	4	Carbamidomethylation; Acetylation (Protein N-term); Oxidation (M)	62032	General transcription factor IIH subunit 1 OS=Homo sapiens OX=9606 GN=GTF2H1 PE=1 SV=1
304	2398	sp|P0C0S5|H2AZ_HUMAN	114.52	31	31	31	31	31	1580000	1210000	1890000	1040000	5	2	14	15	12	14	Deamidation (NQ)	13553	Histone H2A.Z OS=Homo sapiens OX=9606 GN=H2AFZ PE=1 SV=2
304	2399	sp|Q71UI9|H2AV_HUMAN	114.52	31	31	31	31	31	1580000	1210000	1890000	1040000	5	2	14	15	12	14	Deamidation (NQ)	13509	Histone H2A.V OS=Homo sapiens OX=9606 GN=H2AFV PE=1 SV=3
675	1459	sp|Q96S55|WRIP1_HUMAN	114.29	14	0	1	10	8		12300	3810000	5280000	9	9	0	1	10	7	Deamidation (NQ)	72133	ATPase WRNIP1 OS=Homo sapiens OX=9606 GN=WRNIP1 PE=1 SV=2
829	1386	sp|Q14684|RRP1B_HUMAN	114.1	15	0	1	14	4		200000	2310000	277000	10	10	0	1	10	4	Carbamidomethylation; Deamidation (NQ)	84428	Ribosomal RNA processing protein 1 homolog B OS=Homo sapiens OX=9606 GN=RRP1B PE=1 SV=3
779	1540	sp|P12931|SRC_HUMAN	114.01	15	1	0	15	7			1010000		9	3	1	0	11	5	Carbamidomethylation	59835	Proto-oncogene tyrosine-protein kinase Src OS=Homo sapiens OX=9606 GN=SRC PE=1 SV=3
550	2517	sp|Q9H4B7|TBB1_HUMAN	113.97	10	6	4	6	10				39200	6	1	7	8	8	9	Oxidation (M)	50327	Tubulin beta-1 chain OS=Homo sapiens OX=9606 GN=TUBB1 PE=1 SV=1
453	2870	tr|K7EJU1|K7EJU1_HUMAN	113.48	13	10	10	11	13				308000	6	1	6	8	9	10	Deamidation (NQ)	28453	Glial fibrillary acidic protein (Fragment) OS=Homo sapiens OX=9606 GN=GFAP PE=1 SV=1
1233	2525	sp|P60174|TPIS_HUMAN	113.25	21	18	0	0	3	728000			1540000	5	5	4	0	0	1	Carbamidomethylation	30791	Triosephosphate isomerase OS=Homo sapiens OX=9606 GN=TPI1 PE=1 SV=3
1016	2271	sp|P35611|ADDA_HUMAN	113.19	9	0	0	8	8			263000	517000	5	5	0	0	4	4		80955	Alpha-adducin OS=Homo sapiens OX=9606 GN=ADD1 PE=1 SV=2
1016	2272	tr|E7EV99|E7EV99_HUMAN	113.19	11	0	0	9	9			263000	517000	5	5	0	0	4	4		70056	Alpha-adducin OS=Homo sapiens OX=9606 GN=ADD1 PE=1 SV=1
1016	2273	tr|E7ENY0|E7ENY0_HUMAN	113.19	10	0	0	9	9			263000	517000	5	5	0	0	4	4		73404	Alpha-adducin OS=Homo sapiens OX=9606 GN=ADD1 PE=1 SV=1
824	1809	sp|P50416|CPT1A_HUMAN	113.09	11	0	0	7	10			3060000	1670000	8	8	0	0	6	9	Oxidation (M)	88368	Carnitine O-palmitoyltransferase 1 liver isoform OS=Homo sapiens OX=9606 GN=CPT1A PE=1 SV=2
727	1415	sp|O15226|NKRF_HUMAN	113.09	17	0	0	13	13			3360000	2970000	11	11	0	0	9	10	Carbamidomethylation	77673	NF-kappa-B-repressing factor OS=Homo sapiens OX=9606 GN=NKRF PE=1 SV=2
394	1807	tr|B4DY09|B4DY09_HUMAN	113.07	27	24	11	10	13	1560000	446000	1250000	1760000	8	8	12	5	13	9	Deamidation (NQ)	38910	cDNA FLJ51660 highly similar to Interleukin enhancer-binding factor 2 OS=Homo sapiens OX=9606 GN=ILF2 PE=1 SV=1
394	1808	sp|Q12905|ILF2_HUMAN	113.07	24	22	10	9	12	1560000	446000	1250000	1760000	8	8	12	5	13	9	Deamidation (NQ)	43062	Interleukin enhancer-binding factor 2 OS=Homo sapiens OX=9606 GN=ILF2 PE=1 SV=2
1129	3386	sp|Q69YQ0|CYTSA_HUMAN	113.07	5	0	0	5	2			2000000	70000	5	5	0	0	7	1		124602	Cytospin-A OS=Homo sapiens OX=9606 GN=SPECC1L PE=1 SV=2
1129	3411	tr|F8WAN1|F8WAN1_HUMAN	113.07	6	0	0	6	2			2000000	70000	4	4	0	0	6	1		101514	SPECC1L-ADORA2A readthrough (NMD candidate) OS=Homo sapiens OX=9606 GN=SPECC1L-ADORA2A PE=4 SV=2
990	2103	sp|Q5SRE5|NU188_HUMAN	112.85	4	0	0	4	2			1340000	345000	5	5	0	0	6	2		196041	Nucleoporin NUP188 homolog OS=Homo sapiens OX=9606 GN=NUP188 PE=1 SV=1
770	1478	sp|P52948|NUP98_HUMAN	112.43	5	0	0	4	2			2390000	962000	9	9	0	0	10	7		197578	Nuclear pore complex protein Nup98-Nup96 OS=Homo sapiens OX=9606 GN=NUP98 PE=1 SV=4
1054	2044	sp|Q96A65|EXOC4_HUMAN	112.43	7	1	0	7	2	31800		845000	208000	6	6	1	0	5	4		110498	Exocyst complex component 4 OS=Homo sapiens OX=9606 GN=EXOC4 PE=1 SV=1
937	1608	sp|Q96ST3|SIN3A_HUMAN	112.29	9	0	0	9	2			3130000	332000	9	9	0	0	10	3		145175	Paired amphipathic helix protein Sin3a OS=Homo sapiens OX=9606 GN=SIN3A PE=1 SV=2
1087	2571	sp|O00629|IMA3_HUMAN	112.27	10	0	0	9	3			1080000		5	1	0	0	5	2		57887	Importin subunit alpha-3 OS=Homo sapiens OX=9606 GN=KPNA4 PE=1 SV=1
759	1685	sp|Q9UBF2|COPG2_HUMAN	112.25	8	0	0	8	4			2560000	2870000	7	4	0	0	10	8	Carbamidomethylation; Oxidation (M); Deamidation (NQ)	97622	Coatomer subunit gamma-2 OS=Homo sapiens OX=9606 GN=COPG2 PE=1 SV=1
962	1870	sp|Q92620|PRP16_HUMAN	111.8	6	0	1	4	4		14500	571000	631000	6	6	0	1	5	4		140502	Pre-mRNA-splicing factor ATP-dependent RNA helicase PRP16 OS=Homo sapiens OX=9606 GN=DHX38 PE=1 SV=2
763	1675	sp|Q8ND56|LS14A_HUMAN	111.7	19	2	0	16	12	82300		13200000	5270000	10	10	2	0	11	5	Carbamidomethylation; Acetylation (Protein N-term)	50530	Protein LSM14 homolog A OS=Homo sapiens OX=9606 GN=LSM14A PE=1 SV=3
433	1874	sp|A0A0B4J1V0|HV315_HUMAN	111.68	46	46	46	0	0	6820000	9310000			8	2	19	16	0	0	Oxidation (M)	12926	Immunoglobulin heavy variable 3-15 OS=Homo sapiens OX=9606 GN=IGHV3-15 PE=3 SV=1
837	1738	sp|P22102|PUR2_HUMAN	111.42	6	0	0	6	6			2200000	993000	6	6	0	0	7	6	Carbamidomethylation	107767	Trifunctional purine biosynthetic protein adenosine-3 OS=Homo sapiens OX=9606 GN=GART PE=1 SV=1
757	1470	sp|Q5TA45|INT11_HUMAN	111.2	15	0	1	10	12		69500	6790000	8070000	9	9	0	1	9	8	Carbamidomethylation; Oxidation (M); Deamidation (NQ)	67663	Integrator complex subunit 11 OS=Homo sapiens OX=9606 GN=INTS11 PE=1 SV=2
991	1787	sp|Q6PGP7|TTC37_HUMAN	110.96	4	0	0	4	1			1010000	63100	7	7	0	0	7	1		175485	Tetratricopeptide repeat protein 37 OS=Homo sapiens OX=9606 GN=TTC37 PE=1 SV=1
888	1463	sp|Q9UJX2|CDC23_HUMAN	110.95	17	0	0	15	10			3440000	2790000	9	9	0	0	8	7	Carbamidomethylation; Oxidation (M); Deamidation (NQ)	68834	Cell division cycle protein 23 homolog OS=Homo sapiens OX=9606 GN=CDC23 PE=1 SV=3
746	2049	sp|Q9Y2R4|DDX52_HUMAN	110.75	13	0	0	7	13			491000	3820000	7	6	0	0	4	12	Carbamidomethylation; Acetylation (Protein N-term); Oxidation (M)	67498	Probable ATP-dependent RNA helicase DDX52 OS=Homo sapiens OX=9606 GN=DDX52 PE=1 SV=3
1040	1741	sp|P05091|ALDH2_HUMAN	110.52	17	16	4	0	1	1240000	98700			8	7	7	2	0	1		56381	Aldehyde dehydrogenase mitochondrial OS=Homo sapiens OX=9606 GN=ALDH2 PE=1 SV=2
972	2223	sp|Q9Y4A0|JERKL_HUMAN	110.47	15	0	0	15	9			2340000	1130000	5	5	0	0	5	4	Carbamidomethylation	59912	Jerky protein homolog-like OS=Homo sapiens OX=9606 GN=JRKL PE=2 SV=2
599	1610	sp|O15042|SR140_HUMAN	110.32	10	0	0	10	7			8690000	6480000	9	9	0	0	13	10		118292	U2 snRNP-associated SURP motif-containing protein OS=Homo sapiens OX=9606 GN=U2SURP PE=1 SV=2
1206	2963	sp|Q15084|PDIA6_HUMAN	110.3	10	10	6	0	0	250000	269000			3	3	3	2	0	0		48121	Protein disulfide-isomerase A6 OS=Homo sapiens OX=9606 GN=PDIA6 PE=1 SV=1
856	1917	sp|Q9UIS9|MBD1_HUMAN	110.28	10	0	1	4	10		53900	1500000	2410000	7	7	0	1	5	8		66607	Methyl-CpG-binding domain protein 1 OS=Homo sapiens OX=9606 GN=MBD1 PE=1 SV=2
856	1996	tr|A0A0A0MS90|A0A0A0MS90_HUMAN	110.28	10	0	1	4	10		53900	1500000	2410000	7	7	0	1	5	8		62400	Methyl-CpG-binding domain protein 1 OS=Homo sapiens OX=9606 GN=MBD1 PE=1 SV=1
946	2258	sp|Q8NEF9|SRFB1_HUMAN	110.25	12	0	0	12	5			3260000	332000	4	4	0	0	4	4		48634	Serum response factor-binding protein 1 OS=Homo sapiens OX=9606 GN=SRFBP1 PE=1 SV=1
678	2659	tr|A0A0B4J259|A0A0B4J259_HUMAN	110.12	26	14	26	9	9	1310000	3700000	1970000	1500000	4	4	3	11	2	2	Oxidation (M); Deamidation (NQ)	15329	Lysozyme OS=Homo sapiens OX=9606 GN=LYZ PE=1 SV=1
678	2660	sp|P61626|LYSC_HUMAN	110.12	24	13	24	8	8	1310000	3700000	1970000	1500000	4	4	3	11	2	2	Oxidation (M); Deamidation (NQ)	16537	Lysozyme C OS=Homo sapiens OX=9606 GN=LYZ PE=1 SV=1
678	2669	tr|F8VV32|F8VV32_HUMAN	110.12	35	18	35	12	12	1310000	3700000	1970000	1500000	4	4	3	11	2	2	Oxidation (M); Deamidation (NQ)	11488	Lysozyme OS=Homo sapiens OX=9606 GN=LYZ PE=1 SV=1
662	1391	sp|O14646|CHD1_HUMAN	109.8	7	1	1	5	5	0	575000	1620000	925000	13	6	1	4	10	9	Oxidation (M); Deamidation (NQ)	196687	Chromodomain-helicase-DNA-binding protein 1 OS=Homo sapiens OX=9606 GN=CHD1 PE=1 SV=2
749	2218	sp|P18124|RL7_HUMAN	109.78	28	24	24	4	4	1840000	586000	241000	218000	7	7	10	7	1	1	Oxidation (M); Deamidation (NQ)	29226	60S ribosomal protein L7 OS=Homo sapiens OX=9606 GN=RPL7 PE=1 SV=1
749	2219	tr|A8MUD9|A8MUD9_HUMAN	109.78	34	28	29	5	5	1840000	586000	241000	218000	7	7	10	7	1	1	Oxidation (M); Deamidation (NQ)	24433	60S ribosomal protein L7 OS=Homo sapiens OX=9606 GN=RPL7 PE=1 SV=1
1005	1693	sp|O60341|KDM1A_HUMAN	109.7	11	0	0	11	3			1330000	337000	8	8	0	0	8	3	Carbamidomethylation	92903	Lysine-specific histone demethylase 1A OS=Homo sapiens OX=9606 GN=KDM1A PE=1 SV=2
1232	2744	sp|Q9NYY8|FAKD2_HUMAN	109.64	5	0	0	4	3			448000	409000	3	3	0	0	2	2		81463	FAST kinase domain-containing protein 2 mitochondrial OS=Homo sapiens OX=9606 GN=FASTKD2 PE=1 SV=1
745	1689	sp|Q8N1F7|NUP93_HUMAN	109.57	10	0	0	6	10			1890000	994000	8	7	0	0	8	12	Carbamidomethylation	93488	Nuclear pore complex protein Nup93 OS=Homo sapiens OX=9606 GN=NUP93 PE=1 SV=2
745	1692	tr|H3BVG0|H3BVG0_HUMAN	109.57	9	0	0	6	9			1890000	994000	8	7	0	0	8	12	Carbamidomethylation	99555	Nuclear pore complex protein Nup93 OS=Homo sapiens OX=9606 GN=NUP93 PE=1 SV=1
741	1451	tr|A0A3B3ITU8|A0A3B3ITU8_HUMAN	109.42	5	0	0	4	2			1720000	1070000	16	16	0	0	14	7	Carbamidomethylation	312290	Inositol 1 4 5-trisphosphate receptor type 1 OS=Homo sapiens OX=9606 GN=ITPR1 PE=1 SV=1
741	1452	tr|A0A3B3IU04|A0A3B3IU04_HUMAN	109.42	5	0	0	4	2			1720000	1070000	16	16	0	0	14	7	Carbamidomethylation	312900	Inositol 1 4 5-trisphosphate receptor type 1 OS=Homo sapiens OX=9606 GN=ITPR1 PE=1 SV=1
741	1453	tr|A0A3F2YNW8|A0A3F2YNW8_HUMAN	109.42	5	0	0	4	2			1720000	1070000	16	16	0	0	14	7	Carbamidomethylation	313028	Inositol 1 4 5-trisphosphate receptor type 1 OS=Homo sapiens OX=9606 GN=ITPR1 PE=1 SV=1
741	1454	sp|Q14643|ITPR1_HUMAN	109.42	5	0	0	4	2			1720000	1070000	16	16	0	0	14	7	Carbamidomethylation	313928	Inositol 1 4 5-trisphosphate receptor type 1 OS=Homo sapiens OX=9606 GN=ITPR1 PE=1 SV=3
743	1672	sp|P46063|RECQ1_HUMAN	109.24	13	3	1	5	11	1630000	861000	3880000	5230000	8	8	3	1	4	9	Carbamidomethylation; Oxidation (M); Deamidation (NQ)	73457	ATP-dependent DNA helicase Q1 OS=Homo sapiens OX=9606 GN=RECQL PE=1 SV=3
897	1603	tr|A0A3B3IT01|A0A3B3IT01_HUMAN	109.24	14	0	0	2	14			273000	4970000	9	9	0	0	1	11	Carbamidomethylation	67686	Aspartate--tRNA ligase mitochondrial OS=Homo sapiens OX=9606 GN=DARS2 PE=1 SV=1
897	1605	tr|A0A3B3ISK7|A0A3B3ISK7_HUMAN	109.24	13	0	0	1	13			273000	4970000	9	9	0	0	1	11	Carbamidomethylation	70987	Aspartate--tRNA ligase mitochondrial OS=Homo sapiens OX=9606 GN=DARS2 PE=1 SV=1
897	1607	sp|Q6PI48|SYDM_HUMAN	109.24	13	0	0	1	13			273000	4970000	9	9	0	0	1	11	Carbamidomethylation	73563	Aspartate--tRNA ligase mitochondrial OS=Homo sapiens OX=9606 GN=DARS2 PE=1 SV=1
906	1927	tr|A0A087WVF7|A0A087WVF7_HUMAN	109.18	4	0	0	4	3			1590000	940000	7	7	0	0	7	5	Deamidation (NQ)	191597	Intersectin-2 OS=Homo sapiens OX=9606 GN=ITSN2 PE=1 SV=1
906	1928	sp|Q9NZM3|ITSN2_HUMAN	109.18	4	0	0	4	3			1590000	940000	7	7	0	0	7	5	Deamidation (NQ)	193460	Intersectin-2 OS=Homo sapiens OX=9606 GN=ITSN2 PE=1 SV=3
1041	1763	sp|Q13884|SNTB1_HUMAN	109.07	17	0	0	12	10			2540000	2240000	7	7	0	0	6	4	Acetylation (Protein N-term); Deamidation (NQ)	58061	Beta-1-syntrophin OS=Homo sapiens OX=9606 GN=SNTB1 PE=1 SV=3
1008	2337	sp|P62826|RAN_HUMAN	108.99	20	20	0	13	14	1070000		796000	572000	5	5	5	0	4	3	Carbamidomethylation; Deamidation (NQ)	24423	GTP-binding nuclear protein Ran OS=Homo sapiens OX=9606 GN=RAN PE=1 SV=3
1008	2338	tr|B5MDF5|B5MDF5_HUMAN	108.99	18	18	0	12	13	1070000		796000	572000	5	5	5	0	4	3	Carbamidomethylation; Deamidation (NQ)	26224	GTP-binding nuclear protein Ran OS=Homo sapiens OX=9606 GN=RAN PE=1 SV=1
1008	2350	tr|F5H018|F5H018_HUMAN	108.99	22	22	0	15	15	1070000		796000	572000	5	5	5	0	4	3	Carbamidomethylation; Deamidation (NQ)	22436	GTP-binding nuclear protein Ran (Fragment) OS=Homo sapiens OX=9606 GN=RAN PE=1 SV=8
1008	2351	tr|J3KQE5|J3KQE5_HUMAN	108.99	18	18	0	12	13	1070000		796000	572000	5	5	5	0	4	3	Carbamidomethylation; Deamidation (NQ)	26816	GTP-binding nuclear protein Ran (Fragment) OS=Homo sapiens OX=9606 GN=RAN PE=1 SV=1
936	2352	sp|Q8WTT2|NOC3L_HUMAN	108.91	7	0	0	6	7			658000	1000000	5	5	0	0	4	7		92548	Nucleolar complex protein 3 homolog OS=Homo sapiens OX=9606 GN=NOC3L PE=1 SV=1
607	1819	sp|P01008|ANT3_HUMAN	108.81	13	9	8	8	9	314000	335000			7	1	8	6	6	5		52602	Antithrombin-III OS=Homo sapiens OX=9606 GN=SERPINC1 PE=1 SV=1
700	3636	sp|P20930|FILA_HUMAN	108.8	1	1	1	0	1	1260000	2060000	1190000	1680000	10	10	7	7	3	4	Deamidation (NQ)	435180	Filaggrin OS=Homo sapiens OX=9606 GN=FLG PE=1 SV=3
1048	2419	tr|B6VEX4|B6VEX4_HUMAN	108.69	11	0	0	11	11			3830000	3360000	4	4	0	0	4	4		43295	Abl interactor 1 OS=Homo sapiens OX=9606 GN=ABI1 PE=1 SV=1
1048	2420	tr|A0A0A0MRT6|A0A0A0MRT6_HUMAN	108.69	9	0	0	9	9			3830000	3360000	4	4	0	0	4	4		51770	Abl interactor 1 OS=Homo sapiens OX=9606 GN=ABI1 PE=1 SV=1
1048	2421	sp|Q8IZP0|ABI1_HUMAN	108.69	9	0	0	9	9			3830000	3360000	4	4	0	0	4	4		55081	Abl interactor 1 OS=Homo sapiens OX=9606 GN=ABI1 PE=1 SV=4
1272	2428	sp|Q96S52|PIGS_HUMAN	108.25	12	0	0	0	12				2040000	5	5	0	0	0	5		61656	GPI transamidase component PIG-S OS=Homo sapiens OX=9606 GN=PIGS PE=1 SV=3
1139	2052	sp|Q9BY44|EIF2A_HUMAN	107.63	12	0	0	12	0			6320000		5	5	0	0	5	0		64990	Eukaryotic translation initiation factor 2A OS=Homo sapiens OX=9606 GN=EIF2A PE=1 SV=3
886	1562	tr|A0A0U1RQF0|A0A0U1RQF0_HUMAN	107.61	3	0	0	3	1			729000	589000	8	8	0	0	9	3	Oxidation (M)	273196	Fatty acid synthase OS=Homo sapiens OX=9606 GN=FASN PE=1 SV=1
886	1563	sp|P49327|FAS_HUMAN	107.61	3	0	0	3	1			729000	589000	8	8	0	0	9	3	Oxidation (M)	273424	Fatty acid synthase OS=Homo sapiens OX=9606 GN=FASN PE=1 SV=3
909	1747	sp|Q92541|RTF1_HUMAN	107.61	11	0	0	10	6			1760000	552000	7	7	0	0	7	4		80314	RNA polymerase-associated protein RTF1 homolog OS=Homo sapiens OX=9606 GN=RTF1 PE=1 SV=4
996	1939	tr|A0A2R8Y6I6|A0A2R8Y6I6_HUMAN	107.29	9	0	0	7	4			2170000	2700000	5	5	0	0	6	2		81599	Dual-specificity tyrosine-phosphorylation-regulated kinase 1A OS=Homo sapiens OX=9606 GN=DYRK1A PE=1 SV=1
996	1940	sp|Q13627|DYR1A_HUMAN	107.29	9	0	0	7	4			2170000	2700000	5	5	0	0	6	2		85584	Dual specificity tyrosine-phosphorylation-regulated kinase 1A OS=Homo sapiens OX=9606 GN=DYRK1A PE=1 SV=2
996	1950	tr|A0A2R8YDF3|A0A2R8YDF3_HUMAN	107.29	13	0	0	10	6			2170000	2700000	5	5	0	0	6	2		59538	Dual-specificity tyrosine-phosphorylation-regulated kinase 1A (Fragment) OS=Homo sapiens OX=9606 GN=DYRK1A PE=1 SV=1
996	1953	tr|A0A2R8Y6L5|A0A2R8Y6L5_HUMAN	107.29	11	0	0	8	5			2170000	2700000	5	5	0	0	6	2		68490	Dual-specificity tyrosine-phosphorylation-regulated kinase 1A (Fragment) OS=Homo sapiens OX=9606 GN=DYRK1A PE=1 SV=1
609	1757	sp|Q02878|RL6_HUMAN	107.21	24	24	6	14	17	1260000	229000	1400000	1300000	6	6	8	4	5	6	Deamidation (NQ)	32728	60S ribosomal protein L6 OS=Homo sapiens OX=9606 GN=RPL6 PE=1 SV=3
489	3208	sp|Q6DRA6|H2B2D_HUMAN	107.2	23	23	15	6	6	152000	96200			4	1	9	7	7	5	Oxidation (M)	18018	Putative histone H2B type 2-D OS=Homo sapiens OX=9606 GN=HIST2H2BD PE=5 SV=3
489	3209	sp|Q6DN03|H2B2C_HUMAN	107.2	20	20	13	5	5	152000	96200			4	1	9	7	7	5	Oxidation (M)	21472	Putative histone H2B type 2-C OS=Homo sapiens OX=9606 GN=HIST2H2BC PE=5 SV=3
1035	2642	sp|Q8IUR7|ARMC8_HUMAN	107.19	7	0	0	5	7			1580000	3660000	4	4	0	0	3	4		75509	Armadillo repeat-containing protein 8 OS=Homo sapiens OX=9606 GN=ARMC8 PE=1 SV=2
1035	2646	tr|B7Z637|B7Z637_HUMAN	107.19	7	0	0	5	7			1580000	3660000	4	4	0	0	3	4		67186	Armadillo repeat containing 8 isoform CRA_g OS=Homo sapiens OX=9606 GN=ARMC8 PE=1 SV=1
963	2268	sp|Q8N8D1|PDCD7_HUMAN	107	12	0	0	12	8			4070000	1950000	4	4	0	0	7	3		54700	Programmed cell death protein 7 OS=Homo sapiens OX=9606 GN=PDCD7 PE=1 SV=1
918	1948	sp|Q12768|WASC5_HUMAN	106.27	6	0	0	5	4			512000	209000	7	6	0	0	6	6		134286	WASH complex subunit 5 OS=Homo sapiens OX=9606 GN=WASHC5 PE=1 SV=1
660	1502	sp|A6NKT7|RGPD3_HUMAN	106.17	7	0	0	6	4			18300		12	1	1	0	12	10		197486	RanBP2-like and GRIP domain-containing protein 3 OS=Homo sapiens OX=9606 GN=RGPD3 PE=3 SV=2
660	1503	tr|J3KNE0|J3KNE0_HUMAN	106.17	7	0	0	6	4			18300		12	1	1	0	12	10		197621	RanBP2-like and GRIP domain-containing protein 3 OS=Homo sapiens OX=9606 GN=RGPD3 PE=4 SV=2
879	2596	sp|P00558|PGK1_HUMAN	106.09	18	15	10	7	4	3090000	826000	244000	218000	6	6	6	3	2	1	Oxidation (M)	44615	Phosphoglycerate kinase 1 OS=Homo sapiens OX=9606 GN=PGK1 PE=1 SV=3
995	2393	sp|Q9Y2I8|WDR37_HUMAN	105.68	13	0	0	11	10			7150000	6300000	7	7	0	0	6	5	Deamidation (NQ)	54665	WD repeat-containing protein 37 OS=Homo sapiens OX=9606 GN=WDR37 PE=1 SV=2
995	2395	tr|A0A3B3IT47|A0A3B3IT47_HUMAN	105.68	11	0	0	10	9			7150000	6300000	7	7	0	0	6	5	Deamidation (NQ)	63834	WD repeat-containing protein 37 OS=Homo sapiens OX=9606 GN=WDR37 PE=1 SV=1
736	2059	sp|P39023|RL3_HUMAN	105.07	15	11	4	9	5	1540000	292000	2590000	1070000	7	7	7	2	7	2	Carbamidomethylation	46109	60S ribosomal protein L3 OS=Homo sapiens OX=9606 GN=RPL3 PE=1 SV=2
1168	3430	sp|P22695|QCR2_HUMAN	104.94	13	6	9	0	0	145000	75400			4	4	3	3	0	0	Oxidation (M)	48443	Cytochrome b-c1 complex subunit 2 mitochondrial OS=Homo sapiens OX=9606 GN=UQCRC2 PE=1 SV=3
890	1535	sp|Q9BWU1|CDK19_HUMAN	104.37	16	0	0	13	11			3240000	7380000	7	7	0	0	7	5	Carbamidomethylation; Oxidation (M)	56802	Cyclin-dependent kinase 19 OS=Homo sapiens OX=9606 GN=CDK19 PE=1 SV=1
953	2263	sp|P05771|KPCB_HUMAN	104.36	8	0	0	6	5			1270000	1320000	6	6	0	0	4	4	Acetylation (Protein N-term)	76869	Protein kinase C beta type OS=Homo sapiens OX=9606 GN=PRKCB PE=1 SV=4
892	2462	sp|P31151|S10A7_HUMAN	104.3	43	22	22	11	43	351000	168000	74700	3250000	7	7	2	2	1	8	Carbamidomethylation; Acetylation (Protein N-term); Oxidation (M)	11471	Protein S100-A7 OS=Homo sapiens OX=9606 GN=S100A7 PE=1 SV=4
791	2229	sp|P25311|ZA2G_HUMAN	104.22	20	17	15	3	3	565000	422000	641000	536000	5	5	6	5	1	1	Carbamidomethylation	34259	Zinc-alpha-2-glycoprotein OS=Homo sapiens OX=9606 GN=AZGP1 PE=1 SV=2
751	1838	sp|O94973|AP2A2_HUMAN	104.03	7	0	0	6	5			167000		7	1	0	0	9	7	Carbamidomethylation	103960	AP-2 complex subunit alpha-2 OS=Homo sapiens OX=9606 GN=AP2A2 PE=1 SV=2
989	2139	sp|O95347|SMC2_HUMAN	104.02	6	0	0	6	1			1400000	47400	7	7	0	0	9	1		135656	Structural maintenance of chromosomes protein 2 OS=Homo sapiens OX=9606 GN=SMC2 PE=1 SV=2
738	1520	sp|Q8IWA0|WDR75_HUMAN	103.92	11	0	0	10	8			4060000	901000	10	10	0	0	9	7	Acetylation (Protein N-term); Oxidation (M)	94499	WD repeat-containing protein 75 OS=Homo sapiens OX=9606 GN=WDR75 PE=1 SV=1
1086	2491	tr|A0A0A0MR02|A0A0A0MR02_HUMAN	103.84	23	19	4	7	4	1390000	92300	0	85700	6	6	4	1	2	2		30348	Voltage-dependent anion-selective channel protein 2 (Fragment) OS=Homo sapiens OX=9606 GN=VDAC2 PE=1 SV=1
1086	2492	sp|P45880|VDAC2_HUMAN	103.84	22	18	3	7	4	1390000	92300	0	85700	6	6	4	1	2	2		31567	Voltage-dependent anion-selective channel protein 2 OS=Homo sapiens OX=9606 GN=VDAC2 PE=1 SV=2
764	5506	sp|P05204|HMGN2_HUMAN	103.61	17	17	17	17	17	3190000	1480000	3150000	2990000	2	2	7	4	3	1		9393	Non-histone chromosomal protein HMG-17 OS=Homo sapiens OX=9606 GN=HMGN2 PE=1 SV=3
889	1824	sp|Q3KQU3|MA7D1_HUMAN	103.4	11	0	0	11	5			3800000	2130000	7	7	0	0	7	6	Carbamidomethylation	92820	MAP7 domain-containing protein 1 OS=Homo sapiens OX=9606 GN=MAP7D1 PE=1 SV=1
1052	2126	sp|Q09666|AHNK_HUMAN	103.37	2	0	0	1	1			1180000	582000	7	7	0	0	6	3		629114	Neuroblast differentiation-associated protein AHNAK OS=Homo sapiens OX=9606 GN=AHNAK PE=1 SV=2
857	1873	tr|E9PCS8|E9PCS8_HUMAN	103.31	12	0	0	11	12					6	0	0	0	5	7		44485	Metastasis-associated protein MTA3 OS=Homo sapiens OX=9606 GN=MTA3 PE=1 SV=1
857	1900	tr|E7EQY4|E7EQY4_HUMAN	103.31	10	0	0	8	10					6	0	0	0	5	7		58727	Metastasis-associated protein MTA3 OS=Homo sapiens OX=9606 GN=MTA3 PE=1 SV=1
857	1929	tr|E7EV10|E7EV10_HUMAN	103.31	8	0	0	7	8					6	0	0	0	5	7		67196	Metastasis-associated protein MTA3 OS=Homo sapiens OX=9606 GN=MTA3 PE=1 SV=1
857	1930	sp|Q9BTC8|MTA3_HUMAN	103.31	8	0	0	7	8					6	0	0	0	5	7		67504	Metastasis-associated protein MTA3 OS=Homo sapiens OX=9606 GN=MTA3 PE=1 SV=2
534	2355	sp|P01782|HV309_HUMAN	103.24	28	28	28	0	0	1790000	2740000			6	1	15	17	0	0	Carbamidomethylation; Oxidation (M); Deamidation (NQ)	12945	Immunoglobulin heavy variable 3-9 OS=Homo sapiens OX=9606 GN=IGHV3-9 PE=1 SV=2
818	1849	sp|Q8NF99|ZN397_HUMAN	102.98	14	0	0	14	4			2970000	358000	7	6	0	0	10	4	Carbamidomethylation	61139	Zinc finger protein 397 OS=Homo sapiens OX=9606 GN=ZNF397 PE=1 SV=2
796	1593	sp|Q9H2K8|TAOK3_HUMAN	102.91	12	0	0	9	11			2790000	1560000	9	8	0	0	8	8		105406	Serine/threonine-protein kinase TAO3 OS=Homo sapiens OX=9606 GN=TAOK3 PE=1 SV=2
860	2664	tr|C9K0U8|C9K0U8_HUMAN	102.63	36	29	26	12	29	158000	288000	285000	553000	4	4	4	4	1	3		14131	Single-stranded DNA-binding protein mitochondrial (Fragment) OS=Homo sapiens OX=9606 GN=SSBP1 PE=1 SV=1
860	2665	tr|A0A0G2JLD8|A0A0G2JLD8_HUMAN	102.63	32	26	23	11	26	158000	288000	285000	553000	4	4	4	4	1	3		15598	Single-stranded DNA-binding protein mitochondrial (Fragment) OS=Homo sapiens OX=9606 GN=SSBP1 PE=1 SV=1
860	2666	tr|E7EUY5|E7EUY5_HUMAN	102.63	32	26	23	11	26	158000	288000	285000	553000	4	4	4	4	1	3		15713	Single-stranded DNA-binding protein mitochondrial (Fragment) OS=Homo sapiens OX=9606 GN=SSBP1 PE=1 SV=1
860	2667	sp|Q04837|SSBP_HUMAN	102.63	29	24	21	10	24	158000	288000	285000	553000	4	4	4	4	1	3		17260	Single-stranded DNA-binding protein mitochondrial OS=Homo sapiens OX=9606 GN=SSBP1 PE=1 SV=1
938	1702	sp|P55884|EIF3B_HUMAN	102.6	8	0	0	8	3			1500000	474000	6	6	0	0	8	2	Carbamidomethylation; Oxidation (M)	92482	Eukaryotic translation initiation factor 3 subunit B OS=Homo sapiens OX=9606 GN=EIF3B PE=1 SV=3
900	2035	sp|Q9Y4W2|LAS1L_HUMAN	102.41	8	0	0	8	8			1400000	1130000	5	5	0	0	6	6	Carbamidomethylation	83065	Ribosomal biogenesis protein LAS1L OS=Homo sapiens OX=9606 GN=LAS1L PE=1 SV=2
684	4149	sp|P0DP07|HV431_HUMAN	102.37	33	33	20	0	0	2090000	2840000			9	5	12	9	0	0	Carbamidomethylation	13095	Immunoglobulin heavy variable 4-31 OS=Homo sapiens OX=9606 GN=IGHV4-31 PE=3 SV=1
684	4150	sp|P0DP06|HVD34_HUMAN	102.37	33	33	20	0	0	2090000	2840000			9	5	12	9	0	0	Carbamidomethylation	13156	Immunoglobulin heavy variable 4-30-4 OS=Homo sapiens OX=9606 GN=IGHV4-30-4 PE=3 SV=1
684	4151	sp|P01824|HV439_HUMAN	102.37	31	31	19	0	0	2090000	2840000			9	5	12	9	0	0	Carbamidomethylation	13917	Immunoglobulin heavy variable 4-39 OS=Homo sapiens OX=9606 GN=IGHV4-39 PE=1 SV=2
912	2753	sp|Q09161|NCBP1_HUMAN	102.35	4	0	0	4	4			3080000	3030000	3	3	0	0	3	6	Deamidation (NQ)	91839	Nuclear cap-binding protein subunit 1 OS=Homo sapiens OX=9606 GN=NCBP1 PE=1 SV=1
1117	2237	sp|Q8NF37|PCAT1_HUMAN	102.22	9	0	0	9	3			2910000	473000	5	5	0	0	5	2	Carbamidomethylation	59151	Lysophosphatidylcholine acyltransferase 1 OS=Homo sapiens OX=9606 GN=LPCAT1 PE=1 SV=2
1117	2379	tr|A0A0G2JQ62|A0A0G2JQ62_HUMAN	102.22	8	0	0	8	4			2370000	473000	4	4	0	0	4	2	Carbamidomethylation	54473	Lysophosphatidylcholine acyltransferase 1 (Fragment) OS=Homo sapiens OX=9606 GN=LPCAT1 PE=1 SV=1
1004	1827	sp|P35237|SPB6_HUMAN	102.11	22	0	0	11	18			1400000	2160000	6	6	0	0	3	6	Carbamidomethylation; Oxidation (M)	42622	Serpin B6 OS=Homo sapiens OX=9606 GN=SERPINB6 PE=1 SV=3
1004	1828	tr|A0A024QZX5|A0A024QZX5_HUMAN	102.11	21	0	0	11	17			1400000	2160000	6	6	0	0	3	6	Carbamidomethylation; Oxidation (M)	43024	Serpin B6 OS=Homo sapiens OX=9606 GN=SERPINB6 PE=1 SV=1
1004	1832	tr|A0A2R8YD12|A0A2R8YD12_HUMAN	102.11	24	0	0	12	20			1400000	2160000	6	6	0	0	3	6	Carbamidomethylation; Oxidation (M)	38125	Serpin B6 OS=Homo sapiens OX=9606 GN=SERPINB6 PE=1 SV=1
1004	1833	tr|A0A087X1N8|A0A087X1N8_HUMAN	102.11	21	0	0	10	17			1400000	2160000	6	6	0	0	3	6	Carbamidomethylation; Oxidation (M)	44822	Serpin B6 OS=Homo sapiens OX=9606 GN=SERPINB6 PE=1 SV=1
1004	1963	tr|A0A2R8Y6A7|A0A2R8Y6A7_HUMAN	102.11	40	0	0	23	32			1400000	1910000	5	5	0	0	3	4	Carbamidomethylation	19658	Serpin B6 (Fragment) OS=Homo sapiens OX=9606 GN=SERPINB6 PE=1 SV=1
1013	2612	sp|Q9H269|VPS16_HUMAN	102.1	8	0	3	5	5		333000	2300000	697000	6	6	0	1	5	5	Carbamidomethylation; Deamidation (NQ)	94694	Vacuolar protein sorting-associated protein 16 homolog OS=Homo sapiens OX=9606 GN=VPS16 PE=1 SV=2
939	1748	sp|Q96L92|SNX27_HUMAN	101.84	16	0	0	10	14			1890000	2840000	8	8	0	0	5	7	Acetylation (Protein N-term); Deamidation (NQ)	61265	Sorting nexin-27 OS=Homo sapiens OX=9606 GN=SNX27 PE=1 SV=2
935	2208	sp|Q14562|DHX8_HUMAN	101.74	5	0	0	5	4			1450000	438000	5	5	0	0	5	4		139314	ATP-dependent RNA helicase DHX8 OS=Homo sapiens OX=9606 GN=DHX8 PE=1 SV=1
935	2210	tr|F5H658|F5H658_HUMAN	101.74	5	0	0	5	4			1450000	438000	5	5	0	0	5	4		134001	ATP-dependent RNA helicase DHX8 OS=Homo sapiens OX=9606 GN=DHX8 PE=1 SV=1
1276	3777	sp|Q9NZN8|CNOT2_HUMAN	101.63	5	0	0	5	5			2860000	2520000	2	2	0	0	2	2		59738	CCR4-NOT transcription complex subunit 2 OS=Homo sapiens OX=9606 GN=CNOT2 PE=1 SV=1
1276	3778	tr|F8VUB4|F8VUB4_HUMAN	101.63	5	0	0	5	5			2860000	2520000	2	2	0	0	2	2		57419	CCR4-NOT transcription complex subunit 2 OS=Homo sapiens OX=9606 GN=CNOT2 PE=1 SV=2
1276	3779	tr|F8VV52|F8VV52_HUMAN	101.63	5	0	0	5	5			2860000	2520000	2	2	0	0	2	2		58621	CCR4-NOT transcription complex subunit 2 (Fragment) OS=Homo sapiens OX=9606 GN=CNOT2 PE=1 SV=1
1276	4201	tr|F8VRS8|F8VRS8_HUMAN	101.63	9	0	0	9	9			2860000	2520000	2	2	0	0	2	2		29925	CCR4-NOT transcription complex subunit 2 (Fragment) OS=Homo sapiens OX=9606 GN=CNOT2 PE=1 SV=1
1276	4202	tr|F8W145|F8W145_HUMAN	101.63	8	0	0	8	8			2860000	2520000	2	2	0	0	2	2		33266	CCR4-NOT transcription complex subunit 2 (Fragment) OS=Homo sapiens OX=9606 GN=CNOT2 PE=1 SV=1
608	2141	sp|O00148|DX39A_HUMAN	101.62	17	8	7	9	15	860000	767000	2330000	2830000	7	7	3	3	8	9		49130	ATP-dependent RNA helicase DDX39A OS=Homo sapiens OX=9606 GN=DDX39A PE=1 SV=2
875	1635	tr|E9PDF6|E9PDF6_HUMAN	101.38	8	0	0	7	5			1400000	250000	9	8	0	0	8	5		128481	Unconventional myosin-Ib OS=Homo sapiens OX=9606 GN=MYO1B PE=1 SV=1
875	1636	sp|O43795|MYO1B_HUMAN	101.38	8	0	0	7	5			1400000	250000	9	8	0	0	8	5		131985	Unconventional myosin-Ib OS=Homo sapiens OX=9606 GN=MYO1B PE=1 SV=3
1315	3592	sp|Q5BKZ1|ZN326_HUMAN	101.35	6	0	0	3	6			1540000	2090000	3	3	0	0	1	3		65654	DBIRD complex subunit ZNF326 OS=Homo sapiens OX=9606 GN=ZNF326 PE=1 SV=2
849	1626	tr|Q5JR04|Q5JR04_HUMAN	101.34	10	0	0	5	7			682000	1240000	9	9	0	0	5	8		107210	Helicase MOV-10 OS=Homo sapiens OX=9606 GN=MOV10 PE=1 SV=1
849	1627	sp|Q9HCE1|MOV10_HUMAN	101.34	10	0	0	4	7			682000	1240000	9	9	0	0	5	8		113671	Helicase MOV-10 OS=Homo sapiens OX=9606 GN=MOV10 PE=1 SV=2
1018	2701	sp|O14744|ANM5_HUMAN	101.34	12	4	0	2	8	106000		59700	2320000	8	8	2	0	1	8	Carbamidomethylation; Acetylation (Protein N-term)	72684	Protein arginine N-methyltransferase 5 OS=Homo sapiens OX=9606 GN=PRMT5 PE=1 SV=4
485	3934	sp|P12036|NFH_HUMAN	101.29	2	2	2	2	2					3	0	6	6	8	9	Carbamidomethylation; Deamidation (NQ)	112479	Neurofilament heavy polypeptide OS=Homo sapiens OX=9606 GN=NEFH PE=1 SV=4
964	2536	sp|Q8TCJ2|STT3B_HUMAN	101.22	6	0	0	4	5			1640000	1240000	7	6	0	0	5	8		93674	Dolichyl-diphosphooligosaccharide--protein glycosyltransferase subunit STT3B OS=Homo sapiens OX=9606 GN=STT3B PE=1 SV=1
708	1643	sp|P78332|RBM6_HUMAN	101.2	9	1	1	8	4			2000000	1020000	11	9	3	3	10	7		128644	RNA-binding protein 6 OS=Homo sapiens OX=9606 GN=RBM6 PE=1 SV=5
834	1837	sp|Q13492|PICAL_HUMAN	101.18	9	0	0	9	6			2910000	2430000	6	6	0	0	9	5	Deamidation (NQ)	70755	Phosphatidylinositol-binding clathrin assembly protein OS=Homo sapiens OX=9606 GN=PICALM PE=1 SV=2
758	1652	sp|Q9Y3T9|NOC2L_HUMAN	101.16	10	0	0	10	7			2320000	1940000	7	7	0	0	11	6		84919	Nucleolar complex protein 2 homolog OS=Homo sapiens OX=9606 GN=NOC2L PE=1 SV=4
869	1483	sp|O75369|FLNB_HUMAN	101.04	4	0	0	4	1			478000	232000	12	7	0	0	10	3	Oxidation (M)	278162	Filamin-B OS=Homo sapiens OX=9606 GN=FLNB PE=1 SV=2
919	2287	sp|Q13823|NOG2_HUMAN	100.89	10	0	0	10	4			1780000	348000	7	7	0	0	7	2		83655	Nucleolar GTP-binding protein 2 OS=Homo sapiens OX=9606 GN=GNL2 PE=1 SV=1
870	1442	sp|P55072|TERA_HUMAN	100.84	13	0	0	12	6			44400000	53600000	10	10	0	0	11	5	Carbamidomethylation; Acetylation (Protein N-term); Oxidation (M)	89322	Transitional endoplasmic reticulum ATPase OS=Homo sapiens OX=9606 GN=VCP PE=1 SV=4
883	2105	sp|A5YKK6|CNOT1_HUMAN	100.81	3	0	0	2	2			761000	237000	6	6	0	0	6	5		266937	CCR4-NOT transcription complex subunit 1 OS=Homo sapiens OX=9606 GN=CNOT1 PE=1 SV=2
1140	2694	sp|Q9NQ55|SSF1_HUMAN	100.79	10	0	0	7	10			1500000	1690000	4	4	0	0	3	4		53194	Suppressor of SWI4 1 homolog OS=Homo sapiens OX=9606 GN=PPAN PE=2 SV=1
1140	2729	tr|A0A0A6YYI3|A0A0A6YYI3_HUMAN	100.79	9	0	0	7	9			1500000	1690000	4	4	0	0	3	4		58199	Protein PPAN-P2RY11 OS=Homo sapiens OX=9606 GN=PPAN-P2RY11 PE=4 SV=1
1140	2760	tr|A0A0B4J1V8|A0A0B4J1V8_HUMAN	100.79	6	0	0	4	6			1500000	1690000	4	4	0	0	3	4		87918	HCG2039996 OS=Homo sapiens OX=9606 GN=PPAN-P2RY11 PE=3 SV=1
827	2070	sp|Q01813|PFKAP_HUMAN	100.71	11	5	0	6	6	15900		1110000	744000	8	6	3	0	6	7	Oxidation (M)	85596	ATP-dependent 6-phosphofructokinase platelet type OS=Homo sapiens OX=9606 GN=PFKP PE=1 SV=2
901	2553	tr|J3QSH4|J3QSH4_HUMAN	100.57	8	0	0	8	4			7140000	2140000	4	4	0	0	7	4	Carbamidomethylation	55794	Vascular endothelial zinc finger 1 OS=Homo sapiens OX=9606 GN=VEZF1 PE=1 SV=1
901	2555	sp|Q14119|VEZF1_HUMAN	100.57	8	0	0	8	4			7140000	2140000	4	4	0	0	7	4	Carbamidomethylation	56931	Vascular endothelial zinc finger 1 OS=Homo sapiens OX=9606 GN=VEZF1 PE=1 SV=2
1074	2188	sp|Q6NW34|NEPRO_HUMAN	100.32	10	0	0	8	4			2200000	941000	5	5	0	0	4	2		64552	Nucleolus and neural progenitor protein OS=Homo sapiens OX=9606 GN=NEPRO PE=1 SV=3
884	2213	sp|P48735|IDHP_HUMAN	100.25	10	8	8	2	0	1050000	799000	125000		5	5	5	6	1	0	Oxidation (M)	50909	Isocitrate dehydrogenase [NADP] mitochondrial OS=Homo sapiens OX=9606 GN=IDH2 PE=1 SV=2
904	2081	tr|H0Y9Z5|H0Y9Z5_HUMAN	100.18	9	0	0	9	9			3350000	2340000	5	5	0	0	5	5		62431	CCR4-NOT transcription complex subunit 6-like OS=Homo sapiens OX=9606 GN=CNOT6L PE=1 SV=2
904	2082	sp|Q96LI5|CNO6L_HUMAN	100.18	8	0	0	8	8			3350000	2340000	5	5	0	0	5	5		63002	CCR4-NOT transcription complex subunit 6-like OS=Homo sapiens OX=9606 GN=CNOT6L PE=1 SV=2
643	3716	sp|P01742|HV169_HUMAN	100.16	25	24	24	13	13	961000	983000			6	2	13	10	1	1	Carbamidomethylation	12659	Immunoglobulin heavy variable 1-69 OS=Homo sapiens OX=9606 GN=IGHV1-69 PE=1 SV=2
1131	2149	tr|H0Y4W2|H0Y4W2_HUMAN	100.08	2	0	0	1	1			880000	84300	7	6	0	0	5	3		405921	Transformation/transcription domain-associated protein (Fragment) OS=Homo sapiens OX=9606 GN=TRRAP PE=1 SV=1
1131	2151	tr|F2Z2U4|F2Z2U4_HUMAN	100.08	2	0	0	1	1			880000	84300	7	6	0	0	5	3		436141	Transformation/transcription domain-associated protein OS=Homo sapiens OX=9606 GN=TRRAP PE=1 SV=3
1131	2152	sp|Q9Y4A5|TRRAP_HUMAN	100.08	2	0	0	1	1			880000	84300	7	6	0	0	5	3		437603	Transformation/transcription domain-associated protein OS=Homo sapiens OX=9606 GN=TRRAP PE=1 SV=3
582	1896	tr|A0A087WWU8|A0A087WWU8_HUMAN	99.84	39	21	13	27	21	81700		2990000	2460000	10	5	5	3	9	13	Acetylation (Protein N-term)	26421	Tropomyosin alpha-3 chain OS=Homo sapiens OX=9606 GN=TPM3 PE=1 SV=1
1019	1993	sp|Q8IXH7|NELFD_HUMAN	99.7	12	1	1	11	7	61000	50900	2390000	519000	6	6	1	1	5	3	Deamidation (NQ)	66247	Negative elongation factor C/D OS=Homo sapiens OX=9606 GN=NELFCD PE=1 SV=2
1019	1994	tr|X6RLT1|X6RLT1_HUMAN	99.7	12	1	1	10	7	61000	50900	2390000	519000	6	6	1	1	5	3	Deamidation (NQ)	66552	Negative elongation factor C/D (Fragment) OS=Homo sapiens OX=9606 GN=NELFCD PE=1 SV=1
1019	1995	tr|H0UI80|H0UI80_HUMAN	99.7	12	1	1	10	7	61000	50900	2390000	519000	6	6	1	1	5	3	Deamidation (NQ)	67347	Negative elongation factor C/D OS=Homo sapiens OX=9606 GN=NELFCD PE=1 SV=1
787	1717	sp|O43592|XPOT_HUMAN	99.48	7	0	0	6	5			3350000	1160000	7	7	0	0	7	6	Carbamidomethylation	109964	Exportin-T OS=Homo sapiens OX=9606 GN=XPOT PE=1 SV=2
670	1775	sp|P67936|TPM4_HUMAN	99.34	34	17	12	19	26			251000	345000	10	4	5	3	6	10	Acetylation (Protein N-term)	28522	Tropomyosin alpha-4 chain OS=Homo sapiens OX=9606 GN=TPM4 PE=1 SV=3
1006	1712	tr|A0A2R8Y611|A0A2R8Y611_HUMAN	99.06	8	0	0	5	4			1790000	2030000	7	7	0	0	5	4	Carbamidomethylation; Oxidation (M)	106195	AP-3 complex subunit delta-1 (Fragment) OS=Homo sapiens OX=9606 GN=AP3D1 PE=1 SV=1
1006	1719	sp|O14617|AP3D1_HUMAN	99.06	6	0	0	4	4			1790000	2030000	7	7	0	0	5	4	Carbamidomethylation; Oxidation (M)	130158	AP-3 complex subunit delta-1 OS=Homo sapiens OX=9606 GN=AP3D1 PE=1 SV=1
833	2367	sp|Q9BSJ2|GCP2_HUMAN	98.99	7	1	0	5	5			722000	1270000	6	5	1	0	5	8	Oxidation (M)	102534	Gamma-tubulin complex component 2 OS=Homo sapiens OX=9606 GN=TUBGCP2 PE=1 SV=2
899	2648	sp|P34896|GLYC_HUMAN	98.86	13	13	7	0	0	1350000	109000			6	6	7	3	0	0	Oxidation (M); Deamidation (NQ)	53083	Serine hydroxymethyltransferase cytosolic OS=Homo sapiens OX=9606 GN=SHMT1 PE=1 SV=1
929	1920	sp|Q14145|KEAP1_HUMAN	98.79	10	0	0	7	8			2480000	3190000	6	6	0	0	4	6		69666	Kelch-like ECH-associated protein 1 OS=Homo sapiens OX=9606 GN=KEAP1 PE=1 SV=2
1047	3084	sp|Q08380|LG3BP_HUMAN	98.75	8	0	0	5	8			598000	2320000	4	4	0	0	2	5		65331	Galectin-3-binding protein OS=Homo sapiens OX=9606 GN=LGALS3BP PE=1 SV=1
874	2102	sp|P20585|MSH3_HUMAN	98.55	6	0	0	5	4			691000	362000	7	7	0	0	7	5	Carbamidomethylation	127412	DNA mismatch repair protein Msh3 OS=Homo sapiens OX=9606 GN=MSH3 PE=1 SV=4
807	1619	sp|P11274|BCR_HUMAN	98.24	8	2	0	6	3	183000		2080000	518000	10	9	2	0	9	3		142819	Breakpoint cluster region protein OS=Homo sapiens OX=9606 GN=BCR PE=1 SV=2
934	2184	sp|Q9UPP1|PHF8_HUMAN	98.16	6	0	0	4	6			469000	670000	6	4	0	0	5	9	Deamidation (NQ)	117864	Histone lysine demethylase PHF8 OS=Homo sapiens OX=9606 GN=PHF8 PE=1 SV=3
927	2989	sp|Q12800|TFCP2_HUMAN	98.12	9	0	0	9	9			1040000	3800000	3	3	0	0	3	6	Carbamidomethylation; Deamidation (NQ)	57256	Alpha-globin transcription factor CP2 OS=Homo sapiens OX=9606 GN=TFCP2 PE=1 SV=2
566	2495	sp|A0A0C4DH32|HV320_HUMAN	98.12	25	25	25	0	0	1310000	1510000			6	1	15	14	0	0	Oxidation (M); Deamidation (NQ)	12673	Immunoglobulin heavy variable 3-20 OS=Homo sapiens OX=9606 GN=IGHV3-20 PE=3 SV=2
696	2766	sp|P52597|HNRPF_HUMAN	97.3	13	7	11	6	6	228000	690000	274000	305000	5	4	6	7	3	6	Acetylation (Protein N-term); Oxidation (M)	45672	Heterogeneous nuclear ribonucleoprotein F OS=Homo sapiens OX=9606 GN=HNRNPF PE=1 SV=3
768	1786	sp|Q12873|CHD3_HUMAN	97.27	4	0	0	3	4			7710000	4330000	8	3	0	0	8	7	Oxidation (M)	226590	Chromodomain-helicase-DNA-binding protein 3 OS=Homo sapiens OX=9606 GN=CHD3 PE=1 SV=3
776	1848	sp|Q86UT6|NLRX1_HUMAN	97.22	9	0	0	7	5			2230000	1650000	9	9	0	0	12	8	Carbamidomethylation	107616	NLR family member X1 OS=Homo sapiens OX=9606 GN=NLRX1 PE=1 SV=1
647	4342	sp|P01743|HV146_HUMAN	97.1	26	25	25	13	13	3230000	2580000			5	1	12	10	1	1	Carbamidomethylation; Oxidation (M)	12933	Immunoglobulin heavy variable 1-46 OS=Homo sapiens OX=9606 GN=IGHV1-46 PE=1 SV=2
1201	2962	sp|Q53EL6|PDCD4_HUMAN	96.81	8	0	0	8	5			1640000	1150000	3	3	0	0	3	2		51735	Programmed cell death protein 4 OS=Homo sapiens OX=9606 GN=PDCD4 PE=1 SV=2
819	2150	sp|Q9Y490|TLN1_HUMAN	96.74	4	0	0	3	1			1090000	806000	8	8	0	0	9	4	Deamidation (NQ)	269765	Talin-1 OS=Homo sapiens OX=9606 GN=TLN1 PE=1 SV=3
850	4714	sp|P17096|HMGA1_HUMAN	96.65	23	23	15	23	23	648000	279000	1090000	1150000	2	2	4	2	5	1	Deamidation (NQ)	11676	High mobility group protein HMG-I/HMG-Y OS=Homo sapiens OX=9606 GN=HMGA1 PE=1 SV=3
683	2539	tr|A0A0C4DFX7|A0A0C4DFX7_HUMAN	96.62	7	0	0	7	6			2190000	2790000	4	4	0	0	10	13		62554	WD repeat-containing protein 76 OS=Homo sapiens OX=9606 GN=WDR76 PE=1 SV=1
683	2549	sp|Q9H967|WDR76_HUMAN	96.62	6	0	0	6	5			2190000	2790000	4	4	0	0	10	13		69769	WD repeat-containing protein 76 OS=Homo sapiens OX=9606 GN=WDR76 PE=1 SV=2
913	1561	sp|Q13200|PSMD2_HUMAN	96.53	11	0	1	8	3		0	2210000	1120000	9	9	0	1	7	2	Carbamidomethylation	100200	26S proteasome non-ATPase regulatory subunit 2 OS=Homo sapiens OX=9606 GN=PSMD2 PE=1 SV=3
1293	2623	sp|Q9Y265|RUVB1_HUMAN	96.48	11	6	0	5	0	53600		318000		4	4	2	0	2	0		50228	RuvB-like 1 OS=Homo sapiens OX=9606 GN=RUVBL1 PE=1 SV=1
1154	2521	tr|A0A087WVM4|A0A087WVM4_HUMAN	96.29	7	1	0	5	3	77600		533000	113000	6	5	1	0	4	4	Deamidation (NQ)	99312	Monofunctional C1-tetrahydrofolate synthase mitochondrial OS=Homo sapiens OX=9606 GN=MTHFD1L PE=1 SV=1
1154	2522	sp|Q6UB35|C1TM_HUMAN	96.29	6	1	0	4	3	77600		533000	113000	6	5	1	0	4	4	Deamidation (NQ)	105790	Monofunctional C1-tetrahydrofolate synthase mitochondrial OS=Homo sapiens OX=9606 GN=MTHFD1L PE=1 SV=1
1154	2524	tr|B7ZM99|B7ZM99_HUMAN	96.29	6	1	0	4	3	77600		533000	113000	6	5	1	0	4	4	Deamidation (NQ)	105889	MTHFD1L protein OS=Homo sapiens OX=9606 GN=MTHFD1L PE=1 SV=1
585	1776	sp|P29508|SPB3_HUMAN	96.24	18	11	10	7	14	168000	657000	1030000	2040000	10	9	6	7	4	11	Acetylation (Protein N-term); Oxidation (M)	44565	Serpin B3 OS=Homo sapiens OX=9606 GN=SERPINB3 PE=1 SV=2
931	2305	sp|Q96JJ7|TMX3_HUMAN	96.18	11	0	0	11	8			3020000	2570000	5	5	0	0	5	5	Oxidation (M)	51872	Protein disulfide-isomerase TMX3 OS=Homo sapiens OX=9606 GN=TMX3 PE=1 SV=2
610	2714	sp|A0A0A0MS15|HV349_HUMAN	96.15	24	24	24	0	0					5	0	9	13	0	0	Carbamidomethylation; Oxidation (M)	13056	Immunoglobulin heavy variable 3-49 OS=Homo sapiens OX=9606 GN=IGHV3-49 PE=3 SV=1
1105	3885	sp|Q5JQF8|PAP1M_HUMAN	96.12	10	6	0	10	10					2	0	1	0	3	3		22799	Polyadenylate-binding protein 1-like 2 OS=Homo sapiens OX=9606 GN=PABPC1L2A PE=2 SV=1
979	2064	sp|P35606|COPB2_HUMAN	95.93	6	0	0	5	5			540000	413000	5	5	0	0	4	4	Carbamidomethylation	102487	Coatomer subunit beta' OS=Homo sapiens OX=9606 GN=COPB2 PE=1 SV=2
887	1683	sp|Q9Y4L1|HYOU1_HUMAN	95.72	13	0	0	12	2			2080000	586000	11	11	0	0	9	4	Oxidation (M); Deamidation (NQ)	111335	Hypoxia up-regulated protein 1 OS=Homo sapiens OX=9606 GN=HYOU1 PE=1 SV=1
716	2160	sp|Q96AE4|FUBP1_HUMAN	95.62	10	0	0	7	10			406000	2170000	7	2	0	0	8	9	Oxidation (M)	67560	Far upstream element-binding protein 1 OS=Homo sapiens OX=9606 GN=FUBP1 PE=1 SV=3
716	2162	tr|E9PEB5|E9PEB5_HUMAN	95.62	9	0	0	7	9			406000	2170000	7	2	0	0	8	9	Oxidation (M)	68904	Far upstream element-binding protein 1 OS=Homo sapiens OX=9606 GN=FUBP1 PE=1 SV=1
783	1859	sp|P41212|ETV6_HUMAN	95.51	15	2	0	15	15	53200		6320000	9250000	7	7	1	0	7	9	Deamidation (NQ)	53000	Transcription factor ETV6 OS=Homo sapiens OX=9606 GN=ETV6 PE=1 SV=1
1161	3431	tr|A0A1W2PNW1|A0A1W2PNW1_HUMAN	95.26	5	0	0	4	5			436000	537000	3	3	0	0	2	6		76078	Signal transducer and activator of transcription OS=Homo sapiens OX=9606 GN=STAT6 PE=1 SV=1
1161	3434	sp|P42226|STAT6_HUMAN	95.26	4	0	0	3	4			436000	537000	3	3	0	0	2	6		94135	Signal transducer and activator of transcription 6 OS=Homo sapiens OX=9606 GN=STAT6 PE=1 SV=1
932	3057	sp|Q15532|SSXT_HUMAN	95.18	8	0	0	8	8			26600000	41300000	4	4	0	0	4	5	Acetylation (Protein N-term)	45929	Protein SSXT OS=Homo sapiens OX=9606 GN=SS18 PE=1 SV=3
997	2042	tr|A0A0C4DGA6|A0A0C4DGA6_HUMAN	95.14	6	0	0	6	3			2140000	498000	6	6	0	0	7	3		113857	Helicase-like transcription factor OS=Homo sapiens OX=9606 GN=HLTF PE=1 SV=1
997	2043	sp|Q14527|HLTF_HUMAN	95.14	6	0	0	6	3			2140000	498000	6	6	0	0	7	3		113928	Helicase-like transcription factor OS=Homo sapiens OX=9606 GN=HLTF PE=1 SV=2
739	2203	sp|Q15717|ELAV1_HUMAN	95.13	16	11	13	7	12	173000	154000	478000	1040000	5	5	3	4	4	5		36092	ELAV-like protein 1 OS=Homo sapiens OX=9606 GN=ELAVL1 PE=1 SV=2
705	4878	sp|A0A0C4DH29|HV103_HUMAN	94.97	26	12	25	13	13		287000			5	1	10	9	1	1	Carbamidomethylation; Oxidation (M)	13008	Immunoglobulin heavy variable 1-3 OS=Homo sapiens OX=9606 GN=IGHV1-3 PE=3 SV=1
840	1823	sp|P26358|DNMT1_HUMAN	94.97	5	0	0	3	3			707000	432000	8	8	0	0	8	5		183164	DNA (cytosine-5)-methyltransferase 1 OS=Homo sapiens OX=9606 GN=DNMT1 PE=1 SV=2
908	2199	tr|A0A3B3ISR7|A0A3B3ISR7_HUMAN	94.81	9	0	1	7	7		41900	754000	766000	5	5	0	1	5	6	Oxidation (M)	77799	RNA helicase OS=Homo sapiens OX=9606 GN=DDX10 PE=1 SV=1
908	2201	tr|E9PIF2|E9PIF2_HUMAN	94.81	7	0	1	6	6		41900	754000	766000	5	5	0	1	5	6	Oxidation (M)	96455	RNA helicase OS=Homo sapiens OX=9606 GN=DDX10 PE=1 SV=1
908	2202	sp|Q13206|DDX10_HUMAN	94.81	7	0	1	6	6		41900	754000	766000	5	5	0	1	5	6	Oxidation (M)	100888	Probable ATP-dependent RNA helicase DDX10 OS=Homo sapiens OX=9606 GN=DDX10 PE=1 SV=2
1328	3001	sp|P21796|VDAC1_HUMAN	94.8	14	14	0	0	0	388000				3	2	3	0	0	0		30773	Voltage-dependent anion-selective channel protein 1 OS=Homo sapiens OX=9606 GN=VDAC1 PE=1 SV=2
821	1872	sp|O75592|MYCB2_HUMAN	94.53	2	0	0	2	1			1600000	448000	11	11	0	0	10	4	Carbamidomethylation; Oxidation (M)	513643	E3 ubiquitin-protein ligase MYCBP2 OS=Homo sapiens OX=9606 GN=MYCBP2 PE=1 SV=4
1026	2031	sp|P56192|SYMC_HUMAN	94.46	7	0	0	6	3			1340000	910000	6	6	0	0	5	3		101116	Methionine--tRNA ligase cytoplasmic OS=Homo sapiens OX=9606 GN=MARS PE=1 SV=2
911	2146	sp|Q03701|CEBPZ_HUMAN	94.3	6	0	0	6	3			1370000	237000	6	6	0	0	8	3	Oxidation (M)	120974	CCAAT/enhancer-binding protein zeta OS=Homo sapiens OX=9606 GN=CEBPZ PE=1 SV=3
1118	2708	sp|P08651|NFIC_HUMAN	94.19	10	0	0	10	4			6030000	1100000	4	4	0	0	5	2		55675	Nuclear factor 1 C-type OS=Homo sapiens OX=9606 GN=NFIC PE=1 SV=2
1118	2709	tr|A0A286YEX4|A0A286YEX4_HUMAN	94.19	10	0	0	10	4			6030000	1100000	4	4	0	0	5	2		58204	Nuclear factor 1 OS=Homo sapiens OX=9606 GN=NFIC PE=1 SV=1
802	1965	tr|A0A140TA29|A0A140TA29_HUMAN	94.17	3	1	1	2	3	11300	63600	456000	558000	6	2	1	1	4	7		187665	Complement C4-B OS=Homo sapiens OX=9606 GN=C4B PE=1 SV=1
802	1966	tr|A0A0G2JL54|A0A0G2JL54_HUMAN	94.17	3	1	1	2	3	11300	63600	456000	558000	6	2	1	1	4	7		187715	Complement C4-B OS=Homo sapiens OX=9606 GN=C4B_2 PE=1 SV=1
802	1967	tr|F5GXS0|F5GXS0_HUMAN	94.17	3	1	1	2	3	11300	63600	456000	558000	6	2	1	1	4	7		187668	Complement C4-B OS=Homo sapiens OX=9606 GN=C4B PE=1 SV=1
802	1968	tr|A0A140TA32|A0A140TA32_HUMAN	94.17	3	1	1	2	3	11300	63600	456000	558000	6	2	1	1	4	7		187763	Complement C4-A OS=Homo sapiens OX=9606 GN=C4A PE=1 SV=1
802	1969	tr|A0A140TA49|A0A140TA49_HUMAN	94.17	3	1	1	2	3	11300	63600	456000	558000	6	2	1	1	4	7		187793	Complement C4-A OS=Homo sapiens OX=9606 GN=C4A PE=1 SV=1
802	1970	tr|A0A140TA44|A0A140TA44_HUMAN	94.17	3	1	1	2	3	11300	63600	456000	558000	6	2	1	1	4	7		187659	Complement C4-A OS=Homo sapiens OX=9606 GN=C4A PE=1 SV=1
802	1971	sp|P0C0L5|CO4B_HUMAN	94.17	3	1	1	2	3	11300	63600	456000	558000	6	2	1	1	4	7		192750	Complement C4-B OS=Homo sapiens OX=9606 GN=C4B PE=1 SV=2
802	1972	sp|P0C0L4|CO4A_HUMAN	94.17	3	1	1	2	3	11300	63600	456000	558000	6	2	1	1	4	7		192784	Complement C4-A OS=Homo sapiens OX=9606 GN=C4A PE=1 SV=2
802	1973	tr|A0A0G2JPR0|A0A0G2JPR0_HUMAN	94.17	3	1	1	2	3	11300	63600	456000	558000	6	2	1	1	4	7		192874	Complement C4-A OS=Homo sapiens OX=9606 GN=C4A PE=1 SV=1
1451	4726	sp|O95674|CDS2_HUMAN	93.87	6	0	0	6	4			1070000	170000	2	2	0	0	3	1		51418	Phosphatidate cytidylyltransferase 2 OS=Homo sapiens OX=9606 GN=CDS2 PE=1 SV=1
774	1850	sp|Q9H2U1|DHX36_HUMAN	93.77	7	0	0	7	6			1300000	363000	6	5	0	0	9	6	Carbamidomethylation	114760	ATP-dependent DNA/RNA helicase DHX36 OS=Homo sapiens OX=9606 GN=DHX36 PE=1 SV=2
853	1977	sp|O75400|PR40A_HUMAN	93.7	6	0	0	5	5			15500000	3340000	7	7	0	0	7	6		108805	Pre-mRNA-processing factor 40 homolog A OS=Homo sapiens OX=9606 GN=PRPF40A PE=1 SV=2
853	1978	tr|A0A3F2YNY6|A0A3F2YNY6_HUMAN	93.7	6	0	0	5	5			15500000	3340000	7	7	0	0	7	6		112405	Pre-mRNA-processing factor 40 homolog A OS=Homo sapiens OX=9606 GN=PRPF40A PE=1 SV=1
1060	2118	sp|Q99570|PI3R4_HUMAN	93.25	6	1	0	6	2	420000		3420000	2910000	8	8	1	0	8	3	Carbamidomethylation	153103	Phosphoinositide 3-kinase regulatory subunit 4 OS=Homo sapiens OX=9606 GN=PIK3R4 PE=1 SV=3
1007	1879	sp|P52306|GDS1_HUMAN	93.24	14	0	0	12	7			722000	336000	7	6	0	0	7	5		66317	Rap1 GTPase-GDP dissociation stimulator 1 OS=Homo sapiens OX=9606 GN=RAP1GDS1 PE=1 SV=3
1158	3117	sp|Q9H8H2|DDX31_HUMAN	92.82	6	0	0	3	6			1340000	2480000	5	5	0	0	2	6		94087	Probable ATP-dependent RNA helicase DDX31 OS=Homo sapiens OX=9606 GN=DDX31 PE=1 SV=2
1158	3118	tr|F8WAJ0|F8WAJ0_HUMAN	92.82	7	0	0	3	7			1340000	2480000	5	5	0	0	2	6		83516	RNA helicase OS=Homo sapiens OX=9606 GN=DDX31 PE=1 SV=2
1000	2163	tr|A0A3B3IS71|A0A3B3IS71_HUMAN	92.68	7	0	0	7	3			1240000	684000	6	6	0	0	7	4		105454	Retinoblastoma-associated protein OS=Homo sapiens OX=9606 GN=RB1 PE=1 SV=1
1000	2164	sp|P06400|RB_HUMAN	92.68	6	0	0	6	3			1240000	684000	6	6	0	0	7	4		106159	Retinoblastoma-associated protein OS=Homo sapiens OX=9606 GN=RB1 PE=1 SV=2
944	2216	sp|Q92990|GLMN_HUMAN	92.64	9	0	0	7	7			1590000	792000	5	5	0	0	4	5	Acetylation (Protein N-term)	68208	Glomulin OS=Homo sapiens OX=9606 GN=GLMN PE=1 SV=2
858	2180	sp|Q9BR76|COR1B_HUMAN	92.47	11	0	0	11	6			16900000	4070000	6	4	0	0	9	3	Carbamidomethylation; Deamidation (NQ)	54235	Coronin-1B OS=Homo sapiens OX=9606 GN=CORO1B PE=1 SV=1
1059	2077	sp|O75165|DJC13_HUMAN	92.31	4	0	0	3	1			852000	317000	8	7	0	0	7	3		254412	DnaJ homolog subfamily C member 13 OS=Homo sapiens OX=9606 GN=DNAJC13 PE=1 SV=5
542	4453	tr|A0A075B7B8|A0A075B7B8_HUMAN	91.96	19	19	19	0	0	72500	746000			3	1	17	15	0	0	Carbamidomethylation; Oxidation (M); Deamidation (NQ)	12875	Immunoglobulin heavy variable 3/OR16-12 (non-functional) (Fragment) OS=Homo sapiens OX=9606 GN=IGHV3OR16-12 PE=1 SV=1
1049	2973	tr|C9JEU5|C9JEU5_HUMAN	91.71	9	0	0	5	9			2250000	4210000	3	3	0	0	3	4	Carbamidomethylation	50323	Fibrinogen gamma chain OS=Homo sapiens OX=9606 GN=FGG PE=1 SV=1
1049	2974	sp|P02679|FIBG_HUMAN	91.71	9	0	0	5	9			2250000	4210000	3	3	0	0	3	4	Carbamidomethylation	51512	Fibrinogen gamma chain OS=Homo sapiens OX=9606 GN=FGG PE=1 SV=3
1049	2975	tr|C9JC84|C9JC84_HUMAN	91.71	9	0	0	5	9			2250000	4210000	3	3	0	0	3	4	Carbamidomethylation	52338	Fibrinogen gamma chain OS=Homo sapiens OX=9606 GN=FGG PE=1 SV=1
1281	3145	tr|H3BN98|H3BN98_HUMAN	91.52	13	13	0	0	0	1070000				3	3	4	0	0	0	Oxidation (M)	27168	Uncharacterized protein (Fragment) OS=Homo sapiens OX=9606 PE=4 SV=2
1281	3153	tr|I3L3P7|I3L3P7_HUMAN	91.52	30	30	0	0	0	1070000				3	3	4	0	0	0	Oxidation (M)	11478	40S ribosomal protein S15a OS=Homo sapiens OX=9606 GN=RPS15A PE=1 SV=1
1281	3155	tr|I3L246|I3L246_HUMAN	91.52	27	27	0	0	0	1070000				3	3	4	0	0	0	Oxidation (M)	12303	40S ribosomal protein S15a OS=Homo sapiens OX=9606 GN=RPS15A PE=1 SV=1
1281	3156	sp|P62244|RS15A_HUMAN	91.52	23	23	0	0	0	1070000				3	3	4	0	0	0	Oxidation (M)	14840	40S ribosomal protein S15a OS=Homo sapiens OX=9606 GN=RPS15A PE=1 SV=2
1186	2195	sp|Q96CB8|INT12_HUMAN	91.4	16	0	0	13	5			4670000	17400000	5	5	0	0	4	2		48808	Integrator complex subunit 12 OS=Homo sapiens OX=9606 GN=INTS12 PE=1 SV=1
1186	2430	tr|A0A087WXN4|A0A087WXN4_HUMAN	91.4	14	0	0	14	2			4670000	743000	4	4	0	0	4	1		46667	Integrator complex subunit 12 OS=Homo sapiens OX=9606 GN=INTS12 PE=1 SV=1
813	4624	sp|A0A0J9YVY3|HV741_HUMAN	91.37	22	22	22	0	0	1620000	2930000			4	3	8	7	0	0	Carbamidomethylation; Oxidation (M); Deamidation (NQ)	12849	Immunoglobulin heavy variable 7-4-1 OS=Homo sapiens OX=9606 GN=IGHV7-4-1 PE=3 SV=1
1191	3099	sp|Q9Y285|SYFA_HUMAN	90.85	11	0	0	9	4			2150000	430000	6	6	0	0	6	2	Acetylation (Protein N-term)	57564	Phenylalanine--tRNA ligase alpha subunit OS=Homo sapiens OX=9606 GN=FARSA PE=1 SV=3
862	2627	sp|P12314|FCGR1_HUMAN	90.67	13	8	13	3	6	2450000	2020000	0	230000	6	5	4	6	1	2		42632	High affinity immunoglobulin gamma Fc receptor I OS=Homo sapiens OX=9606 GN=FCGR1A PE=1 SV=2
1120	2483	sp|O75027|ABCB7_HUMAN	90.65	10	0	0	0	10				4730000	6	6	0	0	0	6		82641	ATP-binding cassette sub-family B member 7 mitochondrial OS=Homo sapiens OX=9606 GN=ABCB7 PE=1 SV=2
1109	2153	sp|P60484|PTEN_HUMAN	90.06	14	0	0	9	11			1430000	1380000	5	5	0	0	4	4		47166	Phosphatidylinositol 3 4 5-trisphosphate 3-phosphatase and dual-specificity protein phosphatase PTEN OS=Homo sapiens OX=9606 GN=PTEN PE=1 SV=1
998	2293	sp|P57740|NU107_HUMAN	89.9	7	0	0	7	3			2590000	620000	6	6	0	0	6	3		106374	Nuclear pore complex protein Nup107 OS=Homo sapiens OX=9606 GN=NUP107 PE=1 SV=1
1046	2226	tr|Q96I63|Q96I63_HUMAN	89.75	6	0	0	6	3			2650000	596000	4	4	0	0	4	3		82666	ATP-dependent zinc metalloprotease YME1L1 OS=Homo sapiens OX=9606 GN=YME1L1 PE=1 SV=1
1046	2227	sp|Q96TA2|YMEL1_HUMAN	89.75	6	0	0	6	3			2650000	596000	4	4	0	0	4	3		86455	ATP-dependent zinc metalloprotease YME1L1 OS=Homo sapiens OX=9606 GN=YME1L1 PE=1 SV=2
1068	2699	sp|Q8NHM5|KDM2B_HUMAN	89.7	4	1	1	2	2	0	26500	360000	360000	5	5	1	2	2	2		152614	Lysine-specific demethylase 2B OS=Homo sapiens OX=9606 GN=KDM2B PE=1 SV=1
1166	2095	sp|Q8N884|CGAS_HUMAN	89.65	16	0	0	11	5			1130000	1000000	6	6	0	0	4	2		58815	Cyclic GMP-AMP synthase OS=Homo sapiens OX=9606 GN=CGAS PE=1 SV=2
1030	2214	sp|O43292|GPAA1_HUMAN	89.23	9	0	0	9	4			2790000	608000	5	5	0	0	5	2	Carbamidomethylation	67623	Glycosylphosphatidylinositol anchor attachment 1 protein OS=Homo sapiens OX=9606 GN=GPAA1 PE=1 SV=3
1095	3179	sp|Q14195|DPYL3_HUMAN	89.23	7	1	4	3	4				0	4	1	1	2	2	3	Oxidation (M)	61963	Dihydropyrimidinase-related protein 3 OS=Homo sapiens OX=9606 GN=DPYSL3 PE=1 SV=1
1159	3226	sp|O75955|FLOT1_HUMAN	89.22	10	10	4	0	0	614000	126000			4	4	4	2	0	0		47355	Flotillin-1 OS=Homo sapiens OX=9606 GN=FLOT1 PE=1 SV=3
1116	2046	sp|Q86WB0|NIPA_HUMAN	88.97	12	0	0	7	8			36000000	2940000	5	5	0	0	3	4	Deamidation (NQ)	55262	Nuclear-interacting partner of ALK OS=Homo sapiens OX=9606 GN=ZC3HC1 PE=1 SV=1
1116	2055	tr|C9J0I9|C9J0I9_HUMAN	88.97	13	0	0	7	9			36000000	2940000	5	5	0	0	3	4	Deamidation (NQ)	50562	Nuclear-interacting partner of ALK OS=Homo sapiens OX=9606 GN=ZC3HC1 PE=1 SV=1
1071	2691	sp|P63104|1433Z_HUMAN	88.85	16	0	0	7	16				758000	4	1	0	0	3	4	Oxidation (M); Deamidation (NQ)	27745	14-3-3 protein zeta/delta OS=Homo sapiens OX=9606 GN=YWHAZ PE=1 SV=1
1071	2692	tr|E7EX29|E7EX29_HUMAN	88.85	16	0	0	7	16				758000	4	1	0	0	3	4	Oxidation (M); Deamidation (NQ)	28037	14-3-3 protein zeta/delta (Fragment) OS=Homo sapiens OX=9606 GN=YWHAZ PE=1 SV=1
1394	3307	sp|P62937|PPIA_HUMAN	88.76	32	32	0	0	0	787000				4	4	4	0	0	0	Carbamidomethylation	18012	Peptidyl-prolyl cis-trans isomerase A OS=Homo sapiens OX=9606 GN=PPIA PE=1 SV=2
926	3654	sp|P19105|ML12A_HUMAN	88.76	12	12	12	6	12	790000	686000	563000	505000	2	2	3	3	1	2		19794	Myosin regulatory light chain 12A OS=Homo sapiens OX=9606 GN=MYL12A PE=1 SV=2
926	3655	sp|O14950|ML12B_HUMAN	88.76	12	12	12	6	12	790000	686000	563000	505000	2	2	3	3	1	2		19779	Myosin regulatory light chain 12B OS=Homo sapiens OX=9606 GN=MYL12B PE=1 SV=2
926	3656	tr|J3QRS3|J3QRS3_HUMAN	88.76	12	12	12	6	12	790000	686000	563000	505000	2	2	3	3	1	2		20457	Myosin regulatory light chain 12A OS=Homo sapiens OX=9606 GN=MYL12A PE=1 SV=1
1021	2233	sp|P26641|EF1G_HUMAN	88.59	16	13	8	3	3	1120000	521000	76700	271000	6	6	6	3	1	1	Acetylation (Protein N-term)	50119	Elongation factor 1-gamma OS=Homo sapiens OX=9606 GN=EEF1G PE=1 SV=3
471	2335	sp|Q06830|PRDX1_HUMAN	88.45	23	18	23	15	15	412000	421000	404000	772000	5	4	5	8	9	8		22110	Peroxiredoxin-1 OS=Homo sapiens OX=9606 GN=PRDX1 PE=1 SV=1
471	2356	tr|A0A0A0MSI0|A0A0A0MSI0_HUMAN	88.45	27	21	27	17	17	412000	421000	404000	772000	5	4	5	8	9	8		18976	Peroxiredoxin-1 (Fragment) OS=Homo sapiens OX=9606 GN=PRDX1 PE=1 SV=1
988	2324	sp|Q14814|MEF2D_HUMAN	88.43	11	0	0	8	9			1920000	3100000	5	4	0	0	4	4	Deamidation (NQ)	55938	Myocyte-specific enhancer factor 2D OS=Homo sapiens OX=9606 GN=MEF2D PE=1 SV=1
1110	2541	sp|Q6PCE3|PGM2L_HUMAN	88.35	9	0	0	0	9				3130000	5	5	0	0	0	6		70442	Glucose 1 6-bisphosphate synthase OS=Homo sapiens OX=9606 GN=PGM2L1 PE=1 SV=3
1147	2996	tr|H3BPS8|H3BPS8_HUMAN	88.29	17	17	0	4	9	1620000		205000	707000	4	3	4	0	1	3		30427	Fructose-bisphosphate aldolase A (Fragment) OS=Homo sapiens OX=9606 GN=ALDOA PE=1 SV=1
1147	2998	tr|H3BQN4|H3BQN4_HUMAN	88.29	13	13	0	3	7	1620000		205000	707000	4	3	4	0	1	3		39340	Fructose-bisphosphate aldolase OS=Homo sapiens OX=9606 GN=ALDOA PE=1 SV=1
1147	2999	sp|P04075|ALDOA_HUMAN	88.29	13	13	0	3	7	1620000		205000	707000	4	3	4	0	1	3		39420	Fructose-bisphosphate aldolase A OS=Homo sapiens OX=9606 GN=ALDOA PE=1 SV=2
1147	3000	tr|J3KPS3|J3KPS3_HUMAN	88.29	13	13	0	3	7	1620000		205000	707000	4	3	4	0	1	3		39818	Fructose-bisphosphate aldolase OS=Homo sapiens OX=9606 GN=ALDOA PE=1 SV=1
885	2277	sp|Q14692|BMS1_HUMAN	88.19	6	0	0	6	2			2450000	875000	6	6	0	0	9	3	Oxidation (M); Deamidation (NQ)	145807	Ribosome biogenesis protein BMS1 homolog OS=Homo sapiens OX=9606 GN=BMS1 PE=1 SV=1
1311	3319	sp|Q5K651|SAMD9_HUMAN	88.17	3	0	0	2	1			901000	145000	4	4	0	0	3	2		184280	Sterile alpha motif domain-containing protein 9 OS=Homo sapiens OX=9606 GN=SAMD9 PE=1 SV=1
947	1846	tr|A0A1B0GVU9|A0A1B0GVU9_HUMAN	88.12	12	0	0	10	4			11100000	1020000	7	7	0	0	7	3		83783	Glutamine--tRNA ligase (Fragment) OS=Homo sapiens OX=9606 GN=QARS PE=1 SV=1
947	1908	tr|B4DDN1|B4DDN1_HUMAN	88.12	12	0	0	10	5			1630000	1020000	6	6	0	0	6	3		71739	Glutamine--tRNA ligase OS=Homo sapiens OX=9606 GN=QARS PE=1 SV=1
947	1910	sp|P47897|SYQ_HUMAN	88.12	10	0	0	8	4			1630000	1020000	6	6	0	0	6	3		87799	Glutamine--tRNA ligase OS=Homo sapiens OX=9606 GN=QARS PE=1 SV=1
527	3034	sp|A0A0C4DH31|HV118_HUMAN	88.11	25	25	25	14	14	15400000	17000000	6250000	6190000	6	6	13	15	2	3	Carbamidomethylation; Oxidation (M)	12820	Immunoglobulin heavy variable 1-18 OS=Homo sapiens OX=9606 GN=IGHV1-18 PE=3 SV=1
1079	2365	sp|Q7Z3J2|CP062_HUMAN	88.02	4	0	0	4	4			653000	188000	4	4	0	0	4	3	Acetylation (Protein N-term)	109562	UPF0505 protein C16orf62 OS=Homo sapiens OX=9606 GN=C16orf62 PE=1 SV=2
1355	3083	sp|Q9Y277|VDAC3_HUMAN	87.79	14	14	0	0	0	106000				3	2	3	0	0	0		30659	Voltage-dependent anion-selective channel protein 3 OS=Homo sapiens OX=9606 GN=VDAC3 PE=1 SV=1
880	2559	tr|A0A1B0GW38|A0A1B0GW38_HUMAN	87.75	10	0	0	5	10			2000000	4170000	7	7	0	0	4	8		95951	E3 ubiquitin-protein ligase CBL (Fragment) OS=Homo sapiens OX=9606 GN=CBL PE=1 SV=1
880	2560	tr|A0A0U1RQX8|A0A0U1RQX8_HUMAN	87.75	10	0	0	5	10			2000000	4170000	7	7	0	0	4	8		96887	E3 ubiquitin-protein ligase CBL OS=Homo sapiens OX=9606 GN=CBL PE=1 SV=1
880	2561	sp|P22681|CBL_HUMAN	87.75	10	0	0	5	10			2000000	4170000	7	7	0	0	4	8		99633	E3 ubiquitin-protein ligase CBL OS=Homo sapiens OX=9606 GN=CBL PE=1 SV=2
880	2584	tr|A0A0U1RR39|A0A0U1RR39_HUMAN	87.75	10	0	0	4	10			1600000	3520000	6	6	0	0	3	7		95098	E3 ubiquitin-protein ligase CBL OS=Homo sapiens OX=9606 GN=CBL PE=1 SV=1
955	2781	sp|Q13867|BLMH_HUMAN	87.75	8	8	5	2	2	841000	343000	461000	922000	3	3	3	2	2	2		52562	Bleomycin hydrolase OS=Homo sapiens OX=9606 GN=BLMH PE=1 SV=1
955	2802	tr|K7ES02|K7ES02_HUMAN	87.75	11	11	7	3	3	841000	343000	461000	922000	3	3	3	2	2	2		37198	Bleomycin hydrolase (Fragment) OS=Homo sapiens OX=9606 GN=BLMH PE=1 SV=1
955	2839	tr|K7ESE8|K7ESE8_HUMAN	87.75	15	15	10	5	5	841000	343000	461000	922000	3	3	3	2	2	2		26739	Bleomycin hydrolase (Fragment) OS=Homo sapiens OX=9606 GN=BLMH PE=1 SV=1
955	2841	tr|J3KSD8|J3KSD8_HUMAN	87.75	13	13	9	4	4	841000	343000	461000	922000	3	3	3	2	2	2		30264	Bleomycin hydrolase (Fragment) OS=Homo sapiens OX=9606 GN=BLMH PE=1 SV=8
916	3539	sp|Q9NZT1|CALL5_HUMAN	87.2	21	10	15	14	21	623000	1520000	695000	3980000	5	4	2	5	2	4	Acetylation (Protein N-term)	15893	Calmodulin-like protein 5 OS=Homo sapiens OX=9606 GN=CALML5 PE=1 SV=2
973	2900	tr|C9JW69|C9JW69_HUMAN	86.8	10	2	0	10	4	138000		2270000	1150000	4	4	1	0	5	3	Oxidation (M)	39584	Regulator of chromosome condensation (Fragment) OS=Homo sapiens OX=9606 GN=RCC1 PE=1 SV=1
973	2905	sp|P18754|RCC1_HUMAN	86.8	9	2	0	9	4	138000		2270000	1150000	4	4	1	0	5	3	Oxidation (M)	44969	Regulator of chromosome condensation OS=Homo sapiens OX=9606 GN=RCC1 PE=1 SV=1
1263	3225	sp|Q9HA77|SYCM_HUMAN	86.75	9	0	0	7	5			1600000	894000	4	4	0	0	3	2		62224	Probable cysteine--tRNA ligase mitochondrial OS=Homo sapiens OX=9606 GN=CARS2 PE=1 SV=1
1106	3905	tr|A0A0C4DH35|A0A0C4DH35_HUMAN	86.71	26	26	23	0	0	289000	236000			3	1	4	3	0	0		12810	Immunoglobulin heavy variable 3-35 (non-functional) (Fragment) OS=Homo sapiens OX=9606 GN=IGHV3-35 PE=1 SV=1
1375	2777	sp|P04279|SEMG1_HUMAN	86.67	15	0	15	0	0		228000			5	3	0	5	0	0		52131	Semenogelin-1 OS=Homo sapiens OX=9606 GN=SEMG1 PE=1 SV=2
942	2397	sp|P20700|LMNB1_HUMAN	86.18	14	0	5	3	11		25600		2140000	7	5	0	2	3	7	Acetylation (Protein N-term)	66408	Lamin-B1 OS=Homo sapiens OX=9606 GN=LMNB1 PE=1 SV=2
863	2891	sp|P06239|LCK_HUMAN	86.09	5	2	0	5	5					3	0	1	0	6	5		58001	Tyrosine-protein kinase Lck OS=Homo sapiens OX=9606 GN=LCK PE=1 SV=6
863	2893	tr|Q573B4|Q573B4_HUMAN	86.09	5	2	0	5	5					3	0	1	0	6	5		58333	Tyrosine-protein kinase OS=Homo sapiens OX=9606 GN=LCK PE=1 SV=1
1209	3029	sp|P05543|THBG_HUMAN	86.06	7	0	0	4	7					3	0	0	0	2	3		46325	Thyroxine-binding globulin OS=Homo sapiens OX=9606 GN=SERPINA7 PE=1 SV=2
1411	3010	sp|Q96HE7|ERO1A_HUMAN	86.05	7	3	0	0	4	246000			445000	3	3	1	0	0	2		54393	ERO1-like protein alpha OS=Homo sapiens OX=9606 GN=ERO1A PE=1 SV=2
915	2409	sp|Q9Y5Q9|TF3C3_HUMAN	85.99	5	0	0	5	2			858000	248000	4	4	0	0	8	2		101272	General transcription factor 3C polypeptide 3 OS=Homo sapiens OX=9606 GN=GTF3C3 PE=1 SV=1
778	2877	sp|P05109|S10A8_HUMAN	85.92	31	24	12	31	31	296000	550000	1610000	2270000	4	4	4	3	4	5	Carbamidomethylation; Oxidation (M)	10835	Protein S100-A8 OS=Homo sapiens OX=9606 GN=S100A8 PE=1 SV=1
924	2617	sp|P22234|PUR6_HUMAN	85.74	15	14	8	2	2	1140000	919000			7	6	8	4	1	2	Acetylation (Protein N-term)	47079	Multifunctional protein ADE2 OS=Homo sapiens OX=9606 GN=PAICS PE=1 SV=3
1025	5750	sp|Q92688|AN32B_HUMAN	85.66	8	8	8	0	0	515000	276000			3	3	5	3	0	0		28788	Acidic leucine-rich nuclear phosphoprotein 32 family member B OS=Homo sapiens OX=9606 GN=ANP32B PE=1 SV=1
914	1801	tr|B7WP74|B7WP74_HUMAN	85.65	10	0	0	8	8			1640000	767000	7	7	0	0	6	6		85577	Pre-mRNA-splicing factor CWC22 homolog (Fragment) OS=Homo sapiens OX=9606 GN=CWC22 PE=1 SV=1
914	1810	sp|Q9HCG8|CWC22_HUMAN	85.65	8	0	0	6	7			1640000	767000	7	7	0	0	6	6		105466	Pre-mRNA-splicing factor CWC22 homolog OS=Homo sapiens OX=9606 GN=CWC22 PE=1 SV=3
902	2040	sp|Q8WUA4|TF3C2_HUMAN	85.65	8	0	0	8	4			1840000	746000	6	6	0	0	7	4	Carbamidomethylation	100680	General transcription factor 3C polypeptide 2 OS=Homo sapiens OX=9606 GN=GTF3C2 PE=1 SV=2
882	1985	tr|E7EX90|E7EX90_HUMAN	85.57	7	0	0	6	3			1520000	410000	8	8	0	0	8	5		139094	Dynactin subunit 1 OS=Homo sapiens OX=9606 GN=DCTN1 PE=1 SV=1
882	1986	sp|Q14203|DCTN1_HUMAN	85.57	7	0	0	6	3			1520000	410000	8	8	0	0	8	5		141694	Dynactin subunit 1 OS=Homo sapiens OX=9606 GN=DCTN1 PE=1 SV=3
1217	2849	sp|P00450|CERU_HUMAN	85.17	5	0	1	2	4		0	808000	1320000	4	4	0	1	1	3	Carbamidomethylation; Oxidation (M)	122205	Ceruloplasmin OS=Homo sapiens OX=9606 GN=CP PE=1 SV=1
1217	2852	tr|E9PFZ2|E9PFZ2_HUMAN	85.17	6	0	1	2	5		0	808000	1320000	4	4	0	1	1	3	Carbamidomethylation; Oxidation (M)	108820	Ceruloplasmin OS=Homo sapiens OX=9606 GN=CP PE=1 SV=1
1388	4169	tr|A6NEL0|A6NEL0_HUMAN	85.15	23	11	7	11	23	82400	14700	161000	508000	3	3	2	1	1	2		12435	Non-histone chromosomal protein HMG-14 OS=Homo sapiens OX=9606 GN=HMGN1 PE=1 SV=1
1388	4432	tr|F2Z2W6|F2Z2W6_HUMAN	85.15	61	30	18	30	61	82400	14700	161000	508000	3	3	2	1	1	2		4745	Non-histone chromosomal protein HMG-14 OS=Homo sapiens OX=9606 GN=HMGN1 PE=1 SV=1
1388	4433	tr|F2Z2Y5|F2Z2Y5_HUMAN	85.15	60	29	18	29	60	82400	14700	161000	508000	3	3	2	1	1	2		4813	Non-histone chromosomal protein HMG-14 OS=Homo sapiens OX=9606 GN=HMGN1 PE=1 SV=1
1388	4434	tr|H7BXJ5|H7BXJ5_HUMAN	85.15	56	27	17	27	56	82400	14700	161000	508000	3	3	2	1	1	2		5166	Non-histone chromosomal protein HMG-14 OS=Homo sapiens OX=9606 GN=HMGN1 PE=1 SV=1
1388	4435	sp|P05114|HMGN1_HUMAN	85.15	27	13	8	13	27	82400	14700	161000	508000	3	3	2	1	1	2		10659	Non-histone chromosomal protein HMG-14 OS=Homo sapiens OX=9606 GN=HMGN1 PE=1 SV=3
966	2158	sp|Q9Y4W6|AFG32_HUMAN	85.1	7	0	0	4	6			1100000	1090000	6	5	0	0	3	6		88584	AFG3-like protein 2 OS=Homo sapiens OX=9606 GN=AFG3L2 PE=1 SV=2
1100	2012	tr|M0R3F6|M0R3F6_HUMAN	85.03	9	0	0	6	4			1390000	143000	7	7	0	0	5	3	Carbamidomethylation	93860	SURP and G-patch domain-containing protein 2 OS=Homo sapiens OX=9606 GN=SUGP2 PE=1 SV=1
1100	2016	sp|Q8IX01|SUGP2_HUMAN	85.03	7	0	0	5	3			1390000	143000	7	7	0	0	5	3	Carbamidomethylation	120207	SURP and G-patch domain-containing protein 2 OS=Homo sapiens OX=9606 GN=SUGP2 PE=1 SV=2
1100	2017	tr|M0R2Z9|M0R2Z9_HUMAN	85.03	7	0	0	5	3			1390000	143000	7	7	0	0	5	3	Carbamidomethylation	121545	SURP and G-patch domain-containing protein 2 OS=Homo sapiens OX=9606 GN=SUGP2 PE=1 SV=1
1138	2286	sp|Q5T200|ZC3HD_HUMAN	85.02	4	0	0	4	0			2940000		6	6	0	0	6	0		196635	Zinc finger CCCH domain-containing protein 13 OS=Homo sapiens OX=9606 GN=ZC3H13 PE=1 SV=1
1136	2630	sp|Q14146|URB2_HUMAN	85	7	3	1	3	0	66800	0	494000		6	6	1	1	5	0	Carbamidomethylation; Deamidation (NQ)	170543	Unhealthy ribosome biogenesis protein 2 homolog OS=Homo sapiens OX=9606 GN=URB2 PE=1 SV=2
1237	2853	sp|P02751|FINC_HUMAN	84.83	2	1	0	0	1	862000			577000	4	4	3	0	0	1		262622	Fibronectin OS=Homo sapiens OX=9606 GN=FN1 PE=1 SV=4
864	4172	tr|D3YTB1|D3YTB1_HUMAN	84.77	22	15	22	0	0	993000	976000			3	3	5	7	0	0	Carbamidomethylation	15617	60S ribosomal protein L32 (Fragment) OS=Homo sapiens OX=9606 GN=RPL32 PE=1 SV=1
864	4173	sp|P62910|RL32_HUMAN	84.77	21	15	21	0	0	993000	976000			3	3	5	7	0	0	Carbamidomethylation	15860	60S ribosomal protein L32 OS=Homo sapiens OX=9606 GN=RPL32 PE=1 SV=2
864	4174	tr|F8W727|F8W727_HUMAN	84.77	19	13	19	0	0	993000	976000			3	3	5	7	0	0	Carbamidomethylation	17962	60S ribosomal protein L32 OS=Homo sapiens OX=9606 GN=RPL32 PE=1 SV=1
985	2656	sp|O75223|GGCT_HUMAN	84.7	24	13	18	13	6	246000	299000	185000	41700	4	4	3	3	2	1	Carbamidomethylation	21008	Gamma-glutamylcyclotransferase OS=Homo sapiens OX=9606 GN=GGCT PE=1 SV=1
943	3175	tr|E9PG73|E9PG73_HUMAN	84.68	7	0	0	7	5			3520000	902000	5	5	0	0	6	5	Carbamidomethylation; Oxidation (M)	87089	Peptidyl-prolyl cis-trans isomerase G OS=Homo sapiens OX=9606 GN=PPIG PE=1 SV=1
943	3176	sp|Q13427|PPIG_HUMAN	84.68	6	0	0	6	5			3520000	902000	5	5	0	0	6	5	Carbamidomethylation; Oxidation (M)	88617	Peptidyl-prolyl cis-trans isomerase G OS=Homo sapiens OX=9606 GN=PPIG PE=1 SV=2
943	3178	tr|C9JN15|C9JN15_HUMAN	84.68	20	0	0	20	15			3520000	902000	5	5	0	0	6	5	Carbamidomethylation; Oxidation (M)	27410	Peptidyl-prolyl cis-trans isomerase (Fragment) OS=Homo sapiens OX=9606 GN=PPIG PE=1 SV=1
980	2606	sp|O60216|RAD21_HUMAN	84.59	8	0	0	8	4			916000	324000	4	4	0	0	6	3	Carbamidomethylation	71690	Double-strand-break repair protein rad21 homolog OS=Homo sapiens OX=9606 GN=RAD21 PE=1 SV=2
1542	3989	sp|Q8NCF5|NF2IP_HUMAN	84.5	6	0	0	0	6				314000	2	2	0	0	0	2		45817	NFATC2-interacting protein OS=Homo sapiens OX=9606 GN=NFATC2IP PE=1 SV=1
967	2557	sp|A3KN83|SBNO1_HUMAN	84.4	5	0	0	5	2			822000	157000	7	6	0	0	8	3		154312	Protein strawberry notch homolog 1 OS=Homo sapiens OX=9606 GN=SBNO1 PE=1 SV=1
817	2442	tr|M0R0P1|M0R0P1_HUMAN	84.37	36	5	5	10	36	305000	97700	672000	1620000	7	7	1	1	3	9		24544	rRNA 2'-O-methyltransferase fibrillarin (Fragment) OS=Homo sapiens OX=9606 GN=FBL PE=1 SV=1
817	2443	tr|M0R299|M0R299_HUMAN	84.37	36	5	5	10	36	305000	97700	672000	1620000	7	7	1	1	3	9		25308	rRNA 2'-O-methyltransferase fibrillarin (Fragment) OS=Homo sapiens OX=9606 GN=FBL PE=1 SV=1
817	2444	tr|M0QXL5|M0QXL5_HUMAN	84.37	34	5	5	9	34	305000	97700	672000	1620000	7	7	1	1	3	9		26639	rRNA 2'-O-methyltransferase fibrillarin (Fragment) OS=Homo sapiens OX=9606 GN=FBL PE=1 SV=1
817	2445	tr|M0R2Q4|M0R2Q4_HUMAN	84.37	30	4	4	8	30	305000	97700	672000	1620000	7	7	1	1	3	9		29182	rRNA 2'-O-methyltransferase fibrillarin (Fragment) OS=Homo sapiens OX=9606 GN=FBL PE=1 SV=1
817	2446	sp|P22087|FBRL_HUMAN	84.37	26	3	3	7	26	305000	97700	672000	1620000	7	7	1	1	3	9		33784	rRNA 2'-O-methyltransferase fibrillarin OS=Homo sapiens OX=9606 GN=FBL PE=1 SV=2
1155	2594	tr|E9PF10|E9PF10_HUMAN	84.08	6	0	0	5	1			1240000	91300	5	5	0	0	5	1		148094	Nuclear pore complex protein Nup155 OS=Homo sapiens OX=9606 GN=NUP155 PE=1 SV=1
1155	2595	sp|O75694|NU155_HUMAN	84.08	6	0	0	4	1			1240000	91300	5	5	0	0	5	1		155199	Nuclear pore complex protein Nup155 OS=Homo sapiens OX=9606 GN=NUP155 PE=1 SV=1
1450	4274	tr|E7EVQ6|E7EVQ6_HUMAN	83.93	5	0	0	5	3			445000	127000	2	2	0	0	2	1		53068	Squalene monooxygenase OS=Homo sapiens OX=9606 GN=SQLE PE=1 SV=1
1450	4275	sp|Q14534|ERG1_HUMAN	83.93	5	0	0	5	3			445000	127000	2	2	0	0	2	1		63923	Squalene monooxygenase OS=Homo sapiens OX=9606 GN=SQLE PE=1 SV=3
969	2734	tr|F5H3Y4|F5H3Y4_HUMAN	83.59	7	2	0	5	2	10800		1260000	305000	6	6	1	0	6	3	Carbamidomethylation; Oxidation (M); Deamidation (NQ)	107303	Probable ATP-dependent RNA helicase DHX37 OS=Homo sapiens OX=9606 GN=DHX37 PE=1 SV=1
1642	4232	tr|A0A1B0GV45|A0A1B0GV45_HUMAN	83.49	8	0	0	8	0			0		2	2	0	0	2	0		49728	Unconventional myosin-XVIIIa (Fragment) OS=Homo sapiens OX=9606 GN=MYO18A PE=1 SV=1
877	2030	sp|Q8N201|INT1_HUMAN	83.38	4	0	0	4	1			1970000	300000	8	8	0	0	8	2		244295	Integrator complex subunit 1 OS=Homo sapiens OX=9606 GN=INTS1 PE=1 SV=2
1114	3216	tr|H3BRY6|H3BRY6_HUMAN	83.21	8	0	0	8	8			985000	877000	3	3	0	0	3	3		51584	Integrator complex subunit 14 OS=Homo sapiens OX=9606 GN=INTS14 PE=1 SV=1
1114	3217	tr|B4DVT3|B4DVT3_HUMAN	83.21	8	0	0	8	8			985000	877000	3	3	0	0	3	3		53588	Integrator complex subunit 14 OS=Homo sapiens OX=9606 GN=INTS14 PE=1 SV=1
1114	3218	sp|Q96SY0|INT14_HUMAN	83.21	8	0	0	8	8			985000	877000	3	3	0	0	3	3		57471	Integrator complex subunit 14 OS=Homo sapiens OX=9606 GN=INTS14 PE=1 SV=2
1114	3219	tr|B4DJL6|B4DJL6_HUMAN	83.21	7	0	0	7	7			985000	877000	3	3	0	0	3	3		61346	Integrator complex subunit 14 OS=Homo sapiens OX=9606 GN=INTS14 PE=1 SV=1
1061	2704	sp|Q9Y4C8|RBM19_HUMAN	83.21	4	0	0	2	4			420000	487000	4	4	0	0	2	4		107332	Probable RNA-binding protein 19 OS=Homo sapiens OX=9606 GN=RBM19 PE=1 SV=3
760	4048	sp|Q9C075|K1C23_HUMAN	83.08	4	4	4	2	0					3	0	5	7	4	0	Oxidation (M)	48131	Keratin type I cytoskeletal 23 OS=Homo sapiens OX=9606 GN=KRT23 PE=1 SV=2
760	4277	tr|J3QR55|J3QR55_HUMAN	83.08	11	11	11	5	0					3	0	5	7	4	0	Oxidation (M)	17538	Keratin type I cytoskeletal 23 (Fragment) OS=Homo sapiens OX=9606 GN=KRT23 PE=1 SV=1
970	2806	sp|Q9NZN4|EHD2_HUMAN	82.93	5	0	0	3	5				208000	4	1	0	0	3	5		61162	EH domain-containing protein 2 OS=Homo sapiens OX=9606 GN=EHD2 PE=1 SV=2
1010	2009	sp|Q93009|UBP7_HUMAN	82.63	5	0	0	4	2			778000	616000	6	6	0	0	5	3	Carbamidomethylation	128302	Ubiquitin carboxyl-terminal hydrolase 7 OS=Homo sapiens OX=9606 GN=USP7 PE=1 SV=2
958	2172	sp|Q92556|ELMO1_HUMAN	82.56	7	0	0	7	5			1220000	612000	5	4	0	0	5	4		83829	Engulfment and cell motility protein 1 OS=Homo sapiens OX=9606 GN=ELMO1 PE=1 SV=2
941	2251	sp|Q01780|EXOSX_HUMAN	82.48	7	0	0	7	4			843000	378000	6	6	0	0	5	6		100831	Exosome component 10 OS=Homo sapiens OX=9606 GN=EXOSC10 PE=1 SV=2
921	2403	sp|Q8NDT2|RB15B_HUMAN	82.48	7	0	0	5	5			363000	253000	6	5	0	0	6	4		97205	Putative RNA-binding protein 15B OS=Homo sapiens OX=9606 GN=RBM15B PE=1 SV=3
1177	4249	tr|A0A075B7D8|A0A075B7D8_HUMAN	82.46	25	25	13	0	0	275000				3	1	5	2	0	0		13080	Immunoglobulin heavy variable 3/OR15-7 (pseudogene) (Fragment) OS=Homo sapiens OX=9606 GN=IGHV3OR15-7 PE=1 SV=1
1344	3360	sp|Q9HAV4|XPO5_HUMAN	82.4	3	0	0	3	0			309000		3	3	0	0	4	0		136311	Exportin-5 OS=Homo sapiens OX=9606 GN=XPO5 PE=1 SV=1
1187	2493	sp|Q6P158|DHX57_HUMAN	82.28	3	0	0	3	1			144000		4	2	0	0	4	1	Carbamidomethylation	155604	Putative ATP-dependent RNA helicase DHX57 OS=Homo sapiens OX=9606 GN=DHX57 PE=1 SV=2
1197	2710	sp|Q8NBS9|TXND5_HUMAN	82	9	2	9	0	0	57300	629000			4	4	1	4	0	0		47629	Thioredoxin domain-containing protein 5 OS=Homo sapiens OX=9606 GN=TXNDC5 PE=1 SV=2
1369	3906	sp|O14556|G3PT_HUMAN	81.98	8	8	0	0	0	9380000				3	2	5	0	0	0	Carbamidomethylation; Oxidation (M)	44501	Glyceraldehyde-3-phosphate dehydrogenase testis-specific OS=Homo sapiens OX=9606 GN=GAPDHS PE=1 SV=2
1351	3746	tr|B0QZE2|B0QZE2_HUMAN	81.84	8	0	0	8	3			2700000	1530000	3	3	0	0	3	1	Oxidation (M)	61287	Zinc finger MYND domain-containing protein 11 OS=Homo sapiens OX=9606 GN=ZMYND11 PE=1 SV=1
1351	3747	tr|B7Z2J6|B7Z2J6_HUMAN	81.84	7	0	0	7	3			2700000	1530000	3	3	0	0	3	1	Oxidation (M)	64355	Zinc finger MYND domain-containing protein 11 OS=Homo sapiens OX=9606 GN=ZMYND11 PE=1 SV=1
1351	3748	sp|Q15326|ZMY11_HUMAN	81.84	7	0	0	7	2			2700000	1530000	3	3	0	0	3	1	Oxidation (M)	70963	Zinc finger MYND domain-containing protein 11 OS=Homo sapiens OX=9606 GN=ZMYND11 PE=1 SV=2
1351	3752	tr|A0A0A0MRY2|A0A0A0MRY2_HUMAN	81.84	9	0	0	9	3			2700000	1530000	3	3	0	0	3	1	Oxidation (M)	56527	Zinc finger MYND domain-containing protein 11 OS=Homo sapiens OX=9606 GN=ZMYND11 PE=1 SV=1
1351	3753	tr|J3QKD2|J3QKD2_HUMAN	81.84	7	0	0	7	2			2700000	1530000	3	3	0	0	3	1	Oxidation (M)	69017	Zinc finger MYND domain-containing protein 11 OS=Homo sapiens OX=9606 GN=ZMYND11 PE=1 SV=1
925	2822	tr|C9JAB2|C9JAB2_HUMAN	81.83	14	8	4	4	10	432000	240000	194000	305000	3	2	5	3	1	2		26928	Serine/arginine-rich-splicing factor 7 OS=Homo sapiens OX=9606 GN=SRSF7 PE=1 SV=1
925	2823	sp|Q16629|SRSF7_HUMAN	81.83	13	8	4	4	10	432000	240000	194000	305000	3	2	5	3	1	2		27367	Serine/arginine-rich splicing factor 7 OS=Homo sapiens OX=9606 GN=SRSF7 PE=1 SV=1
925	3032	tr|A0A0B4J1Z1|A0A0B4J1Z1_HUMAN	81.83	23	13	7	7	17	432000	240000	194000	305000	3	2	5	3	1	2		15763	Serine/arginine-rich-splicing factor 7 OS=Homo sapiens OX=9606 GN=SRSF7 PE=1 SV=1
1357	3547	sp|Q75N03|HAKAI_HUMAN	81.71	14	2	0	8	10			1830000	2960000	5	4	1	0	3	3	Carbamidomethylation	54519	E3 ubiquitin-protein ligase Hakai OS=Homo sapiens OX=9606 GN=CBLL1 PE=1 SV=1
1357	3558	tr|C9J2P9|C9J2P9_HUMAN	81.71	19	0	0	10	15			1830000	2960000	4	4	0	0	2	3	Carbamidomethylation	36301	E3 ubiquitin-protein ligase Hakai (Fragment) OS=Homo sapiens OX=9606 GN=CBLL1 PE=1 SV=8
922	2523	tr|J3QQW9|J3QQW9_HUMAN	81.62	5	0	0	5	4			1390000	568000	4	4	0	0	5	4		80322	Polycomb protein SUZ12 OS=Homo sapiens OX=9606 GN=SUZ12 PE=1 SV=1
922	2535	sp|Q15022|SUZ12_HUMAN	81.62	5	0	0	5	4			1390000	568000	4	4	0	0	5	4		83055	Polycomb protein SUZ12 OS=Homo sapiens OX=9606 GN=SUZ12 PE=1 SV=3
497	2871	tr|A0A087WTD7|A0A087WTD7_HUMAN	81.56	2	1	1	2	1	120000000	81500000	200000000	204000000	4	4	8	6	11	9		161184	A-kinase anchor protein 13 OS=Homo sapiens OX=9606 GN=AKAP13 PE=1 SV=1
497	2872	tr|A8MYJ1|A8MYJ1_HUMAN	81.56	2	1	1	2	1	120000000	81500000	200000000	204000000	4	4	8	6	11	9		161840	A-kinase anchor protein 13 OS=Homo sapiens OX=9606 GN=AKAP13 PE=1 SV=3
497	2910	sp|Q12802|AKP13_HUMAN	81.56	1	0	0	1	0	120000000	81500000	200000000	204000000	4	4	8	6	11	9		307550	A-kinase anchor protein 13 OS=Homo sapiens OX=9606 GN=AKAP13 PE=1 SV=2
756	2567	tr|A0A3B3IRL5|A0A3B3IRL5_HUMAN	81.19	10	2	2	8	3		26800	1190000		6	2	1	1	12	4	Deamidation (NQ)	54391	Inosine-5'-monophosphate dehydrogenase (Fragment) OS=Homo sapiens OX=9606 GN=IMPDH1 PE=1 SV=1
756	2568	tr|C9J381|C9J381_HUMAN	81.19	10	2	2	8	3		26800	1190000		6	2	1	1	12	4	Deamidation (NQ)	55278	Inosine-5'-monophosphate dehydrogenase OS=Homo sapiens OX=9606 GN=IMPDH1 PE=1 SV=1
756	2569	sp|P20839|IMDH1_HUMAN	81.19	10	2	2	8	3		26800	1190000		6	2	1	1	12	4	Deamidation (NQ)	55406	Inosine-5'-monophosphate dehydrogenase 1 OS=Homo sapiens OX=9606 GN=IMPDH1 PE=1 SV=2
832	2274	sp|Q13315|ATM_HUMAN	81.08	2	0	0	2	1			782000	568000	7	7	0	0	6	6	Deamidation (NQ)	350687	Serine-protein kinase ATM OS=Homo sapiens OX=9606 GN=ATM PE=1 SV=4
1180	2269	sp|Q9P0K7|RAI14_HUMAN	81.08	6	0	0	6	1			711000	29200	5	5	0	0	5	1		110041	Ankycorbin OS=Homo sapiens OX=9606 GN=RAI14 PE=1 SV=2
957	2169	sp|Q6NZY4|ZCHC8_HUMAN	80.7	11	0	0	4	8			1050000	1760000	7	7	0	0	4	6		78577	Zinc finger CCHC domain-containing protein 8 OS=Homo sapiens OX=9606 GN=ZCCHC8 PE=1 SV=2
1384	3529	sp|Q02383|SEMG2_HUMAN	80.56	8	0	8	0	0		216000			4	2	0	4	0	0		65445	Semenogelin-2 OS=Homo sapiens OX=9606 GN=SEMG2 PE=1 SV=1
1198	3366	tr|F5H365|F5H365_HUMAN	80.43	4	0	0	3	3			676000	312000	3	3	0	0	3	2	Carbamidomethylation; Oxidation (M)	82969	Protein transport protein SEC23 OS=Homo sapiens OX=9606 GN=SEC23A PE=1 SV=1
1198	3367	sp|Q15436|SC23A_HUMAN	80.43	4	0	0	3	3			676000	312000	3	3	0	0	3	2	Carbamidomethylation; Oxidation (M)	86161	Protein transport protein Sec23A OS=Homo sapiens OX=9606 GN=SEC23A PE=1 SV=2
815	3594	tr|A0A1B0GWJ6|A0A1B0GWJ6_HUMAN	80.29	10	0	0	10	5			1500000	0	3	1	0	0	10	4		36034	Unconventional myosin-XVIIIa (Fragment) OS=Homo sapiens OX=9606 GN=MYO18A PE=1 SV=1
1044	3724	sp|Q96N66|MBOA7_HUMAN	80.27	5	0	0	5	5			3850000	1990000	2	2	0	0	4	3		52765	Lysophospholipid acyltransferase 7 OS=Homo sapiens OX=9606 GN=MBOAT7 PE=1 SV=2
1287	3177	sp|Q15650|TRIP4_HUMAN	80.2	5	0	0	2	5			257000	1470000	3	3	0	0	1	3		66146	Activating signal cointegrator 1 OS=Homo sapiens OX=9606 GN=TRIP4 PE=1 SV=4
1260	3661	sp|Q8NHW5|RLA0L_HUMAN	80.07	12	7	0	9	9	286000		61700000	13000000	3	3	2	0	2	2		34364	60S acidic ribosomal protein P0-like OS=Homo sapiens OX=9606 GN=RPLP0P6 PE=5 SV=1
1260	4244	tr|F8VW21|F8VW21_HUMAN	80.07	9	9	0	5	5	286000		134000	136000	2	2	2	0	1	1		26901	60S acidic ribosomal protein P0 (Fragment) OS=Homo sapiens OX=9606 GN=RPLP0 PE=1 SV=1
1260	4440	tr|F8VPE8|F8VPE8_HUMAN	80.07	15	15	0	8	8	286000		134000	136000	2	2	2	0	1	1		16681	60S acidic ribosomal protein P0 (Fragment) OS=Homo sapiens OX=9606 GN=RPLP0 PE=1 SV=1
1260	4441	tr|G3V210|G3V210_HUMAN	80.07	14	14	0	7	7	286000		134000	136000	2	2	2	0	1	1		18270	60S acidic ribosomal protein P0 OS=Homo sapiens OX=9606 GN=RPLP0 PE=1 SV=1
1260	4442	tr|F8VU65|F8VU65_HUMAN	80.07	9	9	0	5	5	286000		134000	136000	2	2	2	0	1	1		27188	60S acidic ribosomal protein P0 (Fragment) OS=Homo sapiens OX=9606 GN=RPLP0 PE=1 SV=1
1260	4443	tr|F8VWS0|F8VWS0_HUMAN	80.07	8	8	0	4	4	286000		134000	136000	2	2	2	0	1	1		30456	60S acidic ribosomal protein P0 OS=Homo sapiens OX=9606 GN=RPLP0 PE=1 SV=1
1260	4444	sp|P05388|RLA0_HUMAN	80.07	7	7	0	4	4	286000		134000	136000	2	2	2	0	1	1		34274	60S acidic ribosomal protein P0 OS=Homo sapiens OX=9606 GN=RPLP0 PE=1 SV=1
948	2256	sp|Q9BTC0|DIDO1_HUMAN	80.01	3	0	0	3	2		384000	1600000	483000	6	6	0	1	6	4		243870	Death-inducer obliterator 1 OS=Homo sapiens OX=9606 GN=DIDO1 PE=1 SV=5
1017	2608	sp|P22735|TGM1_HUMAN	79.98	5	3	5	1	1	248000	160000	134000	106000	4	4	2	4	1	1		89787	Protein-glutamine gamma-glutamyltransferase K OS=Homo sapiens OX=9606 GN=TGM1 PE=1 SV=4
893	3126	sp|P26373|RL13_HUMAN	79.96	18	8	8	13	9	615000	68500	3950000	551000	4	4	4	2	3	3		24261	60S ribosomal protein L13 OS=Homo sapiens OX=9606 GN=RPL13 PE=1 SV=4
893	3279	tr|J3QSB4|J3QSB4_HUMAN	79.96	22	13	13	13	15	615000	68500	515000	551000	3	3	4	2	2	3		14692	60S ribosomal protein L13 (Fragment) OS=Homo sapiens OX=9606 GN=RPL13 PE=1 SV=1
1223	3093	sp|P23497|SP100_HUMAN	79.73	5	0	2	1	3		33300	131000	930000	4	4	0	2	1	3	Carbamidomethylation	100417	Nuclear autoantigen Sp-100 OS=Homo sapiens OX=9606 GN=SP100 PE=1 SV=3
1223	3128	tr|E9PHV6|E9PHV6_HUMAN	79.73	6	0	0	2	6			131000	930000	3	3	0	0	1	3		50904	Nuclear autoantigen Sp-100 OS=Homo sapiens OX=9606 GN=SP100 PE=1 SV=1
1223	3159	tr|C9JBL0|C9JBL0_HUMAN	79.73	15	0	0	5	15			131000	930000	3	3	0	0	1	3		21867	Nuclear autoantigen Sp-100 (Fragment) OS=Homo sapiens OX=9606 GN=SP100 PE=1 SV=8
1265	3739	tr|A0A1W2PR68|A0A1W2PR68_HUMAN	79.7	4	0	2	4	2		50200	498000	291000	2	2	0	1	3	1		59898	Malic enzyme OS=Homo sapiens OX=9606 GN=ME2 PE=1 SV=1
1265	3740	tr|A0A1W2PPH1|A0A1W2PPH1_HUMAN	79.7	4	0	1	4	1		50200	498000	291000	2	2	0	1	3	1		61222	Malic enzyme OS=Homo sapiens OX=9606 GN=ME2 PE=1 SV=1
1265	3742	sp|P23368|MAOM_HUMAN	79.7	4	0	1	4	1		50200	498000	291000	2	2	0	1	3	1		65444	NAD-dependent malic enzyme mitochondrial OS=Homo sapiens OX=9606 GN=ME2 PE=1 SV=1
1265	3744	tr|A0A1W2PQT3|A0A1W2PQT3_HUMAN	79.7	4	0	1	4	1		50200	498000	291000	2	2	0	1	3	1		59787	Malic enzyme OS=Homo sapiens OX=9606 GN=ME2 PE=1 SV=1
1265	3745	tr|A0A1W2PQY8|A0A1W2PQY8_HUMAN	79.7	4	0	1	4	1		50200	498000	291000	2	2	0	1	3	1		62883	Malic enzyme OS=Homo sapiens OX=9606 GN=ME2 PE=1 SV=1
1265	3766	tr|A0A1W2PQH3|A0A1W2PQH3_HUMAN	79.7	4	0	1	4	1		50200	498000	291000	2	2	0	1	3	1		61258	Malic enzyme OS=Homo sapiens OX=9606 GN=ME2 PE=1 SV=1
1541	3982	tr|J3QLD9|J3QLD9_HUMAN	79.62	9	9	0	0	0	307000				3	3	3	0	0	0		47142	Flotillin-2 OS=Homo sapiens OX=9606 GN=FLOT2 PE=1 SV=1
1541	3983	tr|E7EMK3|E7EMK3_HUMAN	79.62	8	8	0	0	0	307000				3	3	3	0	0	0		53137	Flotillin-2 OS=Homo sapiens OX=9606 GN=FLOT2 PE=1 SV=1
1541	3996	sp|Q14254|FLOT2_HUMAN	79.62	9	9	0	0	0	307000				3	3	3	0	0	0		47064	Flotillin-2 OS=Homo sapiens OX=9606 GN=FLOT2 PE=1 SV=2
735	2585	sp|P05089|ARGI1_HUMAN	79.49	16	13	12	9	9	412000	751000	2390000	2690000	5	5	4	4	4	6	Oxidation (M)	34735	Arginase-1 OS=Homo sapiens OX=9606 GN=ARG1 PE=1 SV=2
1093	2981	tr|F8VUA7|F8VUA7_HUMAN	79.48	4	0	0	3	3			609000	141000	3	2	0	0	3	3		79053	Oxysterol-binding protein (Fragment) OS=Homo sapiens OX=9606 GN=OSBPL8 PE=1 SV=8
1093	2982	tr|F8VQX7|F8VQX7_HUMAN	79.48	4	0	0	3	3			609000	141000	3	2	0	0	3	3		81657	Oxysterol-binding protein (Fragment) OS=Homo sapiens OX=9606 GN=OSBPL8 PE=1 SV=1
1093	2986	sp|Q9BZF1|OSBL8_HUMAN	79.48	3	0	0	2	3			609000	141000	3	2	0	0	3	3		101196	Oxysterol-binding protein-related protein 8 OS=Homo sapiens OX=9606 GN=OSBPL8 PE=1 SV=3
1377	2888	sp|P53355|DAPK1_HUMAN	79.27	3	0	0	3	0			803000		4	4	0	0	4	0		160045	Death-associated protein kinase 1 OS=Homo sapiens OX=9606 GN=DAPK1 PE=1 SV=6
1244	2721	tr|A0A1B0GTJ4|A0A1B0GTJ4_HUMAN	79.12	10	0	0	7	3			549000	299000	5	5	0	0	4	1		53911	Alpha-aminoadipic semialdehyde dehydrogenase OS=Homo sapiens OX=9606 GN=ALDH7A1 PE=1 SV=1
1244	2722	tr|A0A1B0GTG2|A0A1B0GTG2_HUMAN	79.12	10	0	0	7	3			549000	299000	5	5	0	0	4	1		58140	Alpha-aminoadipic semialdehyde dehydrogenase OS=Homo sapiens OX=9606 GN=ALDH7A1 PE=1 SV=1
1244	2723	sp|P49419|AL7A1_HUMAN	79.12	9	0	0	7	3			549000	299000	5	5	0	0	4	1		58487	Alpha-aminoadipic semialdehyde dehydrogenase OS=Homo sapiens OX=9606 GN=ALDH7A1 PE=1 SV=5
1244	2724	tr|A0A1B0GW77|A0A1B0GW77_HUMAN	79.12	9	0	0	7	3			549000	299000	5	5	0	0	4	1		60033	Alpha-aminoadipic semialdehyde dehydrogenase OS=Homo sapiens OX=9606 GN=ALDH7A1 PE=1 SV=1
1244	2736	tr|A0A1B0GUA1|A0A1B0GUA1_HUMAN	79.12	10	0	0	7	3			549000	299000	5	5	0	0	4	1		56466	Alpha-aminoadipic semialdehyde dehydrogenase OS=Homo sapiens OX=9606 GN=ALDH7A1 PE=1 SV=1
1244	2737	tr|A0A1B0GW82|A0A1B0GW82_HUMAN	79.12	9	0	0	7	3			549000	299000	5	5	0	0	4	1		59364	Alpha-aminoadipic semialdehyde dehydrogenase (Fragment) OS=Homo sapiens OX=9606 GN=ALDH7A1 PE=1 SV=1
1244	2742	tr|A0A1B0GV49|A0A1B0GV49_HUMAN	79.12	11	0	0	8	3			549000	299000	5	5	0	0	4	1		50972	Alpha-aminoadipic semialdehyde dehydrogenase OS=Homo sapiens OX=9606 GN=ALDH7A1 PE=1 SV=1
1244	2794	tr|A0A1B0GTY9|A0A1B0GTY9_HUMAN	79.12	7	0	0	4	3			349000	299000	4	4	0	0	3	1		51854	Alpha-aminoadipic semialdehyde dehydrogenase OS=Homo sapiens OX=9606 GN=ALDH7A1 PE=1 SV=1
1640	4092	tr|J3QL01|J3QL01_HUMAN	79.12	37	37	0	0	0	543000				2	2	2	0	0	0		7977	60S ribosomal protein L38 OS=Homo sapiens OX=9606 GN=RPL38 PE=1 SV=1
1640	4449	tr|J3KT73|J3KT73_HUMAN	79.12	39	39	0	0	0	543000				2	2	2	0	0	0		7565	60S ribosomal protein L38 OS=Homo sapiens OX=9606 GN=RPL38 PE=1 SV=1
1640	4450	sp|P63173|RL38_HUMAN	79.12	36	36	0	0	0	543000				2	2	2	0	0	0		8218	60S ribosomal protein L38 OS=Homo sapiens OX=9606 GN=RPL38 PE=1 SV=2
1024	2415	sp|O00139|KIF2A_HUMAN	79.1	7	0	0	7	2			968000	305000	4	4	0	0	5	2		79955	Kinesin-like protein KIF2A OS=Homo sapiens OX=9606 GN=KIF2A PE=1 SV=3
976	3012	tr|Q5VVL7|Q5VVL7_HUMAN	78.79	23	4	23	0	0	105000	1840000			7	7	1	8	0	0	Oxidation (M)	36238	Dihydrolipoamide acetyltransferase component of pyruvate dehydrogenase complex OS=Homo sapiens OX=9606 GN=DBT PE=1 SV=1
976	3014	sp|P11182|ODB2_HUMAN	78.79	15	2	15	0	0	105000	1840000			7	7	1	8	0	0	Oxidation (M)	53487	Lipoamide acyltransferase component of branched-chain alpha-keto acid dehydrogenase complex mitochondrial OS=Homo sapiens OX=9606 GN=DBT PE=1 SV=3
1080	2378	sp|P06737|PYGL_HUMAN	78.59	5	1	0	5	2			177000		5	2	1	0	5	2		97149	Glycogen phosphorylase liver form OS=Homo sapiens OX=9606 GN=PYGL PE=1 SV=4
1080	2425	tr|E9PK47|E9PK47_HUMAN	78.59	6	1	0	6	2			177000		5	2	1	0	5	2		94070	Alpha-1 4 glucan phosphorylase OS=Homo sapiens OX=9606 GN=PYGL PE=1 SV=1
1028	3129	sp|Q8NFW8|NEUA_HUMAN	78.49	13	2	2	11	3	45500	55800	1490000	810000	5	5	1	1	5	2	Carbamidomethylation	48379	N-acylneuraminate cytidylyltransferase OS=Homo sapiens OX=9606 GN=CMAS PE=1 SV=2
1424	2964	sp|Q6UX06|OLFM4_HUMAN	78.33	7	0	0	0	7				571000	3	3	0	0	0	3		57280	Olfactomedin-4 OS=Homo sapiens OX=9606 GN=OLFM4 PE=1 SV=1
1133	2788	sp|Q96T23|RSF1_HUMAN	78.27	3	0	0	3	2			764000	1130000	3	3	0	0	3	2		163820	Remodeling and spacing factor 1 OS=Homo sapiens OX=9606 GN=RSF1 PE=1 SV=2
1133	2789	tr|H0YCN2|H0YCN2_HUMAN	78.27	5	0	0	5	4			764000	1130000	3	3	0	0	3	2		90739	Remodeling and spacing factor 1 (Fragment) OS=Homo sapiens OX=9606 GN=RSF1 PE=1 SV=1
1069	3135	sp|Q6PKG0|LARP1_HUMAN	78.11	4	0	0	4	2			2720000	1060000	4	4	0	0	6	4	Carbamidomethylation	123510	La-related protein 1 OS=Homo sapiens OX=9606 GN=LARP1 PE=1 SV=2
1075	2773	sp|Q9Y6D5|BIG2_HUMAN	78.06	2	0	0	2	1	8010000	7160000	845000	850000	4	4	1	2	4	2	Deamidation (NQ)	202037	Brefeldin A-inhibited guanine nucleotide-exchange protein 2 OS=Homo sapiens OX=9606 GN=ARFGEF2 PE=1 SV=3
1525	3713	tr|A8MVZ9|A8MVZ9_HUMAN	77.75	9	9	0	0	0	0				2	1	2	0	0	0		36295	Fructose-bisphosphate aldolase OS=Homo sapiens OX=9606 GN=ALDOC PE=1 SV=1
1525	3714	sp|P09972|ALDOC_HUMAN	77.75	8	8	0	0	0	0				2	1	2	0	0	0		39456	Fructose-bisphosphate aldolase C OS=Homo sapiens OX=9606 GN=ALDOC PE=1 SV=2
1231	2127	sp|Q9NVH2|INT7_HUMAN	77.66	7	0	0	6	2			554000	249000	7	6	0	0	5	3	Carbamidomethylation	106834	Integrator complex subunit 7 OS=Homo sapiens OX=9606 GN=INTS7 PE=1 SV=1
983	3119	sp|P26196|DDX6_HUMAN	77.64	9	9	6	5	2	412000	269000	341000	194000	3	3	3	2	2	1		54417	Probable ATP-dependent RNA helicase DDX6 OS=Homo sapiens OX=9606 GN=DDX6 PE=1 SV=2
1073	2107	sp|Q68CZ2|TENS3_HUMAN	77.27	6	0	0	4	4			968000	616000	6	6	0	0	5	3		155265	Tensin-3 OS=Homo sapiens OX=9606 GN=TNS3 PE=1 SV=2
1091	2550	sp|Q13469|NFAC2_HUMAN	77.21	7	0	0	4	4			738000	420000	5	5	0	0	3	3	Carbamidomethylation; Deamidation (NQ)	100146	Nuclear factor of activated T-cells cytoplasmic 2 OS=Homo sapiens OX=9606 GN=NFATC2 PE=1 SV=2
1437	3528	sp|Q86U42|PABP2_HUMAN	77.19	11	0	0	11	5			2310000	214000	3	3	0	0	3	1	Carbamidomethylation; Acetylation (Protein N-term)	32749	Polyadenylate-binding protein 2 OS=Homo sapiens OX=9606 GN=PABPN1 PE=1 SV=3
933	4037	sp|A0A075B6S2|KVD29_HUMAN	77.06	17	17	17	11	17	3900000	4510000	503000	769000	2	2	3	3	1	2		13143	Immunoglobulin kappa variable 2D-29 OS=Homo sapiens OX=9606 GN=IGKV2D-29 PE=3 SV=1
933	4038	sp|A2NJV5|KV229_HUMAN	77.06	17	17	17	11	17	3900000	4510000	503000	769000	2	2	3	3	1	2		13085	Immunoglobulin kappa variable 2-29 OS=Homo sapiens OX=9606 GN=IGKV2-29 PE=3 SV=2
933	4498	sp|A0A0A0MRZ7|KVD26_HUMAN	77.06	17	17	17	11	17	3900000	4510000	503000	769000	2	2	3	3	1	2		13297	Immunoglobulin kappa variable 2D-26 OS=Homo sapiens OX=9606 GN=IGKV2D-26 PE=3 SV=1
1126	4454	tr|B8ZZQ6|B8ZZQ6_HUMAN	76.96	22	13	22	0	0	750000	714000			2	2	2	4	0	0	Acetylation (Protein N-term)	11759	Prothymosin alpha OS=Homo sapiens OX=9606 GN=PTMA PE=1 SV=1
1126	4455	sp|P06454|PTMA_HUMAN	76.96	22	13	22	0	0	750000	714000			2	2	2	4	0	0	Acetylation (Protein N-term)	12203	Prothymosin alpha OS=Homo sapiens OX=9606 GN=PTMA PE=1 SV=2
1220	2779	sp|O14776|TCRG1_HUMAN	76.52	3	0	0	3	1			1320000	111000	4	4	0	0	7	2	Carbamidomethylation	123901	Transcription elongation regulator 1 OS=Homo sapiens OX=9606 GN=TCERG1 PE=1 SV=2
1199	3417	tr|A0A0C4DH47|A0A0C4DH47_HUMAN	76.49	6	0	0	6	2			1930000	380000	3	3	0	0	4	1		65764	Thromboxane-A synthase OS=Homo sapiens OX=9606 GN=TBXAS1 PE=1 SV=1
1199	3426	tr|A0A0A0MSK3|A0A0A0MSK3_HUMAN	76.49	8	0	0	8	2			1930000	380000	3	3	0	0	4	1		52418	HCG14925 isoform CRA_b OS=Homo sapiens OX=9606 GN=TBXAS1 PE=1 SV=1
1199	3427	sp|P24557|THAS_HUMAN	76.49	7	0	0	7	2			1930000	380000	3	3	0	0	4	1		60518	Thromboxane-A synthase OS=Homo sapiens OX=9606 GN=TBXAS1 PE=1 SV=3
1199	3428	tr|Q53F23|Q53F23_HUMAN	76.49	7	0	0	7	2			1930000	380000	3	3	0	0	4	1		60650	HCG14925 isoform CRA_a (Fragment) OS=Homo sapiens OX=9606 GN=TBXAS1 PE=1 SV=1
1181	2475	tr|A0A2U3TZY2|A0A2U3TZY2_HUMAN	76.44	8	0	0	5	4			1460000	1350000	4	4	0	0	3	2		76853	Caseinolytic peptidase B protein homolog OS=Homo sapiens OX=9606 GN=CLPB PE=1 SV=1
1181	2476	sp|Q9H078|CLPB_HUMAN	76.44	7	0	0	5	4			1460000	1350000	4	4	0	0	3	2		78729	Caseinolytic peptidase B protein homolog OS=Homo sapiens OX=9606 GN=CLPB PE=1 SV=1
974	3133	tr|M0R210|M0R210_HUMAN	76.39	40	40	8	8	8	1810000	53500	642000	550000	5	5	5	1	2	2		14419	40S ribosomal protein S16 OS=Homo sapiens OX=9606 GN=RPS16 PE=1 SV=1
974	3134	sp|P62249|RS16_HUMAN	76.39	35	35	7	7	7	1810000	53500	642000	550000	5	5	5	1	2	2		16445	40S ribosomal protein S16 OS=Homo sapiens OX=9606 GN=RPS16 PE=1 SV=2
1162	3771	sp|Q6UWP8|SBSN_HUMAN	76.37	6	6	3	0	0	305000	172000			2	2	4	1	0	0		60541	Suprabasin OS=Homo sapiens OX=9606 GN=SBSN PE=1 SV=2
1144	3161	tr|F2Z2X4|F2Z2X4_HUMAN	76.34	3	0	0	3	2			487000	169000	3	2	0	0	5	3		130153	Exportin-4 OS=Homo sapiens OX=9606 GN=XPO4 PE=1 SV=1
1144	3166	sp|Q9C0E2|XPO4_HUMAN	76.34	3	0	0	3	2			487000	169000	3	2	0	0	5	3		130139	Exportin-4 OS=Homo sapiens OX=9606 GN=XPO4 PE=1 SV=2
1112	2658	sp|Q6ZMZ3|SYNE3_HUMAN	76.28	4	0	0	4	1			461000	60200	4	4	0	0	4	2		112216	Nesprin-3 OS=Homo sapiens OX=9606 GN=SYNE3 PE=1 SV=2
1252	2468	sp|P10398|ARAF_HUMAN	76.17	10	0	0	2	8			918000	1070000	6	5	0	0	2	4	Carbamidomethylation; Deamidation (NQ)	67585	Serine/threonine-protein kinase A-Raf OS=Homo sapiens OX=9606 GN=ARAF PE=1 SV=2
1252	2469	tr|Q96II5|Q96II5_HUMAN	76.17	10	0	0	2	8			918000	1070000	6	5	0	0	2	4	Carbamidomethylation; Deamidation (NQ)	67926	ARAF protein OS=Homo sapiens OX=9606 GN=ARAF PE=1 SV=1
1078	2264	sp|O60763|USO1_HUMAN	76.1	7	0	0	7	1			1420000	207000	6	6	0	0	6	1		107895	General vesicular transport factor p115 OS=Homo sapiens OX=9606 GN=USO1 PE=1 SV=2
1081	2450	sp|P05023|AT1A1_HUMAN	76.07	6	0	0	6	1			2340000	154000	5	5	0	0	8	1	Carbamidomethylation; Deamidation (NQ)	112896	Sodium/potassium-transporting ATPase subunit alpha-1 OS=Homo sapiens OX=9606 GN=ATP1A1 PE=1 SV=1
1261	2746	sp|Q15365|PCBP1_HUMAN	76.05	14	4	0	7	7	273000		72600	441000	4	3	1	0	2	3	Carbamidomethylation	37498	Poly(rC)-binding protein 1 OS=Homo sapiens OX=9606 GN=PCBP1 PE=1 SV=2
1266	4117	tr|A0A0U1RRL5|A0A0U1RRL5_HUMAN	75.89	5	0	0	5	5			376000	331000	2	2	0	0	3	3		67053	ETS-related transcription factor Elf-1 (Fragment) OS=Homo sapiens OX=9606 GN=ELF1 PE=1 SV=1
1266	4118	sp|P32519|ELF1_HUMAN	75.89	5	0	0	5	5			376000	331000	2	2	0	0	3	3		67498	ETS-related transcription factor Elf-1 OS=Homo sapiens OX=9606 GN=ELF1 PE=1 SV=2
1092	2647	sp|P62424|RL7A_HUMAN	75.86	16	11	4	4	9	188000	0	331000	395000	4	4	4	1	1	2		29996	60S ribosomal protein L7a OS=Homo sapiens OX=9606 GN=RPL7A PE=1 SV=2
1083	2649	sp|P10515|ODP2_HUMAN	75.83	7	3	2	0	5	93800	171000		1730000	5	5	3	2	0	3	Carbamidomethylation	68997	Dihydrolipoyllysine-residue acetyltransferase component of pyruvate dehydrogenase complex mitochondrial OS=Homo sapiens OX=9606 GN=DLAT PE=1 SV=3
1083	2651	tr|H0YDD4|H0YDD4_HUMAN	75.83	10	4	3	0	6	93800	171000		1730000	5	5	3	2	0	3	Carbamidomethylation	51201	Acetyltransferase component of pyruvate dehydrogenase complex (Fragment) OS=Homo sapiens OX=9606 GN=DLAT PE=1 SV=1
1102	2720	sp|O60231|DHX16_HUMAN	75.79	5	0	0	3	4			581000	310000	4	4	0	0	3	3		119263	Pre-mRNA-splicing factor ATP-dependent RNA helicase DHX16 OS=Homo sapiens OX=9606 GN=DHX16 PE=1 SV=2
1102	2763	tr|A0A140T947|A0A140T947_HUMAN	75.79	7	0	0	5	6			581000	310000	4	4	0	0	3	3		76933	Pre-mRNA-splicing factor ATP-dependent RNA helicase DHX16 (Fragment) OS=Homo sapiens OX=9606 GN=DHX16 PE=1 SV=1
999	2609	tr|M0R0P9|M0R0P9_HUMAN	75.73	9	0	0	9	4			852000		4	2	0	0	8	2	Carbamidomethylation	51571	Non-specific serine/threonine protein kinase OS=Homo sapiens OX=9606 GN=AKT2 PE=1 SV=1
999	2611	sp|P31751|AKT2_HUMAN	75.73	9	0	0	9	3			852000		4	2	0	0	8	2	Carbamidomethylation	55769	RAC-beta serine/threonine-protein kinase OS=Homo sapiens OX=9606 GN=AKT2 PE=1 SV=2
1519	3600	sp|Q15554|TERF2_HUMAN	75.62	6	0	0	0	6				568000	3	3	0	0	0	3		59594	Telomeric repeat-binding factor 2 OS=Homo sapiens OX=9606 GN=TERF2 PE=1 SV=3
1519	3979	tr|H3BR06|H3BR06_HUMAN	75.62	8	0	0	0	8				477000	2	2	0	0	0	2		31503	Telomeric repeat-binding factor 2 (Fragment) OS=Homo sapiens OX=9606 GN=TERF2 PE=1 SV=1
1519	4227	tr|U3KQ35|U3KQ35_HUMAN	75.62	10	0	0	0	10				477000	2	2	0	0	0	2		26782	Telomeric repeat-binding factor 2 (Fragment) OS=Homo sapiens OX=9606 GN=TERF2 PE=1 SV=1
992	2147	sp|P46100|ATRX_HUMAN	75.53	4	0	0	3	2			1300000	1180000	10	9	0	1	8	5	Oxidation (M)	282584	Transcriptional regulator ATRX OS=Homo sapiens OX=9606 GN=ATRX PE=1 SV=5
1063	2543	tr|F5H5P4|F5H5P4_HUMAN	75.36	6	0	0	5	5			1790000	1040000	5	5	0	0	4	4	Carbamidomethylation	91730	Proto-oncogene vav OS=Homo sapiens OX=9606 GN=VAV1 PE=1 SV=2
1063	2544	tr|Q96D37|Q96D37_HUMAN	75.36	6	0	0	5	5			1790000	1040000	5	5	0	0	4	4	Carbamidomethylation	91991	Proto-oncogene vav OS=Homo sapiens OX=9606 GN=VAV1 PE=1 SV=2
1063	2552	sp|P15498|VAV_HUMAN	75.36	6	0	0	5	4			1790000	1040000	5	5	0	0	4	4	Carbamidomethylation	98314	Proto-oncogene vav OS=Homo sapiens OX=9606 GN=VAV1 PE=1 SV=4
1063	2626	tr|A0A0A0MR07|A0A0A0MR07_HUMAN	75.36	4	0	0	3	4			1770000	1040000	4	4	0	0	3	4	Carbamidomethylation	95756	Proto-oncogene vav OS=Homo sapiens OX=9606 GN=VAV1 PE=1 SV=1
1173	3039	sp|P48651|PTSS1_HUMAN	75.3	8	0	0	6	8			268000	526000	3	3	0	0	2	4		55528	Phosphatidylserine synthase 1 OS=Homo sapiens OX=9606 GN=PTDSS1 PE=1 SV=1
1020	2711	sp|Q14185|DOCK1_HUMAN	75.24	3	0	0	3	1			648000	134000	5	4	0	0	5	4		215344	Dedicator of cytokinesis protein 1 OS=Homo sapiens OX=9606 GN=DOCK1 PE=1 SV=2
1020	2712	tr|A0A096LNH6|A0A096LNH6_HUMAN	75.24	3	0	0	3	1			648000	134000	5	4	0	0	5	4		217751	Dedicator of cytokinesis protein 1 OS=Homo sapiens OX=9606 GN=DOCK1 PE=1 SV=1
975	2161	sp|Q9Y6K5|OAS3_HUMAN	75.23	6	0	0	5	3			1060000	118000	6	6	0	0	5	3	Acetylation (Protein N-term); Oxidation (M)	121170	2'-5'-oligoadenylate synthase 3 OS=Homo sapiens OX=9606 GN=OAS3 PE=1 SV=3
1205	4219	tr|H0YKU1|H0YKU1_HUMAN	75.19	10	0	6	10	10		110000	588000	220000	2	2	0	1	3	2		20910	Tropomodulin-3 (Fragment) OS=Homo sapiens OX=9606 GN=TMOD3 PE=1 SV=1
1205	4220	tr|H0YNJ8|H0YNJ8_HUMAN	75.19	9	0	5	9	9		110000	588000	220000	2	2	0	1	3	2		23812	Tropomodulin-3 OS=Homo sapiens OX=9606 GN=TMOD3 PE=1 SV=1
1205	4222	sp|Q9NYL9|TMOD3_HUMAN	75.19	5	0	3	5	5		110000	588000	220000	2	2	0	1	3	2		39595	Tropomodulin-3 OS=Homo sapiens OX=9606 GN=TMOD3 PE=1 SV=1
971	3074	tr|J3QLV6|J3QLV6_HUMAN	74.89	6	0	0	6	2			19300000	0	3	1	0	0	8	1	Carbamidomethylation; Oxidation (M); Deamidation (NQ)	48284	Coronin OS=Homo sapiens OX=9606 GN=CORO6 PE=1 SV=1
971	3076	tr|J3KSS5|J3KSS5_HUMAN	74.89	6	0	0	6	2			19300000	0	3	1	0	0	8	1	Carbamidomethylation; Oxidation (M); Deamidation (NQ)	52634	Coronin OS=Homo sapiens OX=9606 GN=CORO6 PE=1 SV=1
971	3077	sp|Q6QEF8|CORO6_HUMAN	74.89	6	0	0	6	2			19300000	0	3	1	0	0	8	1	Carbamidomethylation; Oxidation (M); Deamidation (NQ)	52762	Coronin-6 OS=Homo sapiens OX=9606 GN=CORO6 PE=1 SV=2
1340	3079	sp|P00367|DHE3_HUMAN	74.79	13	1	12	0	0	80600	3850000			6	6	1	6	0	0		61398	Glutamate dehydrogenase 1 mitochondrial OS=Homo sapiens OX=9606 GN=GLUD1 PE=1 SV=2
1033	2748	sp|O43747|AP1G1_HUMAN	74.71	5	0	0	3	5			898000	751000	4	4	0	0	4	5		91351	AP-1 complex subunit gamma-1 OS=Homo sapiens OX=9606 GN=AP1G1 PE=1 SV=5
1172	2866	sp|Q8WUM0|NU133_HUMAN	74.63	5	0	0	5	1			713000	222000	5	5	0	0	7	1		128979	Nuclear pore complex protein Nup133 OS=Homo sapiens OX=9606 GN=NUP133 PE=1 SV=2
1273	2705	tr|H0YEN5|H0YEN5_HUMAN	74.61	27	27	0	0	6	1310000			350000	5	5	5	0	0	1	Carbamidomethylation	21154	40S ribosomal protein S2 (Fragment) OS=Homo sapiens OX=9606 GN=RPS2 PE=1 SV=1
1273	2706	sp|P15880|RS2_HUMAN	74.61	18	18	0	0	4	1310000			350000	5	5	5	0	0	1	Carbamidomethylation	31324	40S ribosomal protein S2 OS=Homo sapiens OX=9606 GN=RPS2 PE=1 SV=2
1558	3582	sp|Q96LT9|RNPC3_HUMAN	74.51	7	0	0	0	7				1650000	3	3	0	0	0	3		58575	RNA-binding region-containing protein 3 OS=Homo sapiens OX=9606 GN=RNPC3 PE=1 SV=1
1142	3081	tr|H3BLV9|H3BLV9_HUMAN	74.42	6	0	0	5	5			501000	307000	4	2	0	0	3	4		76040	SRSF protein kinase 1 (Fragment) OS=Homo sapiens OX=9606 GN=SRPK1 PE=1 SV=1
1142	3082	sp|Q96SB4|SRPK1_HUMAN	74.42	6	0	0	5	5			501000	307000	4	2	0	0	3	4		74325	SRSF protein kinase 1 OS=Homo sapiens OX=9606 GN=SRPK1 PE=1 SV=2
1320	3785	tr|G5E9L0|G5E9L0_HUMAN	73.92	6	0	0	3	6			168000	129000	2	2	0	0	1	2	Acetylation (Protein N-term)	53477	ADP-ribosylation factor GTPase-activating protein 2 OS=Homo sapiens OX=9606 GN=ARFGAP2 PE=1 SV=2
1320	3786	sp|Q8N6H7|ARFG2_HUMAN	73.92	6	0	0	3	6			168000	129000	2	2	0	0	1	2	Acetylation (Protein N-term)	56720	ADP-ribosylation factor GTPase-activating protein 2 OS=Homo sapiens OX=9606 GN=ARFGAP2 PE=1 SV=1
1320	3787	tr|A0A0D9SF70|A0A0D9SF70_HUMAN	73.92	8	0	0	4	8			168000	129000	2	2	0	0	1	2	Acetylation (Protein N-term)	42153	ADP-ribosylation factor GTPase-activating protein 2 OS=Homo sapiens OX=9606 GN=ARFGAP2 PE=1 SV=1
1320	3922	tr|E9PQP3|E9PQP3_HUMAN	73.92	12	0	0	5	12			168000	129000	2	2	0	0	1	2	Acetylation (Protein N-term)	30597	ADP-ribosylation factor GTPase-activating protein 2 (Fragment) OS=Homo sapiens OX=9606 GN=ARFGAP2 PE=1 SV=1
1034	2762	tr|H3BSZ2|H3BSZ2_HUMAN	73.79	12	1	0	11	11	1900000		2400000	3740000	6	6	1	0	4	5		53206	PR domain-containing protein 11 (Fragment) OS=Homo sapiens OX=9606 GN=PRDM11 PE=1 SV=1
1156	3033	sp|Q9UHD8|SEPT9_HUMAN	73.54	6	2	0	2	6	32300		561000	7650000	3	3	1	0	1	3		65402	Septin-9 OS=Homo sapiens OX=9606 GN=SEPT9 PE=1 SV=2
1082	2619	sp|P11216|PYGB_HUMAN	73.54	5	1	0	5	4			79500	65000	4	1	1	0	4	3		96696	Glycogen phosphorylase brain form OS=Homo sapiens OX=9606 GN=PYGB PE=1 SV=5
1419	4031	sp|Q52LJ0|FA98B_HUMAN	73.46	9	3	6	0	3	29700	216000		249000	3	3	1	2	0	1		37191	Protein FAM98B OS=Homo sapiens OX=9606 GN=FAM98B PE=1 SV=1
1257	3373	tr|C9JY79|C9JY79_HUMAN	73.15	1	0	0	1	0					3	0	0	0	3	1	Carbamidomethylation; Oxidation (M)	289060	Spectrin beta chain OS=Homo sapiens OX=9606 GN=SPTBN4 PE=1 SV=2
1257	3374	sp|Q9H254|SPTN4_HUMAN	73.15	1	0	0	1	0					3	0	0	0	3	1	Carbamidomethylation; Oxidation (M)	288984	Spectrin beta chain non-erythrocytic 4 OS=Homo sapiens OX=9606 GN=SPTBN4 PE=1 SV=2
1257	3379	tr|M0QZQ3|M0QZQ3_HUMAN	73.15	1	0	0	1	1					3	0	0	0	3	1	Carbamidomethylation; Oxidation (M)	225488	Spectrin beta chain OS=Homo sapiens OX=9606 GN=SPTBN4 PE=1 SV=1
1392	3233	sp|P32189|GLPK_HUMAN	73.14	7	0	0	7	2			711000	130000	3	3	0	0	3	1		61245	Glycerol kinase OS=Homo sapiens OX=9606 GN=GK PE=1 SV=3
1188	2558	sp|Q5JTZ9|SYAM_HUMAN	72.98	5	0	0	5	1			251000	38200	4	4	0	0	5	1		107340	Alanine--tRNA ligase mitochondrial OS=Homo sapiens OX=9606 GN=AARS2 PE=1 SV=1
928	2418	sp|Q9Y5L0|TNPO3_HUMAN	72.88	6	0	0	6	2			1930000	260000	5	5	0	0	8	2	Carbamidomethylation	104203	Transportin-3 OS=Homo sapiens OX=9606 GN=TNPO3 PE=1 SV=3
928	2423	tr|C9J7E5|C9J7E5_HUMAN	72.88	5	0	0	5	2			1930000	260000	5	5	0	0	8	2	Carbamidomethylation	108048	Transportin-3 OS=Homo sapiens OX=9606 GN=TNPO3 PE=1 SV=1
1022	2672	sp|Q5T160|SYRM_HUMAN	72.8	9	0	0	9	6			1980000	1060000	5	5	0	0	7	4		65505	Probable arginine--tRNA ligase mitochondrial OS=Homo sapiens OX=9606 GN=RARS2 PE=1 SV=1
1171	2808	tr|D6RAF2|D6RAF2_HUMAN	72.54	7	0	0	5	4			733000	417000	3	3	0	0	2	3	Deamidation (NQ)	51055	Poly(A) RNA polymerase GLD2 OS=Homo sapiens OX=9606 GN=TENT2 PE=1 SV=1
1171	2809	sp|Q6PIY7|GLD2_HUMAN	72.54	7	0	0	5	4			733000	417000	3	3	0	0	2	3	Deamidation (NQ)	56028	Poly(A) RNA polymerase GLD2 OS=Homo sapiens OX=9606 GN=TENT2 PE=1 SV=1
1218	2629	tr|C9J406|C9J406_HUMAN	72.37	8	0	0	5	4			2010000	1740000	5	5	0	0	4	3		73254	MICOS complex subunit MIC60 OS=Homo sapiens OX=9606 GN=IMMT PE=1 SV=1
1218	2631	tr|B9A067|B9A067_HUMAN	72.37	7	0	0	5	4			2010000	1740000	5	5	0	0	4	3		78974	MICOS complex subunit MIC60 OS=Homo sapiens OX=9606 GN=IMMT PE=1 SV=2
1218	2632	sp|Q16891|MIC60_HUMAN	72.37	7	0	0	4	4			2010000	1740000	5	5	0	0	4	3		83678	MICOS complex subunit MIC60 OS=Homo sapiens OX=9606 GN=IMMT PE=1 SV=1
1218	2670	tr|H7C463|H7C463_HUMAN	72.37	7	0	0	6	3			2010000	1520000	4	4	0	0	4	2		68184	MICOS complex subunit MIC60 (Fragment) OS=Homo sapiens OX=9606 GN=IMMT PE=1 SV=1
1436	3342	sp|O43353|RIPK2_HUMAN	72.3	6	0	0	6	0			1040000		3	3	0	0	3	0	Carbamidomethylation	61195	Receptor-interacting serine/threonine-protein kinase 2 OS=Homo sapiens OX=9606 GN=RIPK2 PE=1 SV=2
903	5062	tr|H3BMM9|H3BMM9_HUMAN	72.25	5	5	5	5	5	303000	462000	2800000	2320000	1	1	3	3	2	2		31701	RNA-binding protein with serine-rich domain 1 (Fragment) OS=Homo sapiens OX=9606 GN=RNPS1 PE=1 SV=1
903	5063	tr|H3BTC0|H3BTC0_HUMAN	72.25	5	5	5	5	5	303000	462000	2800000	2320000	1	1	3	3	2	2		33878	RNA-binding protein with serine-rich domain 1 (Fragment) OS=Homo sapiens OX=9606 GN=RNPS1 PE=1 SV=1
903	5064	sp|Q15287|RNPS1_HUMAN	72.25	5	5	5	5	5	303000	462000	2800000	2320000	1	1	3	3	2	2		34208	RNA-binding protein with serine-rich domain 1 OS=Homo sapiens OX=9606 GN=RNPS1 PE=1 SV=1
903	5327	tr|H3BV80|H3BV80_HUMAN	72.25	7	7	7	7	7	303000	462000	2800000	2320000	1	1	3	3	2	2		24561	RNA-binding protein with serine-rich domain 1 OS=Homo sapiens OX=9606 GN=RNPS1 PE=1 SV=2
903	5707	tr|H3BMS0|H3BMS0_HUMAN	72.25	6	6	6	6	6	303000	462000	2800000	2320000	1	1	3	3	2	2		27431	RNA-binding protein with serine-rich domain 1 OS=Homo sapiens OX=9606 GN=RNPS1 PE=1 SV=1
903	6159	tr|H3BPG5|H3BPG5_HUMAN	72.25	12	12	12	12	12	303000	462000	2800000	2320000	1	1	3	3	2	2		15108	RNA binding protein S1 serine-rich domain isoform CRA_c OS=Homo sapiens OX=9606 GN=RNPS1 PE=1 SV=1
1098	3638	sp|P62750|RL23A_HUMAN	72.14	21	16	8	0	13	780000	370000		426000	3	3	3	2	0	2		17695	60S ribosomal protein L23a OS=Homo sapiens OX=9606 GN=RPL23A PE=1 SV=1
1098	3639	tr|K7EJV9|K7EJV9_HUMAN	72.14	19	15	8	0	12	780000	370000		426000	3	3	3	2	0	2		19374	60S ribosomal protein L23a (Fragment) OS=Homo sapiens OX=9606 GN=RPL23A PE=1 SV=1
1098	3640	tr|K7ERT8|K7ERT8_HUMAN	72.14	19	14	7	0	12	780000	370000		426000	3	3	3	2	0	2		19640	60S ribosomal protein L23a (Fragment) OS=Homo sapiens OX=9606 GN=RPL23A PE=1 SV=1
1098	3641	tr|A8MUS3|A8MUS3_HUMAN	72.14	17	13	7	0	11	780000	370000		426000	3	3	3	2	0	2		21916	60S ribosomal protein L23a OS=Homo sapiens OX=9606 GN=RPL23A PE=1 SV=1
1098	3644	tr|H7BY10|H7BY10_HUMAN	72.14	21	16	8	0	13	780000	370000		426000	3	3	3	2	0	2		17811	60S ribosomal protein L23a (Fragment) OS=Homo sapiens OX=9606 GN=RPL23A PE=1 SV=1
1098	3653	tr|K7EMA7|K7EMA7_HUMAN	72.14	47	36	19	0	30	780000	370000		426000	3	3	3	2	0	2		7923	60S ribosomal protein L23a OS=Homo sapiens OX=9606 GN=RPL23A PE=1 SV=1
1202	3194	sp|Q14554|PDIA5_HUMAN	72.01	8	0	0	6	6			864000	425000	4	4	0	0	3	3	Carbamidomethylation	59594	Protein disulfide-isomerase A5 OS=Homo sapiens OX=9606 GN=PDIA5 PE=1 SV=1
1398	3685	sp|Q9ULX6|AKP8L_HUMAN	71.83	3	0	0	3	2			294000	60900	2	2	0	0	2	1	Carbamidomethylation	71640	A-kinase anchor protein 8-like OS=Homo sapiens OX=9606 GN=AKAP8L PE=1 SV=4
1307	3673	tr|J3KPG5|J3KPG5_HUMAN	71.77	2	0	0	2	1			395000	98900	3	3	0	0	3	1	Oxidation (M)	208074	Bromodomain adjacent to zinc finger domain protein 2A OS=Homo sapiens OX=9606 GN=BAZ2A PE=1 SV=1
1307	3674	tr|F8VU39|F8VU39_HUMAN	71.77	2	0	0	2	1			395000	98900	3	3	0	0	3	1	Oxidation (M)	210935	Bromodomain adjacent to zinc finger domain protein 2A OS=Homo sapiens OX=9606 GN=BAZ2A PE=1 SV=1
1307	3675	sp|Q9UIF9|BAZ2A_HUMAN	71.77	2	0	0	2	1			395000	98900	3	3	0	0	3	1	Oxidation (M)	211196	Bromodomain adjacent to zinc finger domain protein 2A OS=Homo sapiens OX=9606 GN=BAZ2A PE=1 SV=4
1307	3683	tr|A0A0C4DGI9|A0A0C4DGI9_HUMAN	71.77	5	0	0	5	2			395000	98900	3	3	0	0	3	1	Oxidation (M)	94570	Bromodomain adjacent to zinc finger domain protein 2A (Fragment) OS=Homo sapiens OX=9606 GN=BAZ2A PE=1 SV=1
1234	2902	sp|Q9NSE4|SYIM_HUMAN	71.73	4	0	0	3	2			852000	512000	4	4	0	0	3	2	Oxidation (M)	113791	Isoleucine--tRNA ligase mitochondrial OS=Homo sapiens OX=9606 GN=IARS2 PE=1 SV=2
1190	2949	sp|P02675|FIBB_HUMAN	71.56	8	0	0	6	5			4110000	6570000	4	4	0	0	3	4	Carbamidomethylation; Deamidation (NQ)	55928	Fibrinogen beta chain OS=Homo sapiens OX=9606 GN=FGB PE=1 SV=2
1190	3172	tr|D6REL8|D6REL8_HUMAN	71.56	12	0	0	8	6			2700000	4200000	3	3	0	0	2	3	Carbamidomethylation	31180	Fibrinogen beta chain OS=Homo sapiens OX=9606 GN=FGB PE=1 SV=1
1245	3284	tr|E9PPN3|E9PPN3_HUMAN	71.53	6	0	0	6	2			176000	61600	4	4	0	0	4	1	Carbamidomethylation	73685	N-terminal kinase-like protein OS=Homo sapiens OX=9606 GN=SCYL1 PE=1 SV=1
1245	3285	sp|Q96KG9|SCYL1_HUMAN	71.53	5	0	0	5	2			176000	61600	4	4	0	0	4	1	Carbamidomethylation	89631	N-terminal kinase-like protein OS=Homo sapiens OX=9606 GN=SCYL1 PE=1 SV=1
1245	3286	tr|E9PK59|E9PK59_HUMAN	71.53	5	0	0	5	2			176000	61600	4	4	0	0	4	1	Carbamidomethylation	86183	N-terminal kinase-like protein OS=Homo sapiens OX=9606 GN=SCYL1 PE=1 SV=1
1245	3287	tr|E9PS17|E9PS17_HUMAN	71.53	5	0	0	5	2			176000	61600	4	4	0	0	4	1	Carbamidomethylation	85719	N-terminal kinase-like protein OS=Homo sapiens OX=9606 GN=SCYL1 PE=1 SV=1
1253	2918	sp|Q13472|TOP3A_HUMAN	71.48	4	0	0	3	3			486000	215000	4	4	0	0	3	3	Deamidation (NQ)	112372	DNA topoisomerase 3-alpha OS=Homo sapiens OX=9606 GN=TOP3A PE=1 SV=1
1029	3809	tr|A0A087X2D0|A0A087X2D0_HUMAN	71.41	33	8	9	9	24	55300	30500	893000	801000	3	2	2	2	3	3	Carbamidomethylation	10321	Serine/arginine-rich-splicing factor 3 OS=Homo sapiens OX=9606 GN=SRSF3 PE=1 SV=1
1029	3831	sp|P84103|SRSF3_HUMAN	71.41	19	5	5	5	14	55300	30500	893000	801000	3	2	2	2	3	3	Carbamidomethylation	19330	Serine/arginine-rich splicing factor 3 OS=Homo sapiens OX=9606 GN=SRSF3 PE=1 SV=1
965	2782	sp|A2RRD8|ZN320_HUMAN	71.37	7	0	0	7	4			366000	37500	4	2	0	0	6	4	Acetylation (Protein N-term)	59326	Zinc finger protein 320 OS=Homo sapiens OX=9606 GN=ZNF320 PE=1 SV=1
965	2786	tr|A0A0U1RQK1|A0A0U1RQK1_HUMAN	71.37	8	0	0	8	4			366000	37500	4	2	0	0	6	4	Acetylation (Protein N-term)	56825	Uncharacterized protein (Fragment) OS=Homo sapiens OX=9606 PE=4 SV=1
965	2838	sp|Q96IR2|ZN845_HUMAN	71.37	3	0	0	3	2			366000	37500	3	2	0	0	5	4	Acetylation (Protein N-term)	113133	Zinc finger protein 845 OS=Homo sapiens OX=9606 GN=ZNF845 PE=1 SV=3
1012	2564	tr|F8VPD4|F8VPD4_HUMAN	71.22	4	1	0	3	1	10700		1100000	222000	7	7	1	0	6	2	Acetylation (Protein N-term)	236020	CAD protein OS=Homo sapiens OX=9606 GN=CAD PE=1 SV=1
1012	2565	sp|P27708|PYR1_HUMAN	71.22	4	0	0	3	1	10700		1100000	222000	7	7	1	0	6	2	Acetylation (Protein N-term)	242981	CAD protein OS=Homo sapiens OX=9606 GN=CAD PE=1 SV=3
1235	3063	sp|Q96CW5|GCP3_HUMAN	71.02	6	0	0	5	2			448000	180000	5	5	0	0	5	2	Deamidation (NQ)	103571	Gamma-tubulin complex component 3 OS=Homo sapiens OX=9606 GN=TUBGCP3 PE=1 SV=2
1229	2878	sp|P04053|TDT_HUMAN	70.93	6	0	0	6	2			563000	76200	3	3	0	0	3	1		58536	DNA nucleotidylexotransferase OS=Homo sapiens OX=9606 GN=DNTT PE=1 SV=3
1823	4818	tr|J3KSZ8|J3KSZ8_HUMAN	70.92	3	0	0	3	0			362000		1	1	0	0	1	0		65540	Male-specific lethal 1 homolog OS=Homo sapiens OX=9606 GN=MSL1 PE=1 SV=1
1823	4819	sp|Q68DK7|MSL1_HUMAN	70.92	3	0	0	3	0			362000		1	1	0	0	1	0		67129	Male-specific lethal 1 homolog OS=Homo sapiens OX=9606 GN=MSL1 PE=1 SV=3
1823	4837	tr|J3QQY0|J3QQY0_HUMAN	70.92	4	0	0	4	0			362000		1	1	0	0	1	0		48977	Male-specific lethal 1 homolog OS=Homo sapiens OX=9606 GN=MSL1 PE=1 SV=1
1230	2977	sp|Q96T58|MINT_HUMAN	70.87	2	0	0	2	0			444000	189000	5	5	0	0	8	1		402251	Msx2-interacting protein OS=Homo sapiens OX=9606 GN=SPEN PE=1 SV=1
1337	3696	sp|Q8NI60|COQ8A_HUMAN	70.69	4	0	0	4	2			1800000	382000	2	2	0	0	2	1		71950	Atypical kinase COQ8A mitochondrial OS=Homo sapiens OX=9606 GN=COQ8A PE=1 SV=1
1003	2314	sp|Q9NW08|RPC2_HUMAN	70.66	7	0	0	7	2			1790000	560000	9	9	0	0	9	2	Carbamidomethylation	127785	DNA-directed RNA polymerase III subunit RPC2 OS=Homo sapiens OX=9606 GN=POLR3B PE=1 SV=2
1249	3827	sp|P07199|CENPB_HUMAN	70.52	4	0	0	4	4			908000	1080000	2	2	0	0	2	2		65171	Major centromere autoantigen B OS=Homo sapiens OX=9606 GN=CENPB PE=1 SV=2
960	3255	sp|Q13247|SRSF6_HUMAN	70.51	7	0	3	7	7		16700	1170000	769000	3	1	0	1	5	8		39587	Serine/arginine-rich splicing factor 6 OS=Homo sapiens OX=9606 GN=SRSF6 PE=1 SV=2
1312	3622	sp|Q32MZ4|LRRF1_HUMAN	70.44	3	0	0	1	2				196000	2	1	0	0	2	1	Oxidation (M)	89253	Leucine-rich repeat flightless-interacting protein 1 OS=Homo sapiens OX=9606 GN=LRRFIP1 PE=1 SV=2
1262	3186	sp|P21281|VATB2_HUMAN	70.31	8	0	0	8	3			902000	97400	3	3	0	0	6	1		56501	V-type proton ATPase subunit B brain isoform OS=Homo sapiens OX=9606 GN=ATP6V1B2 PE=1 SV=3
1103	3275	sp|P23526|SAHH_HUMAN	70.15	12	12	8	0	0	812000	224000			5	5	5	3	0	0		47716	Adenosylhomocysteinase OS=Homo sapiens OX=9606 GN=AHCY PE=1 SV=4
1196	2644	sp|Q6P1M0|S27A4_HUMAN	70.14	8	0	0	1	8			203000	1180000	5	3	0	0	1	6		72064	Long-chain fatty acid transport protein 4 OS=Homo sapiens OX=9606 GN=SLC27A4 PE=1 SV=1
1042	2980	tr|F8VVM2|F8VVM2_HUMAN	69.99	11	6	0	8	6	734000		5080000	2510000	4	4	4	0	4	2		36161	Phosphate carrier protein mitochondrial OS=Homo sapiens OX=9606 GN=SLC25A3 PE=1 SV=1
1042	2987	sp|Q00325|MPCP_HUMAN	69.99	10	6	0	7	5	734000		5080000	2510000	4	4	4	0	4	2		40095	Phosphate carrier protein mitochondrial OS=Homo sapiens OX=9606 GN=SLC25A3 PE=1 SV=2
679	6206	sp|A0A0A0MS14|HV145_HUMAN	69.76	11	11	11	0	0	35100000	49200000			2	2	9	10	0	0	Carbamidomethylation; Oxidation (M)	13508	Immunoglobulin heavy variable 1-45 OS=Homo sapiens OX=9606 GN=IGHV1-45 PE=3 SV=1
1076	3064	sp|P14868|SYDC_HUMAN	68.82	11	7	0	3	4	450000		637000	423000	5	5	3	0	3	2		57136	Aspartate--tRNA ligase cytoplasmic OS=Homo sapiens OX=9606 GN=DARS PE=1 SV=2
1378	2969	tr|A0A087WU65|A0A087WU65_HUMAN	68.8	6	0	0	0	6				1290000	3	3	0	0	0	3		50736	Vacuolar protein sorting-associated protein 45 OS=Homo sapiens OX=9606 GN=VPS45 PE=1 SV=1
1378	2991	tr|A0A2R8YE10|A0A2R8YE10_HUMAN	68.8	5	0	0	0	5				1290000	3	3	0	0	0	3		61134	Vacuolar protein sorting-associated protein 45 OS=Homo sapiens OX=9606 GN=VPS45 PE=1 SV=1
1378	2992	sp|Q9NRW7|VPS45_HUMAN	68.8	5	0	0	0	5				1290000	3	3	0	0	0	3		65077	Vacuolar protein sorting-associated protein 45 OS=Homo sapiens OX=9606 GN=VPS45 PE=1 SV=1
1378	3007	tr|A0A2R8YF01|A0A2R8YF01_HUMAN	68.8	6	0	0	0	6				1290000	3	3	0	0	0	3		50051	Vacuolar protein sorting-associated protein 45 OS=Homo sapiens OX=9606 GN=VPS45 PE=1 SV=1
1378	3008	tr|A0A1B0GXI6|A0A1B0GXI6_HUMAN	68.8	6	0	0	0	6				1290000	3	3	0	0	0	3		53843	Vacuolar protein sorting-associated protein 45 (Fragment) OS=Homo sapiens OX=9606 GN=VPS45 PE=1 SV=2
1378	3011	tr|A0A2R8YD95|A0A2R8YD95_HUMAN	68.8	4	0	0	0	4				1290000	3	3	0	0	0	3		73654	Vacuolar protein sorting-associated protein 45 OS=Homo sapiens OX=9606 GN=VPS45 PE=1 SV=1
1151	3317	sp|Q8N766|EMC1_HUMAN	68.79	4	0	0	4	4			619000	388000	3	3	0	0	3	4		111759	ER membrane protein complex subunit 1 OS=Homo sapiens OX=9606 GN=EMC1 PE=1 SV=1
1157	3044	sp|P49116|NR2C2_HUMAN	68.4	14	0	3	6	8		155000	781000	931000	5	5	0	1	2	3	Carbamidomethylation; Deamidation (NQ)	65415	Nuclear receptor subfamily 2 group C member 2 OS=Homo sapiens OX=9606 GN=NR2C2 PE=1 SV=1
1422	4562	tr|M0R205|M0R205_HUMAN	68.38	11	0	0	11	8			690000	197000	2	2	0	0	3	1	Deamidation (NQ)	31804	Interferon regulatory factor 3 (Fragment) OS=Homo sapiens OX=9606 GN=IRF3 PE=1 SV=1
1422	4563	tr|M0QZB8|M0QZB8_HUMAN	68.38	9	0	0	9	7			690000	197000	2	2	0	0	3	1	Deamidation (NQ)	36307	Interferon regulatory factor 3 OS=Homo sapiens OX=9606 GN=IRF3 PE=1 SV=1
1422	4565	tr|M0QZB7|M0QZB7_HUMAN	68.38	8	0	0	8	5			690000	197000	2	2	0	0	3	1	Deamidation (NQ)	44471	Interferon regulatory factor 3 OS=Homo sapiens OX=9606 GN=IRF3 PE=1 SV=1
1422	4566	sp|Q14653|IRF3_HUMAN	68.38	7	0	0	7	5			690000	197000	2	2	0	0	3	1	Deamidation (NQ)	47219	Interferon regulatory factor 3 OS=Homo sapiens OX=9606 GN=IRF3 PE=1 SV=1
1422	4693	tr|M0R0X9|M0R0X9_HUMAN	68.38	30	0	0	30	21			690000	197000	2	2	0	0	3	1	Deamidation (NQ)	11354	Interferon regulatory factor 3 (Fragment) OS=Homo sapiens OX=9606 GN=IRF3 PE=1 SV=8
1422	4694	tr|M0QXC8|M0QXC8_HUMAN	68.38	26	0	0	26	18			690000	197000	2	2	0	0	3	1	Deamidation (NQ)	12982	Interferon regulatory factor 3 (Fragment) OS=Homo sapiens OX=9606 GN=IRF3 PE=1 SV=1
1422	4695	tr|M0QYT9|M0QYT9_HUMAN	68.38	11	0	0	11	8			690000	197000	2	2	0	0	3	1	Deamidation (NQ)	30779	Interferon regulatory factor 3 OS=Homo sapiens OX=9606 GN=IRF3 PE=1 SV=1
1422	5391	tr|M0R3C2|M0R3C2_HUMAN	68.38	8	0	0	8	8			690000	197000	1	1	0	0	2	1	Deamidation (NQ)	29195	Interferon regulatory factor 3 (Fragment) OS=Homo sapiens OX=9606 GN=IRF3 PE=1 SV=1
1422	5792	tr|M0R0R8|M0R0R8_HUMAN	68.38	26	0	0	26	26			690000	197000	1	1	0	0	2	1	Deamidation (NQ)	9161	Interferon regulatory factor 3 (Fragment) OS=Homo sapiens OX=9606 GN=IRF3 PE=1 SV=1
1422	6161	tr|M0QX56|M0QX56_HUMAN	68.38	16	0	0	16	16			690000	197000	1	1	0	0	2	1	Deamidation (NQ)	13982	Interferon regulatory factor 3 OS=Homo sapiens OX=9606 GN=IRF3 PE=1 SV=1
1299	5908	sp|P55854|SUMO3_HUMAN	68.3	12	0	0	12	12			1700000	2520000	1	1	0	0	1	3		11637	Small ubiquitin-related modifier 3 OS=Homo sapiens OX=9606 GN=SUMO3 PE=1 SV=2
1299	5909	tr|A8MUA9|A8MUA9_HUMAN	68.3	9	0	0	9	9			1700000	2520000	1	1	0	0	1	3		15318	SMT3 suppressor of mif two 3 homolog 3 (Yeast) isoform CRA_d OS=Homo sapiens OX=9606 GN=SUMO3 PE=1 SV=1
1299	5910	tr|A8MU27|A8MU27_HUMAN	68.3	8	0	0	8	8			1700000	2520000	1	1	0	0	1	3		16956	Small ubiquitin-related modifier 3 OS=Homo sapiens OX=9606 GN=SUMO3 PE=1 SV=1
1299	6167	sp|Q6EEV6|SUMO4_HUMAN	68.3	13	0	0	13	13			1700000	2520000	1	1	0	0	1	3		10685	Small ubiquitin-related modifier 4 OS=Homo sapiens OX=9606 GN=SUMO4 PE=1 SV=2
1299	6168	sp|P61956|SUMO2_HUMAN	68.3	13	0	0	13	13			1700000	2520000	1	1	0	0	1	3		10871	Small ubiquitin-related modifier 2 OS=Homo sapiens OX=9606 GN=SUMO2 PE=1 SV=3
1164	2897	sp|Q3KQV9|UAP1L_HUMAN	68.25	6	0	0	6	3			1480000	801000	3	3	0	0	3	2		57030	UDP-N-acetylhexosamine pyrophosphorylase-like protein 1 OS=Homo sapiens OX=9606 GN=UAP1L1 PE=1 SV=2
1513	3482	sp|Q66K14|TBC9B_HUMAN	68.16	2	0	0	2	1			333000	31200	3	3	0	0	3	1		140525	TBC1 domain family member 9B OS=Homo sapiens OX=9606 GN=TBC1D9B PE=1 SV=3
986	3956	sp|P31025|LCN1_HUMAN	68.08	12	6	12	12	12	378000	413000	470000	266000	2	2	2	3	2	2		19250	Lipocalin-1 OS=Homo sapiens OX=9606 GN=LCN1 PE=1 SV=1
986	4469	sp|Q5VSP4|LC1L1_HUMAN	68.08	14	7	14	14	14	378000	413000	470000	266000	2	2	2	3	2	2		17918	Putative lipocalin 1-like protein 1 OS=Homo sapiens OX=9606 GN=LCN1P1 PE=5 SV=1
1122	3343	sp|P04004|VTNC_HUMAN	68.03	8	6	0	4	5	0		186000		5	2	4	0	2	2		54306	Vitronectin OS=Homo sapiens OX=9606 GN=VTN PE=1 SV=1
1288	3320	tr|M0R2P6|M0R2P6_HUMAN	67.94	8	0	0	3	7			1500000	1990000	4	4	0	0	2	3	Acetylation (Protein N-term)	73708	SH3KBP1 binding protein 1 isoform CRA_c OS=Homo sapiens OX=9606 GN=SHKBP1 PE=1 SV=1
1288	3321	sp|Q8TBC3|SHKB1_HUMAN	67.94	8	0	0	3	7			1500000	1990000	4	4	0	0	2	3	Acetylation (Protein N-term)	76344	SH3KBP1-binding protein 1 OS=Homo sapiens OX=9606 GN=SHKBP1 PE=1 SV=2
1383	3334	tr|E7ENQ1|E7ENQ1_HUMAN	67.84	3	0	0	3	1			794000	282000	3	3	0	0	3	2		132166	Mitogen-activated protein kinase kinase kinase kinase 4 OS=Homo sapiens OX=9606 GN=MAP4K4 PE=1 SV=1
1383	3335	tr|G3XAA2|G3XAA2_HUMAN	67.84	3	0	0	3	1			794000	282000	3	3	0	0	3	2		133484	Mitogen-activated protein kinase kinase kinase kinase 4 OS=Homo sapiens OX=9606 GN=MAP4K4 PE=1 SV=2
1383	3336	tr|H7C360|H7C360_HUMAN	67.84	3	0	0	3	1			794000	282000	3	3	0	0	3	2		134171	Mitogen-activated protein kinase kinase kinase kinase 4 (Fragment) OS=Homo sapiens OX=9606 GN=MAP4K4 PE=1 SV=1
1383	3338	tr|G5E948|G5E948_HUMAN	67.84	3	0	0	3	1			794000	282000	3	3	0	0	3	2		141148	Mitogen-activated protein kinase kinase kinase kinase 4 OS=Homo sapiens OX=9606 GN=MAP4K4 PE=1 SV=2
1383	3339	sp|O95819|M4K4_HUMAN	67.84	3	0	0	3	1			794000	282000	3	3	0	0	3	2		142101	Mitogen-activated protein kinase kinase kinase kinase 4 OS=Homo sapiens OX=9606 GN=MAP4K4 PE=1 SV=2
1383	3340	tr|E7EN19|E7EN19_HUMAN	67.84	3	0	0	3	1			794000	282000	3	3	0	0	3	2		144917	Mitogen-activated protein kinase kinase kinase kinase 4 OS=Homo sapiens OX=9606 GN=MAP4K4 PE=1 SV=1
1383	3341	tr|A0A0D9SEY1|A0A0D9SEY1_HUMAN	67.84	3	0	0	3	1			794000	282000	3	3	0	0	3	2		151083	Mitogen-activated protein kinase kinase kinase kinase 4 isoform CRA_a OS=Homo sapiens OX=9606 GN=MAP4K4 PE=1 SV=1
1402	3938	sp|Q9H0W8|SMG9_HUMAN	67.76	6	0	0	6	3			953000	0	2	2	0	0	2	1		57651	Protein SMG9 OS=Homo sapiens OX=9606 GN=SMG9 PE=1 SV=1
1397	3665	sp|O00178|GTPB1_HUMAN	67.7	7	0	0	6	4			1380000	530000	4	4	0	0	3	2		72454	GTP-binding protein 1 OS=Homo sapiens OX=9606 GN=GTPBP1 PE=1 SV=3
1160	3288	sp|Q9UBS0|KS6B2_HUMAN	67.45	7	0	0	7	2			966000		3	2	0	0	7	1	Carbamidomethylation	53455	Ribosomal protein S6 kinase beta-2 OS=Homo sapiens OX=9606 GN=RPS6KB2 PE=1 SV=2
1325	3900	sp|P52209|6PGD_HUMAN	67.39	7	5	4	0	2	285000	110000		122000	3	3	2	1	0	1		53140	6-phosphogluconate dehydrogenase decarboxylating OS=Homo sapiens OX=9606 GN=PGD PE=1 SV=3
1325	3992	tr|K7EPF6|K7EPF6_HUMAN	67.39	11	7	7	0	4	285000	110000		122000	2	2	1	1	0	1		27884	6-phosphogluconate dehydrogenase decarboxylating (Fragment) OS=Homo sapiens OX=9606 GN=PGD PE=1 SV=1
1325	4337	tr|K7EM49|K7EM49_HUMAN	67.39	14	8	8	0	5	285000	110000		122000	2	2	1	1	0	1		22258	6-phosphogluconate dehydrogenase decarboxylating (Fragment) OS=Homo sapiens OX=9606 GN=PGD PE=1 SV=1
1325	4346	tr|K7EMN2|K7EMN2_HUMAN	67.39	18	11	11	0	7	285000	110000		122000	2	2	1	1	0	1		17293	6-phosphogluconate dehydrogenase decarboxylating (Fragment) OS=Homo sapiens OX=9606 GN=PGD PE=1 SV=1
1376	2887	sp|Q9Y2H1|ST38L_HUMAN	67.39	12	0	0	9	5			2270000	745000	5	5	0	0	5	2		54003	Serine/threonine-protein kinase 38-like OS=Homo sapiens OX=9606 GN=STK38L PE=1 SV=3
1038	3832	tr|H0Y8X0|H0Y8X0_HUMAN	67.37	11	0	11	4	4		389000	612000	743000	3	3	0	3	2	3		32709	Protein DEK OS=Homo sapiens OX=9606 GN=DEK PE=1 SV=2
1038	3846	tr|D6R9L5|D6R9L5_HUMAN	67.37	21	0	21	8	8		389000	612000	743000	3	3	0	3	2	3		17255	Protein DEK (Fragment) OS=Homo sapiens OX=9606 GN=DEK PE=1 SV=1
1038	3847	sp|P35659|DEK_HUMAN	67.37	8	0	8	3	3		389000	612000	743000	3	3	0	3	2	3		42674	Protein DEK OS=Homo sapiens OX=9606 GN=DEK PE=1 SV=1
1491	4200	sp|Q9H2D6|TARA_HUMAN	67.34	1	0	0	1	0			1290000		2	1	0	0	3	0		261373	TRIO and F-actin-binding protein OS=Homo sapiens OX=9606 GN=TRIOBP PE=1 SV=3
1096	3280	sp|P55084|ECHB_HUMAN	67.2	13	10	4	0	0	464000	268000			6	6	6	2	0	0		51294	Trifunctional enzyme subunit beta mitochondrial OS=Homo sapiens OX=9606 GN=HADHB PE=1 SV=3
841	2661	sp|P19367|HXK1_HUMAN	67.15	8	0	0	6	6			2410000	1210000	8	8	0	0	6	7		102486	Hexokinase-1 OS=Homo sapiens OX=9606 GN=HK1 PE=1 SV=3
1101	2593	sp|Q8IX12|CCAR1_HUMAN	67.14	3	0	0	2	2			2530000	932000	4	4	0	0	4	3		132821	Cell division cycle and apoptosis regulator protein 1 OS=Homo sapiens OX=9606 GN=CCAR1 PE=1 SV=2
1145	3531	sp|Q96BR1|SGK3_HUMAN	67.06	5	0	0	5	4			707000	247000	3	2	0	0	7	2	Carbamidomethylation	57108	Serine/threonine-protein kinase Sgk3 OS=Homo sapiens OX=9606 GN=SGK3 PE=1 SV=1
1416	3749	tr|J3QT87|J3QT87_HUMAN	66.73	7	0	0	7	3			1050000	379000	2	2	0	0	2	1	Carbamidomethylation	45461	Protein cereblon (Fragment) OS=Homo sapiens OX=9606 GN=CRBN PE=1 SV=1
1416	3750	sp|Q96SW2|CRBN_HUMAN	66.73	7	0	0	7	3			1050000	379000	2	2	0	0	2	1	Carbamidomethylation	50546	Protein cereblon OS=Homo sapiens OX=9606 GN=CRBN PE=1 SV=1
1416	3751	tr|A0A1W2PPJ5|A0A1W2PPJ5_HUMAN	66.73	6	0	0	6	2			1050000	379000	2	2	0	0	2	1	Carbamidomethylation	55782	Protein cereblon OS=Homo sapiens OX=9606 GN=CRBN PE=1 SV=1
1286	3071	sp|Q9UJX3|APC7_HUMAN	66.41	6	0	0	6	2			752000	590000	3	3	0	0	3	1		66856	Anaphase-promoting complex subunit 7 OS=Homo sapiens OX=9606 GN=ANAPC7 PE=1 SV=4
1250	4190	sp|P23443|KS6B1_HUMAN	66.41	5	0	0	2	5				730000	2	1	0	0	5	2	Carbamidomethylation	59140	Ribosomal protein S6 kinase beta-1 OS=Homo sapiens OX=9606 GN=RPS6KB1 PE=1 SV=2
1480	3358	tr|E9PD53|E9PD53_HUMAN	66.02	3	0	0	3	0			657000		4	4	0	0	4	0		144455	Structural maintenance of chromosomes protein OS=Homo sapiens OX=9606 GN=SMC4 PE=1 SV=1
1480	3359	sp|Q9NTJ3|SMC4_HUMAN	66.02	3	0	0	3	0			657000		4	4	0	0	4	0		147182	Structural maintenance of chromosomes protein 4 OS=Homo sapiens OX=9606 GN=SMC4 PE=1 SV=2
717	4500	sp|P32119|PRDX2_HUMAN	65.68	10	10	10	10	10	165000	203000	171000	123000	2	1	3	4	5	4		21892	Peroxiredoxin-2 OS=Homo sapiens OX=9606 GN=PRDX2 PE=1 SV=5
1165	3013	sp|O94874|UFL1_HUMAN	65.63	5	0	0	3	4			583000	1250000	4	4	0	0	3	4		89595	E3 UFM1-protein ligase 1 OS=Homo sapiens OX=9606 GN=UFL1 PE=1 SV=2
1370	3884	tr|H0YAM7|H0YAM7_HUMAN	65.31	11	11	0	0	5	485000			84900	2	2	2	0	0	1		27424	Receptor of-activated protein C kinase 1 (Fragment) OS=Homo sapiens OX=9606 GN=RACK1 PE=1 SV=1
1370	3978	sp|P63244|RACK1_HUMAN	65.31	15	15	0	0	4	890000			84900	4	4	4	0	0	1		35077	Receptor of activated protein C kinase 1 OS=Homo sapiens OX=9606 GN=RACK1 PE=1 SV=3
1370	3991	tr|J3KPE3|J3KPE3_HUMAN	65.31	13	13	0	0	4	613000			84900	3	3	3	0	0	1		30104	Receptor of-activated protein C kinase 1 OS=Homo sapiens OX=9606 GN=RACK1 PE=1 SV=1
1370	4002	tr|H0Y8W2|H0Y8W2_HUMAN	65.31	13	13	0	0	4	613000			84900	3	3	3	0	0	1		30271	Receptor of-activated protein C kinase 1 (Fragment) OS=Homo sapiens OX=9606 GN=RACK1 PE=1 SV=1
1370	4067	tr|H0YAF8|H0YAF8_HUMAN	65.31	14	14	0	0	6	485000			84900	2	2	2	0	0	1		22053	Receptor of-activated protein C kinase 1 (Fragment) OS=Homo sapiens OX=9606 GN=RACK1 PE=1 SV=1
1301	3262	tr|B1AH77|B1AH77_HUMAN	65.19	23	23	5	0	0	1110000	90500			3	3	3	1	0	0		16775	Ras-related C3 botulinum toxin substrate 2 OS=Homo sapiens OX=9606 GN=RAC2 PE=1 SV=1
1301	3263	tr|B1AH80|B1AH80_HUMAN	65.19	18	18	4	0	0	1110000	90500			3	3	3	1	0	0		20799	Ras-related C3 botulinum toxin substrate 2 (Rho family small GTP binding protein Rac2) isoform CRA_c OS=Homo sapiens OX=9606 GN=RAC2 PE=1 SV=1
1301	3264	sp|P15153|RAC2_HUMAN	65.19	18	18	4	0	0	1110000	90500			3	3	3	1	0	0		21429	Ras-related C3 botulinum toxin substrate 2 OS=Homo sapiens OX=9606 GN=RAC2 PE=1 SV=1
1143	3791	sp|Q9H6W3|RIOX1_HUMAN	65.15	4	0	0	4	4			508000	588000	2	2	0	0	2	3		71086	Ribosomal oxygenase 1 OS=Homo sapiens OX=9606 GN=RIOX1 PE=1 SV=2
1175	3357	sp|P32456|GBP2_HUMAN	65.12	6	0	0	6	6			1340000	3240000	3	3	0	0	4	3		67209	Guanylate-binding protein 2 OS=Homo sapiens OX=9606 GN=GBP2 PE=1 SV=3
1174	3259	tr|J3KPX7|J3KPX7_HUMAN	64.96	14	14	0	3	0	247000		50000		4	4	4	0	1	0		33239	Prohibitin-2 OS=Homo sapiens OX=9606 GN=PHB2 PE=1 SV=2
1174	3260	sp|Q99623|PHB2_HUMAN	64.96	14	14	0	3	0	247000		50000		4	4	4	0	1	0		33296	Prohibitin-2 OS=Homo sapiens OX=9606 GN=PHB2 PE=1 SV=2
1174	3261	tr|F5GY37|F5GY37_HUMAN	64.96	16	16	0	4	0	247000		50000		4	4	4	0	1	0		29723	Prohibitin-2 OS=Homo sapiens OX=9606 GN=PHB2 PE=1 SV=1
1381	3315	sp|P49761|CLK3_HUMAN	64.96	8	0	0	6	4			2030000	180000	4	4	0	0	3	2		73515	Dual specificity protein kinase CLK3 OS=Homo sapiens OX=9606 GN=CLK3 PE=1 SV=3
1011	2413	sp|Q5JTH9|RRP12_HUMAN	64.77	6	0	0	4	4			2740000	1250000	9	8	0	0	7	5	Carbamidomethylation	143702	RRP12-like protein OS=Homo sapiens OX=9606 GN=RRP12 PE=1 SV=2
1167	3054	sp|P78362|SRPK2_HUMAN	64.48	6	0	0	6	3			493000	215000	4	2	0	0	4	2		77527	SRSF protein kinase 2 OS=Homo sapiens OX=9606 GN=SRPK2 PE=1 SV=3
1393	3300	sp|Q99615|DNJC7_HUMAN	64.38	6	0	0	4	3			390000	370000	3	3	0	0	2	1		56441	DnaJ homolog subfamily C member 7 OS=Homo sapiens OX=9606 GN=DNAJC7 PE=1 SV=2
1483	3267	sp|Q96JM3|CHAP1_HUMAN	64.37	6	0	0	6	2			851000	206000	5	5	0	0	7	2		89099	Chromosome alignment-maintaining phosphoprotein 1 OS=Homo sapiens OX=9606 GN=CHAMP1 PE=1 SV=2
1113	3094	sp|Q13356|PPIL2_HUMAN	64.34	8	0	0	5	8			1810000	2680000	4	4	0	0	3	4		58824	RING-type E3 ubiquitin-protein ligase PPIL2 OS=Homo sapiens OX=9606 GN=PPIL2 PE=1 SV=1
1094	3157	sp|P31947|1433S_HUMAN	64.28	16	6	0	10	7	87800				4	1	1	0	4	2	Oxidation (M)	27774	14-3-3 protein sigma OS=Homo sapiens OX=9606 GN=SFN PE=1 SV=1
1216	4040	sp|Q15797|SMAD1_HUMAN	64.24	5	0	0	5	5			271000	137000	2	1	0	0	3	2	Carbamidomethylation	52260	Mothers against decapentaplegic homolog 1 OS=Homo sapiens OX=9606 GN=SMAD1 PE=1 SV=1
1216	4064	sp|Q99717|SMAD5_HUMAN	64.24	5	0	0	5	5			271000	137000	2	1	0	0	3	2	Carbamidomethylation	52258	Mothers against decapentaplegic homolog 5 OS=Homo sapiens OX=9606 GN=SMAD5 PE=1 SV=1
1115	3987	tr|E9PP50|E9PP50_HUMAN	64.17	14	14	8	8	7	303000	73800	360000	105000	2	2	2	1	2	2	Acetylation (Protein N-term)	17778	Cofilin-1 (Fragment) OS=Homo sapiens OX=9606 GN=CFL1 PE=1 SV=8
1115	3988	sp|P23528|COF1_HUMAN	64.17	14	14	7	7	7	303000	73800	360000	105000	2	2	2	1	2	2	Acetylation (Protein N-term)	18502	Cofilin-1 OS=Homo sapiens OX=9606 GN=CFL1 PE=1 SV=3
1441	4012	tr|E5RFQ1|E5RFQ1_HUMAN	64.16	4	0	0	2	4			562000	400000	2	2	0	0	1	2		57491	Transcription factor COE1 OS=Homo sapiens OX=9606 GN=EBF1 PE=1 SV=1
1441	4013	sp|Q9UH73|COE1_HUMAN	64.16	4	0	0	2	4			562000	400000	2	2	0	0	1	2		64464	Transcription factor COE1 OS=Homo sapiens OX=9606 GN=EBF1 PE=1 SV=2
968	2695	sp|Q8N3U4|STAG2_HUMAN	64.12	4	0	0	4	2			670000	0	6	4	0	0	6	3	Carbamidomethylation	141326	Cohesin subunit SA-2 OS=Homo sapiens OX=9606 GN=STAG2 PE=1 SV=3
1274	3108	tr|F8VRS4|F8VRS4_HUMAN	64.07	9	0	0	7	6			633000	586000	3	3	0	0	2	2		42264	RNA binding protein fox-1 homolog OS=Homo sapiens OX=9606 GN=RBFOX1 PE=4 SV=1
1274	3109	tr|B7Z1U7|B7Z1U7_HUMAN	64.07	8	0	0	6	6			633000	586000	3	3	0	0	2	2		45950	RNA binding protein fox-1 homolog OS=Homo sapiens OX=9606 GN=RBFOX1 PE=1 SV=1
1274	3110	tr|F8VZG9|F8VZG9_HUMAN	64.07	8	0	0	6	5			633000	586000	3	3	0	0	2	2		50561	RNA-binding protein fox-1 homolog 1 OS=Homo sapiens OX=9606 GN=RBFOX1 PE=4 SV=1
1274	3111	tr|A0A286YEU2|A0A286YEU2_HUMAN	64.07	6	0	0	4	4			633000	586000	3	3	0	0	2	2		62713	RNA-binding protein fox-1 homolog 1 OS=Homo sapiens OX=9606 GN=RBFOX1 PE=1 SV=1
1274	3123	tr|A0A087X2B1|A0A087X2B1_HUMAN	64.07	10	0	0	7	7			633000	586000	3	3	0	0	2	2		40310	RNA binding protein fox-1 homolog OS=Homo sapiens OX=9606 GN=RBFOX1 PE=1 SV=1
1274	3124	sp|Q9NWB1|RFOX1_HUMAN	64.07	9	0	0	7	6			633000	586000	3	3	0	0	2	2		42784	RNA binding protein fox-1 homolog 1 OS=Homo sapiens OX=9606 GN=RBFOX1 PE=1 SV=2
1274	3125	tr|J3KNW3|J3KNW3_HUMAN	64.07	9	0	0	6	6			633000	586000	3	3	0	0	2	2		43089	RNA binding protein fox-1 homolog OS=Homo sapiens OX=9606 GN=RBFOX1 PE=1 SV=1
1274	3136	tr|B0QYV1|B0QYV1_HUMAN	64.07	10	0	0	7	7			633000	586000	3	3	0	0	2	2		37866	RNA binding protein fox-1 homolog OS=Homo sapiens OX=9606 GN=RBFOX2 PE=1 SV=1
1274	3137	tr|A0A0G2JRA5|A0A0G2JRA5_HUMAN	64.07	9	0	0	7	6			633000	586000	3	3	0	0	2	2		41243	RNA-binding protein fox-1 homolog 2 (Fragment) OS=Homo sapiens OX=9606 GN=RBFOX2 PE=1 SV=1
1274	3138	sp|O43251|RFOX2_HUMAN	64.07	9	0	0	7	6			633000	586000	3	3	0	0	2	2		41374	RNA binding protein fox-1 homolog 2 OS=Homo sapiens OX=9606 GN=RBFOX2 PE=1 SV=3
1274	3187	tr|I3L1D4|I3L1D4_HUMAN	64.07	19	0	0	14	13			633000	586000	3	3	0	0	2	2		20661	RNA-binding protein fox-1 homolog 1 (Fragment) OS=Homo sapiens OX=9606 GN=RBFOX1 PE=4 SV=1
1274	3188	tr|S4R469|S4R469_HUMAN	64.07	15	0	0	11	11			633000	586000	3	3	0	0	2	2		25265	RNA-binding protein fox-1 homolog 2 (Fragment) OS=Homo sapiens OX=9606 GN=RBFOX2 PE=1 SV=1
1274	3189	tr|F8VR27|F8VR27_HUMAN	64.07	14	0	0	10	10			633000	586000	3	3	0	0	2	2		28437	RNA-binding protein fox-1 homolog 1 (Fragment) OS=Homo sapiens OX=9606 GN=RBFOX1 PE=4 SV=1
1274	3190	tr|F8VZY7|F8VZY7_HUMAN	64.07	14	0	0	10	10			633000	586000	3	3	0	0	2	2		28566	RNA-binding protein fox-1 homolog 1 (Fragment) OS=Homo sapiens OX=9606 GN=RBFOX1 PE=4 SV=1
1274	3191	tr|B0QYY4|B0QYY4_HUMAN	64.07	10	0	0	7	7			633000	586000	3	3	0	0	2	2		39940	RNA binding protein fox-1 homolog OS=Homo sapiens OX=9606 GN=RBFOX2 PE=1 SV=1
1869	4897	sp|Q96JB5|CK5P3_HUMAN	64.05	3	0	0	0	3				217000	1	1	0	0	0	1		56921	CDK5 regulatory subunit-associated protein 3 OS=Homo sapiens OX=9606 GN=CDK5RAP3 PE=1 SV=2
1869	4998	tr|J3QRM1|J3QRM1_HUMAN	64.05	5	0	0	0	5				217000	1	1	0	0	0	1		30211	CDK5 regulatory subunit-associated protein 3 (Fragment) OS=Homo sapiens OX=9606 GN=CDK5RAP3 PE=1 SV=1
1663	6171	tr|G3V279|G3V279_HUMAN	63.87	15	0	0	15	15			365000	102000	1	1	0	0	1	1	Acetylation (Protein N-term)	8203	Enhancer of rudimentary homolog OS=Homo sapiens OX=9606 GN=ERH PE=1 SV=1
1663	6173	sp|P84090|ERH_HUMAN	63.87	11	0	0	11	11			365000	102000	1	1	0	0	1	1	Acetylation (Protein N-term)	12259	Enhancer of rudimentary homolog OS=Homo sapiens OX=9606 GN=ERH PE=1 SV=1
1358	3573	sp|Q32P44|EMAL3_HUMAN	63.65	4	0	0	4	2			101000	46300	3	3	0	0	3	1		95197	Echinoderm microtubule-associated protein-like 3 OS=Homo sapiens OX=9606 GN=EML3 PE=1 SV=1
1358	3574	tr|B7WPE2|B7WPE2_HUMAN	63.65	4	0	0	4	2			101000	46300	3	3	0	0	3	1		95284	Echinoderm microtubule associated protein like 3 isoform CRA_e OS=Homo sapiens OX=9606 GN=EML3 PE=1 SV=1
1358	3581	tr|H0Y3M3|H0Y3M3_HUMAN	63.65	4	0	0	4	2			101000	46300	3	3	0	0	3	1		97537	Echinoderm microtubule-associated protein-like 3 (Fragment) OS=Homo sapiens OX=9606 GN=EML3 PE=1 SV=2
1358	3590	tr|G3V1D0|G3V1D0_HUMAN	63.65	4	0	0	4	2			101000	46300	3	3	0	0	3	1		95025	Echinoderm microtubule associated protein like 3 isoform CRA_f OS=Homo sapiens OX=9606 GN=EML3 PE=1 SV=1
1358	4052	tr|G3V195|G3V195_HUMAN	63.65	4	0	0	4	2			68400	46300	2	2	0	0	2	1		73282	Echinoderm microtubule associated protein like 3 isoform CRA_c OS=Homo sapiens OX=9606 GN=EML3 PE=1 SV=1
951	3549	tr|A0A0C4DH36|A0A0C4DH36_HUMAN	63.57	21	21	21	0	0	5090000	3780000			3	2	4	6	0	0	Oxidation (M)	12759	Immunoglobulin heavy variable 3-38 (non-functional) (Fragment) OS=Homo sapiens OX=9606 GN=IGHV3-38 PE=1 SV=1
1152	2767	sp|P27824|CALX_HUMAN	63.43	7	0	0	7	3			1870000	459000	5	5	0	0	6	2		67568	Calnexin OS=Homo sapiens OX=9606 GN=CANX PE=1 SV=2
1382	3331	sp|Q9HD20|AT131_HUMAN	63.18	4	0	0	4	1			1300000	64900	4	4	0	0	4	1		132955	Manganese-transporting ATPase 13A1 OS=Homo sapiens OX=9606 GN=ATP13A1 PE=1 SV=2
1556	3459	tr|G5EA36|G5EA36_HUMAN	63.11	5	0	0	5	0			231000		3	3	0	0	3	0		91738	Cell division cycle 27 isoform CRA_c OS=Homo sapiens OX=9606 GN=CDC27 PE=1 SV=1
1556	3460	sp|P30260|CDC27_HUMAN	63.11	5	0	0	5	0			231000		3	3	0	0	3	0		91867	Cell division cycle protein 27 homolog OS=Homo sapiens OX=9606 GN=CDC27 PE=1 SV=2
1104	3296	tr|A0A0D9SEM4|A0A0D9SEM4_HUMAN	63.08	7	0	0	4	7				35000	3	1	0	0	3	7	Deamidation (NQ)	43647	Serine/arginine-rich-splicing factor 4 (Fragment) OS=Homo sapiens OX=9606 GN=SRSF4 PE=1 SV=1
1104	3301	sp|Q08170|SRSF4_HUMAN	63.08	6	0	0	3	6				35000	3	1	0	0	3	7	Deamidation (NQ)	56678	Serine/arginine-rich splicing factor 4 OS=Homo sapiens OX=9606 GN=SRSF4 PE=1 SV=2
1652	5753	sp|Q9Y5X2|SNX8_HUMAN	63.05	3	0	0	3	3			595000	365000	1	1	0	0	1	1		52569	Sorting nexin-8 OS=Homo sapiens OX=9606 GN=SNX8 PE=1 SV=1
1039	4684	sp|P62318|SMD3_HUMAN	63.02	15	15	7	15	8	30600	1510000	63600	509000	2	2	3	1	3	2	Oxidation (M)	13916	Small nuclear ribonucleoprotein Sm D3 OS=Homo sapiens OX=9606 GN=SNRPD3 PE=1 SV=1
1379	3091	sp|Q9Y6P5|SESN1_HUMAN	62.96	6	0	0	0	6				2190000	3	3	0	0	0	4	Oxidation (M)	56557	Sestrin-1 OS=Homo sapiens OX=9606 GN=SESN1 PE=1 SV=2
1505	3732	sp|P07332|FES_HUMAN	62.88	3	0	0	3	3			952000	462000	2	2	0	0	2	2		93497	Tyrosine-protein kinase Fes/Fps OS=Homo sapiens OX=9606 GN=FES PE=1 SV=3
1505	3743	tr|E7ENM8|E7ENM8_HUMAN	62.88	3	0	0	3	3			952000	462000	2	2	0	0	2	2		76801	Tyrosine-protein kinase OS=Homo sapiens OX=9606 GN=FES PE=1 SV=1
1182	3183	tr|E7EW84|E7EW84_HUMAN	62.83	6	0	0	5	4			1260000	447000	5	4	0	0	4	3		81852	Exocyst complex component OS=Homo sapiens OX=9606 GN=EXOC6 PE=1 SV=1
1182	3192	sp|Q8TAG9|EXOC6_HUMAN	62.83	5	0	0	4	3			1260000	447000	5	4	0	0	4	3		93722	Exocyst complex component 6 OS=Homo sapiens OX=9606 GN=EXOC6 PE=1 SV=3
1182	3274	tr|F2Z3K0|F2Z3K0_HUMAN	62.83	8	0	0	8	4			1260000	102000	4	3	0	0	4	2		46527	Exocyst complex component 6 OS=Homo sapiens OX=9606 GN=EXOC6 PE=1 SV=1
987	4486	tr|K7ELV5|K7ELV5_HUMAN	62.79	10	5	0	10	10					2	0	1	0	4	4		18812	Cyclin-dependent kinase 3 (Fragment) OS=Homo sapiens OX=9606 GN=CDK3 PE=1 SV=8
987	4497	sp|Q00526|CDK3_HUMAN	62.79	6	3	0	6	6					2	0	1	0	4	4		35046	Cyclin-dependent kinase 3 OS=Homo sapiens OX=9606 GN=CDK3 PE=1 SV=1
1241	3467	sp|Q07955|SRSF1_HUMAN	62.77	12	0	0	12	7			277000	707000	3	3	0	0	5	3		27745	Serine/arginine-rich splicing factor 1 OS=Homo sapiens OX=9606 GN=SRSF1 PE=1 SV=2
1241	3468	tr|J3KTL2|J3KTL2_HUMAN	62.77	11	0	0	11	7			277000	707000	3	3	0	0	5	3		28329	Serine/arginine-rich-splicing factor 1 OS=Homo sapiens OX=9606 GN=SRSF1 PE=1 SV=1
1141	2783	sp|Q14315|FLNC_HUMAN	62.75	2	0	0	2	1			3430000	2910000	7	2	0	0	9	2		291020	Filamin-C OS=Homo sapiens OX=9606 GN=FLNC PE=1 SV=3
1403	4008	tr|G5E9X5|G5E9X5_HUMAN	62.67	6	0	0	6	3			613000	298000	2	2	0	0	2	1		48216	Methylcrotonoyl-CoA carboxylase subunit alpha mitochondrial OS=Homo sapiens OX=9606 GN=MCCC1 PE=1 SV=1
1403	4009	tr|E9PG35|E9PG35_HUMAN	62.67	4	0	0	4	2			613000	298000	2	2	0	0	2	1		66468	Methylcrotonoyl-CoA carboxylase subunit alpha mitochondrial (Fragment) OS=Homo sapiens OX=9606 GN=MCCC1 PE=1 SV=1
1403	4010	sp|Q96RQ3|MCCA_HUMAN	62.67	3	0	0	3	2			613000	298000	2	2	0	0	2	1		80473	Methylcrotonoyl-CoA carboxylase subunit alpha mitochondrial OS=Homo sapiens OX=9606 GN=MCCC1 PE=1 SV=3
1403	4108	tr|E9PHF7|E9PHF7_HUMAN	62.67	4	0	0	4	2			613000	298000	2	2	0	0	2	1		68332	Methylcrotonoyl-CoA carboxylase subunit alpha mitochondrial OS=Homo sapiens OX=9606 GN=MCCC1 PE=1 SV=1
1403	4231	tr|F5GYT8|F5GYT8_HUMAN	62.67	4	0	0	4	2			613000	298000	2	2	0	0	2	1		64007	Methylcrotonoyl-CoA carboxylase subunit alpha mitochondrial OS=Homo sapiens OX=9606 GN=MCCC1 PE=1 SV=2
1207	3443	sp|Q9Y4X5|ARI1_HUMAN	62.57	6	0	0	6	4			1750000	1740000	3	3	0	0	3	2		64118	E3 ubiquitin-protein ligase ARIH1 OS=Homo sapiens OX=9606 GN=ARIH1 PE=1 SV=2
1366	3514	sp|Q7L9B9|EEPD1_HUMAN	62.5	6	0	0	2	6			589000	839000	3	3	0	0	1	3		62403	Endonuclease/exonuclease/phosphatase family domain-containing protein 1 OS=Homo sapiens OX=9606 GN=EEPD1 PE=1 SV=2
1445	4334	sp|Q9Y230|RUVB2_HUMAN	62.3	4	4	2	0	0	0	0			2	2	2	1	0	0		51157	RuvB-like 2 OS=Homo sapiens OX=9606 GN=RUVBL2 PE=1 SV=3
1503	3680	sp|Q7Z478|DHX29_HUMAN	62.28	2	0	0	2	0			76300		2	1	0	0	2	0	Carbamidomethylation	155235	ATP-dependent RNA helicase DHX29 OS=Homo sapiens OX=9606 GN=DHX29 PE=1 SV=2
1503	3681	tr|A0A087WYN9|A0A087WYN9_HUMAN	62.28	2	0	0	2	0			76300		2	1	0	0	2	0	Carbamidomethylation	155291	ATP-dependent RNA helicase DHX29 OS=Homo sapiens OX=9606 GN=DHX29 PE=1 SV=1
2093	5719	tr|A0A087WUL2|A0A087WUL2_HUMAN	62.2	11	0	0	11	0			93400		1	1	0	0	1	0		16161	Proteasome subunit beta type-3 (Fragment) OS=Homo sapiens OX=9606 GN=PSMB3 PE=1 SV=1
2093	5722	sp|P49720|PSB3_HUMAN	62.2	8	0	0	8	0			93400		1	1	0	0	1	0		22949	Proteasome subunit beta type-3 OS=Homo sapiens OX=9606 GN=PSMB3 PE=1 SV=2
1240	3207	sp|Q7Z5J4|RAI1_HUMAN	62.11	3	0	0	2	2			372000	467000	4	4	0	0	3	3		203350	Retinoic acid-induced protein 1 OS=Homo sapiens OX=9606 GN=RAI1 PE=1 SV=2
1240	3323	tr|A0A1W2PQJ7|A0A1W2PQJ7_HUMAN	62.11	2	0	0	1	1			324000	237000	3	3	0	0	2	2		183938	Retinoic acid-induced protein 1 OS=Homo sapiens OX=9606 GN=RAI1 PE=1 SV=1
1401	3889	sp|Q7Z417|NUFP2_HUMAN	62.1	4	0	0	4	4			728000	221000	2	2	0	0	2	2		76121	Nuclear fragile X mental retardation-interacting protein 2 OS=Homo sapiens OX=9606 GN=NUFIP2 PE=1 SV=1
1001	3797	tr|A0A024R4M0|A0A024R4M0_HUMAN	62.01	22	22	5	5	5	2120000	62600	172000	129000	5	5	6	1	1	1		22591	40S ribosomal protein S9 OS=Homo sapiens OX=9606 GN=RPS9 PE=1 SV=1
1001	3798	sp|P46781|RS9_HUMAN	62.01	22	22	5	5	5	2120000	62600	172000	129000	5	5	6	1	1	1		22591	40S ribosomal protein S9 OS=Homo sapiens OX=9606 GN=RPS9 PE=1 SV=3
1718	3863	tr|A0A0C4DFL8|A0A0C4DFL8_HUMAN	61.81	2	0	0	2	0			208000		1	1	0	0	1	0		121898	Lysine-specific demethylase 4B OS=Homo sapiens OX=9606 GN=KDM4B PE=1 SV=1
1718	3864	tr|F5GX28|F5GX28_HUMAN	61.81	2	0	0	2	0			208000		1	1	0	0	1	0		126083	Lysine-specific demethylase 4B OS=Homo sapiens OX=9606 GN=KDM4B PE=1 SV=2
1718	4120	sp|O94953|KDM4B_HUMAN	61.81	2	0	0	2	0			208000		1	1	0	0	1	0		121897	Lysine-specific demethylase 4B OS=Homo sapiens OX=9606 GN=KDM4B PE=1 SV=4
1502	3577	sp|O43516|WIPF1_HUMAN	61.71	14	0	0	14	0			2110000		5	5	0	0	6	0		51259	WAS/WASL-interacting protein family member 1 OS=Homo sapiens OX=9606 GN=WIPF1 PE=1 SV=3
1027	2970	sp|Q12788|TBL3_HUMAN	61.68	7	0	0	1	7			203000	774000	4	4	0	0	2	6	Deamidation (NQ)	89035	Transducin beta-like protein 3 OS=Homo sapiens OX=9606 GN=TBL3 PE=1 SV=2
1027	2979	tr|J3KNP2|J3KNP2_HUMAN	61.68	8	0	0	2	8			203000	774000	4	4	0	0	2	6	Deamidation (NQ)	77099	Transducin beta-like protein 3 (Fragment) OS=Homo sapiens OX=9606 GN=TBL3 PE=1 SV=1
1090	2588	sp|Q9UBT2|SAE2_HUMAN	61.58	7	0	0	7	4			4500000	3020000	5	5	0	0	5	3		71224	SUMO-activating enzyme subunit 2 OS=Homo sapiens OX=9606 GN=UBA2 PE=1 SV=2
1940	5007	sp|Q92610|ZN592_HUMAN	61.56	1	0	0	1	0			187000		1	1	0	0	1	0		137528	Zinc finger protein 592 OS=Homo sapiens OX=9606 GN=ZNF592 PE=1 SV=2
1940	5706	tr|H0YM74|H0YM74_HUMAN	61.56	1	0	0	1	0			187000		1	1	0	0	1	0		91982	Zinc finger protein 592 isoform CRA_b OS=Homo sapiens OX=9606 GN=ZNF592 PE=1 SV=1
1219	2774	sp|Q7Z6Z7|HUWE1_HUMAN	61.48	1	0	0	1	0			5180000	39200	6	5	0	0	5	2	Deamidation (NQ)	481896	E3 ubiquitin-protein ligase HUWE1 OS=Homo sapiens OX=9606 GN=HUWE1 PE=1 SV=3
2140	6184	tr|A0A0B4J213|A0A0B4J213_HUMAN	61.41	31	31	0	0	0	190000				1	1	1	0	0	0	Carbamidomethylation	5555	60S ribosomal protein L30 OS=Homo sapiens OX=9606 GN=RPL30 PE=1 SV=1
2140	6185	tr|A0A0C4DH44|A0A0C4DH44_HUMAN	61.41	17	17	0	0	0	190000				1	1	1	0	0	0	Carbamidomethylation	10505	60S ribosomal protein L30 OS=Homo sapiens OX=9606 GN=RPL30 PE=1 SV=1
2140	6186	tr|E5RI99|E5RI99_HUMAN	61.41	14	14	0	0	0	190000				1	1	1	0	0	0	Carbamidomethylation	12656	60S ribosomal protein L30 (Fragment) OS=Homo sapiens OX=9606 GN=RPL30 PE=1 SV=1
2140	6187	sp|P62888|RL30_HUMAN	61.41	14	14	0	0	0	190000				1	1	1	0	0	0	Carbamidomethylation	12784	60S ribosomal protein L30 OS=Homo sapiens OX=9606 GN=RPL30 PE=1 SV=2
1062	2863	sp|Q9H7D0|DOCK5_HUMAN	61.31	3	0	1	3	1			147000		6	1	0	1	5	5	Deamidation (NQ)	215307	Dedicator of cytokinesis protein 5 OS=Homo sapiens OX=9606 GN=DOCK5 PE=1 SV=3
1329	3378	sp|A3KMH1|VWA8_HUMAN	61.02	2	0	0	2	1	21700		269000	69400	4	4	1	0	3	2		214823	von Willebrand factor A domain-containing protein 8 OS=Homo sapiens OX=9606 GN=VWA8 PE=1 SV=2
1210	4561	sp|P08311|CATG_HUMAN	60.94	7	0	0	7	7			253000	629000	2	2	0	0	2	3		28837	Cathepsin G OS=Homo sapiens OX=9606 GN=CTSG PE=1 SV=2
1204	4147	sp|P49588|SYAC_HUMAN	60.8	2	0	0	2	2			246000	79200	2	1	0	0	3	2		106810	Alanine--tRNA ligase cytoplasmic OS=Homo sapiens OX=9606 GN=AARS PE=1 SV=2
1341	3144	sp|Q9Y2L9|LRCH1_HUMAN	60.78	6	0	0	6	0			340000		3	3	0	0	3	0		80875	Leucine-rich repeat and calponin homology domain-containing protein 1 OS=Homo sapiens OX=9606 GN=LRCH1 PE=1 SV=3
1364	3312	sp|Q9UKX7|NUP50_HUMAN	60.67	14	0	0	11	3			2040000	201000	5	5	0	0	4	2	Deamidation (NQ)	50144	Nuclear pore complex protein Nup50 OS=Homo sapiens OX=9606 GN=NUP50 PE=1 SV=2
981	3306	sp|Q9BZL6|KPCD2_HUMAN	60.62	3	0	0	3	2			1220000	560000	3	3	0	0	6	3	Carbamidomethylation	96722	Serine/threonine-protein kinase D2 OS=Homo sapiens OX=9606 GN=PRKD2 PE=1 SV=3
1037	3506	sp|P06702|S10A9_HUMAN	60.57	26	18	25	6	13	444000	1100000	255000	398000	4	4	2	4	1	1		13242	Protein S100-A9 OS=Homo sapiens OX=9606 GN=S100A9 PE=1 SV=1
1439	3668	tr|A0A1B0GUC3|A0A1B0GUC3_HUMAN	60.48	6	0	0	6	2			919000	153000	3	3	0	0	3	1		51803	Alpha-ketoglutarate-dependent dioxygenase FTO OS=Homo sapiens OX=9606 GN=FTO PE=1 SV=1
1439	3669	tr|A0A1B0GV98|A0A1B0GV98_HUMAN	60.48	5	0	0	5	2			919000	153000	3	3	0	0	3	1		52501	Alpha-ketoglutarate-dependent dioxygenase FTO OS=Homo sapiens OX=9606 GN=FTO PE=1 SV=1
1439	3670	tr|A0A1B0GTC5|A0A1B0GTC5_HUMAN	60.48	5	0	0	5	2			919000	153000	3	3	0	0	3	1		52799	Alpha-ketoglutarate-dependent dioxygenase FTO OS=Homo sapiens OX=9606 GN=FTO PE=1 SV=1
1439	3671	tr|A0A1B0GU26|A0A1B0GU26_HUMAN	60.48	5	0	0	5	2			919000	153000	3	3	0	0	3	1		55422	Alpha-ketoglutarate-dependent dioxygenase FTO OS=Homo sapiens OX=9606 GN=FTO PE=1 SV=1
1439	3676	sp|Q9C0B1|FTO_HUMAN	60.48	5	0	0	5	2			919000	153000	3	3	0	0	3	1		58282	Alpha-ketoglutarate-dependent dioxygenase FTO OS=Homo sapiens OX=9606 GN=FTO PE=1 SV=3
1439	3677	tr|A0A1B0GTC3|A0A1B0GTC3_HUMAN	60.48	5	0	0	5	2			919000	153000	3	3	0	0	3	1		61314	Alpha-ketoglutarate-dependent dioxygenase FTO OS=Homo sapiens OX=9606 GN=FTO PE=1 SV=1
1439	3678	tr|A0A1B0GVH5|A0A1B0GVH5_HUMAN	60.48	4	0	0	4	2			919000	153000	3	3	0	0	3	1		64148	Alpha-ketoglutarate-dependent dioxygenase FTO OS=Homo sapiens OX=9606 GN=FTO PE=1 SV=1
1439	4234	tr|A0A1B0GTY1|A0A1B0GTY1_HUMAN	60.48	4	0	0	4	2			473000	153000	2	2	0	0	2	1		48605	Alpha-ketoglutarate-dependent dioxygenase FTO OS=Homo sapiens OX=9606 GN=FTO PE=1 SV=1
1099	4283	sp|A0A075B6Q5|HV364_HUMAN	60.26	15	15	15	0	0	189000	138000			2	1	3	3	0	0		12891	Immunoglobulin heavy variable 3-64 OS=Homo sapiens OX=9606 GN=IGHV3-64 PE=3 SV=1
993	4592	sp|P01825|HV459_HUMAN	60.13	34	29	21	0	0	3080000	1010000			6	2	6	4	0	0	Carbamidomethylation	12936	Immunoglobulin heavy variable 4-59 OS=Homo sapiens OX=9606 GN=IGHV4-59 PE=1 SV=2
993	4593	sp|A0A0C4DH41|HV461_HUMAN	60.13	33	29	20	0	0	3080000	1010000			6	2	6	4	0	0	Carbamidomethylation	13066	Immunoglobulin heavy variable 4-61 OS=Homo sapiens OX=9606 GN=IGHV4-61 PE=3 SV=1
562	2813	sp|Q3KP31|ZN791_HUMAN	60.08	7	0	0	7	3			4380		4	2	0	0	10	22	Carbamidomethylation	66872	Zinc finger protein 791 OS=Homo sapiens OX=9606 GN=ZNF791 PE=2 SV=1
1169	3579	sp|O15294|OGT1_HUMAN	59.99	3	0	0	2	3			396000	294000	3	3	0	0	3	6		116924	UDP-N-acetylglucosamine--peptide N-acetylglucosaminyltransferase 110 kDa subunit OS=Homo sapiens OX=9606 GN=OGT PE=1 SV=3
1267	3362	sp|P52756|RBM5_HUMAN	59.53	4	0	0	4	3			216000	81200	3	2	0	0	3	2		92154	RNA-binding protein 5 OS=Homo sapiens OX=9606 GN=RBM5 PE=1 SV=2
1050	4102	sp|P62851|RS25_HUMAN	59.46	21	21	15	0	0	1490000	980000			3	3	5	3	0	0		13742	40S ribosomal protein S25 OS=Homo sapiens OX=9606 GN=RPS25 PE=1 SV=1
1645	4634	tr|H7C2W9|H7C2W9_HUMAN	58.82	21	21	0	0	0	362000				2	2	2	0	0	0		12820	60S ribosomal protein L31 (Fragment) OS=Homo sapiens OX=9606 GN=RPL31 PE=1 SV=1
1645	4635	tr|C9JU56|C9JU56_HUMAN	58.82	20	20	0	0	0	362000				2	2	2	0	0	0		13336	60S ribosomal protein L31 (Fragment) OS=Homo sapiens OX=9606 GN=RPL31 PE=1 SV=1
1645	4636	tr|B7Z4E3|B7Z4E3_HUMAN	58.82	19	19	0	0	0	362000				2	2	2	0	0	0		13955	cDNA FLJ58908 highly similar to 60S ribosomal protein L31 OS=Homo sapiens OX=9606 GN=RPL31 PE=1 SV=1
1645	4637	sp|P62899|RL31_HUMAN	58.82	18	18	0	0	0	362000				2	2	2	0	0	0		14463	60S ribosomal protein L31 OS=Homo sapiens OX=9606 GN=RPL31 PE=1 SV=1
1645	4638	tr|B7Z4C8|B7Z4C8_HUMAN	58.82	18	18	0	0	0	362000				2	2	2	0	0	0		15119	cDNA FLJ57527 highly similar to 60S ribosomal protein L31 OS=Homo sapiens OX=9606 GN=RPL31 PE=1 SV=1
1413	3464	sp|Q9Y6X3|SCC4_HUMAN	58.79	4	0	0	3	4			598000	1250000	3	3	0	0	2	3		69082	MAU2 chromatid cohesion factor homolog OS=Homo sapiens OX=9606 GN=MAU2 PE=1 SV=2
563	3293	sp|Q08ER8|ZN543_HUMAN	58.76	6	0	0	6	3			167000		3	1	0	0	9	22	Carbamidomethylation	68404	Zinc finger protein 543 OS=Homo sapiens OX=9606 GN=ZNF543 PE=1 SV=3
1634	5277	tr|Q5VVC8|Q5VVC8_HUMAN	58.76	13	13	0	8	0	515000		46700		2	2	2	0	1	0		19024	60S ribosomal protein L11 OS=Homo sapiens OX=9606 GN=RPL11 PE=1 SV=2
1634	5278	sp|P62913|RL11_HUMAN	58.76	12	12	0	8	0	515000		46700		2	2	2	0	1	0		20252	60S ribosomal protein L11 OS=Homo sapiens OX=9606 GN=RPL11 PE=1 SV=2
1280	2971	tr|B5MCF9|B5MCF9_HUMAN	58.74	6	0	0	3	5			657000	1340000	4	4	0	0	2	3		66078	Pescadillo homolog OS=Homo sapiens OX=9606 GN=PES1 PE=1 SV=1
1280	2972	sp|O00541|PESC_HUMAN	58.74	6	0	0	3	4			657000	1340000	4	4	0	0	2	3		68003	Pescadillo homolog OS=Homo sapiens OX=9606 GN=PES1 PE=1 SV=1
1153	3485	sp|P18583|SON_HUMAN	58.55	1	0	0	1	1			954000	134000	3	3	0	0	4	2	Acetylation (Protein N-term)	263827	Protein SON OS=Homo sapiens OX=9606 GN=SON PE=1 SV=4
1435	3147	sp|P42357|HUTH_HUMAN	58.49	7	1	6	0	0	52300	186000			5	5	1	4	0	0	Deamidation (NQ)	72698	Histidine ammonia-lyase OS=Homo sapiens OX=9606 GN=HAL PE=1 SV=1
1107	4087	sp|P0DOY3|IGLC3_HUMAN	58.4	18	9	9	18	18	79700	149000	472000	390000	2	1	2	1	2	2	Carbamidomethylation	11266	Immunoglobulin lambda constant 3 OS=Homo sapiens OX=9606 GN=IGLC3 PE=1 SV=1
1107	4088	sp|P0DOY2|IGLC2_HUMAN	58.4	18	9	9	18	18	79700	149000	472000	390000	2	1	2	1	2	2	Carbamidomethylation	11294	Immunoglobulin lambda constant 2 OS=Homo sapiens OX=9606 GN=IGLC2 PE=1 SV=1
1426	3423	tr|J3QRU8|J3QRU8_HUMAN	58.35	6	0	0	4	4			738000	417000	3	3	0	0	2	2		76806	ARF GTPase-activating protein GIT1 OS=Homo sapiens OX=9606 GN=GIT1 PE=1 SV=1
1426	3424	tr|A0A0C4DGN6|A0A0C4DGN6_HUMAN	58.35	5	0	0	4	3			738000	417000	3	3	0	0	2	2		83132	ARF GTPase-activating protein GIT1 OS=Homo sapiens OX=9606 GN=GIT1 PE=1 SV=1
1426	3425	sp|Q9Y2X7|GIT1_HUMAN	58.35	5	0	0	4	3			738000	417000	3	3	0	0	2	2		84341	ARF GTPase-activating protein GIT1 OS=Homo sapiens OX=9606 GN=GIT1 PE=1 SV=2
1543	4106	sp|Q8WVV4|POF1B_HUMAN	58.15	4	0	2	0	4		88900		208000	2	2	0	2	0	2		68065	Protein POF1B OS=Homo sapiens OX=9606 GN=POF1B PE=1 SV=3
1349	3327	sp|Q00341|VIGLN_HUMAN	58.01	4	0	0	3	1			678000	133000	4	4	0	0	3	1		141455	Vigilin OS=Homo sapiens OX=9606 GN=HDLBP PE=1 SV=2
1349	3328	tr|A0A024R4E5|A0A024R4E5_HUMAN	58.01	4	0	0	3	1			678000	133000	4	4	0	0	3	1		141439	High density lipoprotein binding protein (Vigilin) isoform CRA_a OS=Homo sapiens OX=9606 GN=HDLBP PE=1 SV=1
1324	3585	sp|Q93074|MED12_HUMAN	57.86	2	0	0	1	2			39100	146000	4	3	0	0	1	4		243079	Mediator of RNA polymerase II transcription subunit 12 OS=Homo sapiens OX=9606 GN=MED12 PE=1 SV=4
1324	3606	tr|Q7Z3Z5|Q7Z3Z5_HUMAN	57.86	1	0	0	1	1			39100	85300	3	2	0	0	1	3		226321	Mediator of RNA polymerase II transcription subunit 12 OS=Homo sapiens OX=9606 GN=MED12 PE=1 SV=1
959	2952	sp|Q68CQ4|DIEXF_HUMAN	57.72	7	0	0	6	4			849000	286000	6	6	0	0	9	4		87055	Digestive organ expansion factor homolog OS=Homo sapiens OX=9606 GN=DIEXF PE=1 SV=2
1531	4608	tr|A0A1B0GTU4|A0A1B0GTU4_HUMAN	57.58	2	0	0	2	2			586000	1300000	2	2	0	0	1	3		115906	Paxillin OS=Homo sapiens OX=9606 GN=PXN PE=1 SV=1
1531	4631	tr|F5GZ78|F5GZ78_HUMAN	57.58	4	0	0	3	4			586000	1300000	2	2	0	0	1	3		64233	Paxillin OS=Homo sapiens OX=9606 GN=PXN PE=1 SV=1
1531	4632	sp|P49023|PAXI_HUMAN	57.58	4	0	0	3	4			586000	1300000	2	2	0	0	1	3		64505	Paxillin OS=Homo sapiens OX=9606 GN=PXN PE=1 SV=3
1531	5020	tr|A0A1B0GU60|A0A1B0GU60_HUMAN	57.58	3	0	0	3	3			586000	937000	1	1	0	0	1	1		75036	Paxillin OS=Homo sapiens OX=9606 GN=PXN PE=1 SV=1
1531	6181	tr|F5H836|F5H836_HUMAN	57.58	10	0	0	10	10			586000	937000	1	1	0	0	1	1		18777	Paxillin (Fragment) OS=Homo sapiens OX=9606 GN=PXN PE=1 SV=8
1462	4506	tr|Q5TB53|Q5TB53_HUMAN	57.53	8	0	0	8	3			805000	722000	2	2	0	0	2	1	Carbamidomethylation	29881	Transmembrane 9 superfamily member (Fragment) OS=Homo sapiens OX=9606 GN=TM9SF3 PE=1 SV=8
1462	4510	sp|Q9HD45|TM9S3_HUMAN	57.53	3	0	0	3	1			805000	722000	2	2	0	0	2	1	Carbamidomethylation	67888	Transmembrane 9 superfamily member 3 OS=Homo sapiens OX=9606 GN=TM9SF3 PE=1 SV=2
1208	5901	tr|A0A075B7D0|A0A075B7D0_HUMAN	57.44	9	9	9	0	0	10500000	2110000			1	1	3	2	0	0	Carbamidomethylation	13012	Immunoglobulin heavy variable 1/OR15-1 (non-functional) (Fragment) OS=Homo sapiens OX=9606 GN=IGHV1OR15-1 PE=1 SV=1
1342	3247	tr|F8W1F5|F8W1F5_HUMAN	57.34	3	0	0	3	1			172000		3	2	0	0	4	1		117084	Formin-like protein 3 OS=Homo sapiens OX=9606 GN=FMNL3 PE=1 SV=1
1342	3248	sp|Q8IVF7|FMNL3_HUMAN	57.34	3	0	0	3	1			172000		3	2	0	0	4	1		117213	Formin-like protein 3 OS=Homo sapiens OX=9606 GN=FMNL3 PE=1 SV=3
1428	3761	sp|Q8N1G2|CMTR1_HUMAN	57.33	3	0	0	1	3			236000	326000	2	2	0	0	1	2		95321	Cap-specific mRNA (nucleoside-2'-O-)-methyltransferase 1 OS=Homo sapiens OX=9606 GN=CMTR1 PE=1 SV=1
1417	3801	sp|Q9NPH3|IL1AP_HUMAN	57.3	4	0	0	4	2			210000	65100	2	2	0	0	2	1		65419	Interleukin-1 receptor accessory protein OS=Homo sapiens OX=9606 GN=IL1RAP PE=1 SV=2
1269	5180	sp|P62266|RS23_HUMAN	57.28	8	8	0	8	8	348000		219000	166000	1	1	1	0	2	2		15808	40S ribosomal protein S23 OS=Homo sapiens OX=9606 GN=RPS23 PE=1 SV=3
2139	6182	tr|A0A3B3ISH6|A0A3B3ISH6_HUMAN	57.25	3	0	0	3	0			30400		1	1	0	0	1	0		49714	Nucleolar protein 9 (Fragment) OS=Homo sapiens OX=9606 GN=NOP9 PE=1 SV=1
2139	6183	sp|Q86U38|NOP9_HUMAN	57.25	2	0	0	2	0			30400		1	1	0	0	1	0		69438	Nucleolar protein 9 OS=Homo sapiens OX=9606 GN=NOP9 PE=1 SV=1
1594	5078	sp|Q6UW63|PLGT2_HUMAN	57.18	2	0	0	0	2				475000	1	1	0	0	0	2		58043	Protein O-glucosyltransferase 2 OS=Homo sapiens OX=9606 GN=KDELC1 PE=1 SV=1
1606	4324	tr|J3KPY9|J3KPY9_HUMAN	56.97	6	0	0	3	3			110000	1110000	2	2	0	0	1	1		44841	Anthrax toxin receptor OS=Homo sapiens OX=9606 GN=ANTXR2 PE=1 SV=1
1606	4325	sp|P58335|ANTR2_HUMAN	56.97	5	0	0	2	3			110000	1110000	2	2	0	0	1	1		53666	Anthrax toxin receptor 2 OS=Homo sapiens OX=9606 GN=ANTXR2 PE=1 SV=5
1193	3304	tr|K7EK35|K7EK35_HUMAN	56.92	4	0	0	2	4			237000	353000	3	3	0	0	2	4		87362	Signal transducer and activator of transcription OS=Homo sapiens OX=9606 GN=STAT5A PE=1 SV=1
1193	3305	sp|P42229|STA5A_HUMAN	56.92	3	0	0	2	3			237000	353000	3	3	0	0	2	4		90647	Signal transducer and activator of transcription 5A OS=Homo sapiens OX=9606 GN=STAT5A PE=1 SV=1
1449	4078	tr|A0A0C4DGS1|A0A0C4DGS1_HUMAN	56.91	7	7	2	0	0	635000	172000			3	3	3	1	0	0		48799	Dolichyl-diphosphooligosaccharide--protein glycosyltransferase 48 kDa subunit OS=Homo sapiens OX=9606 GN=DDOST PE=1 SV=1
1449	4079	sp|P39656|OST48_HUMAN	56.91	7	7	2	0	0	635000	172000			3	3	3	1	0	0		50801	Dolichyl-diphosphooligosaccharide--protein glycosyltransferase 48 kDa subunit OS=Homo sapiens OX=9606 GN=DDOST PE=1 SV=4
1946	5353	tr|F5H0C8|F5H0C8_HUMAN	56.9	4	4	0	0	0	762000				1	1	1	0	0	0		34762	Gamma-enolase OS=Homo sapiens OX=9606 GN=ENO2 PE=1 SV=1
1946	5354	sp|P09104|ENOG_HUMAN	56.9	3	3	0	0	0	762000				1	1	1	0	0	0		47269	Gamma-enolase OS=Homo sapiens OX=9606 GN=ENO2 PE=1 SV=3
1946	5830	tr|F5H1C3|F5H1C3_HUMAN	56.9	13	13	0	0	0	762000				1	1	1	0	0	0		11203	Gamma-enolase (Fragment) OS=Homo sapiens OX=9606 GN=ENO2 PE=1 SV=1
1425	3107	tr|A0A087WUT0|A0A087WUT0_HUMAN	56.57	5	0	0	0	5				1810000	3	3	0	0	0	3		58686	Myelin expression factor 2 OS=Homo sapiens OX=9606 GN=MYEF2 PE=1 SV=1
1425	3112	sp|Q9P2K5|MYEF2_HUMAN	56.57	4	0	0	0	4				1810000	3	3	0	0	0	3		64122	Myelin expression factor 2 OS=Homo sapiens OX=9606 GN=MYEF2 PE=1 SV=3
1425	3113	tr|A0A0A0MR39|A0A0A0MR39_HUMAN	56.57	4	0	0	0	4				1810000	3	3	0	0	0	3		64150	Myelin expression factor 2 isoform CRA_a OS=Homo sapiens OX=9606 GN=MYEF2 PE=1 SV=1
1425	3130	tr|A0A0A0MQW0|A0A0A0MQW0_HUMAN	56.57	5	0	0	0	5				1810000	3	3	0	0	0	3		61957	Myelin expression factor 2 isoform CRA_b OS=Homo sapiens OX=9606 GN=MYEF2 PE=1 SV=1
1308	3530	sp|Q5T4S7|UBR4_HUMAN	56.15	1	0	0	1	1			831000	52100	5	4	0	0	4	3	Deamidation (NQ)	573849	E3 ubiquitin-protein ligase UBR4 OS=Homo sapiens OX=9606 GN=UBR4 PE=1 SV=1
1242	3790	sp|O75582|KS6A5_HUMAN	55.93	2	0	0	2	1			44600		2	1	0	0	2	4		89865	Ribosomal protein S6 kinase alpha-5 OS=Homo sapiens OX=9606 GN=RPS6KA5 PE=1 SV=1
1242	4291	tr|A0A3B3ISL8|A0A3B3ISL8_HUMAN	55.93	9	0	0	9	4			44600		2	1	0	0	2	4		22976	Ribosomal protein S6 kinase alpha-5 OS=Homo sapiens OX=9606 GN=RPS6KA5 PE=1 SV=1
1242	4292	tr|G3V2D1|G3V2D1_HUMAN	55.93	8	0	0	8	4			44600		2	1	0	0	2	4		24412	Ribosomal protein S6 kinase alpha-5 OS=Homo sapiens OX=9606 GN=RPS6KA5 PE=1 SV=1
1135	2864	sp|Q8N5C6|SRBD1_HUMAN	55.89	5	0	0	4	4			1210000	698000	6	6	0	0	4	4	Carbamidomethylation	111776	S1 RNA-binding domain-containing protein 1 OS=Homo sapiens OX=9606 GN=SRBD1 PE=1 SV=2
1914	4361	tr|A0A0C4DG17|A0A0C4DG17_HUMAN	55.87	12	12	0	3	3	1110000		296000	304000	3	3	3	0	1	1	Carbamidomethylation	33314	40S ribosomal protein SA OS=Homo sapiens OX=9606 GN=RPSA PE=1 SV=1
1914	4367	tr|C9J9K3|C9J9K3_HUMAN	55.87	14	14	0	3	3	1110000		296000	304000	3	3	3	0	1	1	Carbamidomethylation	29405	40S ribosomal protein SA (Fragment) OS=Homo sapiens OX=9606 GN=RPSA PE=1 SV=8
1914	4368	sp|P08865|RSSA_HUMAN	55.87	12	12	0	3	3	1110000		296000	304000	3	3	3	0	1	1	Carbamidomethylation	32854	40S ribosomal protein SA OS=Homo sapiens OX=9606 GN=RPSA PE=1 SV=4
1914	6240	tr|F8WD59|F8WD59_HUMAN	55.87	15	15	0	0	0	242000				1	1	1	0	0	0		12648	40S ribosomal protein SA (Fragment) OS=Homo sapiens OX=9606 GN=RPSA PE=1 SV=2
977	5451	tr|A0A0B4J2B8|A0A0B4J2B8_HUMAN	55.8	9	9	9	0	0	4790000	5240000			1	1	4	4	0	0	Carbamidomethylation; Oxidation (M)	12954	Immunoglobulin heavy variable 1/OR15-9 (non-functional) (Fragment) OS=Homo sapiens OX=9606 GN=IGHV1OR15-9 PE=4 SV=1
977	6228	tr|A0A087WYE8|A0A087WYE8_HUMAN	55.8	9	9	9	0	0	4790000	5240000			1	1	4	4	0	0	Carbamidomethylation; Oxidation (M)	13023	Immunoglobulin heavy variable 1/OR21-1 (non-functional) (Fragment) OS=Homo sapiens OX=9606 GN=IGHV1OR21-1 PE=1 SV=1
1440	3835	tr|D6RJG6|D6RJG6_HUMAN	55.72	5	0	0	5	3			1180000	971000	2	1	0	0	2	1		43130	Myocyte-specific enhancer factor 2C OS=Homo sapiens OX=9606 GN=MEF2C PE=1 SV=1
1440	3985	tr|A0A0R4J2G5|A0A0R4J2G5_HUMAN	55.72	5	0	0	5	2			1180000	971000	2	1	0	0	2	1		46987	Myocyte-specific enhancer factor 2C OS=Homo sapiens OX=9606 GN=MEF2C PE=1 SV=1
1440	4235	tr|A0A1B0GV32|A0A1B0GV32_HUMAN	55.72	5	0	0	5	2			1180000	971000	2	1	0	0	2	1		50064	Myocyte-specific enhancer factor 2C OS=Homo sapiens OX=9606 GN=MEF2C PE=1 SV=1
1440	4236	sp|Q06413|MEF2C_HUMAN	55.72	4	0	0	4	2			1180000	971000	2	1	0	0	2	1		51221	Myocyte-specific enhancer factor 2C OS=Homo sapiens OX=9606 GN=MEF2C PE=1 SV=1
1440	4576	tr|A0A1B0GTW4|A0A1B0GTW4_HUMAN	55.72	17	0	0	17	8			1180000	971000	2	1	0	0	2	1		14272	Myocyte-specific enhancer factor 2C (Fragment) OS=Homo sapiens OX=9606 GN=MEF2C PE=1 SV=1
1440	4577	tr|D6RG21|D6RG21_HUMAN	55.72	17	0	0	17	8			1180000	971000	2	1	0	0	2	1		14614	Myocyte-specific enhancer factor 2C (Fragment) OS=Homo sapiens OX=9606 GN=MEF2C PE=1 SV=1
1440	4578	tr|D6RCM6|D6RCM6_HUMAN	55.72	16	0	0	16	8			1180000	971000	2	1	0	0	2	1		14945	Myocyte-specific enhancer factor 2C (Fragment) OS=Homo sapiens OX=9606 GN=MEF2C PE=1 SV=1
1440	4579	tr|D6RJA7|D6RJA7_HUMAN	55.72	11	0	0	11	5			1180000	971000	2	1	0	0	2	1		21836	Myocyte-specific enhancer factor 2C (Fragment) OS=Homo sapiens OX=9606 GN=MEF2C PE=1 SV=2
1246	3309	sp|Q9HAU5|RENT2_HUMAN	55.55	4	0	0	3	3			830000	319000	6	6	0	0	5	4		147810	Regulator of nonsense transcripts 2 OS=Homo sapiens OX=9606 GN=UPF2 PE=1 SV=1
1568	5028	sp|Q6NUM9|RETST_HUMAN	55.51	3	0	0	3	3			408000	332000	1	1	0	0	1	1		66820	All-trans-retinol 13 14-reductase OS=Homo sapiens OX=9606 GN=RETSAT PE=1 SV=2
1568	5134	tr|H7BZ16|H7BZ16_HUMAN	55.51	6	0	0	6	6			408000	332000	1	1	0	0	1	1		28056	All-trans-retinol 13 14-reductase (Fragment) OS=Homo sapiens OX=9606 GN=RETSAT PE=1 SV=1
1568	5347	tr|H7C3J0|H7C3J0_HUMAN	55.51	4	0	0	4	4			408000	332000	1	1	0	0	1	1		43826	All-trans-retinol 13 14-reductase (Fragment) OS=Homo sapiens OX=9606 GN=RETSAT PE=1 SV=1
1568	5721	tr|H7BZ81|H7BZ81_HUMAN	55.51	5	0	0	5	5			408000	332000	1	1	0	0	1	1		35190	All-trans-retinol 13 14-reductase (Fragment) OS=Homo sapiens OX=9606 GN=RETSAT PE=1 SV=1
1780	3757	sp|Q5M775|CYTSB_HUMAN	55.5	3	0	0	2	1			313000		3	2	0	0	2	1		118585	Cytospin-B OS=Homo sapiens OX=9606 GN=SPECC1 PE=1 SV=1
1780	5916	tr|J3QS22|J3QS22_HUMAN	55.5	11	0	0	11	0			290000		1	1	0	0	1	0		13875	Cytospin-B (Fragment) OS=Homo sapiens OX=9606 GN=SPECC1 PE=1 SV=8
1780	6189	tr|J3KTI9|J3KTI9_HUMAN	55.5	14	0	0	14	0			290000		1	1	0	0	1	0		10472	Cytospin-B (Fragment) OS=Homo sapiens OX=9606 GN=SPECC1 PE=1 SV=2
1780	6190	tr|J3QRQ9|J3QRQ9_HUMAN	55.5	14	0	0	14	0			290000		1	1	0	0	1	0		10628	Cytospin-B (Fragment) OS=Homo sapiens OX=9606 GN=SPECC1 PE=1 SV=1
1125	3554	tr|F6WR09|F6WR09_HUMAN	55.33	3	0	0	2	3			1460000	1390000	3	3	0	0	3	4		105703	Zinc finger MIZ domain-containing protein 1 OS=Homo sapiens OX=9606 GN=ZMIZ1 PE=1 SV=1
1125	3556	sp|Q9ULJ6|ZMIZ1_HUMAN	55.33	2	0	0	1	2			1460000	1390000	3	3	0	0	3	4		115483	Zinc finger MIZ domain-containing protein 1 OS=Homo sapiens OX=9606 GN=ZMIZ1 PE=1 SV=3
1345	3896	sp|Q86U06|RBM23_HUMAN	55.28	10	8	2	3	3	257000	104000	101000	33900	3	3	2	1	1	1	Carbamidomethylation; Oxidation (M)	48731	Probable RNA-binding protein 23 OS=Homo sapiens OX=9606 GN=RBM23 PE=1 SV=1
1565	4995	sp|Q9BZQ8|NIBAN_HUMAN	55	2	0	0	2	0			239000		1	1	0	0	2	0		103135	Protein Niban OS=Homo sapiens OX=9606 GN=FAM129A PE=1 SV=1
1414	3630	sp|P36915|GNL1_HUMAN	54.97	5	0	0	3	5			456000	530000	3	3	0	0	2	3		68661	Guanine nucleotide-binding protein-like 1 OS=Homo sapiens OX=9606 GN=GNL1 PE=1 SV=2
1414	3646	tr|A0A140T8Y2|A0A140T8Y2_HUMAN	54.97	8	0	0	5	8			456000	530000	3	3	0	0	2	3		44787	Guanine nucleotide-binding protein-like 1 (Fragment) OS=Homo sapiens OX=9606 GN=GNL1 PE=1 SV=1
1365	3439	sp|Q96QA5|GSDMA_HUMAN	54.97	7	3	4	0	0	56000	114000			3	3	1	2	0	0		49365	Gasdermin-A OS=Homo sapiens OX=9606 GN=GSDMA PE=1 SV=4
1365	3455	tr|J3KRG2|J3KRG2_HUMAN	54.97	19	9	10	0	0	56000	114000			3	3	1	2	0	0		17791	Gasdermin-A (Fragment) OS=Homo sapiens OX=9606 GN=GSDMA PE=1 SV=8
1302	4290	sp|Q14166|TTL12_HUMAN	54.91	4	0	0	4	2			30100	0	2	2	0	0	3	1		74404	Tubulin--tyrosine ligase-like protein 12 OS=Homo sapiens OX=9606 GN=TTLL12 PE=1 SV=2
1036	3098	sp|Q12797|ASPH_HUMAN	54.89	5	0	0	5	5			655000	264000	4	3	0	0	5	5		85863	Aspartyl/asparaginyl beta-hydroxylase OS=Homo sapiens OX=9606 GN=ASPH PE=1 SV=3
1248	3504	sp|Q96PU4|UHRF2_HUMAN	54.82	6	0	0	3	5			503000	453000	4	4	0	0	2	5	Carbamidomethylation	89985	E3 ubiquitin-protein ligase UHRF2 OS=Homo sapiens OX=9606 GN=UHRF2 PE=1 SV=1
1348	3149	sp|O15067|PUR4_HUMAN	54.66	3	0	0	3	1			231000	1160000	4	4	0	0	3	1		144734	Phosphoribosylformylglycinamidine synthase OS=Homo sapiens OX=9606 GN=PFAS PE=1 SV=4
1540	3830	sp|Q8IUI8|CRLF3_HUMAN	54.5	9	0	0	9	0			1340000		3	3	0	0	4	0	Carbamidomethylation; Acetylation (Protein N-term); Oxidation (M)	49766	Cytokine receptor-like factor 3 OS=Homo sapiens OX=9606 GN=CRLF3 PE=1 SV=2
1195	3952	tr|A0A0D9SEJ8|A0A0D9SEJ8_HUMAN	54.34	4	0	0	4	4			815000	312000	2	1	0	0	2	3	Carbamidomethylation	61526	Suppressor of hairy wing homolog 2 (Drosophila) isoform CRA_b OS=Homo sapiens OX=9606 GN=ZNF280B PE=1 SV=1
1195	3953	sp|Q86YH2|Z280B_HUMAN	54.34	4	0	0	4	4			815000	312000	2	1	0	0	2	3	Carbamidomethylation	61584	Zinc finger protein 280B OS=Homo sapiens OX=9606 GN=ZNF280B PE=1 SV=2
1088	2885	tr|F5H1R4|F5H1R4_HUMAN	54.29	5	0	0	4	2			642000	134000	5	5	0	0	5	3		112472	Rho GTPase-activating protein 45 OS=Homo sapiens OX=9606 GN=ARHGAP45 PE=1 SV=1
1088	2892	sp|Q92619|HMHA1_HUMAN	54.29	5	0	0	3	2			642000	134000	5	5	0	0	5	3		124614	Rho GTPase-activating protein 45 OS=Homo sapiens OX=9606 GN=ARHGAP45 PE=1 SV=2
1088	2894	tr|K7ES98|K7ES98_HUMAN	54.29	5	0	0	3	2			642000	134000	5	5	0	0	5	3		125054	Rho GTPase-activating protein 45 OS=Homo sapiens OX=9606 GN=ARHGAP45 PE=1 SV=1
1088	2895	tr|K7EM85|K7EM85_HUMAN	54.29	4	0	0	3	2			642000	134000	5	5	0	0	5	3		127605	Rho GTPase-activating protein 45 OS=Homo sapiens OX=9606 GN=ARHGAP45 PE=1 SV=1
1442	4099	sp|O75563|SKAP2_HUMAN	54.29	6	0	0	6	3			1150000	662000	2	2	0	0	2	1		41217	Src kinase-associated phosphoprotein 2 OS=Homo sapiens OX=9606 GN=SKAP2 PE=1 SV=1
1192	3181	sp|Q75QN2|INT8_HUMAN	54.28	3	0	0	3	3			1040000	381000	4	4	0	0	4	3		113088	Integrator complex subunit 8 OS=Homo sapiens OX=9606 GN=INTS8 PE=1 SV=1
1323	3567	sp|O15357|SHIP2_HUMAN	54.25	3	0	1	2	0		1280000	250000		4	4	0	1	3	0	Deamidation (NQ)	138599	Phosphatidylinositol 3 4 5-trisphosphate 5-phosphatase 2 OS=Homo sapiens OX=9606 GN=INPPL1 PE=1 SV=2
1404	4029	sp|Q9H9Y6|RPA2_HUMAN	54.23	2	0	0	2	1			317000	42700	2	2	0	0	2	1		128229	DNA-directed RNA polymerase I subunit RPA2 OS=Homo sapiens OX=9606 GN=POLR1B PE=1 SV=2
1404	4140	tr|H7C0D9|H7C0D9_HUMAN	54.23	7	0	0	7	4			317000	42700	2	2	0	0	2	1		34287	DNA-directed RNA polymerase I subunit RPA2 (Fragment) OS=Homo sapiens OX=9606 GN=POLR1B PE=1 SV=8
1360	3659	tr|B9ZVN9|B9ZVN9_HUMAN	54.06	1	0	0	1	1			95000		2	1	0	0	2	1		187807	DNA-directed RNA polymerase subunit OS=Homo sapiens OX=9606 GN=POLR1A PE=1 SV=1
1360	3660	sp|O95602|RPA1_HUMAN	54.06	1	0	0	1	1			95000		2	1	0	0	2	1		194810	DNA-directed RNA polymerase I subunit RPA1 OS=Homo sapiens OX=9606 GN=POLR1A PE=1 SV=2
1603	3961	sp|Q15582|BGH3_HUMAN	54.04	4	0	0	0	4				827000	2	2	0	0	0	2		74681	Transforming growth factor-beta-induced protein ig-h3 OS=Homo sapiens OX=9606 GN=TGFBI PE=1 SV=1
1385	3910	sp|Q99460|PSMD1_HUMAN	53.81	3	0	1	2	1		134000	523000	202000	3	3	0	1	2	1	Deamidation (NQ)	105836	26S proteasome non-ATPase regulatory subunit 1 OS=Homo sapiens OX=9606 GN=PSMD1 PE=1 SV=2
1385	3911	tr|A0A087WW66|A0A087WW66_HUMAN	53.81	3	0	1	2	1		134000	523000	202000	3	3	0	1	2	1	Deamidation (NQ)	105851	26S proteasome non-ATPase regulatory subunit 1 OS=Homo sapiens OX=9606 GN=PSMD1 PE=1 SV=1
1255	3266	sp|Q9H9A6|LRC40_HUMAN	53.74	6	0	0	1	6			0	871000	4	4	0	0	1	6		68250	Leucine-rich repeat-containing protein 40 OS=Homo sapiens OX=9606 GN=LRRC40 PE=1 SV=1
1444	4298	tr|E9PKZ0|E9PKZ0_HUMAN	53.64	13	5	5	8	0	58300	65100	57400		2	2	1	1	2	0		22389	60S ribosomal protein L8 (Fragment) OS=Homo sapiens OX=9606 GN=RPL8 PE=1 SV=1
1444	4299	sp|P62917|RL8_HUMAN	53.64	11	4	4	6	0	58300	65100	57400		2	2	1	1	2	0		28025	60S ribosomal protein L8 OS=Homo sapiens OX=9606 GN=RPL8 PE=1 SV=2
1835	4725	sp|Q68E01|INT3_HUMAN	53.48	1	0	0	1	0			102000		1	1	0	0	1	0		118070	Integrator complex subunit 3 OS=Homo sapiens OX=9606 GN=INTS3 PE=1 SV=1
1043	3486	tr|A0A1B0GW44|A0A1B0GW44_HUMAN	53.44	7	4	5	2	2	40700	193000	0	151000	3	3	3	2	1	1		43688	Cathepsin D OS=Homo sapiens OX=9606 GN=CTSD PE=1 SV=1
1043	3487	tr|A0A1B0GVP3|A0A1B0GVP3_HUMAN	53.44	7	4	5	2	2	40700	193000	0	151000	3	3	3	2	1	1		43687	Cathepsin D OS=Homo sapiens OX=9606 GN=CTSD PE=1 SV=1
1043	3488	tr|A0A1B0GV23|A0A1B0GV23_HUMAN	53.44	7	4	5	2	2	40700	193000	0	151000	3	3	3	2	1	1		43831	Cathepsin D OS=Homo sapiens OX=9606 GN=CTSD PE=1 SV=1
1043	3489	tr|A0A1B0GVD5|A0A1B0GVD5_HUMAN	53.44	7	4	5	2	2	40700	193000	0	151000	3	3	3	2	1	1		44238	Cathepsin D OS=Homo sapiens OX=9606 GN=CTSD PE=1 SV=1
1043	3490	tr|A0A1B0GWE8|A0A1B0GWE8_HUMAN	53.44	7	4	5	2	2	40700	193000	0	151000	3	3	3	2	1	1		44353	Cathepsin D OS=Homo sapiens OX=9606 GN=CTSD PE=1 SV=1
1043	3491	sp|P07339|CATD_HUMAN	53.44	7	4	5	2	2	40700	193000	0	151000	3	3	3	2	1	1		44552	Cathepsin D OS=Homo sapiens OX=9606 GN=CTSD PE=1 SV=1
1043	3502	tr|H7C1V0|H7C1V0_HUMAN	53.44	15	10	11	5	5	40700	193000	0	151000	3	3	3	2	1	1		20371	Cathepsin D (Fragment) OS=Homo sapiens OX=9606 GN=CTSD PE=1 SV=1
1438	3550	sp|Q9BSC4|NOL10_HUMAN	53.4	5	0	0	4	1			147000	264000	3	3	0	0	3	1	Oxidation (M)	80302	Nucleolar protein 10 OS=Homo sapiens OX=9606 GN=NOL10 PE=1 SV=1
1268	3913	tr|A0A1B0GVI7|A0A1B0GVI7_HUMAN	53.38	2	0	0	2	1			662000	40400	2	2	0	0	3	1		90582	Uncharacterized protein (Fragment) OS=Homo sapiens OX=9606 PE=4 SV=1
1268	3921	sp|P35869|AHR_HUMAN	53.38	2	0	0	2	1			662000	40400	2	2	0	0	3	1		96147	Aryl hydrocarbon receptor OS=Homo sapiens OX=9606 GN=AHR PE=1 SV=2
1268	3962	tr|A0A2R8Y7G1|A0A2R8Y7G1_HUMAN	53.38	2	0	0	2	1			662000	40400	2	2	0	0	3	1		94452	Aryl hydrocarbon receptor OS=Homo sapiens OX=9606 GN=AHR PE=1 SV=1
1628	4065	tr|A0A384DVU0|A0A384DVU0_HUMAN	53.36	2	0	0	2	0			561000		2	2	0	0	2	0		149923	Neuropathy target esterase OS=Homo sapiens OX=9606 GN=PNPLA6 PE=1 SV=1
1628	4066	sp|Q8IY17|PLPL6_HUMAN	53.36	2	0	0	2	0			561000		2	2	0	0	2	0		150953	Neuropathy target esterase OS=Homo sapiens OX=9606 GN=PNPLA6 PE=1 SV=3
1420	4080	sp|O75177|CREST_HUMAN	53.27	6	0	0	6	6			856000	1710000	2	2	0	0	2	2	Carbamidomethylation	42990	Calcium-responsive transactivator OS=Homo sapiens OX=9606 GN=SS18L1 PE=1 SV=2
1291	4474	tr|H7C2L4|H7C2L4_HUMAN	53.22	16	9	9	7	0	86700	222000	207000		2	2	1	2	1	0		12667	Transformer-2 protein homolog beta (Fragment) OS=Homo sapiens OX=9606 GN=TRA2B PE=1 SV=1
1291	4492	sp|P62995|TRA2B_HUMAN	53.22	6	3	3	2	0	86700	222000	207000		2	2	1	2	1	0		33666	Transformer-2 protein homolog beta OS=Homo sapiens OX=9606 GN=TRA2B PE=1 SV=1
1581	3637	sp|Q96PP8|GBP5_HUMAN	53.12	5	0	0	1	5			232000	561000	3	3	0	0	1	3		66617	Guanylate-binding protein 5 OS=Homo sapiens OX=9606 GN=GBP5 PE=1 SV=1
1581	3648	tr|E7ETN8|E7ETN8_HUMAN	53.12	6	0	0	2	6			232000	561000	3	3	0	0	1	3		54477	Guanylate-binding protein 5 (Fragment) OS=Homo sapiens OX=9606 GN=GBP5 PE=1 SV=1
1528	3901	sp|Q9UL54|TAOK2_HUMAN	53.08	2	0	0	2	1			58100		2	1	0	0	2	1		138251	Serine/threonine-protein kinase TAO2 OS=Homo sapiens OX=9606 GN=TAOK2 PE=1 SV=2
1077	3349	tr|A0A0A0MSU2|A0A0A0MSU2_HUMAN	53.01	4	0	1	3	3		93000	990000	480000	4	4	0	1	3	5	Oxidation (M)	111830	ELM2 and SANT domain-containing protein 1 (Fragment) OS=Homo sapiens OX=9606 GN=ELMSAN1 PE=1 SV=6
1077	3350	sp|Q6PJG2|EMSA1_HUMAN	53.01	4	0	1	3	3		93000	990000	480000	4	4	0	1	3	5	Oxidation (M)	114989	ELM2 and SANT domain-containing protein 1 OS=Homo sapiens OX=9606 GN=ELMSAN1 PE=1 SV=2
1077	3351	tr|A0A1C7CYX1|A0A1C7CYX1_HUMAN	53.01	3	0	1	2	3		93000	990000	480000	4	4	0	1	3	5	Oxidation (M)	120733	ELM2 and SANT domain-containing protein 1 OS=Homo sapiens OX=9606 GN=ELMSAN1 PE=1 SV=1
1586	4127	tr|A0A0C4DGI3|A0A0C4DGI3_HUMAN	52.91	7	4	3	0	0	203000	107000			2	2	1	1	0	0		44703	Citrate synthase OS=Homo sapiens OX=9606 GN=CS PE=1 SV=1
1586	4128	tr|B4DJV2|B4DJV2_HUMAN	52.91	6	4	2	0	0	203000	107000			2	2	1	1	0	0		50432	Citrate synthase OS=Homo sapiens OX=9606 GN=CS PE=1 SV=1
1586	4129	sp|O75390|CISY_HUMAN	52.91	6	3	2	0	0	203000	107000			2	2	1	1	0	0		51712	Citrate synthase mitochondrial OS=Homo sapiens OX=9606 GN=CS PE=1 SV=2
1278	4848	sp|P05387|RLA2_HUMAN	52.89	14	14	14	0	0	387000	130000			1	1	3	1	0	0		11665	60S acidic ribosomal protein P2 OS=Homo sapiens OX=9606 GN=RPLP2 PE=1 SV=1
1545	4751	sp|Q96PZ2|F111A_HUMAN	52.86	3	0	0	0	3				1060000	3	3	0	0	0	3		70196	Protein FAM111A OS=Homo sapiens OX=9606 GN=FAM111A PE=1 SV=2
1297	4648	sp|Q8WYA6|CTBL1_HUMAN	52.85	3	0	0	3	3			606000	634000	2	2	0	0	2	2	Oxidation (M)	65173	Beta-catenin-like protein 1 OS=Homo sapiens OX=9606 GN=CTNNBL1 PE=1 SV=1
1297	4649	tr|A0A087WUB9|A0A087WUB9_HUMAN	52.85	3	0	0	3	3			606000	634000	2	2	0	0	2	2	Oxidation (M)	65703	Beta-catenin-like protein 1 OS=Homo sapiens OX=9606 GN=CTNNBL1 PE=1 SV=1
1514	3625	sp|Q13451|FKBP5_HUMAN	52.81	6	0	4	4	0		57700	755000		3	3	0	3	2	0		51212	Peptidyl-prolyl cis-trans isomerase FKBP5 OS=Homo sapiens OX=9606 GN=FKBP5 PE=1 SV=2
1290	3413	sp|Q13111|CAF1A_HUMAN	52.75	4	0	0	4	2			666000	167000	3	3	0	0	3	2		106910	Chromatin assembly factor 1 subunit A OS=Homo sapiens OX=9606 GN=CHAF1A PE=1 SV=3
1431	4329	tr|A0A0R4J2F6|A0A0R4J2F6_HUMAN	52.68	5	0	0	5	5			722000	429000	2	2	0	0	2	3		48048	Interferon-related developmental regulator 2 OS=Homo sapiens OX=9606 GN=IFRD2 PE=1 SV=1
1431	4330	sp|Q12894|IFRD2_HUMAN	52.68	4	0	0	4	4			722000	429000	2	2	0	0	2	3		54814	Interferon-related developmental regulator 2 OS=Homo sapiens OX=9606 GN=IFRD2 PE=1 SV=3
1536	3551	sp|O15417|TNC18_HUMAN	52.66	1	0	0	1	0			1040000		3	3	0	0	3	0		314520	Trinucleotide repeat-containing gene 18 protein OS=Homo sapiens OX=9606 GN=TNRC18 PE=1 SV=3
1536	3552	tr|H9KVB4|H9KVB4_HUMAN	52.66	1	0	0	1	0			1040000		3	3	0	0	3	0		314462	Trinucleotide repeat-containing gene 18 protein OS=Homo sapiens OX=9606 GN=TNRC18 PE=1 SV=1
1380	3115	sp|Q2M389|WASC4_HUMAN	52.62	3	0	0	3	1			507000	134000	4	4	0	0	4	1		136403	WASH complex subunit 4 OS=Homo sapiens OX=9606 GN=WASHC4 PE=1 SV=2
1380	3116	tr|A0A087X256|A0A087X256_HUMAN	52.62	3	0	0	3	1			507000	134000	4	4	0	0	4	1		136502	WASH complex subunit 4 OS=Homo sapiens OX=9606 GN=WASHC4 PE=1 SV=1
1149	3271	sp|P19447|ERCC3_HUMAN	52.48	4	0	0	3	2			883000	540000	3	3	0	0	3	3		89278	General transcription and DNA repair factor IIH helicase subunit XPB OS=Homo sapiens OX=9606 GN=ERCC3 PE=1 SV=1
1149	3272	tr|A0A2R8Y6W8|A0A2R8Y6W8_HUMAN	52.48	4	0	0	3	2			883000	540000	3	3	0	0	3	3		91958	General transcription and DNA repair factor IIH helicase subunit XPB OS=Homo sapiens OX=9606 GN=ERCC3 PE=1 SV=1
1399	3842	sp|Q96A33|CCD47_HUMAN	52.42	4	0	0	4	2			1420000	296000	2	2	0	0	2	1		55874	Coiled-coil domain-containing protein 47 OS=Homo sapiens OX=9606 GN=CCDC47 PE=1 SV=1
1463	4585	sp|Q9NXN4|GDAP2_HUMAN	52.34	4	0	0	4	2			407000	137000	2	2	0	0	2	1		56225	Ganglioside-induced differentiation-associated protein 2 OS=Homo sapiens OX=9606 GN=GDAP2 PE=1 SV=1
865	4245	sp|B9A064|IGLL5_HUMAN	52.29	8	4	4	8	8	3820000	3170000	6180000	46300000	2	1	2	3	2	4	Carbamidomethylation	23063	Immunoglobulin lambda-like polypeptide 5 OS=Homo sapiens OX=9606 GN=IGLL5 PE=2 SV=2
865	4246	tr|A0A0B4J231|A0A0B4J231_HUMAN	52.29	8	4	4	8	8	3820000	3170000	6180000	46300000	2	1	2	3	2	4	Carbamidomethylation	23150	Immunoglobulin lambda-like polypeptide 5 OS=Homo sapiens OX=9606 GN=IGLL5 PE=1 SV=1
1085	3498	sp|P08575|PTPRC_HUMAN	52.16	4	0	0	3	4			925000	593000	4	4	0	0	5	5		147486	Receptor-type tyrosine-protein phosphatase C OS=Homo sapiens OX=9606 GN=PTPRC PE=1 SV=3
641	3555	sp|P52737|ZN136_HUMAN	52.13	5	0	0	5	4			248000	138000	3	1	0	0	8	20	Carbamidomethylation	62784	Zinc finger protein 136 OS=Homo sapiens OX=9606 GN=ZNF136 PE=1 SV=1
1317	3870	sp|O60841|IF2P_HUMAN	52.07	3	1	0	1	2	2560000		246000	244000	3	3	1	0	1	2	Deamidation (NQ)	138827	Eukaryotic translation initiation factor 5B OS=Homo sapiens OX=9606 GN=EIF5B PE=1 SV=4
1317	3871	tr|A0A087WUT6|A0A087WUT6_HUMAN	52.07	3	1	0	1	2	2560000		246000	244000	3	3	1	0	1	2	Deamidation (NQ)	138681	Eukaryotic translation initiation factor 5B OS=Homo sapiens OX=9606 GN=EIF5B PE=1 SV=1
1194	3478	sp|P09012|SNRPA_HUMAN	52.05	16	0	5	10	6		91300	571000	408000	4	4	0	2	2	2	Acetylation (Protein N-term)	31280	U1 small nuclear ribonucleoprotein A OS=Homo sapiens OX=9606 GN=SNRPA PE=1 SV=3
1194	3507	tr|M0R0G9|M0R0G9_HUMAN	52.05	43	0	9	31	21		91300	571000	408000	3	3	0	1	2	2	Acetylation (Protein N-term)	10083	U1 small nuclear ribonucleoprotein A OS=Homo sapiens OX=9606 GN=SNRPA PE=1 SV=1
1194	3508	tr|M0QXK2|M0QXK2_HUMAN	52.05	29	0	6	21	14		91300	571000	408000	3	3	0	1	2	2	Acetylation (Protein N-term)	14547	U1 small nuclear ribonucleoprotein A (Fragment) OS=Homo sapiens OX=9606 GN=SNRPA PE=1 SV=8
1194	3509	tr|M0R221|M0R221_HUMAN	52.05	26	0	6	19	13		91300	571000	408000	3	3	0	1	2	2	Acetylation (Protein N-term)	15946	U1 small nuclear ribonucleoprotein A (Fragment) OS=Homo sapiens OX=9606 GN=SNRPA PE=1 SV=1
1194	3510	tr|M0R2B8|M0R2B8_HUMAN	52.05	25	0	5	18	12		91300	571000	408000	3	3	0	1	2	2	Acetylation (Protein N-term)	16560	U1 small nuclear ribonucleoprotein A (Fragment) OS=Homo sapiens OX=9606 GN=SNRPA PE=1 SV=1
1298	4699	sp|P35321|SPR1A_HUMAN	51.93	18	9	18	0	0	297000	344000			2	2	1	4	0	0	Carbamidomethylation	9877	Cornifin-A OS=Homo sapiens OX=9606 GN=SPRR1A PE=1 SV=2
1298	4700	sp|P22528|SPR1B_HUMAN	51.93	18	9	18	0	0	297000	344000			2	2	1	4	0	0	Carbamidomethylation	9888	Cornifin-B OS=Homo sapiens OX=9606 GN=SPRR1B PE=1 SV=2
1084	3298	sp|P27797|CALR_HUMAN	51.83	6	2	6	2	2	11100	271000	794000	1590000	3	3	1	5	1	1		48142	Calreticulin OS=Homo sapiens OX=9606 GN=CALR PE=1 SV=1
1362	3940	tr|A0A024RAC6|A0A024RAC6_HUMAN	51.83	3	0	0	3	1			517000	189000	2	2	0	0	2	1	Acetylation (Protein N-term)	87230	Elongin-A OS=Homo sapiens OX=9606 GN=ELOA PE=1 SV=1
1343	3313	sp|Q96HW7|INT4_HUMAN	51.8	5	0	0	3	3			131000	218000	4	4	0	0	3	2		108171	Integrator complex subunit 4 OS=Homo sapiens OX=9606 GN=INTS4 PE=1 SV=2
1605	4212	tr|G8JLH9|G8JLH9_HUMAN	51.73	3	0	0	1	2			233000	254000	2	2	0	0	1	1		76138	Signal transducer and activator of transcription OS=Homo sapiens OX=9606 GN=STAT3 PE=1 SV=1
1605	4214	sp|P40763|STAT3_HUMAN	51.73	3	0	0	1	2			233000	254000	2	2	0	0	1	1		88068	Signal transducer and activator of transcription 3 OS=Homo sapiens OX=9606 GN=STAT3 PE=1 SV=2
1254	3095	sp|P28340|DPOD1_HUMAN	51.72	5	0	0	5	2			793000	337000	6	5	0	0	6	3		123631	DNA polymerase delta catalytic subunit OS=Homo sapiens OX=9606 GN=POLD1 PE=1 SV=2
1254	3096	tr|M0R2B7|M0R2B7_HUMAN	51.72	5	0	0	5	2			793000	337000	6	5	0	0	6	3		126388	DNA polymerase OS=Homo sapiens OX=9606 GN=POLD1 PE=1 SV=1
1321	4654	sp|Q9UGM3|DMBT1_HUMAN	51.66	1	0	1	1	1	3450000	65200	7310000	5400000	2	2	1	1	3	2	Oxidation (M)	260734	Deleted in malignant brain tumors 1 protein OS=Homo sapiens OX=9606 GN=DMBT1 PE=1 SV=2
1499	4666	tr|A0A2R8YE78|A0A2R8YE78_HUMAN	51.59	1	0	0	1	1			308000	347000	1	1	0	0	1	1		112063	Dynamin-like 120 kDa protein mitochondrial OS=Homo sapiens OX=9606 GN=OPA1 PE=1 SV=1
1499	4686	tr|A0A2R8Y3X5|A0A2R8Y3X5_HUMAN	51.59	1	0	0	1	1			308000	347000	1	1	0	0	1	1		99133	Dynamin-like 120 kDa protein mitochondrial OS=Homo sapiens OX=9606 GN=OPA1 PE=1 SV=1
1499	4687	sp|O60313|OPA1_HUMAN	51.59	1	0	0	1	1			308000	347000	1	1	0	0	1	1		111630	Dynamin-like 120 kDa protein mitochondrial OS=Homo sapiens OX=9606 GN=OPA1 PE=1 SV=3
1499	4688	tr|C9JMB8|C9JMB8_HUMAN	51.59	1	0	0	1	1			308000	347000	1	1	0	0	1	1		112628	Dynamin-like 120 kDa protein mitochondrial OS=Homo sapiens OX=9606 GN=OPA1 PE=1 SV=2
1499	4689	tr|E5KLJ9|E5KLJ9_HUMAN	51.59	1	0	0	1	1			308000	347000	1	1	0	0	1	1		113681	Dynamin-like 120 kDa protein mitochondrial OS=Homo sapiens OX=9606 GN=OPA1 PE=1 SV=1
1499	4690	tr|A0A2R8YDM2|A0A2R8YDM2_HUMAN	51.59	1	0	0	1	1			308000	347000	1	1	0	0	1	1		112273	Dynamin-like 120 kDa protein mitochondrial OS=Homo sapiens OX=9606 GN=OPA1 PE=1 SV=1
1499	4698	tr|A0A2R8YFD1|A0A2R8YFD1_HUMAN	51.59	2	0	0	2	2			308000	347000	1	1	0	0	1	1		72526	Dynamin-like 120 kDa protein mitochondrial (Fragment) OS=Homo sapiens OX=9606 GN=OPA1 PE=1 SV=1
1499	4702	tr|A0A2R8YGE5|A0A2R8YGE5_HUMAN	51.59	2	0	0	2	2			308000	347000	1	1	0	0	1	1		76138	Dynamin-like 120 kDa protein mitochondrial (Fragment) OS=Homo sapiens OX=9606 GN=OPA1 PE=1 SV=1
1499	4826	tr|A0A2R8YD53|A0A2R8YD53_HUMAN	51.59	2	0	0	2	2			308000	347000	1	1	0	0	1	1		64900	Dynamin-like 120 kDa protein mitochondrial OS=Homo sapiens OX=9606 GN=OPA1 PE=1 SV=1
1499	4836	tr|A0A2R8Y4Q3|A0A2R8Y4Q3_HUMAN	51.59	3	0	0	3	3			308000	347000	1	1	0	0	1	1		46647	Dynamin-like 120 kDa protein mitochondrial OS=Homo sapiens OX=9606 GN=OPA1 PE=1 SV=1
1203	3361	sp|O00267|SPT5H_HUMAN	51.54	3	0	0	3	0			603000		3	3	0	0	5	0		121000	Transcription elongation factor SPT5 OS=Homo sapiens OX=9606 GN=SUPT5H PE=1 SV=1
1310	4452	sp|Q6PIF6|MYO7B_HUMAN	51.29	1	0	0	1	1				33200	3	1	0	0	2	2	Deamidation (NQ)	241597	Unconventional myosin-VIIb OS=Homo sapiens OX=9606 GN=MYO7B PE=1 SV=2
2030	5089	tr|A0A087WXQ5|A0A087WXQ5_HUMAN	51.2	6	6	0	0	0	39800				1	1	1	0	0	0		22956	TAR DNA-binding protein 43 (Fragment) OS=Homo sapiens OX=9606 GN=TARDBP PE=1 SV=1
2030	5090	tr|A0A087WV68|A0A087WV68_HUMAN	51.2	6	6	0	0	0	39800				1	1	1	0	0	0		24096	TAR DNA-binding protein 43 (Fragment) OS=Homo sapiens OX=9606 GN=TARDBP PE=1 SV=1
2030	5091	tr|B1AKP7|B1AKP7_HUMAN	51.2	4	4	0	0	0	39800				1	1	1	0	0	0		33462	TAR DNA-binding protein 43 OS=Homo sapiens OX=9606 GN=TARDBP PE=1 SV=1
2030	5092	tr|G3V162|G3V162_HUMAN	51.2	4	4	0	0	0	39800				1	1	1	0	0	0		33730	TAR DNA binding protein isoform CRA_d OS=Homo sapiens OX=9606 GN=TARDBP PE=1 SV=1
2030	5093	tr|A0A087X260|A0A087X260_HUMAN	51.2	4	4	0	0	0	39800				1	1	1	0	0	0		34226	TAR DNA-binding protein 43 OS=Homo sapiens OX=9606 GN=TARDBP PE=1 SV=1
2030	5094	tr|A0A087WYY0|A0A087WYY0_HUMAN	51.2	4	4	0	0	0	39800				1	1	1	0	0	0		34291	TAR DNA-binding protein 43 OS=Homo sapiens OX=9606 GN=TARDBP PE=1 SV=1
2030	5095	sp|Q13148|TADBP_HUMAN	51.2	3	3	0	0	0	39800				1	1	1	0	0	0		44740	TAR DNA-binding protein 43 OS=Homo sapiens OX=9606 GN=TARDBP PE=1 SV=1
2030	5659	tr|A0A087WX29|A0A087WX29_HUMAN	51.2	5	5	0	0	0	39800				1	1	1	0	0	0		26743	TAR DNA-binding protein 43 (Fragment) OS=Homo sapiens OX=9606 GN=TARDBP PE=1 SV=1
2030	5724	tr|K7EJM5|K7EJM5_HUMAN	51.2	6	6	0	0	0	39800				1	1	1	0	0	0		22844	TAR DNA-binding protein 43 (Fragment) OS=Homo sapiens OX=9606 GN=TARDBP PE=1 SV=1
2030	5725	tr|A0A0A0N0M3|A0A0A0N0M3_HUMAN	51.2	4	4	0	0	0	39800				1	1	1	0	0	0		30727	TAR DNA-binding protein 43 OS=Homo sapiens OX=9606 GN=TARDBP PE=1 SV=1
2030	5726	tr|K7EN94|K7EN94_HUMAN	51.2	4	4	0	0	0	39800				1	1	1	0	0	0		31377	TAR DNA-binding protein 43 (Fragment) OS=Homo sapiens OX=9606 GN=TARDBP PE=1 SV=7
668	4019	sp|Q8TBZ8|ZN564_HUMAN	51.07	4	0	0	4	2			176000		2	1	0	0	6	19	Carbamidomethylation	63735	Zinc finger protein 564 OS=Homo sapiens OX=9606 GN=ZNF564 PE=1 SV=1
1500	4993	sp|Q9H8H0|NOL11_HUMAN	50.98	2	0	0	2	2			129000	84600	1	1	0	0	1	1		81124	Nucleolar protein 11 OS=Homo sapiens OX=9606 GN=NOL11 PE=1 SV=1
1500	6220	tr|J3QLQ6|J3QLQ6_HUMAN	50.98	7	0	0	7	7			129000	84600	1	1	0	0	1	1		21313	Nucleolar protein 11 (Fragment) OS=Homo sapiens OX=9606 GN=NOL11 PE=1 SV=1
1200	4370	sp|P62753|RS6_HUMAN	50.29	8	8	3	5	5	605000	24800	157000	341000	2	2	3	1	1	2		28681	40S ribosomal protein S6 OS=Homo sapiens OX=9606 GN=RPS6 PE=1 SV=1
2044	5667	sp|Q71UM5|RS27L_HUMAN	50.26	15	15	0	0	0	0				1	1	1	0	0	0		9477	40S ribosomal protein S27-like OS=Homo sapiens OX=9606 GN=RPS27L PE=1 SV=3
2044	5668	sp|P42677|RS27_HUMAN	50.26	15	15	0	0	0	0				1	1	1	0	0	0		9461	40S ribosomal protein S27 OS=Homo sapiens OX=9606 GN=RPS27 PE=1 SV=3
2044	5669	tr|H0YMV8|H0YMV8_HUMAN	50.26	13	13	0	0	0	0				1	1	1	0	0	0		11346	40S ribosomal protein S27 OS=Homo sapiens OX=9606 GN=RPS27L PE=1 SV=1
2044	6297	tr|C9JLI6|C9JLI6_HUMAN	50.26	13	13	0	0	0	0				1	1	1	0	0	0		10886	40S ribosomal protein S27 OS=Homo sapiens OX=9606 GN=RPS27L PE=1 SV=1
1289	3380	tr|B7ZM65|B7ZM65_HUMAN	50.17	2	0	0	2	2			844000	281000	3	3	0	0	3	2		178188	PHD and RING finger domain-containing protein 1 OS=Homo sapiens OX=9606 GN=PHRF1 PE=1 SV=1
1289	3381	tr|E9PJ24|E9PJ24_HUMAN	50.17	2	0	0	2	2			844000	281000	3	3	0	0	3	2		178216	PHD and RING finger domain-containing protein 1 OS=Homo sapiens OX=9606 GN=PHRF1 PE=1 SV=1
1289	3382	tr|A0A0J9YYB5|A0A0J9YYB5_HUMAN	50.17	2	0	0	2	2			844000	281000	3	3	0	0	3	2		178421	PHD and RING finger domain-containing protein 1 OS=Homo sapiens OX=9606 GN=PHRF1 PE=1 SV=1
1289	3383	tr|F8WEF5|F8WEF5_HUMAN	50.17	2	0	0	2	2			844000	281000	3	3	0	0	3	2		178449	PHD and RING finger domain-containing protein 1 OS=Homo sapiens OX=9606 GN=PHRF1 PE=1 SV=1
1289	3384	tr|A0A0J9YWD5|A0A0J9YWD5_HUMAN	50.17	2	0	0	2	2			844000	281000	3	3	0	0	3	2		178550	PHD and RING finger domain-containing protein 1 OS=Homo sapiens OX=9606 GN=PHRF1 PE=1 SV=1
1289	3385	sp|Q9P1Y6|PHRF1_HUMAN	50.17	2	0	0	2	2			844000	281000	3	3	0	0	3	2		178665	PHD and RING finger domain-containing protein 1 OS=Homo sapiens OX=9606 GN=PHRF1 PE=1 SV=3
1289	3419	tr|A0A0J9YX88|A0A0J9YX88_HUMAN	50.17	3	0	0	3	2			844000	281000	3	3	0	0	3	2		161911	PHD and RING finger domain-containing protein 1 OS=Homo sapiens OX=9606 GN=PHRF1 PE=1 SV=1
1051	4703	sp|P61353|RL27_HUMAN	50	12	12	12	7	0	611000	49100	295000		2	2	4	2	1	0		15798	60S ribosomal protein L27 OS=Homo sapiens OX=9606 GN=RPL27 PE=1 SV=2
1361	3689	sp|Q9UJV9|DDX41_HUMAN	49.97	7	0	0	3	6			154000	879000	4	4	0	0	3	3		69838	Probable ATP-dependent RNA helicase DDX41 OS=Homo sapiens OX=9606 GN=DDX41 PE=1 SV=2
1361	3690	tr|J3KNN5|J3KNN5_HUMAN	49.97	7	0	0	3	5			154000	879000	4	4	0	0	3	3		71649	Probable ATP-dependent RNA helicase DDX41 (Fragment) OS=Homo sapiens OX=9606 GN=DDX41 PE=1 SV=1
1429	3937	tr|H7C155|H7C155_HUMAN	49.96	4	0	0	2	4			93200	120000	2	1	0	0	1	2		59741	RAF proto-oncogene serine/threonine-protein kinase (Fragment) OS=Homo sapiens OX=9606 GN=RAF1 PE=1 SV=1
1429	3939	sp|P04049|RAF1_HUMAN	49.96	4	0	0	2	4			93200	120000	2	1	0	0	1	2		73052	RAF proto-oncogene serine/threonine-protein kinase OS=Homo sapiens OX=9606 GN=RAF1 PE=1 SV=1
1350	3337	sp|Q14149|MORC3_HUMAN	49.75	4	0	0	4	0			1230000		4	4	0	0	6	0		107113	MORC family CW-type zinc finger protein 3 OS=Homo sapiens OX=9606 GN=MORC3 PE=1 SV=3
1550	5084	sp|Q6F5E8|CARL2_HUMAN	49.64	1	0	0	1	1			177000	323000	1	1	0	0	1	1		154688	Capping protein Arp2/3 and myosin-I linker protein 2 OS=Homo sapiens OX=9606 GN=CARMIL2 PE=1 SV=2
1585	4024	tr|A0A0D9SG77|A0A0D9SG77_HUMAN	49.51	3	0	0	3	0			340000		2	2	0	0	3	0		88083	Ubiquitin-protein ligase E3A OS=Homo sapiens OX=9606 GN=UBE3A PE=1 SV=1
1585	4026	tr|A0A1B0GVL3|A0A1B0GVL3_HUMAN	49.51	2	0	0	2	0			340000		2	2	0	0	3	0		93544	Ubiquitin-protein ligase E3A OS=Homo sapiens OX=9606 GN=UBE3A PE=1 SV=1
1585	4028	sp|Q05086|UBE3A_HUMAN	49.51	2	0	0	2	0			340000		2	2	0	0	3	0		100688	Ubiquitin-protein ligase E3A OS=Homo sapiens OX=9606 GN=UBE3A PE=1 SV=4
1769	3535	sp|Q15031|SYLM_HUMAN	49.45	4	0	0	0	4				238000	4	4	0	0	0	4		101976	Probable leucine--tRNA ligase mitochondrial OS=Homo sapiens OX=9606 GN=LARS2 PE=1 SV=2
1769	3662	tr|E9PHM2|E9PHM2_HUMAN	49.45	3	0	0	0	3				238000	3	3	0	0	0	3		96931	Probable leucine--tRNA ligase mitochondrial OS=Homo sapiens OX=9606 GN=LARS2 PE=1 SV=1
1247	3352	sp|Q08209|PP2BA_HUMAN	49.25	6	0	0	4	6			1580000	2320000	3	3	0	0	2	3		58688	Serine/threonine-protein phosphatase 2B catalytic subunit alpha isoform OS=Homo sapiens OX=9606 GN=PPP3CA PE=1 SV=1
1247	3391	tr|E9PPC8|E9PPC8_HUMAN	49.25	23	0	0	17	23			1580000	2320000	3	3	0	0	2	3		15365	Serine/threonine-protein phosphatase (Fragment) OS=Homo sapiens OX=9606 GN=PPP3CA PE=1 SV=1
1247	3392	tr|E9PK68|E9PK68_HUMAN	49.25	20	0	0	15	20			1580000	2320000	3	3	0	0	2	3		17027	Serine/threonine-protein phosphatase (Fragment) OS=Homo sapiens OX=9606 GN=PPP3CA PE=1 SV=1
1406	4182	sp|P11047|LAMC1_HUMAN	49.24	1	0	1	0	0		74400			2	2	0	3	0	0		177602	Laminin subunit gamma-1 OS=Homo sapiens OX=9606 GN=LAMC1 PE=1 SV=3
1212	6243	sp|P62861|RS30_HUMAN	49.18	17	17	17	17	17	122000	31200	148000	161000	1	1	2	1	1	1		6648	40S ribosomal protein S30 OS=Homo sapiens OX=9606 GN=FAU PE=1 SV=1
1212	6245	tr|E9PR30|E9PR30_HUMAN	49.18	10	10	10	10	10	122000	31200	148000	161000	1	1	2	1	1	1		10905	40S ribosomal protein S30 OS=Homo sapiens OX=9606 GN=FAU PE=1 SV=1
1412	3435	tr|A0A0B4J1W3|A0A0B4J1W3_HUMAN	49.14	4	0	0	2	2			224000	149000	3	2	0	0	2	2	Carbamidomethylation; Oxidation (M)	101201	N-alpha-acetyltransferase 15 NatA auxiliary subunit OS=Homo sapiens OX=9606 GN=NAA15 PE=1 SV=1
1412	3436	sp|Q9BXJ9|NAA15_HUMAN	49.14	4	0	0	2	2			224000	149000	3	2	0	0	2	2	Carbamidomethylation; Oxidation (M)	101272	N-alpha-acetyltransferase 15 NatA auxiliary subunit OS=Homo sapiens OX=9606 GN=NAA15 PE=1 SV=1
1595	5104	sp|O95373|IPO7_HUMAN	49.14	1	0	0	1	0			207000		1	1	0	0	2	0		119516	Importin-7 OS=Homo sapiens OX=9606 GN=IPO7 PE=1 SV=1
1306	3499	sp|Q9NU22|MDN1_HUMAN	49.12	1	0	0	1	1			448000	162000	5	5	0	0	4	4		632827	Midasin OS=Homo sapiens OX=9606 GN=MDN1 PE=1 SV=2
1559	3649	sp|P21397|AOFA_HUMAN	49.07	8	0	0	4	5			233000	1220000	3	3	0	0	1	2		59682	Amine oxidase [flavin-containing] A OS=Homo sapiens OX=9606 GN=MAOA PE=1 SV=1
1452	4855	sp|O60942|MCE1_HUMAN	49.03	4	0	0	4	4			195000	474000	2	2	0	0	2	2		68557	mRNA-capping enzyme OS=Homo sapiens OX=9606 GN=RNGTT PE=1 SV=1
1582	3698	sp|Q9H4E7|DEFI6_HUMAN	49.02	4	0	0	4	0			312000		2	2	0	0	2	0		73910	Differentially expressed in FDCP 6 homolog OS=Homo sapiens OX=9606 GN=DEF6 PE=1 SV=1
1295	3857	tr|A0A0C4DG41|A0A0C4DG41_HUMAN	49.01	12	0	0	12	5			1940000	0	3	3	0	0	4	1		43974	Transcriptional regulator ERG OS=Homo sapiens OX=9606 GN=ERG PE=1 SV=1
1295	3858	sp|P11308|ERG_HUMAN	49.01	10	0	0	10	4			1940000	0	3	3	0	0	4	1		54608	Transcriptional regulator ERG OS=Homo sapiens OX=9606 GN=ERG PE=1 SV=2
2029	4977	tr|A0A0C4DH09|A0A0C4DH09_HUMAN	49.01	3	0	0	3	0			62000		1	1	0	0	1	0		80548	Protein transport protein Sec16A (Fragment) OS=Homo sapiens OX=9606 GN=SEC16A PE=1 SV=1
2029	4978	tr|A0A3F2YNZ0|A0A3F2YNZ0_HUMAN	49.01	1	0	0	1	0			62000		1	1	0	0	1	0		231133	Protein transport protein sec16 OS=Homo sapiens OX=9606 GN=SEC16A PE=1 SV=1
1258	3450	tr|H7C5E4|H7C5E4_HUMAN	48.91	2	0	0	2	2			245000	144000	3	3	0	0	3	3		130197	5'-3' exoribonuclease 1 (Fragment) OS=Homo sapiens OX=9606 GN=XRN1 PE=1 SV=1
1258	3451	sp|Q8IZH2|XRN1_HUMAN	48.91	2	0	0	2	2			245000	144000	3	3	0	0	3	3		194106	5'-3' exoribonuclease 1 OS=Homo sapiens OX=9606 GN=XRN1 PE=1 SV=1
1987	5225	tr|B4DIW9|B4DIW9_HUMAN	48.89	1	0	0	1	0			115000		1	1	0	0	1	0		77746	Serine/threonine-protein phosphatase 6 regulatory ankyrin repeat subunit A OS=Homo sapiens OX=9606 GN=ANKRD28 PE=1 SV=1
1987	5228	sp|O15084|ANR28_HUMAN	48.89	1	0	0	1	0			115000		1	1	0	0	1	0		112966	Serine/threonine-protein phosphatase 6 regulatory ankyrin repeat subunit A OS=Homo sapiens OX=9606 GN=ANKRD28 PE=1 SV=5
1264	3389	sp|Q9UGP8|SEC63_HUMAN	48.78	5	0	0	5	2			412000	122000	3	3	0	0	3	1		87997	Translocation protein SEC63 homolog OS=Homo sapiens OX=9606 GN=SEC63 PE=1 SV=2
2042	5455	tr|M0R0P7|M0R0P7_HUMAN	48.77	9	9	0	0	0	0				1	1	1	0	0	0	Carbamidomethylation	16177	60S ribosomal protein L18a OS=Homo sapiens OX=9606 GN=RPL18A PE=1 SV=1
2042	5868	tr|M0R3D6|M0R3D6_HUMAN	48.77	9	9	0	0	0	0				1	1	1	0	0	0	Carbamidomethylation	16715	60S ribosomal protein L18a (Fragment) OS=Homo sapiens OX=9606 GN=RPL18A PE=1 SV=1
2042	5869	tr|M0R1A7|M0R1A7_HUMAN	48.77	9	9	0	0	0	0				1	1	1	0	0	0	Carbamidomethylation	17477	60S ribosomal protein L18a OS=Homo sapiens OX=9606 GN=RPL18A PE=1 SV=1
[truncated: 1,026 more rows]

## Sheet: COIP proteins
Accession	Protein Name	-10lgP	Area CTL_IgG	Area osimertinib_IgG	Area CTL_CD34	Area osimertinib_CD34	PTM	Avg. Mass	Description
P35637	FUS_HUMAN	396.65			38500000	93100000	Carbamidomethylation; Acetylation (Protein N-term); Oxidation (M); Deamidation (NQ)	53426	RNA-binding protein FUS OS=Homo sapiens OX=9606 GN=FUS PE=1 SV=1
H3BPE7	H3BPE7_HUMAN	392.58			311000	612000	Carbamidomethylation; Acetylation (Protein N-term); Oxidation (M); Deamidation (NQ)	53497	RNA-binding protein FUS OS=Homo sapiens OX=9606 GN=FUS PE=1 SV=1
A0A3B3ITJ4	A0A3B3ITJ4_HUMAN	384.76			3870000	4820000	Carbamidomethylation; Oxidation (M); Deamidation (NQ)	59219	Heterogeneous nuclear ribonucleoprotein L (Fragment) OS=Homo sapiens OX=9606 GN=HNRNPL PE=1 SV=1
P28906	CD34_HUMAN	376.87			6000000000	5910000000	Carbamidomethylation; Oxidation (M); Deamidation (NQ)	40716	Hematopoietic progenitor cell antigen CD34 OS=Homo sapiens OX=9606 GN=CD34 PE=1 SV=2
Q92614	MY18A_HUMAN	372.75			782000000	282000000	Carbamidomethylation; Oxidation (M); Deamidation (NQ)	233113	Unconventional myosin-XVIIIa OS=Homo sapiens OX=9606 GN=MYO18A PE=1 SV=3
A0A0D9SFK2	A0A0D9SFK2_HUMAN	372.75			782000000	282000000	Carbamidomethylation; Oxidation (M); Deamidation (NQ)	231105	Unconventional myosin-XVIIIa OS=Homo sapiens OX=9606 GN=MYO18A PE=1 SV=1
Q15424	SAFB1_HUMAN	351.95			407000000	141000000	Carbamidomethylation; Acetylation (Protein N-term); Oxidation (M); Deamidation (NQ)	102642	Scaffold attachment factor B1 OS=Homo sapiens OX=9606 GN=SAFB PE=1 SV=4
P78527	PRKDC_HUMAN	350.81			601000000	369000000	Carbamidomethylation; Oxidation (M); Deamidation (NQ)	469093	DNA-dependent protein kinase catalytic subunit OS=Homo sapiens OX=9606 GN=PRKDC PE=1 SV=3
P11387	TOP1_HUMAN	330.18			798000000	648000000	Carbamidomethylation; Acetylation (Protein N-term); Oxidation (M); Deamidation (NQ)	90726	DNA topoisomerase 1 OS=Homo sapiens OX=9606 GN=TOP1 PE=1 SV=2
Q92609	TBCD5_HUMAN	323.8			252000000	198000000	Carbamidomethylation; Acetylation (Protein N-term); Oxidation (M); Deamidation (NQ)	89004	TBC1 domain family member 5 OS=Homo sapiens OX=9606 GN=TBC1D5 PE=1 SV=1
Q5T6W2	Q5T6W2_HUMAN	318.8			5050000	1760000	Carbamidomethylation; Acetylation (Protein N-term); Oxidation (M); Deamidation (NQ)	41807	Heterogeneous nuclear ribonucleoprotein K (Fragment) OS=Homo sapiens OX=9606 GN=HNRNPK PE=1 SV=1
E7EQT4	E7EQT4_HUMAN	317.1			53400000	24700000	Carbamidomethylation; Oxidation (M); Deamidation (NQ)	147362	Apoptotic chromatin condensation inducer in the nucleus OS=Homo sapiens OX=9606 GN=ACIN1 PE=1 SV=2
Q6WCQ1	MPRIP_HUMAN	305.08			8650000	651000	Carbamidomethylation; Oxidation (M); Deamidation (NQ)	116533	Myosin phosphatase Rho-interacting protein OS=Homo sapiens OX=9606 GN=MPRIP PE=1 SV=3
D3DTX6	D3DTX6_HUMAN	302.9			432000000	159000000	Carbamidomethylation; Oxidation (M); Deamidation (NQ)	89334	Neurabin-2 OS=Homo sapiens OX=9606 GN=PPP1R9B PE=1 SV=1
Q9Y5B9	SP16H_HUMAN	299.35			357000000	210000000	Carbamidomethylation; Acetylation (Protein N-term); Oxidation (M); Deamidation (NQ)	119914	FACT complex subunit SPT16 OS=Homo sapiens OX=9606 GN=SUPT16H PE=1 SV=1
Q1KMD3	HNRL2_HUMAN	299.18			175000000	169000000	Carbamidomethylation; Oxidation (M); Deamidation (NQ)	85105	Heterogeneous nuclear ribonucleoprotein U-like protein 2 OS=Homo sapiens OX=9606 GN=HNRNPUL2 PE=1 SV=1
Q9NWH9	SLTM_HUMAN	298.15			282000000	117000000	Carbamidomethylation; Acetylation (Protein N-term); Oxidation (M); Deamidation (NQ)	117149	SAFB-like transcription modulator OS=Homo sapiens OX=9606 GN=SLTM PE=1 SV=2
Q9NTI5	PDS5B_HUMAN	288.33			41100000	16600000	Carbamidomethylation; Oxidation (M); Deamidation (NQ)	164666	Sister chromatid cohesion protein PDS5 homolog B OS=Homo sapiens OX=9606 GN=PDS5B PE=1 SV=1
Q8WYP5	ELYS_HUMAN	286.97			81200000	96700000	Carbamidomethylation; Oxidation (M); Deamidation (NQ)	252496	Protein ELYS OS=Homo sapiens OX=9606 GN=AHCTF1 PE=1 SV=3
Q01831	XPC_HUMAN	286.9			76000000	73700000	Carbamidomethylation; Oxidation (M); Deamidation (NQ)	105953	DNA repair protein complementing XP-C cells OS=Homo sapiens OX=9606 GN=XPC PE=1 SV=4
A0A3B3ITZ9	A0A3B3ITZ9_HUMAN	286.07			176000000	52900000	Oxidation (M); Deamidation (NQ)	103523	Thyroid hormone receptor-associated protein 3 OS=Homo sapiens OX=9606 GN=THRAP3 PE=1 SV=1
Q9Y2W1	TR150_HUMAN	286.07			176000000	52900000	Oxidation (M); Deamidation (NQ)	108666	Thyroid hormone receptor-associated protein 3 OS=Homo sapiens OX=9606 GN=THRAP3 PE=1 SV=2
P02545	LMNA_HUMAN	285.46			1430000	2650000	Carbamidomethylation; Acetylation (Protein N-term); Oxidation (M); Deamidation (NQ)	74140	Prelamin-A/C OS=Homo sapiens OX=9606 GN=LMNA PE=1 SV=1
Q9NYF8	BCLF1_HUMAN	282.35			136000000	28100000	Carbamidomethylation; Oxidation (M)	106122	Bcl-2-associated transcription factor 1 OS=Homo sapiens OX=9606 GN=BCLAF1 PE=1 SV=2
H0Y2S9	H0Y2S9_HUMAN	275.94			2120000		Carbamidomethylation; Oxidation (M); Deamidation (NQ)	203491	Myosin phosphatase Rho-interacting protein (Fragment) OS=Homo sapiens OX=9606 GN=MPRIP PE=1 SV=3
O60506	HNRPQ_HUMAN	274.6			4130000	10300000	Carbamidomethylation; Oxidation (M); Deamidation (NQ)	69603	Heterogeneous nuclear ribonucleoprotein Q OS=Homo sapiens OX=9606 GN=SYNCRIP PE=1 SV=2
O60264	SMCA5_HUMAN	272.14			70700000	54800000	Carbamidomethylation; Acetylation (Protein N-term); Oxidation (M); Deamidation (NQ)	121905	SWI/SNF-related matrix-associated actin-dependent regulator of chromatin subfamily A member 5 OS=Homo sapiens OX=9606 GN=SMARCA5 PE=1 SV=1
K7ENG2	K7ENG2_HUMAN	272.05			1980000	437000	Carbamidomethylation; Oxidation (M); Deamidation (NQ)	33902	U2 snRNP auxiliary factor large subunit OS=Homo sapiens OX=9606 GN=U2AF2 PE=1 SV=1
Q8WWQ0	PHIP_HUMAN	270.37			80800000	40200000	Carbamidomethylation; Oxidation (M); Deamidation (NQ)	206688	PH-interacting protein OS=Homo sapiens OX=9606 GN=PHIP PE=1 SV=2
Q86WJ1	CHD1L_HUMAN	268.84			123000000	87100000	Carbamidomethylation; Oxidation (M)	101000	Chromodomain-helicase-DNA-binding protein 1-like OS=Homo sapiens OX=9606 GN=CHD1L PE=1 SV=3
Q92499	DDX1_HUMAN	268.26			117000000	143000000	Carbamidomethylation; Oxidation (M); Deamidation (NQ)	82432	ATP-dependent RNA helicase DDX1 OS=Homo sapiens OX=9606 GN=DDX1 PE=1 SV=2
P53621	COPA_HUMAN	267.19			44900000	16100000	Carbamidomethylation; Oxidation (M); Deamidation (NQ)	138345	Coatomer subunit alpha OS=Homo sapiens OX=9606 GN=COPA PE=1 SV=2
B7Z645	B7Z645_HUMAN	264.04			2930000	5810000	Carbamidomethylation; Oxidation (M); Deamidation (NQ)	52046	Synaptotagmin binding cytoplasmic RNA interacting protein isoform CRA_b OS=Homo sapiens OX=9606 GN=SYNCRIP PE=1 SV=1
P68366	TBA4A_HUMAN	262.72			2620000	1660000	Carbamidomethylation; Oxidation (M); Deamidation (NQ)	49924	Tubulin alpha-4A chain OS=Homo sapiens OX=9606 GN=TUBA4A PE=1 SV=1
P11388	TOP2A_HUMAN	261.75			16800000	8810000	Carbamidomethylation; Oxidation (M); Deamidation (NQ)	174384	DNA topoisomerase 2-alpha OS=Homo sapiens OX=9606 GN=TOP2A PE=1 SV=3
A0A087X0X3	A0A087X0X3_HUMAN	259.1			16000000	20100000	Carbamidomethylation; Acetylation (Protein N-term); Oxidation (M); Deamidation (NQ)	77570	Heterogeneous nuclear ribonucleoprotein M OS=Homo sapiens OX=9606 GN=HNRNPM PE=1 SV=1
P52272	HNRPM_HUMAN	259.1			16000000	20100000	Carbamidomethylation; Acetylation (Protein N-term); Oxidation (M); Deamidation (NQ)	77516	Heterogeneous nuclear ribonucleoprotein M OS=Homo sapiens OX=9606 GN=HNRNPM PE=1 SV=3
P51608	MECP2_HUMAN	257.22			27300000	36700000	Oxidation (M)	52441	Methyl-CpG-binding protein 2 OS=Homo sapiens OX=9606 GN=MECP2 PE=1 SV=1
Q14683	SMC1A_HUMAN	253.66			60600000	17200000	Carbamidomethylation; Oxidation (M); Deamidation (NQ)	143233	Structural maintenance of chromosomes protein 1A OS=Homo sapiens OX=9606 GN=SMC1A PE=1 SV=2
Q13576	IQGA2_HUMAN	252.81			40700000	13400000	Carbamidomethylation; Oxidation (M)	180577	Ras GTPase-activating-like protein IQGAP2 OS=Homo sapiens OX=9606 GN=IQGAP2 PE=1 SV=4
Q8IXT5	RB12B_HUMAN	251.41			84200000	99200000	Carbamidomethylation; Oxidation (M); Deamidation (NQ)	118103	RNA-binding protein 12B OS=Homo sapiens OX=9606 GN=RBM12B PE=1 SV=2
O14974	MYPT1_HUMAN	251.09			15200000	1480000	Carbamidomethylation; Oxidation (M); Deamidation (NQ)	115281	Protein phosphatase 1 regulatory subunit 12A OS=Homo sapiens OX=9606 GN=PPP1R12A PE=1 SV=1
Q8TAQ2	SMRC2_HUMAN	250.23			1010000	1200000	Carbamidomethylation; Oxidation (M); Deamidation (NQ)	132879	SWI/SNF complex subunit SMARCC2 OS=Homo sapiens OX=9606 GN=SMARCC2 PE=1 SV=1
O94832	MYO1D_HUMAN	248.89			83100000	14000000	Carbamidomethylation; Acetylation (Protein N-term); Oxidation (M); Deamidation (NQ)	116202	Unconventional myosin-Id OS=Homo sapiens OX=9606 GN=MYO1D PE=1 SV=2
G3V3B0	G3V3B0_HUMAN	247.28			1920000	258000	Carbamidomethylation; Deamidation (NQ)	67495	Apoptotic chromatin condensation inducer in the nucleus OS=Homo sapiens OX=9606 GN=ACIN1 PE=1 SV=1
Q08945	SSRP1_HUMAN	245.1			142000000	104000000	Carbamidomethylation; Acetylation (Protein N-term); Oxidation (M); Deamidation (NQ)	81075	FACT complex subunit SSRP1 OS=Homo sapiens OX=9606 GN=SSRP1 PE=1 SV=1
Q9H0A0	NAT10_HUMAN	244.02			43000000	23400000	Carbamidomethylation; Oxidation (M); Deamidation (NQ)	115730	RNA cytidine acetyltransferase OS=Homo sapiens OX=9606 GN=NAT10 PE=1 SV=2
O14497	ARI1A_HUMAN	242.04			14700000	19300000	Carbamidomethylation; Acetylation (Protein N-term); Oxidation (M)	242042	AT-rich interactive domain-containing protein 1A OS=Homo sapiens OX=9606 GN=ARID1A PE=1 SV=3
B1ANR0	B1ANR0_HUMAN	241.78			12100000	6710000	Carbamidomethylation; Oxidation (M); Deamidation (NQ)	67971	Polyadenylate-binding protein OS=Homo sapiens OX=9606 GN=PABPC4 PE=1 SV=1
Q13310	PABP4_HUMAN	241.78			12100000	6710000	Carbamidomethylation; Oxidation (M); Deamidation (NQ)	70783	Polyadenylate-binding protein 4 OS=Homo sapiens OX=9606 GN=PABPC4 PE=1 SV=1
Q16643	DREB_HUMAN	241.75			95000000	27900000	Carbamidomethylation; Acetylation (Protein N-term); Oxidation (M); Deamidation (NQ)	71429	Drebrin OS=Homo sapiens OX=9606 GN=DBN1 PE=1 SV=4
Q9UKV8	AGO2_HUMAN	240.96			26900000	28300000	Carbamidomethylation; Oxidation (M)	97208	Protein argonaute-2 OS=Homo sapiens OX=9606 GN=AGO2 PE=1 SV=3
Q15029	U5S1_HUMAN	239.28			57000000	30200000	Carbamidomethylation; Oxidation (M)	109436	116 kDa U5 small nuclear ribonucleoprotein component OS=Homo sapiens OX=9606 GN=EFTUD2 PE=1 SV=1
P46940	IQGA1_HUMAN	238.82			31900000	10900000	Oxidation (M); Deamidation (NQ)	189251	Ras GTPase-activating-like protein IQGAP1 OS=Homo sapiens OX=9606 GN=IQGAP1 PE=1 SV=1
Q9Y6K1	DNM3A_HUMAN	238.74			18700000	6060000	Carbamidomethylation; Oxidation (M)	101858	DNA (cytosine-5)-methyltransferase 3A OS=Homo sapiens OX=9606 GN=DNMT3A PE=1 SV=4
Q8WUM4	PDC6I_HUMAN	237.75			27900000	15800000	Carbamidomethylation; Acetylation (Protein N-term); Oxidation (M); Deamidation (NQ)	96023	Programmed cell death 6-interacting protein OS=Homo sapiens OX=9606 GN=PDCD6IP PE=1 SV=1
P12814	ACTN1_HUMAN	235.76			17000000	2530000	Carbamidomethylation; Oxidation (M); Deamidation (NQ)	103058	Alpha-actinin-1 OS=Homo sapiens OX=9606 GN=ACTN1 PE=1 SV=2
F8VXC8	F8VXC8_HUMAN	234.73			156000	84000	Carbamidomethylation; Oxidation (M); Deamidation (NQ)	136184	SWI/SNF complex subunit SMARCC2 OS=Homo sapiens OX=9606 GN=SMARCC2 PE=1 SV=1
A6NHR9	SMHD1_HUMAN	234.21			28500000	9860000	Carbamidomethylation; Oxidation (M); Deamidation (NQ)	226372	Structural maintenance of chromosomes flexible hinge domain-containing protein 1 OS=Homo sapiens OX=9606 GN=SMCHD1 PE=1 SV=2
Q9H6F5	CCD86_HUMAN	232.93			159000000	243000000	Acetylation (Protein N-term); Oxidation (M); Deamidation (NQ)	40236	Coiled-coil domain-containing protein 86 OS=Homo sapiens OX=9606 GN=CCDC86 PE=1 SV=1
F8VZN8	F8VZN8_HUMAN	231.6			631000	128000	Carbamidomethylation; Oxidation (M)	76533	Protein phosphatase 1 regulatory subunit 12A (Fragment) OS=Homo sapiens OX=9606 GN=PPP1R12A PE=1 SV=1
Q15393	SF3B3_HUMAN	230.29			32000000	17800000	Carbamidomethylation; Oxidation (M); Deamidation (NQ)	135577	Splicing factor 3B subunit 3 OS=Homo sapiens OX=9606 GN=SF3B3 PE=1 SV=4
Q86V48	LUZP1_HUMAN	229.76			29400000	3170000	Carbamidomethylation; Acetylation (Protein N-term); Deamidation (NQ)	120275	Leucine zipper protein 1 OS=Homo sapiens OX=9606 GN=LUZP1 PE=1 SV=2
Q96FS4	SIPA1_HUMAN	228.39			29900000	2240000	Carbamidomethylation; Oxidation (M); Deamidation (NQ)	112149	Signal-induced proliferation-associated protein 1 OS=Homo sapiens OX=9606 GN=SIPA1 PE=1 SV=1
P78347	GTF2I_HUMAN	227.53			23800000	16600000	Carbamidomethylation; Acetylation (Protein N-term); Oxidation (M); Deamidation (NQ)	112416	General transcription factor II-I OS=Homo sapiens OX=9606 GN=GTF2I PE=1 SV=2
Q9H0D6	XRN2_HUMAN	227.41			35100000	27400000	Carbamidomethylation; Oxidation (M); Deamidation (NQ)	108583	5'-3' exoribonuclease 2 OS=Homo sapiens OX=9606 GN=XRN2 PE=1 SV=1
O75533	SF3B1_HUMAN	222.23			30300000	10000000	Carbamidomethylation; Oxidation (M); Deamidation (NQ)	145830	Splicing factor 3B subunit 1 OS=Homo sapiens OX=9606 GN=SF3B1 PE=1 SV=3
F8VXG7	F8VXG7_HUMAN	221.68			46600000	7770000	Deamidation (NQ)	142602	Protein SCAF11 OS=Homo sapiens OX=9606 GN=SCAF11 PE=1 SV=1
Q99590	SCAFB_HUMAN	221.68			46600000	7770000	Deamidation (NQ)	164651	Protein SCAF11 OS=Homo sapiens OX=9606 GN=SCAF11 PE=1 SV=2
P49916	DNLI3_HUMAN	220.48			32000000	22000000	Carbamidomethylation; Oxidation (M); Deamidation (NQ)	112907	DNA ligase 3 OS=Homo sapiens OX=9606 GN=LIG3 PE=1 SV=2
P61221	ABCE1_HUMAN	218.24			31600000	31400000	Carbamidomethylation; Oxidation (M); Deamidation (NQ)	67314	ATP-binding cassette sub-family E member 1 OS=Homo sapiens OX=9606 GN=ABCE1 PE=1 SV=1
Q5JTV8	TOIP1_HUMAN	218.13			37400000	16500000	Carbamidomethylation; Deamidation (NQ)	66248	Torsin-1A-interacting protein 1 OS=Homo sapiens OX=9606 GN=TOR1AIP1 PE=1 SV=2
A0A0A0MSK5	A0A0A0MSK5_HUMAN	218.13			37400000	16500000	Carbamidomethylation; Deamidation (NQ)	52406	Torsin-1A-interacting protein 1 OS=Homo sapiens OX=9606 GN=TOR1AIP1 PE=1 SV=1
Q96GM5	SMRD1_HUMAN	217.71			51400000	39700000	Carbamidomethylation; Oxidation (M); Deamidation (NQ)	58233	SWI/SNF-related matrix-associated actin-dependent regulator of chromatin subfamily D member 1 OS=Homo sapiens OX=9606 GN=SMARCD1 PE=1 SV=2
Q29RF7	PDS5A_HUMAN	214.53			10000000	2380000	Carbamidomethylation; Deamidation (NQ)	150830	Sister chromatid cohesion protein PDS5 homolog A OS=Homo sapiens OX=9606 GN=PDS5A PE=1 SV=1
O95870	ABHGA_HUMAN	213.8			15900000	6380000	Carbamidomethylation; Oxidation (M)	63243	Protein ABHD16A OS=Homo sapiens OX=9606 GN=ABHD16A PE=1 SV=3
[truncated: 1,671 more rows]

## Sheet: CD34 related COIP proteins
Gene Name	Accession	Protein Name	-10lgP	Area CTL_IgG	Area osimertinib_IgG	Area CTL_CD34	Area osimertinib_CD34	osimertinib/CTL	PTM	Avg. Mass	Description
[truncated: 25 more rows]
